# Supplementary material for: Urinary caffeine and its metabolites in association with advanced liver fibrosis and liver steatosis: a nationwide cross-sectional study
Source: Royal Society of Chemistry journal article supplement (doi:10.1039/d3fo04957d), 2024-01-01
Supplement: d3fo04957d1.csv [file d3fo04957d1.csv]

SEQN	SDMVPSU	SDMVSTRA	BMXWAIST	LBXSTR	LBXSGTSI	LBXSATSI	LBXSASSI	LBXSAL	LBXSCA	LBXSGB	LBXGLU	LBDGLUSI	LBXIN	LBDINSI	LBXGH	LBXGLT	LBDHDD	LBDLYMNO	LBDMONO	LBDNENO	LBXPLTSI	URXUMA	Alcohol	Caffeine	Energy	Cycle	SBP	DBP	Diabetes	LF.NFS	LF.FIB4	LS.USFLI	LS.FLI	LS1	VH_class	Alcohol_class	NAFLD	BMI_class	MAFLD	MetS_class	Gender	Age_class	Race_class	Education_class	Marriage_class	PIR_class	Smoke_class	PAMED	PAMED_class
51656	2	77	92.5	148	19	26	25	4.4	9.4	2.2	134	7.438	11.84	71.04	6	156	37	1.7	0.3	2.8	177	1.8	20.5	0.2655	2034	2009-2010	105.3333333	74.66666667	1	0	0	0	0	0	0	0	0	<25	0	1	Male	40-59 years	Non-Hispanic White	College or above	Widowed/Divorced/Separated	4	Never	2280	Medium activity
51669	2	86	101.8	218	9	17	19	4.3	9.2	3.5	109	6.051	13.05	78.3	6.1	117	48	1.9	0.5	2.9	233	13.2	0	0	1780	2009-2010	156.6666667	85.33333333	0	0	0	0	0	0	0	0	0	≥25	0	1	Female	60 and above years	Mexican American	Middle school or lower	Married or living with a partner	1	Never	0	Inactive
51675	1	84	74.7	144	9	12	21	4.4	9.6	2.9	98	5.44	13.38	80.28	5.4	176	47	1.2	0.3	2.4	144	7.5	0	0.2275	827.5	2009-2010	146	39.33333333	0	0	1	0	0	0	0	0	0	<25	0	0	Female	60 and above years	Non-Hispanic White	Middle school or lower	Married or living with a partner	2	Never	18000	High activity
51694	2	80	121.5	147	97	92	51	4.4	9.6	2.9	197	10.935	28.47	170.82	10.3	352	36	1.5	0.7	2.6	504	56.6	0	0.17	3071.5	2009-2010	151.3333333	82	1	0	0	1	1	1	0	0	1	≥25	1	1	Male	20-39 years	Non-Hispanic White	High School	Married or living with a partner	2	Never	1440	Low activity
51724	2	77	79.7	55	14	20	24	3.9	9.3	2.9	99	5.495	6.92	41.52	5.4	77	54	1.8	0.4	2.2	245	6	7.8	0.182	1552.5	2009-2010	102.6666667	60	0	0	0	0	0	0	0	0	0	<25	0	0	Female	20-39 years	Other Hispanic	High School	Married or living with a partner	3	Never	1200	Low activity
51746	2	88	114.6	176	11	16	20	3.9	9.5	3.1	94	5.218	7.76	46.56	5.2	0	34	3.9	0.5	5.2	204	9.8	0	0	368.5	2009-2010	104	82	0	0	0	0	1	1	0	0	0	≥25	0	1	Female	40-59 years	Non-Hispanic Black	High School	Never Married	3	Current	3360	Medium activity
51747	3	86	141.5	142	69	38	33	3.6	9	3.3	192	10.658	41.52	249.12	7.8	0	42	1.9	0.7	4.7	200	81.5	0	0.24	1690	2009-2010	138	63.33333333	1	1	0	1	1	1	0	0	1	≥25	1	1	Male	60 and above years	Mexican American	Middle school or lower	Married or living with a partner	2	Current	0	Inactive
51760	1	77	96.1	392	22	19	24	4.3	9.2	3.2	88	4.885	17.36	104.16	4.9	132	32	1.8	0.7	4.8	299	10.5	0	0.164	1665	2009-2010	111.3333333	76.66666667	0	0	0	0	1	1	0	0	0	≥25	0	1	Female	20-39 years	Other Hispanic	Middle school or lower	Never Married	1	Current	0	Inactive
51762	2	78	81.9	58	29	34	30	4.1	9.4	3	91	5.051	5.08	30.48	5.5	0	57	3.5	0.6	1.6	255	26	9.3	0.1285	2484.5	2009-2010	112.6666667	52.66666667	0	0	0	0	0	0	0	0	0	≥25	0	0	Female	20-39 years	Non-Hispanic Black	High School	Married or living with a partner	1	Never	0	Inactive
51783	1	81	102.6	359	21	21	19	2.5	8.1	3.3	359	19.928	5.14	30.84	11.9	493	42	3.6	0.5	3.9	324	4550	0	0.048	2291.5	2009-2010	187.3333333	96.66666667	1	0	0	0	1	1	1	0	0	≥25	0	1	Male	40-59 years	Other Hispanic	High School	Married or living with a partner	1	Current	12720	High activity
51816	2	83	80.6	65	9	31	31	4.1	9.6	2.8	89	4.94	36.07	216.42	5.2	71	79	2.6	0.5	2.6	209	6.4	0	0.086	1639	2009-2010	123.3333333	71.33333333	0	0	0	0	0	0	0	0	0	<25	0	0	Female	20-39 years	Non-Hispanic Black	High School	Never Married	2	Never	760	Low activity
51817	3	86	81.5	118	11	16	23	4.2	9.5	2.5	89	4.94	6.53	39.18	5.5	0	64	1.2	0.5	6.3	267	14	0	0	962	2009-2010	118.6666667	64.66666667	0	0	0	0	0	0	0	0	0	<25	0	0	Female	60 and above years	Non-Hispanic White	High School	Never Married	4	Never	0	Inactive
51833	2	76	88.6	149	29	22	26	4.3	9.8	2.6	87	4.829	18.18	109.08	6	0	48	1.6	0.3	2.9	311	12.4	0	0.2585	1754	2009-2010	109	72	0	0	0	1	0	1	0	0	1	≥25	1	1	Female	40-59 years	Non-Hispanic White	Middle school or lower	Widowed/Divorced/Separated	2	Current	0	Inactive
51861	1	76	103.6	120	12	15	22	4.1	9.7	2.6	153	8.493	5.58	33.48	6.7	0	72	1.3	0.5	3.2	149	25.5	0	0.0735	1380	2009-2010	149.3333333	75.33333333	1	1	1	0	0	0	0	0	0	≥25	0	1	Male	60 and above years	Non-Hispanic White	High School	Married or living with a partner	4	Never	720	Low activity
51866	2	81	108	162	26	18	19	4	9.3	2.2	93	5.162	8.33	49.98	6.1	102	52	2.5	0.6	1.6	162	14.2	5.6	0.239	1858.5	2009-2010	140	81.33333333	0	0	0	0	1	1	0	0	0	≥25	0	1	Male	60 and above years	Non-Hispanic White	High School	Married or living with a partner	4	Never	80	Low activity
51888	1	80	101.1	118	20	21	22	4.7	9.3	2.8	125	6.939	4.14	24.84	5.5	111	42	2.7	0.6	6	241	7.9	0	0.004	2967.5	2009-2010	127.3333333	70	0	0	0	0	0	0	0	0	0	≥25	0	0	Male	60 and above years	Non-Hispanic White	College or above	Married or living with a partner	3	Never	6720	High activity
51906	2	83	113	81	71	40	37	3.8	8.7	2.6	90	4.996	16.16	96.96	6	96	39	1.2	0.9	2.8	270	2.6	0	0.202	1943	2009-2010	132.6666667	87.33333333	0	0	0	1	1	1	0	0	1	≥25	1	1	Male	40-59 years	Non-Hispanic White	High School	Married or living with a partner	3	Never	6000	High activity
51916	3	86	104.2	109	33	20	24	4.1	9.2	3.6	94	5.218	11.12	66.72	5.9	113	45	1.5	0.7	5.4	326	13.5	0	0.0855	2348.5	2009-2010	166	96	0	0	0	1	1	1	0	0	1	≥25	1	1	Female	60 and above years	Mexican American	High School	Widowed/Divorced/Separated	1	Never	13680	High activity
51919	2	81	104.6	161	15	14	20	4	9.1	2.8	104	5.773	23.06	138.36	5.5	91	45	1.5	0.7	3.5	265	7.1	0	0.0235	1973	2009-2010	106	61.33333333	0	0	0	1	1	1	0	0	1	≥25	1	1	Female	60 and above years	Non-Hispanic White	High School	Married or living with a partner	4	Current	0	Inactive
51928	1	86	82.2	108	7	20	27	3.9	8.9	3.4	93	5.162	3.82	22.92	5.7	145	61	1.5	0.4	2.1	182	141.5	0	0.426	1952	2009-2010	115.3333333	72	0	0	0	0	0	0	0	0	0	<25	0	0	Female	60 and above years	Other Race-Including Multi-Racial	High School	Married or living with a partner	1	Never	840	Low activity
51933	2	77	115.7	125	45	18	19	4.5	9.4	2.4	117	6.495	14.75	88.5	5.3	124	48	1.6	0.4	4.6	212	581	0	0.5775	2035.5	2009-2010	194	97.33333333	0	0	0	1	1	1	0	0	1	≥25	1	1	Male	40-59 years	Non-Hispanic White	High School	Never Married	3	Current	9120	High activity
51940	2	81	106.3	181	32	28	21	4.6	9.2	2.1	97	5.384	22.37	134.22	5.1	130	48	1.6	0.5	2.8	180	7.9	122.75	0.2125	4137	2009-2010	113.3333333	76.66666667	0	0	0	1	1	1	0	1	0	≥25	1	0	Male	20-39 years	Non-Hispanic White	High School	Married or living with a partner	2	Never	0	Inactive
51963	1	84	95.5	108	12	48	26	4.2	9.4	2.9	90	4.996	5.89	35.34	5	70	47	1	0.4	3.8	233	17.4	0	0	2755	2009-2010	94.66666667	61.33333333	0	0	0	0	0	0	0	0	0	<25	0	0	Male	40-59 years	Non-Hispanic White	High School	Married or living with a partner	4	Never	180	Low activity
51964	2	76	100.1	56	8	22	25	4.3	9.9	2.1	99	5.495	7.01	42.06	5.4	132	67	1.6	0.4	2.5	233	5.7	0	0.207	2449.5	2009-2010	129.3333333	84	0	0	0	0	0	0	0	0	0	≥25	0	0	Female	60 and above years	Non-Hispanic White	College or above	Widowed/Divorced/Separated	4	Never	1440	Low activity
51975	2	80	112	273	50	26	22	4.4	9.5	2.4	100	5.551	25.33	151.98	5.7	127	41	1.7	0.7	2.1	388	1267	0	0.2175	2055.5	2009-2010	129.3333333	73.33333333	0	0	0	1	1	1	0	0	1	≥25	1	1	Male	40-59 years	Non-Hispanic White	High School	Married or living with a partner	1	Current	1320	Low activity
52008	2	89	96.1	53	17	10	16	3.9	9.5	3.5	99	5.495	6.61	39.66	6	86	80	2.6	0.5	2.7	233	7.2	21.05	0.1375	1293.5	2009-2010	158.6666667	92	0	0	0	0	0	0	0	1	0	≥25	0	0	Female	60 and above years	Non-Hispanic Black	High School	Married or living with a partner	2	Current	840	Low activity
52009	1	77	84.9	49	7	11	20	4.4	9.2	3	88	4.885	3.72	22.32	5.3	90	79	1.9	0.4	3.5	262	9.5	24.3	0.199	1686.5	2009-2010	100	58.66666667	0	0	0	0	0	0	0	1	0	≥25	0	0	Female	40-59 years	Non-Hispanic White	College or above	Married or living with a partner	4	Never	1320	Low activity
52012	1	78	104.2	104	10	33	25	4	11.1	3.2	176	9.77	12.01	72.06	8.5	0	50	2.1	0.4	3.7	247	3.7	0	0.115	1289	2009-2010	125.3333333	61.33333333	1	0	0	0	0	0	0	0	0	≥25	0	1	Female	60 and above years	Non-Hispanic Black	College or above	Married or living with a partner	4	Never	860	Low activity
52025	1	89	98	92	29	57	44	4.2	9.5	3.2	95	5.273	12.38	74.28	5.4	94	52	2.6	0.8	2.7	209	1.7	0	0.0075	4000.5	2009-2010	105.3333333	62.66666667	0	0	0	1	1	1	0	0	1	≥25	1	0	Male	20-39 years	Mexican American	Middle school or lower	Married or living with a partner	2	Former	14400	High activity
52051	2	88	106.2	191	24	33	28	4.4	9.6	3.2	94	5.218	15.27	91.62	5.6	78	36	2.7	0.5	3.2	204	4.8	0	0.0885	595.5	2009-2010	100.6666667	62	0	0	0	1	1	1	0	0	1	≥25	1	1	Male	40-59 years	Other Hispanic	Middle school or lower	Married or living with a partner	2	Current	0	Inactive
52057	2	75	102.2	98	16	15	18	4.2	9.4	3	143	7.938	30.25	181.5	6.2	0	58	1.3	0.3	3	209	4.3	0	0.0015	1153	2009-2010	107.3333333	70.66666667	1	0	0	1	1	1	0	0	1	≥25	1	1	Female	40-59 years	Non-Hispanic White	High School	Widowed/Divorced/Separated	1	Never	0	Inactive
52058	2	75	93.9	153	14	19	24	4.3	9.1	2.4	100	5.551	2.84	17.04	5.6	94	37	2.1	0.4	2.4	248	3.8	111.9	0.213	3720	2009-2010	129.3333333	86	0	0	0	0	0	0	0	1	0	<25	0	1	Male	40-59 years	Non-Hispanic White	High School	Widowed/Divorced/Separated	2	Current	360	Low activity
52072	1	81	95.8	65	18	17	20	4.3	9.1	2.7	97	5.384	5.94	35.64	5.1	113	60	1.6	0.4	3	210	2	0	0.151	1933	2009-2010	119.3333333	60	0	0	0	0	0	0	0	0	0	≥25	0	0	Female	20-39 years	Mexican American	High School	Married or living with a partner	1	Never	480	Low activity
52083	2	86	105.7	289	30	84	53	4.4	9.6	3.2	91	5.051	27.36	164.16	4.8	117	37	2.3	0.6	3.1	265	1.7	0	0.1525	2759	2009-2010	126	64.66666667	0	0	0	1	1	1	0	0	1	≥25	1	1	Male	20-39 years	Mexican American	High School	Never Married	1	Never	760	Low activity
52088	1	77	79.2	133	17	21	29	4.4	9.3	2.8	92	5.107	3.95	23.7	5.4	105	76	2.3	0.7	3.6	197	4.4	13.25	0.305	1581.5	2009-2010	154.6666667	72.66666667	0	0	0	0	0	0	0	0	0	<25	0	0	Female	60 and above years	Non-Hispanic White	College or above	Widowed/Divorced/Separated	3	Current	420	Low activity
52119	2	78	94.8	73	20	19	26	4	9.1	3.3	113	6.273	8.21	49.26	5.5	202	76	1	0.7	5.6	209	26.7	44.6	0.0855	1396.5	2009-2010	118	27.33333333	1	0	0	0	0	0	0	1	0	≥25	0	1	Female	60 and above years	Non-Hispanic White	Middle school or lower	Widowed/Divorced/Separated	2	Current	320	Low activity
52122	2	85	117.5	56	15	17	22	4.1	9.4	3.1	97	5.384	4.81	28.86	5.4	71	76	1.1	0.4	3.7	177	7.2	40.25	0.306	2914	2009-2010	141.3333333	75.33333333	0	0	0	0	1	1	0	1	0	≥25	0	0	Male	60 and above years	Non-Hispanic White	High School	Married or living with a partner	4	Current	1960	Medium activity
52129	2	76	106	51	34	16	19	4	9.7	2.3	106	5.884	6.62	39.72	5.2	83	108	1.6	0.5	3.1	218	3.4	86.2	0.3915	2739.5	2009-2010	129.3333333	66	0	0	0	0	0	0	0	1	0	≥25	0	0	Male	60 and above years	Non-Hispanic White	Middle school or lower	Married or living with a partner	1	Current	720	Low activity
52137	2	76	103	245	24	23	24	4.3	9.5	2.9	92	5.107	9.45	56.7	5.9	144	42	3.1	0.4	3.9	182	5.1	0	0.043	1986.5	2009-2010	158.6666667	94.66666667	0	0	0	0	1	1	0	0	0	≥25	0	1	Female	40-59 years	Non-Hispanic White	High School	Married or living with a partner	3	Current	1800	Medium activity
52153	1	80	90	167	45	20	16	3.8	9.2	2.9	106	5.884	12.37	74.22	5.2	0	58	2.4	0.4	1.6	189	5.5	0	0.0245	1465	2009-2010	159.3333333	91.33333333	0	0	0	0	1	1	0	0	0	≥25	0	1	Female	20-39 years	Non-Hispanic Black	Middle school or lower	Never Married	1	Current	720	Low activity
52183	2	86	131.5	703	53	99	41	4.5	9.3	3	168	9.326	83.13	498.78	6.9	303	18	2	0.4	2.5	195	38.6	0	0.233	5732	2009-2010	156.6666667	86.66666667	1	0	0	1	1	1	0	0	1	≥25	1	1	Male	20-39 years	Mexican American	High School	Married or living with a partner	3	Never	0	Inactive
52195	2	76	93.6	150	27	29	29	4.6	9.5	2.6	92	5.107	5.37	32.22	5.7	209	73	1.5	0.3	3.7	231	19.5	16.75	0.3425	1511	2009-2010	110	67.33333333	1	0	0	0	0	0	0	0	0	<25	0	1	Female	40-59 years	Non-Hispanic White	High School	Married or living with a partner	3	Never	360	Low activity
52206	2	86	83.9	150	10	21	31	4	8.8	3.7	81	4.496	49.04	294.24	5.4	91	32	2.2	0.7	2.8	516	16.3	0	0.043	1367	2009-2010	123	67	0	0	0	1	0	1	0	0	1	≥25	1	0	Female	40-59 years	Mexican American	Middle school or lower	Widowed/Divorced/Separated	1	Current	0	Inactive
52221	1	85	88.4	103	225	40	36	4	10.6	3	91	5.051	5.41	32.46	5.5	164	62	0.9	0.5	3.2	130	125	0	0.257	1921.5	2009-2010	113.3333333	53.33333333	0	0	1	1	0	1	0	0	1	<25	0	0	Male	60 and above years	Non-Hispanic White	College or above	Married or living with a partner	4	Never	720	Low activity
52222	2	79	104	106	21	22	20	4	9.4	3.6	90	4.996	10.85	65.1	5.3	106	48	2.2	0.5	4.6	279	3.1	15.05	0.115	2709	2009-2010	108	71.33333333	0	0	0	0	1	1	0	0	0	≥25	0	0	Female	20-39 years	Non-Hispanic White	College or above	Married or living with a partner	3	Never	760	Low activity
52243	1	87	94.3	148	15	15	22	4.5	9.4	2.4	96	5.329	7.96	47.76	5.5	221	52	2	0.6	2.9	189	9.7	0	0.0145	1423.5	2009-2010	116	65.33333333	1	1	0	0	0	0	0	0	0	≥25	0	0	Male	60 and above years	Non-Hispanic White	Middle school or lower	Married or living with a partner	3	Never	4320	High activity
52265	2	84	74.5	59	11	39	27	4.6	9.1	2.6	93	5.162	8.45	50.7	5.3	0	58	2.4	0.6	3.2	223	57.8	0	0.071	3506	2009-2010	110.6666667	62.66666667	0	0	0	0	0	0	0	0	0	<25	0	0	Male	20-39 years	Non-Hispanic White	College or above	Never Married	4	Never	720	Low activity
52271	1	85	91	143	14	17	24	4.6	10.1	3.2	127	7.05	9.06	54.36	6.3	149	67	2.2	0.5	3	199	14	0	0.061	1434.5	2009-2010	155.3333333	49.33333333	1	0	0	0	0	0	0	0	0	<25	0	1	Female	60 and above years	Mexican American	Middle school or lower	Widowed/Divorced/Separated	2	Never	840	Low activity
52280	1	76	107.2	70	16	20	20	4.6	9.8	3.1	82	4.552	7.91	47.46	5.3	64	50	1.8	0.3	5.2	217	4.4	0	0.0195	3120.5	2009-2010	100	64	0	0	0	0	0	0	0	0	0	≥25	0	0	Male	20-39 years	Other Hispanic	High School	Never Married	1	Never	5280	High activity
52314	2	84	74	59	9	14	18	4.3	9.3	3.1	90	4.996	6.96	41.76	5.4	82	67	1.9	0.3	2.7	292	17.7	0	0.0355	1659.5	2009-2010	96.66666667	62.66666667	0	0	0	0	0	0	0	0	0	<25	0	0	Female	20-39 years	Non-Hispanic White	High School	Married or living with a partner	2	Current	1740	Low activity
52333	1	82	74.8	70	22	15	20	4.7	9.8	2.9	105	5.829	6.36	38.16	5.8	168	65	1.6	0.5	6.5	284	6.4	0	0.002	1563	2009-2010	96	69.33333333	0	0	0	0	0	0	0	0	0	<25	0	0	Female	40-59 years	Other Hispanic	High School	Married or living with a partner	4	Never	960	Low activity
52348	1	87	118.1	107	19	22	30	4.3	7.5	3.1	108	5.995	14.33	85.98	5.2	110	43	1.5	0.3	3.5	238	30.7	0	0.289	3884	2009-2010	140	98	0	0	0	0	1	1	0	0	0	≥25	0	0	Male	40-59 years	Non-Hispanic Black	High School	Married or living with a partner	4	Current	3440	Medium activity
52349	1	78	92.5	93	38	30	23	4	9.7	3	83	4.607	8.53	51.18	5.7	67	58	1.7	0.3	3.4	202	3.3	0	0.209	1491.5	2009-2010	133.3333333	54.66666667	0	0	0	0	0	0	0	0	0	<25	0	0	Male	40-59 years	Non-Hispanic Black	Middle school or lower	Widowed/Divorced/Separated	3	Former	6240	High activity
52368	2	84	123.2	77	12	13	17	3.8	9.1	3	92	5.107	21.49	128.94	5.3	102	53	2.1	0.4	2.9	225	4.2	0	0.066	1987.5	2009-2010	111.3333333	66	0	0	0	1	1	1	0	0	1	≥25	1	0	Female	20-39 years	Non-Hispanic White	College or above	Married or living with a partner	3	Current	520	Low activity
52369	2	75	104.7	148	19	14	19	4.4	9.9	3.3	182	10.103	11.29	67.74	7.9	0	43	1.8	0.4	3.5	255	7.2	0	0.615	1268.5	2009-2010	158	60.66666667	1	0	0	1	1	1	0	0	1	≥25	1	1	Female	60 and above years	Non-Hispanic White	Middle school or lower	Widowed/Divorced/Separated	2	Current	0	Inactive
52377	2	87	117.3	468	22	23	16	4.5	10	2.9	103	5.718	15.43	92.58	5.5	110	43	1.6	0.5	6.1	361	16.4	0	0.0325	1405	2009-2010	96	66.66666667	0	0	0	1	1	1	0	0	1	≥25	1	1	Female	40-59 years	Non-Hispanic White	High School	Widowed/Divorced/Separated	1	Current	0	Inactive
52390	2	75	85.8	56	10	14	18	5	9.8	2.7	96	5.329	12.33	73.98	4.8	100	67	2.4	0.6	4.5	216	6.4	0	0	648	2009-2010	99.33333333	54.66666667	0	0	0	0	0	0	0	0	0	<25	0	0	Female	20-39 years	Non-Hispanic White	High School	Never Married	2	Never	1440	Low activity
52415	2	82	95.7	40	18	17	20	3.8	9.3	3.4	84	4.663	19.35	116.1	5.2	0	70	1.7	0.5	4.3	302	2.2	0	0.036	1054	2009-2010	90	71.33333333	0	0	0	0	0	0	1	0	0	≥25	0	0	Female	20-39 years	Non-Hispanic Black	Middle school or lower	Never Married	1	Never	3360	Medium activity
52437	1	75	91	111	33	28	22	4.3	9.3	3.5	104	5.773	24.5	147	6.1	201	47	2.6	0.4	6.8	284	31.7	0	0.0665	2093.5	2009-2010	116.6666667	59.33333333	1	0	0	1	0	1	0	0	1	≥25	1	1	Female	40-59 years	Mexican American	High School	Married or living with a partner	1	Never	0	Inactive
52447	2	88	120.2	77	19	50	34	4.2	9.4	3.4	86	4.774	18.65	111.9	5.5	0	42	1.4	1	4.7	340	17.1	0	0.026	1463	2009-2010	114	61.33333333	0	0	0	1	1	1	0	0	1	≥25	1	0	Female	20-39 years	Non-Hispanic White	High School	Never Married	3	Never	2400	Medium activity
52450	1	82	113.8	200	29	21	18	3.8	9	2.8	113	6.273	28.89	173.34	5.6	131	30	1.7	0.4	5.4	306	6	0	0.105	4684	2009-2010	124.6666667	66.66666667	0	0	0	1	1	1	0	0	1	≥25	1	1	Male	60 and above years	Non-Hispanic White	Middle school or lower	Married or living with a partner	3	Current	840	Low activity
52451	2	85	90	46	17	17	24	4.4	9.3	3.2	89	4.94	22.61	135.66	5.9	89	82	1.9	0.4	4.3	241	4.2	0	0	1230	2009-2010	118.6666667	48	0	0	0	1	0	1	0	0	1	<25	1	0	Female	20-39 years	Mexican American	College or above	Never Married	2	Never	4080	High activity
52453	1	84	91.3	156	15	20	24	4.3	9.2	3.3	101	5.607	12.49	74.94	5.5	191	57	1.8	0.6	5.4	197	15.7	13.6	0.098	1878	2009-2010	126	62	0	0	0	0	0	0	0	0	0	≥25	0	1	Female	60 and above years	Non-Hispanic White	College or above	Widowed/Divorced/Separated	3	Current	0	Inactive
52457	2	82	115.2	204	29	56	33	4.2	9	2.8	101	5.607	29.32	175.92	5.5	140	32	1.9	0.8	4.3	297	12.1	0	0.058	4125	2009-2010	136	88.66666667	0	0	0	1	1	1	0	0	1	≥25	1	1	Male	20-39 years	Non-Hispanic White	High School	Married or living with a partner	1	Never	720	Low activity
52466	1	76	116.8	83	34	25	28	3.9	9.4	2.5	149	8.271	13.8	82.8	6.3	0	58	2.6	0.5	2.7	251	16.2	49.1	0.082	2591.5	2009-2010	128	60	1	0	0	1	1	1	0	1	0	≥25	1	1	Female	60 and above years	Non-Hispanic White	High School	Married or living with a partner	3	Current	0	Inactive
52475	1	79	78.2	112	36	19	27	4.4	9.4	3.1	84	4.663	4.47	26.82	5.7	104	66	2.8	0.3	3.5	213	9	0	0.0835	1666.5	2009-2010	117.3333333	66.66666667	0	0	0	0	0	0	0	0	0	<25	0	0	Female	20-39 years	Non-Hispanic White	High School	Never Married	1	Never	8800	High activity
52477	2	86	89.5	147	17	17	18	4.3	9.2	3.1	94	5.218	18.76	112.56	5.3	188	47	2.1	0.5	3.8	252	185	0	0.041	1809.5	2009-2010	119.3333333	80.66666667	0	0	0	1	0	1	0	0	1	≥25	1	1	Female	20-39 years	Mexican American	Middle school or lower	Married or living with a partner	1	Never	1260	Low activity
52535	1	83	93	113	28	48	38	4.8	9.5	3.3	96	5.329	7.14	42.84	5.1	89	58	1.7	0.4	3.4	263	7.6	0	0.2775	1438.5	2009-2010	110.6666667	66.66666667	0	0	0	0	0	0	0	0	0	≥25	0	0	Male	40-59 years	Non-Hispanic White	High School	Married or living with a partner	4	Never	240	Low activity
52543	1	77	95.7	100	14	20	15	4.4	9.2	2.8	101	5.607	6.93	41.58	5.8	238	60	1.8	0.9	4.8	345	5.7	0	0.257	1990.5	2009-2010	104	63.33333333	1	0	0	0	0	0	0	0	0	≥25	0	1	Female	60 and above years	Non-Hispanic White	College or above	Married or living with a partner	4	Never	960	Low activity
52548	1	84	112.6	110	119	45	31	3.9	9.3	3.6	93	5.162	10.91	65.46	5.4	0	47	1.4	0.9	4.5	283	6.1	0	0.084	2366.5	2009-2010	126.6666667	62.66666667	0	0	0	0	1	1	0	0	0	≥25	0	0	Male	20-39 years	Non-Hispanic Black	High School	Never Married	2	Never	9600	High activity
52557	1	82	93.5	84	59	22	28	4.5	10.4	2.7	106	5.884	9.49	56.94	5.3	153	76	1	0.7	4.9	213	1.6	42.1	0.357	1872	2009-2010	143.3333333	80.66666667	0	0	0	1	0	1	0	1	0	<25	1	0	Male	60 and above years	Non-Hispanic White	College or above	Married or living with a partner	4	Never	2640	Medium activity
52562	1	82	92.2	423	21	24	24	4.4	9.7	2.9	96	5.329	8.05	48.3	5.2	0	37	2.2	0.4	3.9	253	10.4	18.7	0.317	2237	2009-2010	122	80	0	0	0	0	1	1	0	0	0	≥25	0	0	Male	20-39 years	Other Race-Including Multi-Racial	High School	Married or living with a partner	1	Current	1920	Medium activity
52570	1	84	102.6	698	16	15	21	4	9.3	3.3	101	5.607	16.97	101.82	4.3	78	20	2.4	0.7	4.3	173	9.8	132.35	0.1585	3344	2009-2010	117.3333333	66	0	0	0	0	1	1	0	1	0	≥25	0	1	Male	20-39 years	Non-Hispanic Black	High School	Widowed/Divorced/Separated	3	Never	0	Inactive
52572	2	78	88.1	90	36	19	25	4.2	9.3	2.9	88	4.885	4.41	26.46	5.5	110	67	1.7	0.3	3.2	258	8.6	1.15	0.109	1471	2009-2010	85.33333333	48.66666667	0	0	0	0	0	0	0	0	0	≥25	0	0	Female	60 and above years	Other Hispanic	College or above	Married or living with a partner	4	Never	600	Low activity
52577	2	77	87	126	27	19	23	4.6	9.6	3	131	7.272	6.58	39.48	6.2	260	52	2.2	0.6	3.1	233	9.3	9.35	0.3465	1994	2009-2010	110	62	1	0	0	0	0	0	0	0	0	<25	0	0	Male	60 and above years	Non-Hispanic White	College or above	Widowed/Divorced/Separated	4	Current	1240	Low activity
52587	2	81	99.8	89	26	16	18	4.1	9.2	3.5	92	5.107	35.47	212.82	5.4	105	81	1.5	0.6	3.3	287	7.7	0	0.0505	544	2009-2010	120	47.33333333	0	0	0	1	0	1	0	0	1	≥25	1	0	Female	60 and above years	Non-Hispanic Black	High School	Never Married	1	Current	0	Inactive
52614	1	77	85.3	119	25	16	19	4.1	9.6	3.6	85	4.718	8.18	49.08	5.7	121	71	2.5	0.6	9.3	412	1.3	0	0	1854.5	2009-2010	99.33333333	60.66666667	0	0	0	0	0	0	0	0	0	<25	0	0	Female	20-39 years	Non-Hispanic White	High School	Married or living with a partner	1	Current	0	Inactive
52619	2	81	129.4	35	16	17	25	4	9.3	3.1	117	6.495	25.88	155.28	5.8	102	58	0.6	0.2	7.2	182	159	0	0.233	2501	2009-2010	187.3333333	92.66666667	0	1	0	1	1	1	0	0	1	≥25	1	1	Male	60 and above years	Non-Hispanic White	High School	Married or living with a partner	3	Current	0	Inactive
52660	2	88	100	277	11	13	16	4.6	10	3.1	148	8.215	16.71	100.26	6.7	0	38	3.1	0.5	7.3	328	3	0	0.022	1567.5	2009-2010	145.3333333	76	1	0	0	1	1	1	0	0	1	≥25	1	1	Female	60 and above years	Mexican American	High School	Widowed/Divorced/Separated	3	Current	0	Inactive
52685	1	83	71.6	59	20	14	18	4.3	8.8	2.9	77	4.274	4.93	29.58	4.4	136	62	1.6	0.5	2.6	320	1.8	100.75	5.00E-04	1954.5	2009-2010	109.3333333	54	0	0	0	0	0	0	0	1	0	<25	0	0	Female	20-39 years	Mexican American	High School	Married or living with a partner	4	Never	80	Low activity
52690	2	85	108.6	138	11	17	22	4.2	9.2	2.8	98	5.44	16.17	97.02	5.1	93	50	1.5	0.4	2.1	237	18.3	26.8	0.303	1558.5	2009-2010	128	72	0	0	0	1	1	1	0	1	0	≥25	1	0	Female	40-59 years	Mexican American	High School	Married or living with a partner	4	Current	1080	Low activity
52730	2	86	88.2	78	16	21	22	4.4	9.8	2.8	96	5.329	5.78	34.68	5.2	108	80	2.4	0.4	4.1	290	1.2	0	0.3325	1919	2009-2010	106	72	0	0	0	0	0	0	0	0	0	<25	0	0	Female	40-59 years	Non-Hispanic White	High School	Married or living with a partner	4	Current	120	Low activity
52751	2	77	73.5	49	17	17	19	3.9	9.2	2	93	5.162	3.45	20.7	5.6	140	71	0.8	0.2	2.5	180	4.3	0.8	0.1465	1567.5	2009-2010	128.6666667	64.66666667	0	0	0	0	0	0	0	0	0	<25	0	0	Female	60 and above years	Non-Hispanic White	High School	Married or living with a partner	4	Never	0	Inactive
52756	2	81	96.5	74	13	19	26	4.4	9.3	2.4	109	6.051	3.81	22.86	5.7	148	50	0.9	0.5	2.9	178	4.6	0	0	1879	2009-2010	131.3333333	48.66666667	0	0	1	0	0	0	0	0	0	<25	0	0	Male	60 and above years	Non-Hispanic White	College or above	Married or living with a partner	3	Never	2520	Medium activity
52759	2	80	100.6	61	13	14	19	3.7	9	3.3	127	7.05	11.39	68.34	6	101	62	1.4	0.4	2.3	477	5.1	0	0.0035	1866.5	2009-2010	122.6666667	65.33333333	1	0	0	0	0	0	0	0	0	≥25	0	1	Female	60 and above years	Non-Hispanic Black	High School	Widowed/Divorced/Separated	2	Current	3240	Medium activity
52763	1	84	88.5	174	22	15	16	4.2	9.3	3.4	284	15.765	4.55	27.3	12.2	0	28	2.9	0.6	4.4	203	9.2	12.85	0.073	2978	2009-2010	126.6666667	10.66666667	1	0	0	0	0	0	0	0	0	≥25	0	1	Male	20-39 years	Non-Hispanic Black	High School	Married or living with a partner	3	Never	0	Inactive
52813	1	77	115.3	167	24	34	30	4.4	9.5	3.5	89	4.94	16.72	100.32	5.3	132	45	2.5	0.8	5.1	209	5.4	0.55	0.267	937.5	2009-2010	123	78	0	0	0	1	1	1	0	0	1	≥25	1	1	Male	60 and above years	Non-Hispanic White	College or above	Married or living with a partner	4	Current	0	Inactive
52823	1	80	116.4	39	13	14	16	4	8.8	2.4	92	5.107	3.44	20.64	4.9	89	50	1.5	0.3	1.7	212	5	0	0.079	1440	2009-2010	98	56.66666667	0	0	0	0	1	1	0	0	0	≥25	0	0	Female	40-59 years	Non-Hispanic White	High School	Never Married	2	Current	2400	Medium activity
52832	2	75	100.7	59	14	18	19	4.4	9.1	3	90	4.996	16.63	99.78	5.4	78	61	2.6	0.8	5.7	333	9.7	5.45	0.2405	2938	2009-2010	102	47.33333333	0	0	0	0	0	0	0	0	0	≥25	0	0	Female	20-39 years	Non-Hispanic White	High School	Widowed/Divorced/Separated	2	Current	0	Inactive
52839	1	82	86.8	33	37	26	41	3.9	9.3	3.5	130	7.216	7.24	43.44	9.7	0	80	0.8	0.8	4.5	248	996	0.5	0.067	1470	2009-2010	128	66	1	0	0	0	0	0	0	0	0	<25	0	0	Male	60 and above years	Other Race-Including Multi-Racial	High School	Married or living with a partner	2	Current	240	Low activity
52841	2	80	104.9	197	31	29	33	4.9	9.6	3.5	93	5.162	23.45	140.7	5.6	182	38	2.4	0.8	4.5	239	19.1	0	0.1185	1818.5	2009-2010	152.6666667	46.66666667	0	0	0	1	1	1	0	0	1	≥25	1	1	Female	60 and above years	Non-Hispanic White	High School	Widowed/Divorced/Separated	2	Never	0	Inactive
52878	2	86	83.4	75	14	12	18	4.2	9.2	2.4	90	4.996	7.42	44.52	5.2	111	64	1.4	0.4	3.1	264	3.3	0.1	0.223	1198.5	2009-2010	129.3333333	88	0	0	0	0	0	0	0	0	0	≥25	0	0	Female	40-59 years	Non-Hispanic White	College or above	Widowed/Divorced/Separated	2	Current	0	Inactive
52928	1	81	105.9	172	20	52	41	4	8.6	3.5	90	4.996	13.4	80.4	5.7	106	42	3.1	0.5	3.7	246	4.5	0	0.05	2105	2009-2010	111.3333333	60	0	0	0	0	1	1	0	0	0	≥25	0	1	Female	20-39 years	Other Hispanic	Middle school or lower	Married or living with a partner	2	Former	1040	Low activity
52931	2	76	115.5	67	16	20	23	4.4	9.5	2.9	99	5.495	21.79	130.74	5.5	101	44	2.2	0.9	5	210	1.9	7	0.3445	1999	2009-2010	140	67.33333333	0	0	0	1	1	1	0	0	1	≥25	1	0	Male	60 and above years	Non-Hispanic White	College or above	Married or living with a partner	4	Current	2160	Medium activity
53028	1	76	109.1	70	12	24	29	4	8.8	2.8	99	5.495	18.11	108.66	5.3	70	59	1.3	0.5	5.2	236	6	22.25	0.187	1504	2009-2010	113.3333333	66.66666667	0	0	0	1	1	1	0	1	0	≥25	1	0	Female	40-59 years	Mexican American	High School	Married or living with a partner	4	Former	360	Low activity
53041	1	88	110.9	145	19	28	28	3.8	8.9	2.9	99	5.495	11.42	68.52	4.8	145	45	1.4	0.6	3.5	245	1.5	0	0.142	1577	2009-2010	122.6666667	66.66666667	0	0	0	1	1	1	0	0	1	≥25	1	0	Female	60 and above years	Mexican American	High School	Never Married	4	Former	3600	High activity
53066	1	84	70.6	54	12	15	20	3.9	8.9	2.3	98	5.44	3.22	19.32	5.2	76	46	1.4	0.5	2.9	213	23.1	0	0.0595	2767	2009-2010	104.6666667	70	0	0	0	0	0	0	0	0	0	<25	0	0	Female	20-39 years	Non-Hispanic White	College or above	Never Married	3	Never	0	Inactive
53075	2	79	127.7	143	10	11	19	3.9	9.3	2.7	87	4.829	8.55	51.3	5.6	103	51	2.9	0.6	2.7	275	1.4	0	0.161	1552	2009-2010	136.6666667	36.66666667	0	0	0	0	1	1	0	0	0	≥25	0	0	Female	60 and above years	Non-Hispanic White	High School	Widowed/Divorced/Separated	4	Never	0	Inactive
53092	2	75	94.3	110	15	12	12	4.3	9.7	3.6	90	4.996	14.76	88.56	5.6	101	40	4.2	0.6	4.3	293	1	0	0.0615	1383.5	2009-2010	120.6666667	41.33333333	0	0	0	0	0	0	0	0	0	≥25	0	0	Female	40-59 years	Non-Hispanic Black	High School	Married or living with a partner	2	Current	10800	High activity
53100	1	76	87.6	134	16	17	22	4.1	9.4	3.1	99	5.495	6.14	36.84	5.6	192	67	1.6	0.3	2.3	251	6.8	0	0.089	2815.5	2009-2010	120.6666667	74.66666667	0	0	0	0	0	0	0	0	0	<25	0	0	Female	40-59 years	Non-Hispanic White	College or above	Married or living with a partner	4	Never	1880	Medium activity
53104	1	83	113	90	16	21	17	3.7	8.5	2.4	100	5.551	18.17	109.02	5.9	102	45	2.2	0.5	8	284	4.8	0	0.0155	1827	2009-2010	121.3333333	78.66666667	0	0	0	1	1	1	0	0	1	≥25	1	1	Female	40-59 years	Non-Hispanic White	High School	Married or living with a partner	4	Current	420	Low activity
53121	2	78	95.5	83	17	31	34	4.4	9.7	2.8	184	10.214	49.09	294.54	5.1	150	46	2.1	0.5	2	218	22.2	0	0	2512	2009-2010	120.6666667	76.66666667	1	0	0	1	0	1	0	0	1	≥25	1	0	Male	60 and above years	Non-Hispanic Black	College or above	Married or living with a partner	2	Never	2760	Medium activity
53130	1	77	99.1	110	74	57	41	4.2	9.6	2.8	95	5.273	7.12	42.72	5.3	97	54	2.3	0.6	2.7	243	4	39.1	0.167	2709	2009-2010	120	72.66666667	0	0	0	0	1	1	0	1	0	≥25	0	0	Male	40-59 years	Non-Hispanic White	College or above	Widowed/Divorced/Separated	4	Never	1500	Low activity
53131	2	84	75.8	42	27	18	19	4.4	9.7	2.8	81	4.496	3.69	22.14	5.4	0	93	1.7	0.5	1.6	221	3	23.4	0.097	3307	2009-2010	112.6666667	88	0	0	0	0	0	0	0	0	0	<25	0	0	Male	20-39 years	Non-Hispanic Black	Middle school or lower	Married or living with a partner	2	Current	3360	Medium activity
53161	2	75	95.4	94	56	25	31	4.2	9.2	3.5	87	4.829	25.49	152.94	5.3	98	63	2.7	0.6	7.4	336	8.8	0	0.1285	1830	2009-2010	109.3333333	57.33333333	0	0	0	1	0	1	0	0	1	≥25	1	0	Female	40-59 years	Other Hispanic	High School	Never Married	4	Never	200	Low activity
53166	2	77	85.1	73	36	27	23	4.3	9.7	3	92	5.107	13.06	78.36	5.5	70	50	2	0.3	2.2	239	5.1	0	0.121	2227	2009-2010	110.6666667	62.66666667	0	0	0	0	0	0	0	0	0	<25	0	0	Female	20-39 years	Mexican American	High School	Never Married	3	Never	720	Low activity
53169	1	76	97.3	57	40	13	23	3.6	8.6	4	125	6.939	18.77	112.62	5.1	198	47	0.4	0.1	1.1	65	55.8	0	0.0775	1403.5	2009-2010	100.6666667	58	0	1	1	1	0	1	0	0	1	<25	1	0	Male	60 and above years	Non-Hispanic White	High School	Married or living with a partner	3	Current	0	Inactive
53188	1	81	105.9	99	44	23	25	4	9.4	3.2	102	5.662	19.53	117.18	5.6	165	75	2.1	0.3	1.8	204	6.9	0	0.109	1242	2009-2010	116.6666667	62	0	0	0	1	1	1	0	0	1	≥25	1	0	Female	60 and above years	Mexican American	Middle school or lower	Widowed/Divorced/Separated	1	Current	720	Low activity
53202	1	75	108	104	39	35	28	4.5	9.3	3.1	107	5.94	13.74	82.44	5.5	116	49	2.3	0.6	3.6	209	13	0	0.2	2686	2009-2010	135.3333333	74	0	0	0	1	1	1	0	0	1	≥25	1	0	Male	20-39 years	Mexican American	Middle school or lower	Married or living with a partner	2	Never	0	Inactive
53239	1	87	92.6	147	19	15	22	4.3	9.3	2.6	97	5.384	5.73	34.38	5.6	105	56	2.4	0.3	1.7	284	0.9	0	0.076	1236.5	2009-2010	136.6666667	68.66666667	0	0	0	0	0	0	0	0	0	≥25	0	1	Female	60 and above years	Non-Hispanic White	College or above	Married or living with a partner	4	Never	0	Inactive
53243	2	81	125.2	355	12	19	22	4	9.3	3.3	88	4.885	8.89	53.34	6	154	32	3.2	1	10.2	124	9.7	0	0.5095	1373.5	2009-2010	130	80	0	0	0	0	1	1	0	0	0	≥25	0	1	Female	40-59 years	Non-Hispanic White	High School	Widowed/Divorced/Separated	1	Current	3600	High activity
53266	3	86	97	180	108	43	32	4.2	9.3	3.3	108	5.995	11.27	67.62	6.1	125	62	2.3	0.6	3.1	263	6.5	7	0.0545	1929.5	2009-2010	114.6666667	70.66666667	0	0	0	1	1	1	0	0	1	≥25	1	0	Male	40-59 years	Mexican American	Middle school or lower	Widowed/Divorced/Separated	2	Never	55440	High activity
53278	2	85	96.4	188	28	23	28	4.3	9.2	2.7	108	5.995	14.36	86.16	6	74	42	1.9	0.5	3.5	244	25.1	0	0.4185	2583	2009-2010	109.3333333	64.66666667	0	0	0	1	1	1	0	0	1	≥25	1	1	Female	60 and above years	Mexican American	High School	Married or living with a partner	2	Never	1260	Low activity
53302	2	76	118.2	296	32	31	29	4.2	9.4	2.5	98	5.44	12	72	5.5	88	36	1.6	0.4	3.5	261	8.3	0	0.224	2666.5	2009-2010	126.6666667	88.66666667	0	0	0	1	1	1	0	0	1	≥25	1	1	Male	40-59 years	Non-Hispanic White	High School	Widowed/Divorced/Separated	3	Never	720	Low activity
53312	1	75	87.5	121	12	16	23	4.6	9.7	3.2	100	5.551	19.03	114.18	5	105	42	1.5	0.4	4.4	296	11.9	18.6	0.043	1412	2009-2010	102.6666667	74.66666667	0	0	0	0	0	0	0	0	0	<25	0	0	Female	20-39 years	Mexican American	High School	Married or living with a partner	2	Never	1440	Low activity
53327	2	78	87.3	91	23	32	28	4.2	9.2	2.6	87	4.829	6.43	38.58	4.8	38	39	1.7	0.7	3.8	216	2.4	0	0	1895.5	2009-2010	102.6666667	58.66666667	0	0	0	0	0	0	0	0	0	≥25	0	0	Male	20-39 years	Other Hispanic	Middle school or lower	Married or living with a partner	2	Never	3360	Medium activity
53338	1	84	99.3	81	37	23	22	3.7	9.3	3.7	93	5.162	13.35	80.1	5.3	0	41	3.2	0.4	2.5	258	17.4	0	0.035	1471.5	2009-2010	132	71	0	0	0	0	1	1	0	0	0	≥25	0	1	Female	40-59 years	Non-Hispanic Black	High School	Never Married	1	Current	0	Inactive
53341	1	80	109.5	155	26	21	25	3.8	8.8	2.8	102	5.662	19.75	118.5	5.8	112	30	1.8	0.7	3.7	189	13.6	0	0.5415	1481	2009-2010	122.6666667	78	0	0	0	1	1	1	0	0	1	≥25	1	0	Male	60 and above years	Other Hispanic	High School	Widowed/Divorced/Separated	3	Never	420	Low activity
53342	1	80	120.2	154	41	68	58	4.1	9	2.9	111	6.162	26.27	157.62	6.2	0	53	1.6	0.6	3.1	184	8.5	0	0.0035	1478.5	2009-2010	136.6666667	79.33333333	1	0	0	1	1	1	0	0	1	≥25	1	1	Male	40-59 years	Non-Hispanic White	College or above	Married or living with a partner	3	Never	0	Inactive
53345	2	83	83.5	67	14	15	19	4.1	9.3	2.9	81	4.496	4.76	28.56	5.2	58	30	2.9	0.3	6.6	289	9.9	0	0.1095	1542	2009-2010	105.3333333	46	0	0	0	0	0	0	0	0	0	≥25	0	0	Female	20-39 years	Non-Hispanic White	High School	Never Married	1	Current	1200	Low activity
53361	1	88	91.7	89	17	25	33	5	9.9	2.7	94	5.218	10.62	63.72	5	0	74	1	0.2	2	87	31.4	0	0.025	1619	2009-2010	225	104	0	0	1	0	0	0	1	0	0	≥25	0	0	Female	60 and above years	Mexican American	Middle school or lower	Married or living with a partner	1	Never	0	Inactive
53412	1	79	68.1	48	17	15	19	4.1	9.5	3.3	80	4.441	4.86	29.16	5.5	0	70	1.8	0.3	1.2	171	2.7	0	0.014	1604.5	2009-2010	123	87	0	0	0	0	0	0	0	0	0	<25	0	0	Female	20-39 years	Non-Hispanic Black	Middle school or lower	Married or living with a partner	1	Never	2520	Medium activity
53427	1	79	93.7	63	13	30	30	4.9	9.6	2.4	99	5.495	4.41	26.46	5.1	128	54	1	0.4	1.8	180	8.7	0	0.302	1697.5	2009-2010	126.6666667	90.66666667	0	0	0	0	0	0	0	0	0	≥25	0	0	Male	40-59 years	Non-Hispanic White	College or above	Married or living with a partner	4	Current	2520	Medium activity
53472	1	80	92.5	263	20	13	15	4.3	9.5	2.9	93	5.162	6.13	36.78	5.8	121	47	3.3	0.6	6.1	206	1.4	0	1.3845	2820.5	2009-2010	124	60.66666667	0	0	0	0	0	0	0	0	0	≥25	0	1	Female	40-59 years	Non-Hispanic White	High School	Married or living with a partner	3	Current	1440	Low activity
53489	1	86	82.2	82	10	35	43	4.8	9.1	2.7	101	5.607	7.1	42.6	4.7	129	28	2.7	1	2.4	125	10.5	0	0.025	895.5	2009-2010	118.6666667	64	0	0	0	0	0	0	0	0	0	<25	0	0	Male	20-39 years	Mexican American	College or above	Never Married	2	Never	1840	Medium activity
53495	1	77	82.2	129	13	13	18	4.4	9.3	2.8	100	5.551	2.27	13.62	5.6	76	33	1.3	0.4	3.1	175	7.7	0	0.231	4943	2009-2010	120.6666667	59.33333333	0	0	0	0	0	0	0	0	0	<25	0	0	Male	20-39 years	Non-Hispanic White	High School	Married or living with a partner	2	Current	13440	High activity
53501	1	79	99.7	76	19	32	24	4.4	9.6	2.3	98	5.44	9.49	56.94	5.3	117	54	1.7	0.3	3.2	242	4.2	21.05	0.19	2097	2009-2010	114.6666667	63.33333333	0	0	0	0	0	0	0	0	0	≥25	0	0	Male	40-59 years	Non-Hispanic White	College or above	Married or living with a partner	4	Never	3000	Medium activity
53505	1	86	135	99	18	37	24	3.8	9.4	2.8	101	5.607	15.88	95.28	5.7	0	42	2.3	0.7	3.6	215	8.5	0	0.3775	2053.5	2009-2010	141.3333333	101.3333333	0	0	0	1	1	1	0	0	1	≥25	1	0	Male	40-59 years	Non-Hispanic White	High School	Widowed/Divorced/Separated	2	Current	19500	High activity
53515	1	84	107.5	95	14	30	22	4.5	9	2.3	101	5.607	6.55	39.3	5.3	106	42	1.9	0.5	3.2	227	9.3	7	0.3635	2836	2009-2010	140.6666667	74	0	0	0	0	1	1	0	0	0	≥25	0	0	Male	40-59 years	Non-Hispanic White	High School	Married or living with a partner	3	Current	1000	Low activity
53523	1	76	80.6	95	15	15	22	4.3	9.2	2.8	91	5.051	8.62	51.72	4.8	96	57	1.4	0.4	2.7	155	16	0	5.00E-04	2048.5	2009-2010	96.66666667	64	0	0	0	0	0	0	0	0	0	<25	0	0	Female	20-39 years	Non-Hispanic White	High School	Married or living with a partner	3	Never	1680	Low activity
53537	1	81	75.2	62	11	10	15	4.3	9.5	3.7	94	5.218	6.01	36.06	5.4	111	72	1.8	0.3	2.5	411	8.7	0	0.016	1157.5	2009-2010	104	68.66666667	0	0	0	0	0	0	0	0	0	<25	0	0	Female	20-39 years	Mexican American	Middle school or lower	Widowed/Divorced/Separated	1	Never	1920	Medium activity
53557	1	88	123.3	78	22	46	31	3.8	9.4	3.3	93	5.162	27.92	167.52	5.7	77	48	4	1	1.8	378	8.7	0	0.0175	3312	2009-2010	112.6666667	54.66666667	0	0	0	1	1	1	1	0	0	≥25	1	0	Female	20-39 years	Mexican American	High School	Married or living with a partner	4	Never	480	Low activity
53571	1	78	92.1	96	22	17	15	4.3	9.7	3.7	167	9.27	11.16	66.96	7.4	0	45	2.1	0.4	4.3	417	14.2	0	0.0365	2177.5	2009-2010	122.6666667	92	1	0	0	0	0	0	0	0	0	≥25	0	1	Female	40-59 years	Non-Hispanic Black	High School	Married or living with a partner	2	Never	400	Low activity
53586	2	76	89	84	21	31	40	4.7	9.8	3	92	5.107	7.69	46.14	6	197	81	1.8	0.9	4.2	207	4.7	0	0.117	1854	2009-2010	122	57.33333333	0	0	1	0	0	0	0	0	0	<25	0	0	Male	60 and above years	Non-Hispanic White	Middle school or lower	Married or living with a partner	3	Never	0	Inactive
53597	1	88	116	83	26	22	21	3.8	9.1	3	88	4.885	18.21	109.26	5.4	103	66	2	0.7	3.4	347	2.9	0	0.214	2343	2009-2010	123	82	0	0	0	0	1	1	0	0	0	≥25	0	0	Female	40-59 years	Non-Hispanic Black	High School	Married or living with a partner	2	Never	0	Inactive
53616	2	78	108.1	145	19	16	19	4.1	9.2	2.1	120	6.661	9.13	54.78	5.7	240	104	1.7	0.5	3.9	171	9.3	43.6	0.219	1780	2009-2010	122.6666667	42.66666667	1	1	0	0	1	1	0	1	0	≥25	0	0	Male	60 and above years	Non-Hispanic White	College or above	Married or living with a partner	4	Current	720	Low activity
53640	1	83	98.5	137	28	29	23	4.4	9.3	2.3	97	5.384	11.22	67.32	5.1	125	34	2.2	0.4	4	160	3.1	133.9	0.0195	3211	2009-2010	114	62.66666667	0	0	0	0	1	1	0	1	0	≥25	0	0	Male	20-39 years	Non-Hispanic White	High School	Married or living with a partner	4	Current	1360	Low activity
53684	2	88	102	153	24	32	24	4.5	9.6	3.3	111	6.162	9.15	54.9	6	67	49	1.7	0.4	6.1	289	11.1	29.75	0.0855	5172	2009-2010	130	84	0	0	0	0	1	1	0	0	0	≥25	0	1	Male	40-59 years	Mexican American	Middle school or lower	Married or living with a partner	1	Never	4560	High activity
53697	1	81	84.8	51	23	47	42	4.5	9.9	3.1	103	5.718	5.66	33.96	5.7	97	60	2.1	0.6	3.9	348	8	10.15	0.0705	3474.5	2009-2010	134	66.66666667	0	0	0	0	0	0	0	0	0	<25	0	0	Female	60 and above years	Mexican American	High School	Never Married	3	Never	1680	Low activity
53701	1	78	104.6	62	43	24	27	4.1	9.1	3.6	130	7.216	22.67	136.02	6.4	0	44	2.5	0.5	1.4	205	58.3	0	0.0745	987.5	2009-2010	135.3333333	75.33333333	1	0	0	1	1	1	0	0	1	≥25	1	1	Female	60 and above years	Non-Hispanic Black	High School	Married or living with a partner	3	Never	400	Low activity
53714	2	80	145.4	102	20	13	15	4.1	9.4	3.6	102	5.662	27.71	166.26	5.3	0	24	1.7	0.4	3.9	172	5.3	0	0.0025	2801.5	2009-2010	113.3333333	60.66666667	1	1	0	1	1	1	0	0	1	≥25	1	1	Male	60 and above years	Non-Hispanic Black	High School	Married or living with a partner	3	Never	0	Inactive
53732	3	86	133.5	121	15	30	26	4.3	9.9	2.8	114	6.328	24.92	149.52	6.2	203	39	1.3	0.6	5.7	232	8.9	0	0.2555	1469	2009-2010	139.3333333	74.66666667	1	1	0	1	1	1	0	0	1	≥25	1	1	Male	60 and above years	Non-Hispanic White	High School	Married or living with a partner	4	Never	3360	Medium activity
53743	2	76	117.3	135	21	16	17	4.2	9.4	3.2	158	8.771	17.38	104.28	7.5	0	41	1.7	0.3	6.2	254	2.4	0	0.801	3025	2009-2010	123.3333333	72	1	0	0	1	1	1	0	0	1	≥25	1	1	Male	60 and above years	Non-Hispanic White	College or above	Married or living with a partner	3	Never	1200	Low activity
53756	2	76	103.1	194	46	23	33	4.5	9.6	2.4	116	6.439	23.22	139.32	6.3	213	43	1.7	0.4	3.2	158	135	0.7	0.014	1439.5	2009-2010	122	66	1	1	1	1	1	1	0	0	1	≥25	1	1	Male	60 and above years	Non-Hispanic White	Middle school or lower	Married or living with a partner	2	Current	0	Inactive
53763	1	79	111.2	108	15	21	19	4.1	9.3	2.5	107	5.94	23.83	142.98	5.6	147	53	1.2	0.3	3.4	234	8.6	0	0.1155	1931.5	2009-2010	103	71	0	0	0	1	1	1	0	0	1	≥25	1	0	Female	60 and above years	Non-Hispanic White	College or above	Never Married	3	Current	0	Inactive
53764	1	80	100.8	56	25	26	19	4	9.4	3.5	93	5.162	9.53	57.18	5.9	90	66	1.8	0.4	3.2	261	4.5	0	0.217	1447	2009-2010	130.6666667	90.66666667	0	0	0	0	0	0	0	0	0	≥25	0	0	Female	40-59 years	Non-Hispanic Black	College or above	Widowed/Divorced/Separated	3	Never	3600	High activity
53772	2	82	100.5	111	27	34	31	4	9	3.6	93	5.162	20.4	122.4	5.7	133	40	1.2	0.3	2.3	305	10.8	0	0.0945	1664.5	2009-2010	120	77.33333333	0	0	0	1	1	1	0	0	1	≥25	1	0	Female	40-59 years	Other Hispanic	High School	Married or living with a partner	2	Never	0	Inactive
53774	1	81	105.2	93	58	56	36	4.2	9	2.5	120	6.661	24.48	146.88	5.6	180	69	3.5	0.4	2.8	220	6.8	0	0.0775	2537.5	2009-2010	115.3333333	75.33333333	0	0	0	1	1	1	0	0	1	≥25	1	0	Male	40-59 years	Mexican American	College or above	Married or living with a partner	4	Never	600	Low activity
53779	1	87	76	81	13	15	22	4	9.6	2.8	89	4.94	4.09	24.54	5.2	85	74	1.9	0.2	5.2	313	9.7	0	0.781	750	2009-2010	125.3333333	51.33333333	0	0	0	0	0	0	0	0	0	<25	0	0	Female	40-59 years	Mexican American	Middle school or lower	Widowed/Divorced/Separated	1	Current	0	Inactive
53782	3	86	114.5	62	13	14	19	4.3	9.1	2.9	114	6.328	20.37	122.22	6.2	137	38	1.5	0.6	4	294	6.9	0	0.331	1598.5	2009-2010	125.3333333	43.33333333	0	0	0	1	0	1	0	0	1	≥25	1	1	Male	60 and above years	Non-Hispanic White	High School	Married or living with a partner	4	Current	0	Inactive
53829	1	86	89.5	182	13	20	24	4.2	9.3	3.1	97	5.384	9.34	56.04	5.7	122	57	2.3	0.4	3.6	235	7.2	0	0.506	1646	2009-2010	110.6666667	70	0	0	0	0	0	0	0	0	0	<25	0	1	Female	40-59 years	Other Race-Including Multi-Racial	Middle school or lower	Married or living with a partner	1	Never	2040	Medium activity
53845	2	88	93.2	119	14	18	19	4	9.2	3.4	88	4.885	10.77	64.62	5.9	121	55	1.7	0.6	3.7	301	5.7	10.75	0.007	1707	2009-2010	117.3333333	85.33333333	0	0	0	0	0	0	0	0	0	≥25	0	0	Female	40-59 years	Mexican American	Middle school or lower	Married or living with a partner	2	Never	0	Inactive
53853	2	78	75.5	51	9	15	18	4.2	9.2	2.5	90	4.996	6.66	39.96	4.9	78	54	2.1	0.3	1.9	244	12.6	0	0.018	1173.5	2009-2010	103.3333333	52	0	0	0	0	0	0	0	0	0	<25	0	0	Female	20-39 years	Non-Hispanic Black	High School	Never Married	3	Never	1640	Low activity
53886	1	83	85.7	126	11	14	13	4.2	9.4	2.7	91	5.051	9.03	54.18	4.9	111	34	1.6	0.3	4.4	221	6.6	0	0.049	1765	2009-2010	122.6666667	79.33333333	0	0	0	0	0	0	0	0	0	<25	0	0	Male	40-59 years	Non-Hispanic White	High School	Never Married	1	Current	1200	Low activity
53940	2	77	89.2	65	7	11	27	4.2	9.3	3	89	4.94	7.25	43.5	5.5	80	92	1.5	0.6	3.1	185	28.4	0	0.1525	1199	2009-2010	126.6666667	62	0	0	1	0	0	0	0	0	0	<25	0	0	Female	60 and above years	Non-Hispanic White	Middle school or lower	Widowed/Divorced/Separated	2	Current	0	Inactive
53955	2	76	117.3	148	46	19	28	4	8.9	2.6	85	4.718	10.79	64.74	5.4	99	50	2.5	0.6	5.8	351	6.8	0	0.0305	1033.5	2009-2010	113.3333333	52	0	0	0	1	1	1	0	0	1	≥25	1	0	Female	20-39 years	Non-Hispanic White	High School	Never Married	1	Current	480	Low activity
54001	2	78	106.9	99	25	23	30	4.2	9.3	3.1	91	5.051	13.89	83.34	5.2	70	65	1.2	0.2	1.3	123	7.1	0	0.158	698	2009-2010	129.3333333	62.66666667	0	1	1	0	1	1	0	0	0	≥25	0	0	Female	60 and above years	Non-Hispanic Black	High School	Married or living with a partner	2	Current	0	Inactive
54024	2	88	84.1	132	29	34	37	4.3	9.2	3.4	88	4.885	6.62	39.72	5.2	88	51	1.3	0.4	3.6	203	159.5	0	0.038	1758.5	2009-2010	122.6666667	54	0	0	0	0	0	0	0	0	0	<25	0	0	Male	60 and above years	Non-Hispanic White	College or above	Married or living with a partner	4	Never	420	Low activity
54047	2	77	107.7	54	32	29	27	4.3	9	2.4	103	5.718	12.56	75.36	5.6	76	30	1.7	0.5	3	219	5.5	0	0.234	2024.5	2009-2010	115.3333333	79.33333333	0	0	0	1	1	1	0	0	1	≥25	1	0	Male	40-59 years	Mexican American	Middle school or lower	Married or living with a partner	2	Current	11520	High activity
54060	1	88	137.2	115	52	23	18	3.9	9.3	2.7	115	6.384	29.85	179.1	6.1	158	44	2.5	0.2	4.4	272	7.3	0	0.0045	2251	2009-2010	112	62	0	0	0	1	1	1	0	0	1	≥25	1	1	Female	40-59 years	Non-Hispanic Black	Middle school or lower	Widowed/Divorced/Separated	1	Current	4080	High activity
54085	1	89	117.7	113	15	19	31	4.4	10.3	3.2	109	6.051	22.57	135.42	6	149	40	2.8	0.8	5.8	408	10.7	0	0.0685	2316	2009-2010	123.3333333	64.66666667	0	0	0	1	1	1	0	0	1	≥25	1	0	Male	60 and above years	Non-Hispanic White	College or above	Married or living with a partner	4	Never	0	Inactive
54114	1	82	102.7	61	13	12	21	4.2	9.9	4	89	4.94	17.07	102.42	5.7	89	82	2.9	0.8	3.7	672	4.2	4.7	0.083	2651	2009-2010	126	86.66666667	0	0	0	0	0	0	0	0	0	≥25	0	0	Female	20-39 years	Non-Hispanic Black	Middle school or lower	Widowed/Divorced/Separated	2	Never	0	Inactive
54119	2	83	91.8	105	12	15	21	3.9	9.3	3.9	85	4.718	7.53	45.18	5.8	97	76	1.8	0.5	3.7	200	4.7	0	0.239	1756	2009-2010	112.6666667	70.66666667	0	0	0	0	0	0	0	0	0	<25	0	0	Female	40-59 years	Other Race-Including Multi-Racial	College or above	Married or living with a partner	2	Never	3360	Medium activity
54123	2	80	94.1	295	25	16	18	4.2	9.6	2.4	111	6.162	27.8	166.8	5	99	27	1.6	0.3	4.7	184	3.9	0	0.0905	3091	2009-2010	104	71	0	0	0	1	1	1	0	0	1	≥25	1	1	Male	20-39 years	Non-Hispanic White	Middle school or lower	Married or living with a partner	1	Current	27360	High activity
54143	2	81	110.7	276	49	18	17	4	9.5	2.7	100	5.551	35.37	212.22	6.1	145	55	2.7	0.4	6	268	4.5	0	0.062	1702	2009-2010	139.3333333	62	0	0	0	1	1	1	0	0	1	≥25	1	1	Female	60 and above years	Non-Hispanic White	High School	Married or living with a partner	4	Never	0	Inactive
54164	1	80	130.6	76	40	29	31	4.1	9.4	2.9	107	5.94	21.56	129.36	5.7	128	43	2.2	0.7	5.1	297	218.5	0	0.064	2009	2009-2010	112.6666667	80	0	0	0	1	1	1	0	0	1	≥25	1	0	Female	20-39 years	Non-Hispanic Black	Middle school or lower	Married or living with a partner	1	Current	1920	Medium activity
54170	1	75	89.4	72	19	21	22	4.5	9.6	2.7	100	5.551	6.13	36.78	5.4	89	58	1.6	0.3	4.3	281	9.9	0	0.121	1948.5	2009-2010	125.3333333	74.66666667	0	0	0	0	0	0	0	0	0	<25	0	0	Male	60 and above years	Mexican American	Middle school or lower	Married or living with a partner	3	Current	1920	Medium activity
54172	2	75	111.7	84	23	24	26	4.6	9.6	2.7	98	5.44	16.16	96.96	5.8	116	38	2.5	0.4	4.1	195	25	0	0	3645.5	2009-2010	122.6666667	73.33333333	0	0	0	1	1	1	0	0	1	≥25	1	0	Male	20-39 years	Mexican American	High School	Never Married	1	Former	6720	High activity
54196	2	75	87.2	58	13	21	23	4.7	10	3.2	98	5.44	4.67	28.02	5.2	127	48	0.6	0.3	2.6	264	4.3	0	0.346	2888.5	2009-2010	102	63.33333333	0	0	0	0	0	0	0	0	0	<25	0	0	Male	60 and above years	Non-Hispanic White	College or above	Married or living with a partner	4	Current	1140	Low activity
54215	1	79	77.3	56	18	16	17	4.8	9.4	2.6	86	4.774	4.37	26.22	5.2	159	59	2.4	0.5	5.3	206	4.1	0.15	0.2515	1340.5	2009-2010	96.66666667	65.33333333	0	0	0	0	0	0	1	0	0	<25	0	0	Female	20-39 years	Other Race-Including Multi-Racial	College or above	Married or living with a partner	3	Never	240	Low activity
54237	1	85	87.7	59	12	15	16	4.6	9.6	3.1	75	4.163	4.1	24.6	4.8	72	50	2.3	0.6	5.6	293	8.6	24.55	0.0925	1618	2009-2010	106.6666667	63.33333333	0	0	0	0	0	0	0	1	0	<25	0	0	Female	20-39 years	Mexican American	High School	Married or living with a partner	4	Never	840	Low activity
54245	1	78	109.7	65	68	53	47	4.3	9.5	2.8	100	5.551	15	90	5.4	158	51	1.7	0.4	1.5	158	1283	31.15	0.141	1501	2009-2010	144	66.66666667	0	0	0	1	1	1	0	1	0	≥25	1	0	Male	60 and above years	Non-Hispanic Black	College or above	Married or living with a partner	3	Never	0	Inactive
54290	1	78	106.9	93	56	39	27	3.9	9.2	3.6	100	5.551	25.02	150.12	5.1	103	47	2.4	0.5	3.7	324	23.1	7	0.0195	1166	2009-2010	137.3333333	88	0	0	0	1	1	1	0	0	1	≥25	1	1	Female	40-59 years	Non-Hispanic Black	Middle school or lower	Married or living with a partner	3	Current	24240	High activity
54301	2	87	102.5	159	31	44	30	4.7	10	2.8	99	5.495	15.41	92.46	5.5	133	41	2.4	0.5	5.6	254	4	35.1	0.1585	2196.5	2009-2010	125.3333333	84	0	0	0	1	1	1	0	1	0	≥25	1	0	Male	40-59 years	Mexican American	Middle school or lower	Married or living with a partner	2	Never	4320	High activity
54309	2	76	91.7	142	33	38	26	4	9.1	3.5	101	5.607	16.59	99.54	5.4	123	44	3.1	0.4	3.4	241	4.2	0	0.032	2808	2009-2010	128	80	0	0	0	1	0	1	0	0	1	≥25	1	0	Female	20-39 years	Mexican American	Middle school or lower	Married or living with a partner	3	Never	360	Low activity
54326	2	82	96.3	82	22	23	21	4	9.2	2.9	90	4.996	18.53	111.18	5.5	145	50	1.7	0.5	3	300	3.8	0	0.0795	2848	2009-2010	101.3333333	78.66666667	0	0	0	0	0	0	0	0	0	≥25	0	0	Female	20-39 years	Other Hispanic	Middle school or lower	Married or living with a partner	2	Never	2640	Medium activity
54346	2	77	100.6	73	21	16	23	4.1	9.4	3.7	110	6.106	6.16	36.96	6	0	56	2.2	0.5	3.6	341	1.3	0	0.053	279	2009-2010	114	71.33333333	0	0	0	0	0	0	0	0	0	≥25	0	0	Female	60 and above years	Other Hispanic	Middle school or lower	Married or living with a partner	3	Never	4320	High activity
54367	2	85	113.7	156	17	33	32	4.4	9.2	3.2	97	5.384	17.99	107.94	5.4	144	61	1.7	0.4	4.3	236	8.6	0	0	1285.5	2009-2010	117.3333333	52.66666667	0	0	0	1	1	1	0	0	1	≥25	1	1	Female	40-59 years	Non-Hispanic White	College or above	Married or living with a partner	2	Never	2000	Medium activity
54386	1	87	97.1	122	27	47	33	4.7	9.4	2.9	98	5.44	13.36	80.16	5.5	0	79	2.5	0.9	5.4	256	10	14.05	0.2135	2943	2009-2010	125.3333333	80	0	0	0	1	0	1	0	0	1	≥25	1	0	Male	40-59 years	Mexican American	Middle school or lower	Married or living with a partner	3	Former	0	Inactive
54415	2	80	96	841	39	43	30	4.1	9.2	3.1	116	6.439	10.01	60.06	5.7	184	22	2	0.9	6.7	146	26.9	0	0.0225	5109	2009-2010	101.3333333	60	0	0	0	0	1	1	0	0	0	≥25	0	1	Male	40-59 years	Non-Hispanic White	High School	Married or living with a partner	2	Current	6720	High activity
54418	2	84	117.5	185	11	28	37	4.2	9.5	2.8	93	5.162	9.79	58.74	5.7	114	52	1.9	0.6	7.1	187	6.7	0	0.1865	1483.5	2009-2010	102	66.66666667	0	0	0	0	1	1	0	0	0	≥25	0	0	Female	40-59 years	Non-Hispanic White	Middle school or lower	Married or living with a partner	3	Current	3840	High activity
54430	3	86	112	165	28	47	35	4.3	9.2	2.8	112	6.217	31.85	191.1	5.4	177	32	2.3	0.6	3.1	233	4	0	0.01	2072.5	2009-2010	108	69.33333333	0	0	0	1	1	1	0	0	1	≥25	1	1	Male	40-59 years	Non-Hispanic White	College or above	Married or living with a partner	3	Never	480	Low activity
54439	1	87	106.5	109	15	20	24	4.3	9.2	3.3	131	7.272	10.34	62.04	6.3	0	53	2	0.3	1.7	171	0.8	14.05	0.003	1909	2009-2010	144	90.66666667	1	0	0	1	0	1	0	0	1	≥25	1	1	Male	60 and above years	Mexican American	Middle school or lower	Married or living with a partner	2	Never	0	Inactive
54498	2	83	89.8	37	16	13	16	4	9.2	2.3	91	5.051	6.3	37.8	5.5	79	79	1.7	0.6	3.3	257	6.9	0	0.002	2732	2009-2010	123.3333333	72	0	0	0	0	0	0	0	0	0	≥25	0	0	Female	20-39 years	Non-Hispanic Black	High School	Never Married	2	Never	2460	Medium activity
54509	2	78	134.1	440	32	28	28	3.9	9.3	2.8	182	10.103	44.2	265.2	7.3	0	27	2	0.5	5.9	356	6	0	0.0865	2461.5	2009-2010	115.3333333	50.66666667	1	0	0	1	1	1	0	0	1	≥25	1	1	Male	60 and above years	Non-Hispanic White	Middle school or lower	Married or living with a partner	2	Current	0	Inactive
54524	1	82	112.4	219	17	22	18	3.9	9.4	3.3	115	6.384	19.91	119.46	5.5	148	47	1.7	0.4	3.5	203	3	0	0.123	2028	2009-2010	122.6666667	78	0	0	0	1	1	1	0	0	1	≥25	1	1	Female	40-59 years	Mexican American	High School	Married or living with a partner	1	Never	480	Low activity
54534	2	80	83.2	73	18	18	20	4.1	9.5	2.8	86	4.774	5.37	32.22	5.1	67	61	3.1	0.9	6.7	250	1.7	33.85	1.8045	1852	2009-2010	122	87.33333333	0	0	0	0	0	0	0	1	0	<25	0	0	Female	20-39 years	Non-Hispanic White	High School	Married or living with a partner	1	Current	840	Low activity
54540	1	86	167	154	29	32	27	3.8	9	3	144	7.993	49.95	299.7	8	0	36	2	0.8	6.7	238	10.4	0	0.2885	2359.5	2009-2010	112.6666667	84	1	1	0	1	1	1	0	0	1	≥25	1	1	Male	40-59 years	Other Hispanic	Middle school or lower	Widowed/Divorced/Separated	3	Never	0	Inactive
54553	2	77	96.3	109	23	26	26	4.1	9.6	2.8	90	4.996	8.03	48.18	5.3	88	48	2.1	0.6	5.3	388	5.9	18.6	0.002	1825	2009-2010	118	66	0	0	0	0	0	0	0	0	0	≥25	0	0	Male	60 and above years	Non-Hispanic White	College or above	Married or living with a partner	4	Never	720	Low activity
54555	1	80	120.6	115	17	27	23	3.7	8.9	3	99	5.495	10.13	60.78	4.8	75	49	2.3	0.5	4.3	228	28.2	11.35	0.139	2476	2009-2010	108	50.66666667	0	0	0	0	1	1	0	0	0	≥25	0	0	Female	20-39 years	Non-Hispanic White	High School	Never Married	3	Never	4320	High activity
54556	2	82	88.3	146	10	15	16	4.3	9.3	2.8	88	4.885	9.33	55.98	5.5	115	50	2.1	0.5	4.7	295	31.2	0	0.006	2501.5	2009-2010	107	73	0	0	0	0	0	0	0	0	0	≥25	0	0	Female	20-39 years	Non-Hispanic White	College or above	Married or living with a partner	1	Never	1920	Medium activity
54565	1	76	81.8	85	19	23	26	4.7	9.7	2.8	88	4.885	4.93	29.58	5.1	72	73	2.3	0.6	5	233	8.9	16.65	0.244	1435	2009-2010	118.6666667	67.33333333	0	0	0	0	0	0	0	0	0	<25	0	0	Female	20-39 years	Non-Hispanic White	High School	Never Married	4	Never	14400	High activity
54569	2	89	94.8	149	18	22	34	4.2	9.4	3.1	106	5.884	17.73	106.38	5.5	137	40	1.9	0.6	5.7	356	4.4	0	0.23	1684	2009-2010	109.3333333	72	0	0	0	1	0	1	0	0	1	<25	1	0	Male	40-59 years	Non-Hispanic White	High School	Widowed/Divorced/Separated	2	Current	0	Inactive
54587	2	86	101	72	11	16	19	4.2	9.6	2.6	71	3.941	11.1	66.6	4.9	0	50	1.6	0.4	3.6	309	8.9	4.3	0.031	1168	2009-2010	112.6666667	59.33333333	0	0	0	0	0	0	0	0	0	≥25	0	0	Female	20-39 years	Non-Hispanic White	High School	Never Married	3	Current	0	Inactive
54603	1	86	87	77	19	12	18	4.3	9.4	2.8	95	5.273	10.76	64.56	4.9	137	74	1.7	0.4	2.7	216	19.2	0	0.1075	1158	2009-2010	101.3333333	57.33333333	0	0	0	0	0	0	0	0	0	<25	0	0	Female	20-39 years	Mexican American	Middle school or lower	Never Married	1	Never	6960	High activity
54612	1	78	81.1	79	18	23	24	4.4	9.8	3.5	114	6.328	14.4	86.4	6	243	119	1.7	0.4	2.2	201	1.4	9.05	0.043	2016	2009-2010	120.6666667	54	1	0	0	0	0	0	0	0	0	≥25	0	0	Female	60 and above years	Non-Hispanic Black	High School	Widowed/Divorced/Separated	1	Never	720	Low activity
54631	1	82	95.5	140	37	36	33	4.4	9.8	3.9	202	11.213	11.36	68.16	8	0	42	2.7	0.6	5	202	2.6	0	0.2125	1424.5	2009-2010	170.6666667	78.66666667	1	0	0	1	0	1	0	0	1	≥25	1	0	Male	60 and above years	Mexican American	High School	Married or living with a partner	3	Never	4800	High activity
54637	2	83	76	150	16	10	22	4.2	9	2.6	91	5.051	7.5	45	5.6	165	46	1.6	0.5	5	274	18.4	0	0.005	624	2009-2010	176.6666667	61.33333333	0	0	0	0	0	0	0	0	0	<25	0	0	Female	60 and above years	Non-Hispanic White	High School	Married or living with a partner	2	Never	5040	High activity
54668	2	89	74.9	213	18	15	17	4.9	9.6	2.3	88	4.885	11.44	68.64	5.1	91	56	2.4	0.5	4.3	210	9.7	0	0.4435	952.5	2009-2010	108.6666667	55.33333333	0	0	0	0	0	0	0	0	0	<25	0	0	Male	20-39 years	Non-Hispanic White	College or above	Married or living with a partner	3	Current	1680	Low activity
54709	2	76	105	131	16	14	24	3.9	8.7	2.5	100	5.551	20.64	123.84	5.4	104	37	1.2	0.6	4.4	175	6.2	0	0.2875	1771	2009-2010	122.6666667	54.66666667	0	1	1	1	1	1	0	0	1	≥25	1	1	Male	60 and above years	Non-Hispanic White	Middle school or lower	Married or living with a partner	4	Current	3840	High activity
54719	1	84	99	146	31	15	16	3.9	9.1	3.4	92	5.107	10.24	61.44	4.5	93	59	2.8	0.3	2.8	251	3.1	2.65	0	1439	2009-2010	136	67.33333333	0	0	0	0	1	1	0	0	0	≥25	0	0	Female	20-39 years	Non-Hispanic Black	College or above	Married or living with a partner	3	Never	0	Inactive
54732	2	83	131.5	100	9	21	17	3.6	8.7	2.6	98	5.44	8.09	48.54	5.3	110	59	1.4	0.4	4.7	239	7.6	0	0.23	2015.5	2009-2010	116.6666667	71.33333333	0	0	0	0	1	1	0	0	0	≥25	0	0	Female	20-39 years	Non-Hispanic White	High School	Married or living with a partner	1	Never	0	Inactive
54743	1	80	92.5	154	13	22	27	4.5	10	2.9	112	6.217	9.42	56.52	5.5	109	47	2.3	0.6	2.5	290	9.9	0	0.3135	1579.5	2009-2010	154	74	0	0	0	0	0	0	0	0	0	≥25	0	1	Female	60 and above years	Non-Hispanic White	Middle school or lower	Married or living with a partner	2	Current	0	Inactive
54746	2	76	97	196	22	28	26	4.3	9.4	2.8	100	5.551	39.49	236.94	5.8	133	26	2	0.5	2.8	226	7	0	0.016	2784	2009-2010	122.6666667	73.33333333	0	0	0	1	1	1	0	0	1	≥25	1	0	Male	40-59 years	Non-Hispanic White	High School	Widowed/Divorced/Separated	3	Never	5340	High activity
54754	1	88	106	169	13	17	20	4.1	9.3	2.8	103	5.718	16.57	99.42	5.6	123	51	1.7	0.3	4.8	230	12	0	0.094	1530	2009-2010	120	60	0	0	0	1	1	1	0	0	1	≥25	1	0	Female	60 and above years	Mexican American	Middle school or lower	Widowed/Divorced/Separated	1	Never	0	Inactive
54790	1	78	95.5	65	10	26	30	4	8.9	3.4	106	5.884	6.58	39.48	6.1	0	63	2.2	0.6	2.1	200	8.5	31.15	0.3385	3411	2009-2010	126	78	0	0	0	0	0	0	0	1	0	≥25	0	0	Male	40-59 years	Non-Hispanic Black	Middle school or lower	Married or living with a partner	1	Never	19800	High activity
54791	1	79	90.2	65	9	20	21	4.2	9.4	2.8	87	4.829	5.2	31.2	5.9	0	70	1.8	0.3	2	165	4.2	23.35	0.052	2284.5	2009-2010	108	77.33333333	0	0	0	0	0	0	0	1	0	≥25	0	0	Female	40-59 years	Other Hispanic	Middle school or lower	Never Married	2	Current	3080	Medium activity
54803	1	88	114.3	105	39	12	22	4.3	9.5	3	179	9.936	42.68	256.08	7.5	0	33	1.2	0.3	7.2	161	11.7	11.15	0.109	2061	2009-2010	142.6666667	64.66666667	1	1	0	1	1	1	0	0	1	≥25	1	1	Male	60 and above years	Non-Hispanic White	High School	Widowed/Divorced/Separated	3	Never	15360	High activity
54808	1	77	123.5	88	20	22	20	4.4	11.1	3	96	5.329	13.06	78.36	5.1	125	51	1.1	0.7	3.7	200	20.9	0	0.037	2844.5	2009-2010	154.6666667	66.66666667	0	0	0	1	1	1	0	0	1	≥25	1	0	Male	60 and above years	Non-Hispanic White	College or above	Married or living with a partner	3	Never	5160	High activity
54812	2	79	119.2	266	42	19	29	4	9.1	2.9	102	5.662	21.15	126.9	5.5	106	46	2.9	0.6	4.2	280	7	0	0.083	1380	2009-2010	112.6666667	57.33333333	0	0	0	1	1	1	0	0	1	≥25	1	1	Female	60 and above years	Non-Hispanic White	High School	Widowed/Divorced/Separated	2	Current	80	Low activity
54818	2	85	89.9	53	25	33	22	4.1	9.9	2.9	82	4.552	8.62	51.72	5.3	87	62	1.8	0.6	5.1	232	6.5	0	0.071	1877	2009-2010	112	64.66666667	0	0	0	0	0	0	0	0	0	<25	0	0	Female	20-39 years	Mexican American	High School	Married or living with a partner	2	Never	720	Low activity
54839	2	81	90.8	115	12	16	31	4	9.3	3	107	5.94	6.92	41.52	6	289	55	2.1	0.7	2.8	176	3.7	27.25	0.0575	1818.5	2009-2010	155.3333333	64	1	1	1	0	0	0	0	0	0	<25	0	0	Male	60 and above years	Non-Hispanic White	College or above	Married or living with a partner	4	Never	120	Low activity
54846	3	86	112.5	86	28	46	35	4.1	8.9	2.8	113	6.273	24.06	144.36	5.9	170	55	2.7	0.5	2.6	123	4.3	0	0.18	1546	2009-2010	118	72.66666667	0	1	0	1	1	1	0	0	1	≥25	1	0	Male	40-59 years	Mexican American	Middle school or lower	Married or living with a partner	1	Never	240	Low activity
54850	2	84	82	58	22	23	23	4.5	9.4	2.5	101	5.607	11.09	66.54	4.9	70	35	1.8	0.5	1.9	221	1.6	0	0	2254.5	2009-2010	123.3333333	64.66666667	0	0	0	0	0	0	0	0	0	≥25	0	0	Male	20-39 years	Other Hispanic	High School	Never Married	1	Never	4540	High activity
54861	2	76	113.5	247	36	39	35	4.3	9.6	2.7	116	6.439	64.94	389.64	6.9	0	53	1.5	0.6	5.5	295	23	0	0.2425	3066.5	2009-2010	105.3333333	45.33333333	1	0	0	1	1	1	0	0	1	≥25	1	1	Female	60 and above years	Non-Hispanic White	Middle school or lower	Married or living with a partner	2	Current	0	Inactive
54866	1	83	111.5	146	21	20	28	4.6	9.4	3	148	8.215	7.59	45.54	6.7	0	47	1.3	0.6	3	172	42.5	0	0.001	1276.5	2009-2010	114	72	1	1	0	0	1	1	0	0	0	≥25	0	1	Male	60 and above years	Other Race-Including Multi-Racial	Middle school or lower	Married or living with a partner	1	Current	0	Inactive
54895	1	87	95.5	196	40	61	35	4.2	9.2	3.1	91	5.051	10.54	63.24	5.2	98	50	1.4	0.3	3.4	254	11	0	0.0605	1477.5	2009-2010	104.6666667	70	0	0	0	1	1	1	0	0	1	≥25	1	0	Male	20-39 years	Mexican American	Middle school or lower	Widowed/Divorced/Separated	1	Current	2880	Medium activity
54903	2	86	121.1	54	28	34	25	3.9	9.6	3.5	114	6.328	35.48	212.88	6.5	278	46	2.2	0.8	8.6	290	4.3	0	0.112	1260.5	2009-2010	122	65.33333333	1	0	0	1	1	1	0	0	1	≥25	1	1	Female	40-59 years	Non-Hispanic White	High School	Married or living with a partner	3	Current	0	Inactive
54907	2	83	95.3	51	16	11	17	4.3	9.1	2.4	87	4.829	5.81	34.86	5.1	81	68	2.4	0.5	3.8	169	7.2	0	0.2845	1157.5	2009-2010	106	59.33333333	0	0	0	0	0	0	0	0	0	≥25	0	0	Female	20-39 years	Non-Hispanic White	High School	Widowed/Divorced/Separated	2	Current	3840	High activity
54910	1	82	87.7	67	10	15	20	4.2	9.7	3.3	89	4.94	6.39	38.34	5.8	115	71	1.6	0.8	3.7	213	1.3	0	0.2115	2409.5	2009-2010	120.6666667	84.66666667	0	0	0	0	0	0	0	0	0	<25	0	0	Female	40-59 years	Other Hispanic	High School	Widowed/Divorced/Separated	2	Current	360	Low activity
54913	2	86	98.4	124	36	16	18	3.7	9.1	3	83	4.607	18.73	112.38	5.6	0	61	2.9	0.5	6	249	2.7	0	0.049	2622	2009-2010	127.3333333	78	0	0	0	1	1	1	0	0	1	≥25	1	0	Female	40-59 years	Mexican American	Middle school or lower	Married or living with a partner	1	Never	0	Inactive
54923	1	85	140.7	205	27	36	30	4	9.3	3.8	104	5.773	47.13	282.78	5.9	99	36	2.2	0.6	3.5	239	4.9	16.8	0.327	2376.5	2009-2010	141.3333333	73.33333333	0	0	0	1	1	1	0	0	1	≥25	1	1	Male	60 and above years	Mexican American	High School	Married or living with a partner	4	Current	4800	High activity
54941	1	87	89.4	135	11	14	18	4	8.8	2.7	87	4.829	7.21	43.26	4.9	114	49	1.9	0.4	5.7	226	5.2	0	0.0215	1841	2009-2010	96.66666667	32.66666667	0	0	0	0	0	0	0	0	0	≥25	0	0	Female	20-39 years	Non-Hispanic White	High School	Widowed/Divorced/Separated	3	Never	360	Low activity
54950	2	80	91.1	192	16	23	19	4.4	9.7	2.9	91	5.051	11.73	70.38	5.8	90	52	2	0.5	3.4	277	7.1	0.8	0.1385	1536.5	2009-2010	117.3333333	79.33333333	0	0	0	0	0	0	0	0	0	<25	0	0	Female	60 and above years	Non-Hispanic White	College or above	Married or living with a partner	4	Current	1620	Low activity
54959	1	84	102.2	45	8	19	22	3.8	8.6	3	88	4.885	9.54	57.24	5.2	88	71	1.9	0.4	4.8	260	20.5	0	0.086	1280.5	2009-2010	90.66666667	56	0	0	0	0	0	0	0	0	0	≥25	0	0	Female	40-59 years	Non-Hispanic White	College or above	Married or living with a partner	3	Never	0	Inactive
54977	1	79	101.1	135	20	29	22	4.7	9.8	3	98	5.44	11.68	70.08	5	89	46	1.9	0.8	3.2	206	40.7	14.9	0.002	2122.5	2009-2010	126.6666667	64.66666667	0	0	0	0	1	1	0	0	0	≥25	0	0	Male	20-39 years	Non-Hispanic White	College or above	Married or living with a partner	3	Never	2400	Medium activity
54983	1	82	97.5	88	17	19	23	3.8	8.7	2.7	103	5.718	8.87	53.22	5.2	107	43	1.7	1	7.3	156	20.9	0	0.256	2054.5	2009-2010	138	64.66666667	0	0	1	0	0	0	0	0	0	<25	0	0	Male	60 and above years	Non-Hispanic White	Middle school or lower	Married or living with a partner	2	Current	0	Inactive
55015	1	86	74.4	94	33	27	29	4.2	9.3	2.5	99	5.495	5.66	33.96	5.5	97	74	2.4	0.6	2.4	250	20.2	0	0.0785	1781.5	2009-2010	107.3333333	63.33333333	0	0	0	0	0	0	0	0	0	<25	0	0	Female	20-39 years	Non-Hispanic White	High School	Married or living with a partner	3	Current	2160	Medium activity
55020	2	81	93.2	112	26	23	27	4.3	9.2	2.6	103	5.718	7.88	47.28	5.6	0	47	2.6	0.7	4.6	198	7.2	0	0.066	3426	2009-2010	140.6666667	89.33333333	0	0	0	0	0	0	0	0	0	≥25	0	0	Male	40-59 years	Non-Hispanic White	High School	Married or living with a partner	3	Never	1440	Low activity
55054	1	79	98.8	238	30	20	18	4.4	9.5	2.2	94	5.218	11.22	67.32	5	61	28	1.3	0.5	2.6	229	3.4	49.65	0.4025	2159.5	2009-2010	114.6666667	74.66666667	0	0	0	0	1	1	0	1	0	≥25	0	0	Male	20-39 years	Non-Hispanic White	College or above	Never Married	3	Current	1400	Low activity
55089	2	78	92.7	114	34	41	41	4.3	9.3	3.5	83	4.607	7.85	47.1	5.4	0	45	2.1	0.5	3.1	187	7.9	52.5	0.239	3660	2009-2010	120	74	0	0	0	0	0	0	0	1	0	≥25	0	0	Male	20-39 years	Other Hispanic	High School	Widowed/Divorced/Separated	1	Never	12320	High activity
55120	2	82	93.6	132	37	23	23	4.5	9.5	2.8	112	6.217	4.36	26.16	5.6	0	51	1.9	0.4	3.2	195	6.5	24.2	0.038	571	2009-2010	154	79.33333333	0	0	0	0	0	0	0	0	0	≥25	0	0	Male	40-59 years	Non-Hispanic Black	Middle school or lower	Widowed/Divorced/Separated	3	Never	160	Low activity
55138	1	78	89	78	16	17	21	3.9	9.5	3.6	100	5.551	15.92	95.52	5.4	106	66	2.4	0.3	2.5	351	21.2	0	0.083	1651.5	2009-2010	125.3333333	74	0	0	0	0	0	0	0	0	0	≥25	0	0	Female	40-59 years	Non-Hispanic Black	College or above	Never Married	3	Never	880	Low activity
55146	2	77	75.2	206	18	27	19	3.9	9.1	3	90	4.996	2.74	16.44	5.2	120	41	2	0.3	1.7	197	6.1	10.6	0.0105	1656	2009-2010	92.66666667	65.33333333	0	0	0	0	0	0	0	0	0	<25	0	0	Female	40-59 years	Other Hispanic	College or above	Never Married	3	Former	15600	High activity
55152	2	77	97.8	114	13	25	23	4.3	9.6	2.6	105	5.829	9.89	59.34	6.1	110	57	2	0.5	2.9	232	4	9.35	0.0045	1306.5	2009-2010	116.6666667	60	0	0	0	0	0	0	0	0	0	≥25	0	0	Female	60 and above years	Non-Hispanic White	Middle school or lower	Married or living with a partner	2	Never	0	Inactive
55155	2	87	88.2	57	23	25	28	4.4	9.7	2.9	76	4.219	14.07	84.42	5.4	0	43	2.6	0.3	5.6	220	16.9	0	0	3452	2009-2010	122	87.33333333	0	0	0	0	0	0	0	0	0	≥25	0	0	Male	20-39 years	Non-Hispanic Black	High School	Never Married	1	Never	6720	High activity
55170	2	84	103.7	62	21	26	28	4.1	9.6	3.3	89	4.94	13.34	80.04	5.4	123	64	1.9	0.6	2.9	201	3.8	0	0.002	2022.5	2009-2010	120.6666667	76.66666667	0	0	0	0	1	1	0	0	0	≥25	0	0	Female	40-59 years	Other Race-Including Multi-Racial	College or above	Never Married	4	Never	9840	High activity
55182	1	85	77.8	85	9	15	20	3.2	8.8	3.2	71	3.941	2.97	17.82	5.1	86	64	1.9	0.6	4.8	246	14.7	0	0.0215	1547.5	2009-2010	91.33333333	52	0	0	0	0	0	0	0	0	0	<25	0	0	Female	20-39 years	Other Race-Including Multi-Racial	College or above	Married or living with a partner	3	Never	360	Low activity
55190	2	77	88.2	79	16	13	16	3.9	9	2.6	98	5.44	7.86	47.16	5.5	100	69	2.1	0.9	4.2	300	16.2	0	0.0525	1137	2009-2010	93.33333333	54.66666667	0	0	0	0	0	0	0	0	0	≥25	0	0	Female	40-59 years	Other Race-Including Multi-Racial	High School	Widowed/Divorced/Separated	2	Never	1200	Low activity
55193	3	86	89	214	18	19	21	4.3	9.5	3.7	100	5.551	11.1	66.6	5.8	188	49	1.9	0.6	4	323	9.4	0	0.1615	1758.5	2009-2010	120	72.66666667	0	0	0	0	0	0	0	0	0	<25	0	0	Male	60 and above years	Other Hispanic	Middle school or lower	Married or living with a partner	2	Current	4800	High activity
55202	1	76	117.2	109	29	23	24	4.3	9.4	3	134	7.438	18.76	112.56	6.6	200	47	1.6	0.5	4.4	298	5.7	0	0.0045	1706.5	2009-2010	140	75.33333333	1	0	0	1	1	1	0	0	1	≥25	1	1	Female	60 and above years	Non-Hispanic White	High School	Married or living with a partner	2	Never	0	Inactive
55212	1	80	104.9	192	13	19	23	4.6	9.9	3.3	135	7.494	10.79	64.74	6.4	260	40	2.6	0.5	4.5	221	5.8	0	0.26	1840	2009-2010	130	66	1	0	0	0	1	1	0	0	0	≥25	0	1	Male	60 and above years	Non-Hispanic White	High School	Married or living with a partner	2	Never	0	Inactive
55223	2	83	100	225	21	16	23	4.1	9.8	2.4	63	3.497	74.64	447.84	5.4	0	41	2.3	0.5	5.9	214	9.3	0	0.4575	2814	2009-2010	119.3333333	70	1	0	0	1	1	1	0	0	1	≥25	1	1	Female	40-59 years	Non-Hispanic White	High School	Widowed/Divorced/Separated	1	Current	0	Inactive
55234	1	86	115.2	184	22	25	25	3.6	9.1	3.6	266	14.766	12.97	77.82	10.9	0	61	1.6	0.5	3.8	399	82	0	0.0535	1490	2009-2010	114	72.66666667	1	0	0	1	1	1	0	0	1	≥25	1	1	Female	40-59 years	Mexican American	Middle school or lower	Married or living with a partner	2	Never	0	Inactive
55249	2	75	95.5	91	16	23	25	4.4	9.2	3.1	87	4.829	2.91	17.46	5.2	82	50	2.4	0.5	3.6	226	0.6	109.25	0.1655	3517	2009-2010	127.3333333	72	0	0	0	0	0	0	0	1	0	≥25	0	0	Male	20-39 years	Non-Hispanic White	College or above	Married or living with a partner	3	Current	21600	High activity
55259	1	82	104.7	107	31	14	27	3.8	9.2	3.4	91	5.051	7.65	45.9	5.2	91	60	1.7	0.7	2.2	343	7.3	0	0.112	1523.5	2009-2010	106	54.66666667	0	0	0	0	1	1	0	0	0	≥25	0	0	Female	60 and above years	Non-Hispanic White	Middle school or lower	Widowed/Divorced/Separated	2	Never	0	Inactive
55265	1	88	99.4	171	13	19	24	4	9.2	3.2	99	5.495	7.25	43.5	5.6	142	54	1.8	0.3	4.1	253	4.6	0	0.077	2394.5	2009-2010	123.3333333	69.33333333	0	0	0	0	1	1	0	0	0	≥25	0	0	Female	40-59 years	Mexican American	Middle school or lower	Married or living with a partner	2	Former	3840	High activity
55279	2	80	91.2	46	12	23	29	4.3	9.7	2.5	93	5.162	7.35	44.1	5.5	83	102	2.1	0.5	1.3	208	3.1	0	0.002	2566	2009-2010	150	84.66666667	0	0	0	0	0	0	0	0	0	≥25	0	0	Female	40-59 years	Non-Hispanic Black	High School	Married or living with a partner	3	Current	26760	High activity
55281	1	84	88.3	50	22	12	16	4	9.4	3.6	96	5.329	3.47	20.82	5.9	132	68	1.9	0.4	3.9	349	8.7	0	0.078	1825	2009-2010	103.3333333	31.33333333	0	0	0	0	0	0	0	0	0	≥25	0	0	Female	60 and above years	Non-Hispanic Black	High School	Widowed/Divorced/Separated	2	Current	360	Low activity
55305	1	75	118.5	75	29	34	22	4.4	9.8	3.4	108	5.995	21.81	130.86	5.8	154	40	2.5	0.7	4.4	202	19.9	168.5	0.284	2639	2009-2010	129.3333333	74	0	0	0	1	1	1	0	1	0	≥25	1	0	Male	20-39 years	Other Hispanic	High School	Never Married	4	Current	720	Low activity
55316	1	82	111.7	71	13	27	24	4.2	9	1.9	105	5.829	9.03	54.18	5.5	121	44	1.2	0.4	2	182	4.3	18.8	0.4965	2769.5	2009-2010	114.6666667	68	0	0	0	0	1	1	0	0	0	≥25	0	0	Male	40-59 years	Non-Hispanic White	College or above	Married or living with a partner	3	Never	3840	High activity
55359	2	78	67.6	48	9	13	17	4.4	9.4	2.9	70	3.886	3.96	23.76	5.1	71	54	2.6	0.4	5.2	160	4.4	0	0	4303.5	2009-2010	92.66666667	44	0	0	0	0	0	0	0	0	0	<25	0	0	Male	20-39 years	Non-Hispanic Black	High School	Married or living with a partner	1	Current	360	Low activity
55369	2	83	94	66	12	27	24	4	9	2.8	87	4.829	6.54	39.24	5.3	97	50	1.7	0.6	6.4	321	33.2	0	0.1365	1156.5	2009-2010	126	82.66666667	0	0	0	0	0	0	0	0	0	≥25	0	0	Female	40-59 years	Non-Hispanic White	College or above	Married or living with a partner	3	Current	1800	Medium activity
55381	2	79	83.3	52	26	17	16	4	9.3	2.7	93	5.162	10.2	61.2	5.4	0	72	2.5	0.5	3.8	300	2.4	0	0.284	457	2009-2010	114	80	0	0	0	0	0	0	0	0	0	<25	0	0	Female	20-39 years	Non-Hispanic Black	Middle school or lower	Married or living with a partner	2	Never	0	Inactive
55390	1	77	68.6	57	17	13	22	4.4	9.8	3.2	87	4.829	8.7	52.2	5.2	103	61	1.8	0.3	2.4	225	6.1	0	0.271	3285	2009-2010	108.6666667	70	0	0	0	0	0	0	0	0	0	<25	0	0	Female	20-39 years	Non-Hispanic White	High School	Never Married	2	Never	720	Low activity
55392	1	87	110.5	213	23	14	21	4.3	9.6	3.4	100	5.551	19.24	115.44	5.4	136	47	1.8	0.4	3.1	197	6.9	0	0.031	805.5	2009-2010	168.6666667	76	0	0	0	1	1	1	0	0	1	≥25	1	1	Female	60 and above years	Non-Hispanic White	High School	Married or living with a partner	1	Current	380	Low activity
55395	2	76	86.4	83	103	22	30	4.4	10.1	2.8	134	7.438	14.9	89.4	7.5	0	76	0.7	0.5	3.9	164	7.8	0	0.0065	1849	2009-2010	151.3333333	46	1	1	1	1	1	1	0	0	1	≥25	1	0	Female	60 and above years	Non-Hispanic White	High School	Married or living with a partner	4	Never	680	Low activity
55398	2	84	92.1	141	24	22	21	4.4	9.3	2.7	105	5.829	10	60	5.1	80	49	1.7	0.5	7	209	15.6	0	0.362	1754	2009-2010	94.66666667	63.33333333	0	0	0	0	0	0	0	0	0	≥25	0	1	Female	40-59 years	Non-Hispanic White	High School	Widowed/Divorced/Separated	2	Current	0	Inactive
55413	1	79	105.2	116	23	22	24	3.8	8.9	2.9	144	7.993	13.41	80.46	6.5	252	45	2.2	0.8	2.2	208	23.7	51.25	0.194	2257	2009-2010	138.6666667	60	1	1	0	1	1	1	0	1	0	≥25	1	1	Male	60 and above years	Non-Hispanic White	High School	Married or living with a partner	3	Never	0	Inactive
55416	2	79	129.4	201	10	16	24	4.2	9.4	3.3	131	7.272	5.8	34.8	7.6	0	44	1.7	0.4	3.8	205	5.8	0	0.2365	1270.5	2009-2010	118	44.66666667	1	1	0	0	1	1	0	0	0	≥25	0	1	Male	60 and above years	Non-Hispanic White	Middle school or lower	Married or living with a partner	4	Current	0	Inactive
55420	1	80	89.2	58	11	23	20	4.3	9.3	2.5	89	4.94	5.79	34.74	5.2	58	57	2.5	0.7	3.3	214	2.8	33.45	0.536	3914.5	2009-2010	107.3333333	70	0	0	0	0	0	0	0	1	0	≥25	0	0	Male	20-39 years	Non-Hispanic White	High School	Never Married	2	Former	5840	High activity
55423	3	86	140	140	18	24	22	4.4	9.4	2.8	117	6.495	20.32	121.92	5.7	121	45	1.5	0.5	4	171	30.6	0	0.2525	898.5	2009-2010	123.3333333	59.33333333	0	1	0	1	1	1	0	0	1	≥25	1	1	Male	60 and above years	Mexican American	Middle school or lower	Married or living with a partner	4	Current	360	Low activity
55441	1	77	82.7	38	7	14	19	4.2	9.5	2.6	89	4.94	3.02	18.12	5.4	0	79	2	0.5	3.2	241	4.2	9.35	0.101	2044	2009-2010	100	76	0	0	0	0	0	0	0	0	0	<25	0	0	Female	40-59 years	Non-Hispanic White	College or above	Married or living with a partner	1	Never	1620	Low activity
55451	1	83	95.1	95	21	53	43	4.3	9.3	2.9	105	5.829	13.33	79.98	4.4	58	50	1.3	0.4	2.6	205	3.2	16.75	0.1255	1972	2009-2010	140.6666667	86	0	0	0	0	0	0	0	0	0	≥25	0	0	Male	40-59 years	Non-Hispanic White	Middle school or lower	Married or living with a partner	1	Current	3840	High activity
55455	1	86	99.2	76	29	20	22	4.4	9.2	3.1	101	5.607	6.52	39.12	5.3	79	83	1.4	0.4	1.7	221	4	27.85	0.306	2075	2009-2010	114	54	0	0	0	0	0	0	0	0	0	≥25	0	0	Male	20-39 years	Non-Hispanic White	College or above	Married or living with a partner	4	Never	6480	High activity
55456	2	88	91.2	68	14	26	28	4.7	9.7	2.9	90	4.996	9.54	57.24	5.2	80	65	1.6	0.6	4.5	184	3.6	14.05	0.0635	2346.5	2009-2010	106.6666667	57.33333333	0	0	0	0	0	0	0	0	0	≥25	0	0	Male	20-39 years	Mexican American	High School	Married or living with a partner	2	Never	480	Low activity
55466	2	80	120.4	106	16	22	22	4.5	9	2.2	103	5.718	18.71	112.26	5.4	48	40	1.4	0.5	3.5	219	9.1	14	0.1125	2005.5	2009-2010	96	55.33333333	0	0	0	1	1	1	0	0	1	≥25	1	0	Male	60 and above years	Non-Hispanic White	Middle school or lower	Widowed/Divorced/Separated	2	Current	2580	Medium activity
55472	2	79	79.1	68	18	20	31	4.7	9.4	2.6	81	4.496	4.44	26.64	5.2	62	64	1.6	0.5	1.9	257	21.3	5.6	0.101	2257.5	2009-2010	111.3333333	42.66666667	0	0	0	0	0	0	0	0	0	<25	0	0	Male	20-39 years	Non-Hispanic White	High School	Never Married	3	Current	7680	High activity
55487	1	86	80	73	11	18	19	4	9.2	2.9	92	5.107	9.91	59.46	5	87	50	2.5	0.6	5.7	243	7.1	0	0.0665	1183.5	2009-2010	110	66.66666667	0	0	0	0	0	0	0	0	0	≥25	0	0	Female	20-39 years	Other Hispanic	High School	Married or living with a partner	1	Current	960	Low activity
55493	2	86	95.5	169	9	25	22	4.6	9.5	3.3	134	7.438	13.51	81.06	5.8	0	39	2	0.3	2.3	202	20.7	0	0.1435	1710	2009-2010	112.6666667	69.33333333	1	0	0	0	0	0	0	0	0	≥25	0	1	Male	20-39 years	Mexican American	Middle school or lower	Married or living with a partner	1	Never	5200	High activity
55496	1	79	118	73	16	8	19	3.9	8.9	3.1	123	6.828	8.81	52.86	6.4	152	49	1.3	0.5	4	119	109.7	0	0.0745	2226	2009-2010	104.6666667	48.66666667	0	1	1	1	1	1	0	0	1	≥25	1	1	Male	60 and above years	Non-Hispanic White	College or above	Married or living with a partner	4	Never	0	Inactive
55508	2	87	79	79	165	56	37	4.1	9.4	2.7	83	4.607	3.22	19.32	5.4	73	90	1.7	0.5	4.9	260	4.5	0	0.41	4011.5	2009-2010	104	63.33333333	0	0	0	0	0	0	0	0	0	<25	0	0	Male	40-59 years	Non-Hispanic White	High School	Widowed/Divorced/Separated	2	Current	2400	Medium activity
55515	1	83	111.6	122	28	18	17	4.1	9.4	2.7	107	5.94	19.79	118.74	5.9	105	45	1.4	0.5	5.1	353	13	0	0.2115	3244	2009-2010	119.3333333	85.33333333	0	0	0	1	1	1	0	0	1	≥25	1	0	Male	20-39 years	Non-Hispanic White	Middle school or lower	Married or living with a partner	3	Current	2100	Medium activity
55522	1	80	91.1	105	15	21	20	4.5	9.3	2.4	100	5.551	9.16	54.96	5.3	89	55	1.5	0.8	4	267	1.3	0	0.1345	3220.5	2009-2010	132.6666667	77.33333333	0	0	0	0	0	0	0	0	0	≥25	0	0	Male	20-39 years	Non-Hispanic White	High School	Never Married	2	Former	240	Low activity
55524	1	77	78.3	151	17	16	26	4.1	9.3	3.2	101	5.607	4.83	28.98	5.8	0	84	2.1	0.5	4	243	22	0	0.175	780	2009-2010	132.6666667	52	0	0	0	0	0	0	0	0	0	<25	0	0	Female	60 and above years	Non-Hispanic White	High School	Married or living with a partner	3	Never	0	Inactive
55559	1	75	94.3	105	41	16	19	3.8	8.8	3.2	82	4.552	3.24	19.44	5.6	110	63	2.3	0.8	7	368	9.3	42.1	0.1395	2411.5	2009-2010	131.3333333	78	0	0	0	0	0	0	0	1	0	≥25	0	0	Male	60 and above years	Mexican American	Middle school or lower	Widowed/Divorced/Separated	1	Never	0	Inactive
55577	2	83	88.6	84	28	24	19	4.1	9	2.6	86	4.774	3.81	22.86	5.2	90	74	1.6	0.3	3.7	319	3.8	46.4	0.03	1675	2009-2010	122	72.66666667	0	0	0	0	0	0	0	1	0	<25	0	0	Female	20-39 years	Non-Hispanic White	Middle school or lower	Widowed/Divorced/Separated	3	Current	4800	High activity
55598	1	80	87.5	61	9	29	29	4.1	9.2	2.7	95	5.273	14.84	89.04	5.6	84	65	1.6	0.5	3.8	228	1.2	0	0.4655	2563	2009-2010	120.6666667	74	0	0	0	0	0	0	0	0	0	≥25	0	0	Female	40-59 years	Non-Hispanic White	High School	Married or living with a partner	4	Current	400	Low activity
55639	2	76	100.6	114	22	19	22	4.2	9.6	2.8	97	5.384	11.93	71.58	5.4	117	72	2	0.6	3.6	197	3.1	0	0.32	1215	2009-2010	122.6666667	73.33333333	0	0	0	0	0	0	0	0	0	≥25	0	0	Male	20-39 years	Non-Hispanic White	High School	Never Married	4	Current	2880	Medium activity
55660	1	77	97.5	40	15	16	20	4.3	9.3	2.4	86	4.774	1	6	5.3	86	55	1.6	0.5	4.5	222	7	22.3	0	3203.5	2009-2010	120.6666667	66.66666667	0	0	0	0	0	0	0	0	0	≥25	0	0	Male	20-39 years	Non-Hispanic White	High School	Never Married	4	Current	25980	High activity
55662	1	77	120.3	100	78	27	22	4.4	9.2	2.9	161	8.937	14.23	85.38	7.3	322	58	2	0.5	2.6	183	7.9	7	0.3725	2506.5	2009-2010	118.6666667	63.33333333	1	1	0	1	1	1	0	0	1	≥25	1	1	Male	60 and above years	Non-Hispanic White	College or above	Married or living with a partner	4	Current	3360	Medium activity
55676	2	77	81.6	83	17	18	28	4.6	9.5	3.2	90	4.996	17.13	102.78	5.1	0	59	1.5	0.5	3.1	292	6.7	0	NA	0	2009-2010	108	68	0	0	0	0	0	0	0	0	0	<25	0	0	Male	20-39 years	Non-Hispanic White	High School	Never Married	4	Current	18000	High activity
55692	1	75	91.7	141	25	41	27	4.4	9.4	3.1	100	5.551	18.52	111.12	5.5	111	33	2	0.9	3.2	290	9.3	0	0.0715	2591	2009-2010	106.6666667	55.33333333	0	0	0	1	0	1	0	0	1	≥25	1	0	Male	20-39 years	Mexican American	High School	Married or living with a partner	2	Current	19200	High activity
55709	2	83	91.3	48	22	14	18	4.2	9.6	2.8	101	5.607	5.9	35.4	5.6	73	45	2.4	0.4	2.7	215	3.9	16.25	0.6435	2632	2009-2010	116.6666667	65.33333333	0	0	0	0	0	0	0	0	0	<25	0	0	Male	60 and above years	Non-Hispanic Black	High School	Married or living with a partner	4	Current	0	Inactive
55770	1	81	130.5	64	29	21	24	4	8.8	3.4	94	5.218	14.35	86.1	5.4	82	71	2	0.5	3.2	215	9.2	0	0.313	1405.5	2009-2010	116	59.33333333	0	1	0	1	1	1	0	0	1	≥25	1	0	Female	40-59 years	Mexican American	Middle school or lower	Widowed/Divorced/Separated	2	Never	0	Inactive
55774	1	78	93.8	67	31	28	30	4.2	9.6	3.5	91	5.051	13.38	80.28	5.4	115	55	2.3	0.5	1.4	244	4.5	0	0.012	1358	2009-2010	105.3333333	74.66666667	0	0	0	0	0	0	0	0	0	≥25	0	0	Female	40-59 years	Non-Hispanic Black	High School	Never Married	3	Never	1920	Medium activity
55779	2	88	101.3	139	37	15	24	4.4	9.4	3.3	71	3.941	19.05	114.3	5.4	0	61	1.5	0.3	2.5	168	132	0	0.0025	1110.5	2009-2010	120.6666667	72	0	0	0	1	1	1	0	0	1	≥25	1	0	Female	60 and above years	Mexican American	Middle school or lower	Married or living with a partner	2	Never	4560	High activity
55780	2	75	104.9	362	16	15	18	4	9.9	3.5	111	6.162	30.89	185.34	5.8	167	36	2.6	0.7	5.2	249	1.7	0	0.119	1876	2009-2010	128.6666667	52	0	0	0	1	1	1	0	0	1	≥25	1	1	Female	60 and above years	Non-Hispanic White	Middle school or lower	Married or living with a partner	2	Current	0	Inactive
55788	2	83	104.7	149	23	21	24	4.3	9.7	3	101	5.607	23.63	141.78	6	0	48	2.7	0.4	3.9	325	9.4	0	0.422	1961	2009-2010	126	67	0	0	0	1	1	1	0	0	1	≥25	1	1	Female	20-39 years	Non-Hispanic White	College or above	Never Married	2	Never	2880	Medium activity
55800	2	83	80.1	74	20	12	19	3.6	9.1	2.7	106	5.884	50.83	304.98	4.6	0	73	1.7	0.5	3.4	188	37.5	0	0.0875	1391	2009-2010	109.3333333	64	0	0	0	1	0	1	0	0	1	<25	1	0	Male	60 and above years	Non-Hispanic Black	High School	Widowed/Divorced/Separated	1	Never	0	Inactive
55818	2	80	97.5	371	27	21	25	4.1	9.2	2.7	103	5.718	8.2	49.2	5.1	92	28	1.7	0.4	5.2	194	6.8	0	0.251	2552	2009-2010	118.6666667	69.33333333	0	0	0	0	1	1	0	0	0	≥25	0	0	Male	20-39 years	Non-Hispanic White	Middle school or lower	Married or living with a partner	1	Current	3600	High activity
55849	2	80	129	260	32	23	27	4.5	10.2	2.4	102	5.662	8.33	49.98	7	0	39	2	0.8	6.5	433	5.3	11.15	0.102	1694.5	2009-2010	124.6666667	72.66666667	1	0	0	1	1	1	0	0	1	≥25	1	1	Male	40-59 years	Non-Hispanic White	High School	Widowed/Divorced/Separated	3	Current	1260	Low activity
55859	1	75	103	150	51	40	28	4.4	9	3.2	102	5.662	28.88	173.28	5.2	50	56	2.1	0.6	3.1	298	4.6	0	0.1375	2564	2009-2010	108.6666667	80	0	0	0	1	1	1	0	0	1	≥25	1	0	Male	40-59 years	Mexican American	Middle school or lower	Married or living with a partner	1	Former	0	Inactive
55864	2	77	88.6	90	17	23	29	4.4	9.6	3.3	107	5.94	10.53	63.18	5.6	194	44	2.6	0.7	3.5	248	2.4	0	0.0725	1608.5	2009-2010	114.6666667	66.66666667	1	0	0	0	0	0	0	0	0	≥25	0	1	Female	40-59 years	Mexican American	Middle school or lower	Married or living with a partner	2	Never	720	Low activity
55884	1	79	105.1	262	14	20	22	4.4	9.5	2.9	100	5.551	8.04	48.24	5.6	104	55	1.9	0.4	1.9	256	4	3.3	0.091	1912	2009-2010	117.3333333	80.66666667	0	0	0	0	1	1	0	0	0	≥25	0	0	Female	40-59 years	Non-Hispanic White	High School	Married or living with a partner	4	Never	360	Low activity
55885	2	77	97.5	173	41	29	24	4.4	9.4	3.6	138	7.66	21.46	128.76	6.4	182	37	2.9	0.5	3.1	232	4.3	27.85	0.1085	1048.5	2009-2010	111.3333333	66.66666667	1	0	0	1	1	1	0	1	0	≥25	1	1	Female	40-59 years	Other Race-Including Multi-Racial	Middle school or lower	Married or living with a partner	2	Current	1200	Low activity
55896	1	89	100.2	111	74	20	20	4.7	10.4	2.4	95	5.273	9.51	57.06	5.4	0	64	1.7	0.5	2.8	210	16.7	28.1	0.069	1267	2009-2010	138.6666667	96.66666667	0	0	0	0	1	1	0	0	0	≥25	0	0	Male	40-59 years	Non-Hispanic Black	High School	Married or living with a partner	2	Former	24000	High activity
55927	2	75	98.3	161	18	22	21	4.7	9.4	3.3	106	5.884	23.2	139.2	5.6	209	45	2.5	0.5	3.4	230	2.8	0	0.3035	1920	2009-2010	110	64	1	0	0	1	0	1	0	0	1	≥25	1	1	Female	40-59 years	Non-Hispanic White	High School	Married or living with a partner	2	Never	480	Low activity
55941	1	88	104.5	206	62	25	19	3.7	9.3	3.5	242	13.433	8.4	50.4	8.3	0	96	1.7	0.3	2.4	136	20.5	7.55	0.0235	1323	2009-2010	155.3333333	73.33333333	1	1	0	1	1	1	0	0	1	≥25	1	1	Female	60 and above years	Non-Hispanic Black	High School	Widowed/Divorced/Separated	3	Current	400	Low activity
55942	2	84	135.3	64	23	15	21	3.9	9.2	3.6	89	4.94	65.76	394.56	6.1	129	54	3.2	0.5	5.3	309	8.6	0	0.4915	2641.5	2009-2010	135.3333333	80.66666667	0	0	0	1	1	1	0	0	1	≥25	1	0	Female	20-39 years	Non-Hispanic Black	College or above	Married or living with a partner	3	Never	240	Low activity
55965	1	82	94.5	108	17	16	22	4.9	9.8	3.2	146	8.104	11.97	71.82	6	0	41	1.9	0.4	4.5	288	43.5	0	0	2513	2009-2010	122	80	1	0	0	0	0	0	0	0	0	≥25	0	1	Female	60 and above years	Non-Hispanic Black	High School	Never Married	2	Never	720	Low activity
55966	1	85	69.5	83	10	26	34	4.3	9.3	2.9	93	5.162	3.52	21.12	5.9	110	102	1.5	0.3	4.6	244	4	0	0.0065	1973.5	2009-2010	100	69	0	0	0	0	0	0	0	0	0	<25	0	0	Female	60 and above years	Non-Hispanic White	College or above	Married or living with a partner	4	Never	1040	Low activity
55967	2	82	97.4	56	26	19	21	4.7	9.5	2.3	104	5.773	23.67	142.02	5.2	134	66	2	0.5	2.9	230	3.1	0	0.1345	3552	2009-2010	122.6666667	87.33333333	0	0	0	1	0	1	0	0	1	≥25	1	0	Male	40-59 years	Other Hispanic	Middle school or lower	Married or living with a partner	2	Never	3840	High activity
55993	1	85	89.1	235	13	21	24	4.4	9.7	2.8	102	5.662	8.87	53.22	5.5	0	48	1.9	0.7	2.9	199	2.5	0	0.0075	1391.5	2009-2010	128	59.33333333	0	0	0	0	0	0	0	0	0	<25	0	1	Female	60 and above years	Non-Hispanic White	High School	Married or living with a partner	4	Never	6000	High activity
55996	2	88	92.2	162	27	22	20	4.1	8.9	2.7	106	5.884	21.88	131.28	5.4	184	36	2.5	0.4	3.6	242	11.5	0	0.0235	1605	2009-2010	127.3333333	71.33333333	0	0	0	1	0	1	0	0	1	≥25	1	1	Female	40-59 years	Mexican American	Middle school or lower	Married or living with a partner	2	Never	0	Inactive
55998	1	88	85	82	13	14	25	4.2	9.3	2.7	83	4.607	3.83	22.98	5.8	132	67	1.2	0.4	2.8	410	7.1	0	0.0795	856	2009-2010	144.6666667	52	0	0	0	0	0	0	0	0	0	<25	0	0	Female	60 and above years	Non-Hispanic White	High School	Widowed/Divorced/Separated	2	Never	1680	Low activity
56031	2	88	140.5	187	19	18	17	3.5	8.8	3.1	99	5.495	35.59	213.54	5.9	74	36	3.7	1.3	8	194	3	0	0.548	1548.5	2009-2010	116	66.66666667	0	1	0	1	1	1	0	0	1	≥25	1	1	Female	40-59 years	Non-Hispanic White	High School	Widowed/Divorced/Separated	1	Current	0	Inactive
56033	1	82	106	198	17	28	25	4.1	9.5	3.1	113	6.273	25.93	155.58	5.8	62	55	2.9	0.3	4.6	202	2.9	0	0.0845	3086	2009-2010	104.6666667	60.66666667	0	0	0	1	1	1	0	0	1	≥25	1	1	Female	20-39 years	Mexican American	High School	Married or living with a partner	1	Never	0	Inactive
56053	1	78	94.9	145	22	22	26	4.6	9.3	2.8	83	4.607	5.9	35.4	5.4	52	55	2.1	0.6	2.8	265	61.4	31.9	0.2355	2334.5	2009-2010	129.3333333	81.33333333	0	0	0	0	0	0	0	1	0	<25	0	0	Male	20-39 years	Non-Hispanic White	College or above	Never Married	4	Never	4320	High activity
56056	2	79	70.7	54	16	27	26	5	10.1	3	89	4.94	5.77	34.62	5.3	94	57	1.7	0.5	4.2	241	4.4	7	0.004	3475	2009-2010	122.6666667	66	0	0	0	0	0	0	0	0	0	<25	0	0	Male	20-39 years	Non-Hispanic Black	High School	Married or living with a partner	4	Never	40320	High activity
56070	1	80	107.2	62	13	18	32	3.8	9.4	4.3	102	5.662	17.86	107.16	6	97	43	2.6	0.6	5.7	370	3.4	0	0.3525	3054.5	2009-2010	120	65.33333333	0	0	0	0	1	1	0	0	0	≥25	0	0	Female	20-39 years	Non-Hispanic Black	High School	Married or living with a partner	1	Never	0	Inactive
56078	1	89	96	149	27	15	18	4.1	9.2	2.5	98	5.44	19.49	116.94	5.7	145	44	3	0.6	6.6	302	9.7	0	0.29	2824.5	2009-2010	133.3333333	64.66666667	0	0	0	1	1	1	0	0	1	≥25	1	1	Female	40-59 years	Mexican American	Middle school or lower	Widowed/Divorced/Separated	2	Current	14400	High activity
56079	1	76	99.2	205	10	22	24	3.9	9.7	2.6	133	7.383	9.11	54.66	6.4	0	41	1.5	0.3	4.4	243	5.2	0	0.16	1070.5	2009-2010	116	51	1	0	0	0	0	0	0	0	0	≥25	0	1	Female	60 and above years	Non-Hispanic White	High School	Married or living with a partner	3	Current	120	Low activity
56087	2	80	78.4	146	19	13	18	4.5	9.4	3	98	5.44	11.13	66.78	5.6	75	36	2.4	0.6	9.7	250	7.5	0	0.0045	3558	2009-2010	112.6666667	69.33333333	0	0	0	0	0	0	0	0	0	<25	0	0	Male	20-39 years	Non-Hispanic White	Middle school or lower	Married or living with a partner	1	Current	7680	High activity
56096	2	81	121	167	42	98	46	4.3	9	2.8	119	6.606	82.23	493.38	5.3	0	43	1.6	0.5	3.2	168	11.1	11.15	0.231	2710	2009-2010	132.6666667	88.66666667	0	0	0	1	1	1	0	0	1	≥25	1	1	Male	40-59 years	Non-Hispanic White	High School	Married or living with a partner	3	Never	3240	Medium activity
56114	1	84	142.1	77	16	18	22	4.3	9.5	3.2	105	5.829	47.14	282.84	5.4	156	37	1.4	0.7	7.1	211	20.3	0.1	0.162	2136	2009-2010	118	57.33333333	0	0	0	1	1	1	1	0	0	≥25	1	1	Male	40-59 years	Other Race-Including Multi-Racial	High School	Widowed/Divorced/Separated	2	Current	4620	High activity
56122	2	84	82	194	14	12	18	3.2	9.3	2.1	97	5.384	15.03	90.18	5.1	85	37	3.6	0.6	4.6	282	10.2	20.95	0.005	1747	2009-2010	119.3333333	70.66666667	0	0	0	0	0	0	0	1	0	<25	0	0	Female	20-39 years	Non-Hispanic White	High School	Never Married	2	Never	2240	Medium activity
56126	1	79	92.4	114	58	35	26	4.5	11	2.4	78	4.33	3.85	23.1	5.5	135	72	2.2	0.7	6.5	322	21.6	0	0.083	1808	2009-2010	127.3333333	88	0	0	0	0	1	1	0	0	0	≥25	0	0	Female	40-59 years	Other Race-Including Multi-Racial	College or above	Married or living with a partner	2	Current	0	Inactive
56147	2	76	100.8	104	12	22	22	4.2	9.2	2.4	95	5.273	8.47	50.82	5.3	130	57	1.2	0.3	2.2	247	20.8	0	0.4535	1369.5	2009-2010	117.3333333	68.66666667	0	0	0	0	1	1	0	0	0	≥25	0	0	Female	60 and above years	Non-Hispanic White	High School	Married or living with a partner	3	Never	720	Low activity
56193	2	85	99.4	62	13	17	19	4.3	9.4	3.1	89	4.94	8.04	48.24	4.7	81	48	1	0.3	4.2	128	3.1	0.4	0.024	3506.5	2009-2010	105.3333333	54.66666667	0	0	0	0	0	0	0	0	0	≥25	0	0	Female	20-39 years	Mexican American	High School	Never Married	4	Never	280	Low activity
56195	1	85	100.4	78	15	17	18	4.2	9.2	3	98	5.44	12.53	75.18	5.8	106	44	2.3	0.4	4.1	139	19.9	0	0.0835	1577	2009-2010	120	69	0	0	0	0	0	0	0	0	0	≥25	0	0	Female	40-59 years	Other Race-Including Multi-Racial	High School	Married or living with a partner	3	Never	0	Inactive
56198	1	81	78.8	61	20	18	19	4.1	9.1	3.1	74	4.108	4.31	25.86	5.4	0	69	1.1	0.6	2.7	220	0.3	0	0.0085	1590.5	2009-2010	140	80.66666667	0	0	0	0	0	0	0	0	0	<25	0	0	Female	40-59 years	Non-Hispanic White	College or above	Married or living with a partner	3	Never	540	Low activity
56206	1	83	105.5	67	28	13	20	4.2	8.8	2.5	112	6.217	26.39	158.34	5.6	93	46	2.2	0.6	5.5	304	2.9	0	0.3015	4551	2009-2010	114.6666667	60	0	0	0	1	0	1	0	0	1	≥25	1	1	Male	40-59 years	Non-Hispanic White	High School	Married or living with a partner	2	Current	12000	High activity
56213	2	87	118.5	257	72	68	44	4.2	9.3	2.9	89	4.94	25.26	151.56	4.6	0	40	3.7	0.8	3.8	262	5.6	0	0.067	2861.5	2009-2010	107.3333333	76	0	0	0	1	1	1	0	0	1	≥25	1	0	Male	20-39 years	Other Race-Including Multi-Racial	High School	Never Married	3	Current	3120	Medium activity
56221	1	86	73.5	68	14	21	26	3.9	9.4	3.6	116	6.439	8.05	48.3	5.4	87	57	1.3	0.4	3.2	205	5.2	0	0.947	1380	2009-2010	162.6666667	74	0	0	0	0	0	0	1	0	0	<25	0	0	Male	60 and above years	Other Race-Including Multi-Racial	College or above	Married or living with a partner	1	Current	1680	Low activity
56230	3	86	81	74	9	10	19	4.4	9.4	3	69	3.83	17.56	105.36	5.4	0	66	1.9	0.3	2.3	280	61.3	0	0.0115	2030	2009-2010	104	62	0	0	0	0	0	0	0	0	0	<25	0	0	Female	20-39 years	Other Hispanic	College or above	Never Married	4	Never	720	Low activity
56231	2	86	80.9	34	9	20	24	4.4	9.1	2.5	81	4.496	6.87	41.22	4.8	54	90	1.7	0.5	2.8	190	9.1	18.55	0.0925	2631.5	2009-2010	102.6666667	60.66666667	0	0	0	0	0	0	0	0	0	<25	0	0	Female	40-59 years	Mexican American	College or above	Widowed/Divorced/Separated	4	Never	0	Inactive
56244	2	82	76.5	61	11	10	19	3.9	9.2	2.9	83	4.607	8.11	48.66	5.3	70	58	1.9	0.3	4.2	280	0.4	0	0.127	1411.5	2009-2010	103.3333333	64.66666667	0	0	0	0	0	0	0	0	0	<25	0	0	Female	20-39 years	Other Hispanic	College or above	Married or living with a partner	4	Never	3780	High activity
56253	1	83	87.8	52	14	16	19	3.8	8.9	3.8	101	5.607	6.42	38.52	5.4	95	35	1.5	0.3	2.2	183	2.2	0	0.0035	3142.5	2009-2010	113.3333333	72	0	0	0	0	0	0	0	0	0	≥25	0	0	Male	20-39 years	Other Hispanic	High School	Married or living with a partner	4	Never	7200	High activity
56265	1	76	103	96	56	37	27	4.7	9.7	2.3	107	5.94	12.35	74.1	6	137	57	1.3	0.3	2.6	175	5.5	0	0.072	2477.5	2009-2010	110	71	0	0	0	1	1	1	0	0	1	≥25	1	0	Female	40-59 years	Non-Hispanic White	High School	Married or living with a partner	4	Never	2640	Medium activity
56283	2	82	89.1	166	15	22	27	4.7	9.9	3.2	107	5.94	8.79	52.74	5.9	160	58	1.9	0.4	3.3	268	4.7	0	0.065	401	2009-2010	135.3333333	67.33333333	0	0	0	0	0	0	0	0	0	≥25	0	1	Female	60 and above years	Other Hispanic	Middle school or lower	Widowed/Divorced/Separated	3	Never	2400	Medium activity
56292	1	83	86.1	35	10	18	21	4.3	9.5	2.3	89	4.94	5.27	31.62	5.2	70	76	1.1	0.4	3.7	307	1.5	11.15	0.246	1932.5	2009-2010	98	60.66666667	0	0	0	0	0	0	0	0	0	<25	0	0	Female	40-59 years	Non-Hispanic White	College or above	Married or living with a partner	3	Never	0	Inactive
56308	2	86	97.7	120	12	19	23	3.6	8.9	3.7	82	4.552	10.79	64.74	4	0	50	2.8	0.5	3.1	516	26.5	0	0.0215	2106	2009-2010	117.3333333	62	0	0	0	0	0	0	0	0	0	≥25	0	0	Female	40-59 years	Mexican American	Middle school or lower	Widowed/Divorced/Separated	1	Never	0	Inactive
56309	2	85	88.3	185	19	14	21	4.6	9.8	2.8	113	6.273	11.17	67.02	5.4	208	79	1.1	0.5	3.1	316	2	28.75	0.302	1960.5	2009-2010	146.6666667	56	1	0	0	0	0	0	0	1	0	<25	0	1	Female	60 and above years	Non-Hispanic White	College or above	Married or living with a partner	3	Never	1180	Low activity
56311	2	80	86	79	17	19	19	4.6	9.4	2.7	121	6.717	49.17	295.02	5.1	128	37	1.4	0.3	2.8	185	6.1	0	0.215	1384	2009-2010	96	66.66666667	0	0	0	1	0	1	0	0	1	<25	1	0	Female	20-39 years	Non-Hispanic White	High School	Never Married	1	Current	2160	Medium activity
56318	2	75	65.3	106	18	26	31	4.7	9.2	2.7	101	5.607	3.16	18.96	6	178	59	0.9	0.5	5.1	192	52.9	0	0	2830	2009-2010	108.6666667	48.66666667	0	0	0	0	0	0	0	0	0	<25	0	0	Female	60 and above years	Non-Hispanic White	High School	Widowed/Divorced/Separated	2	Never	0	Inactive
56348	2	77	94	77	12	21	27	4.3	10.1	3	93	5.162	4.68	28.08	5.9	104	64	1.2	0.5	1.9	157	8.4	0	0.0575	1815	2009-2010	108	69.33333333	0	0	1	0	0	0	0	0	0	<25	0	0	Male	60 and above years	Non-Hispanic White	College or above	Never Married	4	Never	0	Inactive
56357	2	89	78.2	80	35	24	30	4	9.5	3.1	114	6.328	7.65	45.9	5.9	143	84	2	0.4	4.4	296	5.9	0	0.125	934	2009-2010	134	62.66666667	0	0	0	0	0	0	0	0	0	<25	0	0	Female	60 and above years	Non-Hispanic Black	Middle school or lower	Widowed/Divorced/Separated	1	Never	420	Low activity
56372	2	75	83.6	70	16	19	23	4.8	10	3.1	95	5.273	5.52	33.12	5.2	91	50	2.4	0.7	5	316	1.8	0	0.027	2086	2009-2010	116.6666667	40.66666667	0	0	0	0	0	0	0	0	0	<25	0	0	Male	20-39 years	Non-Hispanic White	Middle school or lower	Married or living with a partner	2	Current	23040	High activity
56374	1	86	116.5	222	23	21	18	3.9	9.4	3.7	95	5.273	30.97	185.82	5.8	77	39	2.3	0.4	4.1	299	14.6	0	0.161	1393	2009-2010	102	76	0	0	0	1	1	1	0	0	1	≥25	1	1	Female	20-39 years	Mexican American	Middle school or lower	Married or living with a partner	1	Former	720	Low activity
56382	1	76	100.4	231	28	33	25	4.5	9.2	3.5	133	7.383	18.77	112.62	6.8	0	32	1.8	0.6	3.6	233	11.9	0	0.5135	1612.5	2009-2010	122	80	1	0	0	1	1	1	0	0	1	<25	1	1	Male	60 and above years	Non-Hispanic White	High School	Married or living with a partner	3	Current	360	Low activity
56402	2	82	71.9	46	9	11	15	4.6	9.4	3	99	5.495	8.95	53.7	5.2	79	67	1.4	0.3	4.4	283	3.7	0	0.138	1026	2009-2010	90.66666667	63.33333333	0	0	0	0	0	0	0	0	0	<25	0	0	Female	40-59 years	Other Hispanic	College or above	Married or living with a partner	3	Never	2400	Medium activity
56424	2	85	111.8	104	7	16	16	3.5	9.1	3.2	82	4.552	13.63	81.78	5.4	80	76	2.9	0.6	4.6	255	7.3	0	0.063	2047	2009-2010	91.33333333	60.66666667	0	0	0	0	1	1	0	0	0	≥25	0	0	Female	20-39 years	Mexican American	College or above	Married or living with a partner	4	Never	1040	Low activity
56430	2	77	93.3	49	38	38	26	4.3	9.3	3.4	102	5.662	5.52	33.12	5.5	70	66	2.7	0.7	4	184	12.2	0	0.1925	3077.5	2009-2010	112	65.33333333	0	0	0	0	0	0	0	0	0	≥25	0	0	Male	40-59 years	Other Hispanic	High School	Widowed/Divorced/Separated	3	Never	12960	High activity
56435	2	79	80.2	57	6	22	36	4.4	9.2	2.6	84	4.663	4.44	26.64	5.2	88	72	1.2	0.3	3.1	193	2.6	0	0.188	1462	2009-2010	97.33333333	56	0	0	0	0	0	0	0	0	0	<25	0	0	Female	40-59 years	Non-Hispanic White	College or above	Married or living with a partner	2	Never	1380	Low activity
56455	1	77	105.4	50	13	17	24	4.5	9.6	2.8	101	5.607	6.83	40.98	5.5	127	82	1.3	0.6	3.7	224	4.3	0	0.2295	1568.5	2009-2010	118	58.66666667	0	0	0	0	0	0	0	0	0	≥25	0	0	Male	60 and above years	Non-Hispanic White	High School	Married or living with a partner	4	Current	1840	Medium activity
56479	1	85	112.2	282	34	22	20	4.3	8.9	2.4	104	5.773	26.73	160.38	5.5	202	34	2.6	0.4	4.2	194	3.1	0	0.048	1059	2009-2010	118	62.66666667	1	0	0	1	1	1	0	0	1	≥25	1	1	Male	40-59 years	Mexican American	Middle school or lower	Married or living with a partner	4	Former	3360	Medium activity
56536	1	87	102.4	141	19	19	20	4.6	10	2.8	116	6.439	15.23	91.38	5.9	72	56	1.6	0.3	2.3	231	11.2	0	0.604	1358.5	2009-2010	118.6666667	63.33333333	0	0	0	1	1	1	0	0	1	≥25	1	0	Female	60 and above years	Non-Hispanic White	High School	Married or living with a partner	3	Never	9960	High activity
56546	2	76	112.7	135	31	22	19	4.4	10	2.2	99	5.495	17.14	102.84	5.6	119	38	1.3	0.3	3.7	259	14.1	0	0.3725	2800.5	2009-2010	124.6666667	84	0	0	0	1	1	1	0	0	1	≥25	1	0	Male	20-39 years	Non-Hispanic White	Middle school or lower	Married or living with a partner	3	Never	1440	Low activity
56550	1	83	92	72	20	12	17	3.8	9	3.4	109	6.051	10.99	65.94	5.5	94	46	2.7	0.5	4.7	344	15	22.3	0.049	1120	2009-2010	112	72	0	0	0	0	0	0	0	1	0	<25	0	0	Female	40-59 years	Non-Hispanic Black	Middle school or lower	Widowed/Divorced/Separated	1	Current	960	Low activity
56563	1	86	74.2	45	14	20	20	4.3	9.4	2.5	90	4.996	6.44	38.64	5.3	48	61	1.9	0.4	1.7	143	7.3	0	0.0705	1669.5	2009-2010	102.6666667	72.66666667	0	0	0	0	0	0	0	0	0	<25	0	0	Female	20-39 years	Non-Hispanic White	High School	Married or living with a partner	2	Never	1440	Low activity
56591	1	77	75.5	78	15	18	24	4.5	9.7	2.3	104	5.773	4.91	29.46	5.8	143	81	2	0.5	2.6	177	17.3	0	0.022	1431.5	2009-2010	140.6666667	64.66666667	0	0	0	0	0	0	0	0	0	<25	0	0	Female	60 and above years	Non-Hispanic White	High School	Widowed/Divorced/Separated	3	Never	2640	Medium activity
56592	2	81	64.4	42	13	12	17	4.5	9.9	3.1	95	5.273	7.51	45.06	5.6	101	52	2.4	0.5	2.3	211	33.6	0	0	1729	2009-2010	116	64	0	0	0	0	0	0	0	0	0	<25	0	0	Female	20-39 years	Non-Hispanic Black	College or above	Never Married	2	Never	0	Inactive
56597	2	77	80.1	98	9	26	28	4.6	9	2.4	158	8.771	7.47	44.82	6.3	0	43	1.9	0.5	3.7	292	2.9	25.55	0.3385	3115	2009-2010	108.6666667	63.33333333	1	0	0	0	0	0	0	0	0	<25	0	0	Male	40-59 years	Non-Hispanic White	College or above	Widowed/Divorced/Separated	4	Current	2520	Medium activity
56599	1	75	118.2	279	67	37	23	4.4	9.5	2.6	233	12.934	11.88	71.28	9	0	42	2.4	0.8	7.6	244	2650	0	0.1155	1439.5	2009-2010	136.6666667	75.33333333	1	0	0	1	1	1	0	0	1	≥25	1	1	Male	60 and above years	Other Hispanic	Middle school or lower	Married or living with a partner	3	Never	0	Inactive
56602	2	84	108	75	412	135	296	3.6	9.1	4.4	102	5.662	17.2	103.2	5.3	162	80	1.7	0.4	1.2	124	37.8	42.1	0.0155	2116.5	2009-2010	128	72	0	1	1	1	1	1	1	1	0	≥25	1	0	Female	40-59 years	Non-Hispanic Black	High School	Widowed/Divorced/Separated	2	Current	0	Inactive
56607	2	79	99	52	10	18	16	4.4	9.1	2.4	98	5.44	6.71	40.26	5.2	83	51	2	0.3	2.3	325	6.1	0	0.202	1005.5	2009-2010	102	56	0	0	0	0	0	0	0	0	0	≥25	0	0	Female	20-39 years	Non-Hispanic White	High School	Married or living with a partner	3	Current	800	Low activity
56628	1	85	88.8	88	11	22	24	4.5	8.8	3.4	109	6.051	5.97	35.82	5.9	138	68	1.3	0.3	1.4	168	6.3	0.45	0.0575	2126.5	2009-2010	136	97.33333333	0	0	0	0	0	0	0	0	0	<25	0	0	Female	40-59 years	Other Race-Including Multi-Racial	High School	Married or living with a partner	1	Never	160	Low activity
56633	2	87	81	83	10	17	32	4	9.6	3.5	186	10.325	5.02	30.12	8.6	0	44	1.5	0.5	5	275	9.7	0	0.1095	1881	2009-2010	116	64	1	0	0	0	0	0	0	0	0	<25	0	0	Female	60 and above years	Other Race-Including Multi-Racial	High School	Married or living with a partner	2	Never	3360	Medium activity
56639	2	86	107	118	23	42	23	4.6	8.9	2.7	139	7.716	20.54	123.24	7	0	37	2.5	0.3	3	218	2.7	0	0.051	2843.5	2009-2010	123.3333333	88	1	0	0	1	1	1	0	0	1	≥25	1	1	Male	20-39 years	Mexican American	Middle school or lower	Married or living with a partner	1	Current	5760	High activity
56650	2	85	103.2	122	15	22	23	4.1	9	3.6	97	5.384	10.18	61.08	5.5	225	65	1.4	0.3	2.3	227	3.7	0	0.0645	1952.5	2009-2010	164	75.33333333	1	0	0	0	1	1	0	0	0	≥25	0	1	Female	60 and above years	Mexican American	Middle school or lower	Widowed/Divorced/Separated	1	Never	960	Low activity
56675	1	77	93.6	85	14	24	28	4.2	9.1	2.1	96	5.329	2.66	15.96	5.3	87	84	1.4	0.5	2.2	233	0.9	40.35	0.2445	2340	2009-2010	130	75.33333333	0	0	0	0	0	0	0	1	0	<25	0	0	Female	40-59 years	Non-Hispanic White	College or above	Married or living with a partner	4	Current	5520	High activity
56690	2	75	102.3	106	20	17	19	4.5	9.7	3.1	102	5.662	17.94	107.64	5.6	65	47	2.3	0.7	4	259	2.7	0	0.475	2134	2009-2010	132	60.66666667	0	0	0	1	0	1	0	0	1	<25	1	0	Male	60 and above years	Non-Hispanic White	High School	Married or living with a partner	2	Current	0	Inactive
56720	1	81	98.7	119	35	39	41	4.4	9.1	3.5	116	6.439	18.69	112.14	5.5	0	40	0.5	0.2	6.6	192	69.1	1.1	0.06	1017	2009-2010	118.6666667	74.66666667	0	0	0	1	0	1	1	0	0	≥25	1	1	Female	60 and above years	Mexican American	High School	Married or living with a partner	4	Never	2400	Medium activity
56728	2	75	101.4	76	61	38	34	4.6	9.5	2.8	90	4.996	11.11	66.66	5.6	108	55	3.8	0.6	3.3	176	9.2	0	0.0375	2107	2009-2010	118.6666667	61.33333333	0	0	0	0	1	1	0	0	0	≥25	0	0	Male	20-39 years	Non-Hispanic Black	High School	Married or living with a partner	1	Current	0	Inactive
56766	2	81	117.5	136	58	39	35	4.1	9.7	2.5	167	9.27	60.18	361.08	7.6	0	66	1.3	0.3	3.4	182	291	0	0.0055	2181	2009-2010	168.6666667	60	1	1	0	1	1	1	0	0	1	≥25	1	1	Female	60 and above years	Non-Hispanic White	High School	Married or living with a partner	3	Current	0	Inactive
56767	2	86	89.2	121	27	34	31	4.1	9	3.4	105	5.829	13.57	81.42	5.8	224	80	1.7	0.4	5.6	166	7.1	0	0.0965	1504	2009-2010	171	84	1	0	0	1	0	1	0	0	1	≥25	1	1	Female	60 and above years	Mexican American	Middle school or lower	Married or living with a partner	3	Current	0	Inactive
56798	2	80	138.3	100	17	23	21	4	9.2	2.8	112	6.217	23	138	6	146	43	1.1	0.4	3.9	153	6.2	0	0.4485	1884	2009-2010	138.6666667	70	0	1	0	1	1	1	0	0	1	≥25	1	1	Male	60 and above years	Non-Hispanic White	High School	Married or living with a partner	2	Never	300	Low activity
56812	1	80	119.5	128	45	39	52	3.7	9.1	2.8	110	6.106	16.94	101.64	5.8	0	27	1.2	0.2	2.4	137	11.2	0	0.042	1145.5	2009-2010	134	59.33333333	1	1	1	1	1	1	0	0	1	≥25	1	1	Male	60 and above years	Non-Hispanic White	Middle school or lower	Married or living with a partner	1	Current	240	Low activity
56816	2	83	99.9	29	25	27	25	4.2	9.7	2.8	88	4.885	12.48	74.88	5.7	71	43	1.3	0.4	2.2	235	9	0	0.37	2560	2009-2010	173.3333333	90	0	0	0	0	0	0	0	0	0	≥25	0	0	Male	40-59 years	Non-Hispanic Black	Middle school or lower	Never Married	4	Never	0	Inactive
56824	2	75	122.9	103	24	25	22	4.4	9.5	3.2	177	9.825	39.15	234.9	6.3	0	42	2.4	0.4	3.6	241	23.1	0	0.0775	1260.5	2009-2010	132	79.33333333	1	0	0	1	1	1	0	0	1	≥25	1	1	Male	60 and above years	Non-Hispanic Black	High School	Widowed/Divorced/Separated	4	Current	0	Inactive
56846	1	86	105.9	147	17	24	23	4.4	9.2	2.6	92	5.107	16.48	98.88	5.1	113	31	2.6	0.5	3.6	205	2.8	97.1	0.1735	3885.5	2009-2010	122.6666667	96	0	0	0	0	1	1	0	1	0	≥25	0	1	Male	20-39 years	Non-Hispanic White	High School	Married or living with a partner	4	Never	240	Low activity
56850	1	81	107.5	145	40	73	46	4.5	9.7	3.2	102	5.662	12.92	77.52	5.6	111	38	1.7	0.4	3.9	315	8.3	0	0.1095	2581	2009-2010	121.3333333	75.33333333	0	0	0	1	1	1	0	0	1	≥25	1	0	Male	40-59 years	Mexican American	Middle school or lower	Married or living with a partner	3	Never	1260	Low activity
56868	2	82	114.7	105	8	15	20	3.9	9	3.2	98	5.44	18.5	111	5.7	133	40	2.5	0.7	4.2	249	4.9	0	0.0955	1197	2009-2010	116.6666667	75.33333333	0	0	0	0	1	1	0	0	0	≥25	0	0	Female	20-39 years	Other Hispanic	College or above	Married or living with a partner	2	Never	720	Low activity
56869	2	83	96.5	155	13	8	17	3.6	8.8	2.7	70	3.886	1.71	10.26	7.3	0	33	1.3	0.6	5.6	202	50.8	0	0.006	1472	2009-2010	151.3333333	58.66666667	1	1	0	0	0	0	0	0	0	≥25	0	1	Male	60 and above years	Non-Hispanic White	Middle school or lower	Married or living with a partner	2	Current	0	Inactive
56878	1	76	102.5	70	8	22	22	4.1	9.2	2	103	5.718	5.56	33.36	5.4	94	82	2	0.4	3.8	179	21	18.15	0.2415	2606.5	2009-2010	106.6666667	57.33333333	0	0	0	0	0	0	0	0	0	≥25	0	0	Female	60 and above years	Non-Hispanic White	College or above	Married or living with a partner	4	Never	0	Inactive
56890	1	76	108.1	102	8	12	25	4.6	9.4	2.9	106	5.884	14.92	89.52	6.1	119	53	2.4	0.6	4	292	7	0	0.0075	1567	2009-2010	139.3333333	63.33333333	0	0	0	0	0	0	0	0	0	≥25	0	0	Male	60 and above years	Non-Hispanic White	High School	Married or living with a partner	4	Never	240	Low activity
56904	2	84	83	141	113	41	30	4	9.2	3.7	102	5.662	11.91	71.46	4.5	102	33	3.8	0.4	2.2	235	5	1.1	0.103	5097.5	2009-2010	107.3333333	59.33333333	0	0	0	0	0	0	0	0	0	<25	0	0	Male	20-39 years	Non-Hispanic Black	College or above	Married or living with a partner	3	Never	0	Inactive
56908	1	80	116.1	100	32	16	19	4	9.5	2.8	106	5.884	27.66	165.96	5.5	0	57	1.7	0.6	2.6	306	19.3	0	0.318	2203	2009-2010	109.3333333	66.66666667	0	0	0	1	1	1	0	0	1	≥25	1	0	Female	60 and above years	Non-Hispanic White	Middle school or lower	Widowed/Divorced/Separated	3	Current	1440	Low activity
56913	2	76	92.4	124	12	24	22	3.4	8.5	3.2	85	4.718	12.97	77.82	4.7	62	63	1.3	0.3	2.7	223	8.2	0	0.4705	1872.5	2009-2010	153	91	0	0	0	0	0	0	0	0	0	≥25	0	0	Female	40-59 years	Non-Hispanic Black	College or above	Married or living with a partner	4	Never	240	Low activity
56938	1	83	134.4	157	39	42	32	4.2	9.2	3.4	111	6.162	31.51	189.06	5.8	87	21	2.1	1.3	7.3	295	171.5	22.3	0.569	2325	2009-2010	121.3333333	70.66666667	0	0	0	1	1	1	0	0	1	≥25	1	1	Male	40-59 years	Non-Hispanic White	High School	Married or living with a partner	3	Never	10560	High activity
56957	2	76	100.6	115	27	24	20	4.1	9.2	2.8	104	5.773	15.24	91.44	5	74	36	2.3	0.6	4.4	166	6.3	11.15	0.312	3272.5	2009-2010	126	57.33333333	0	0	0	1	1	1	0	0	1	≥25	1	0	Male	60 and above years	Non-Hispanic White	College or above	Married or living with a partner	4	Current	12000	High activity
56964	1	75	114.1	153	168	41	42	3.8	8.9	3.8	125	6.939	27	162	7	0	74	2	0.5	8.5	202	19.1	0	0	1305.5	2009-2010	135.3333333	52.66666667	1	1	0	1	1	1	0	0	1	≥25	1	1	Female	60 and above years	Mexican American	Middle school or lower	Widowed/Divorced/Separated	1	Never	0	Inactive
56974	1	77	87.9	33	11	16	23	4.3	9.3	2.2	87	4.829	4.37	26.22	5.4	86	68	2.1	0.4	2.7	213	9.1	0.75	0.1335	2247.5	2009-2010	101.3333333	56	0	0	0	0	0	0	0	0	0	≥25	0	0	Female	40-59 years	Non-Hispanic White	High School	Married or living with a partner	1	Current	10600	High activity
57000	1	83	98.5	76	105	38	30	4.6	9.5	2.4	100	5.551	15.09	90.54	5.3	121	108	2	0.7	3.2	207	7.1	38.85	0.1215	1666	2009-2010	152.6666667	72.66666667	0	0	0	1	1	1	0	1	0	≥25	1	0	Male	60 and above years	Non-Hispanic Black	Middle school or lower	Widowed/Divorced/Separated	4	Never	9600	High activity
57028	1	88	115.7	90	105	21	19	4.1	9.4	3.6	159	8.826	30.06	180.36	8	0	66	1.9	0.6	3.9	222	25.3	21.9	0.237	1998.5	2009-2010	156.6666667	86	1	0	0	1	1	1	0	0	1	≥25	1	1	Male	40-59 years	Mexican American	Middle school or lower	Widowed/Divorced/Separated	2	Never	0	Inactive
57050	2	77	115.2	116	23	31	32	4.2	9.4	2.9	126	6.994	14.8	88.8	6.3	0	53	1.3	0.3	2.7	138	4.5	15.9	0.3185	995	2009-2010	146.6666667	68.66666667	1	1	1	1	1	1	0	0	1	≥25	1	1	Male	60 and above years	Other Hispanic	College or above	Married or living with a partner	4	Current	0	Inactive
57054	2	77	78.8	95	19	18	36	4.8	9.4	3.8	102	5.662	4.44	26.64	5.5	107	75	2	0.5	2.2	227	4.2	48.45	0.215	1376.5	2009-2010	109.3333333	72	0	0	0	0	0	0	0	1	0	<25	0	0	Female	40-59 years	Other Race-Including Multi-Racial	High School	Married or living with a partner	4	Current	4800	High activity
57062	1	75	109.1	269	30	23	21	4.5	10	2.9	209	11.602	27.24	163.44	7.4	0	40	2	0.3	4.2	191	42.1	0	0.186	1387	2009-2010	120.6666667	70.66666667	1	0	0	1	1	1	0	0	1	≥25	1	1	Male	60 and above years	Mexican American	Middle school or lower	Widowed/Divorced/Separated	1	Never	480	Low activity
57091	2	85	81.3	179	29	25	43	4.2	9.3	4.1	90	4.996	11.37	68.22	5.9	0	37	2.6	0.6	2.2	182	2.3	0	NA	0	2009-2010	138	66	0	0	1	0	0	0	0	0	0	<25	0	1	Male	60 and above years	Other Race-Including Multi-Racial	Middle school or lower	Married or living with a partner	1	Current	1920	Medium activity
57106	1	80	96.2	301	28	26	28	4.1	9.4	3.5	105	5.829	21.86	131.16	6.1	134	49	2.5	0.8	3.3	258	7.3	0	0.1495	1312.5	2009-2010	138	56.66666667	0	0	0	1	1	1	0	0	1	≥25	1	1	Female	60 and above years	Non-Hispanic White	Middle school or lower	Married or living with a partner	2	Never	180	Low activity
57131	1	86	75.6	79	15	25	23	4.4	9.4	2.9	91	5.051	5.34	32.04	5.3	89	61	1.1	0.3	2.5	189	2.2	0	0.1935	1800.5	2009-2010	115.3333333	80	0	0	0	0	0	0	0	0	0	<25	0	0	Female	40-59 years	Non-Hispanic White	High School	Married or living with a partner	3	Current	2260	Medium activity
57141	1	87	111.2	114	15	17	17	4	9.4	3.1	89	4.94	12.89	77.34	5.6	93	44	2.5	0.4	4	331	3.9	0	0.061	2438	2009-2010	103.3333333	64	0	0	0	0	1	1	0	0	0	≥25	0	0	Female	20-39 years	Mexican American	High School	Married or living with a partner	2	Never	0	Inactive
57185	1	87	85.5	167	24	29	37	4.4	9.2	2.8	96	5.329	6.03	36.18	5.3	109	41	1.7	0.5	3.9	188	11.9	0	0.006	2592	2009-2010	121.3333333	65.33333333	0	0	0	0	0	0	0	0	0	<25	0	0	Male	40-59 years	Mexican American	Middle school or lower	Married or living with a partner	1	Never	7840	High activity
57208	1	86	81.1	51	11	26	31	4.7	9.5	2.3	114	6.328	4.38	26.28	5.5	0	75	1.2	0.6	2.6	172	7.9	0	0.002	4336.5	2009-2010	117.3333333	64	0	0	0	0	0	0	0	0	0	<25	0	0	Male	40-59 years	Non-Hispanic White	College or above	Married or living with a partner	4	Never	1200	Low activity
57211	2	79	98.7	58	7	17	21	4.3	9.2	2.5	90	4.996	4.89	29.34	5.2	69	58	1.8	0.4	3	261	3	5.6	0.203	1852	2009-2010	104	67.33333333	0	0	0	0	0	0	0	0	0	≥25	0	0	Female	40-59 years	Non-Hispanic White	College or above	Married or living with a partner	2	Never	2740	Medium activity
57214	2	79	127	316	23	21	19	4	9.5	2.8	101	5.607	22.84	137.04	6	136	39	2.8	0.5	3.6	214	4.7	0	0.319	2614	2009-2010	120	71.33333333	0	0	0	1	1	1	0	0	1	≥25	1	1	Male	40-59 years	Non-Hispanic White	College or above	Married or living with a partner	3	Current	4920	High activity
57230	1	85	87.3	52	13	18	24	4.5	9.2	2.3	86	4.774	5.8	34.8	5.3	134	75	1.1	0.4	4.4	201	3.4	0	0.16	1854.5	2009-2010	100.6666667	57.33333333	0	0	0	0	0	0	0	0	0	<25	0	0	Female	60 and above years	Non-Hispanic White	College or above	Married or living with a partner	4	Current	320	Low activity
57238	2	76	110.7	80	18	23	27	4	9.8	3.5	112	6.217	22.39	134.34	5.8	141	44	0.7	0.9	5.4	251	7.2	0	0.2465	2318.5	2009-2010	141.3333333	56	0	1	0	1	1	1	0	0	1	≥25	1	1	Male	60 and above years	Non-Hispanic White	High School	Never Married	3	Never	240	Low activity
57268	2	82	91.5	242	30	33	22	4.4	9.5	2.7	87	4.829	7.43	44.58	5.7	78	43	1.9	0.7	2.4	233	6.2	0	0.191	2058	2009-2010	109.3333333	66.66666667	0	0	0	0	0	0	0	0	0	≥25	0	0	Male	40-59 years	Other Hispanic	College or above	Never Married	1	Current	960	Low activity
57270	2	84	89	63	28	16	24	4.4	9.9	3	108	5.995	6.35	38.1	6.3	110	76	2	0.2	1.5	274	12.7	0	0.044	1065	2009-2010	123.3333333	69.33333333	1	0	0	0	0	0	0	0	0	≥25	0	1	Female	60 and above years	Non-Hispanic Black	High School	Widowed/Divorced/Separated	3	Never	240	Low activity
57276	2	82	82.5	58	14	19	29	4.3	9.3	3	96	5.329	6.87	41.22	5.5	81	84	1.4	0.4	1.4	225	4.8	0	0.046	1621.5	2009-2010	130.6666667	74.66666667	0	0	0	0	0	0	0	0	0	<25	0	0	Female	60 and above years	Non-Hispanic White	High School	Widowed/Divorced/Separated	2	Never	1320	Low activity
57288	1	80	155	77	14	19	21	3.9	9.1	3.1	104	5.773	31.15	186.9	5.3	105	42	1.7	0.4	3.6	231	16.1	0	0.037	2097	2009-2010	105.3333333	74.66666667	0	0	0	1	1	1	0	0	1	≥25	1	0	Female	20-39 years	Non-Hispanic White	High School	Married or living with a partner	1	Never	0	Inactive
57295	2	77	76.5	44	10	13	18	4.4	9.2	2.5	94	5.218	5.14	30.84	5.5	70	59	1.4	0.4	3.5	174	4.1	7.85	0.354	2847.5	2009-2010	104.6666667	71.33333333	0	0	0	0	0	0	0	0	0	<25	0	0	Male	40-59 years	Non-Hispanic White	High School	Married or living with a partner	2	Never	1320	Low activity
57297	2	75	98	105	54	51	34	4.7	9.9	3	96	5.329	5.89	35.34	5.4	85	65	1.7	0.4	3.6	250	11.4	45.7	0.0235	2741	2009-2010	124.6666667	72	0	0	0	0	1	1	0	1	0	≥25	0	0	Male	20-39 years	Non-Hispanic White	High School	Married or living with a partner	3	Current	1760	Low activity
57302	1	80	130.6	80	19	27	22	4.1	9.8	3.6	116	6.439	13.81	82.86	6.2	174	33	1.3	0.6	4.1	238	12.6	0	0.2845	1355	2009-2010	102.6666667	50	1	0	0	1	1	1	0	0	1	≥25	1	1	Male	60 and above years	Non-Hispanic White	High School	Married or living with a partner	2	Current	4080	High activity
57331	2	84	97.4	188	15	29	20	4.7	9.5	2.8	92	5.107	13.77	82.62	5.4	114	44	1.8	0.6	3.7	256	4.2	0	0.2775	2119.5	2009-2010	110.6666667	64.66666667	0	0	0	0	0	0	0	0	0	≥25	0	0	Male	20-39 years	Other Race-Including Multi-Racial	College or above	Never Married	4	Former	2480	Medium activity
57343	1	82	118.4	82	26	18	19	4	9	2.9	174	9.659	10.63	63.78	7.7	0	41	1.7	0.6	4	209	14.4	0	0.057	4318	2009-2010	144.6666667	80.66666667	1	1	0	0	1	1	0	0	0	≥25	0	1	Male	40-59 years	Non-Hispanic Black	High School	Married or living with a partner	3	Never	7680	High activity
57358	2	86	95.7	103	27	21	26	3.9	9	3	150	8.327	3.11	18.66	6.9	0	59	1.6	0.7	3.7	281	101.5	0.1	0.1515	1747	2009-2010	117.3333333	58.66666667	1	0	0	0	0	0	0	0	0	<25	0	0	Male	60 and above years	Non-Hispanic White	High School	Married or living with a partner	2	Current	0	Inactive
57361	1	79	81.4	138	32	44	31	4.8	9.9	2.9	90	4.996	9.99	59.94	5.1	156	51	2.6	0.4	4.3	264	17.7	0	0.0225	1597.5	2009-2010	111.3333333	66.66666667	0	0	0	0	0	0	0	0	0	<25	0	0	Female	20-39 years	Mexican American	High School	Married or living with a partner	2	Never	0	Inactive
57369	2	86	120.4	102	50	33	26	4.3	9.5	3.3	136	7.549	36.46	218.76	6.1	0	41	2.5	0.5	3.2	197	6.7	13.65	0.0625	1832.5	2009-2010	107.3333333	62.66666667	1	0	0	1	1	1	0	0	1	≥25	1	0	Male	40-59 years	Mexican American	Middle school or lower	Married or living with a partner	1	Former	240	Low activity
57371	1	80	103.2	373	23	9	16	3.7	9.8	2.9	103	5.718	11.54	69.24	6.2	185	28	2.6	0.9	5	291	1.7	0	0.038	950.5	2009-2010	136	55.33333333	0	0	0	1	1	1	0	0	1	≥25	1	1	Female	60 and above years	Non-Hispanic White	Middle school or lower	Widowed/Divorced/Separated	1	Current	840	Low activity
57374	1	78	98.4	57	44	27	34	3.8	9.7	4.6	82	4.552	6.75	40.5	5.8	106	34	3.3	0.6	11.3	448	2.9	28.1	0.0045	6337	2009-2010	104	68	0	0	0	0	0	0	0	0	0	≥25	0	0	Male	40-59 years	Non-Hispanic Black	High School	Never Married	1	Current	1440	Low activity
57401	2	87	88.2	51	19	17	19	4	8.6	3.1	86	4.774	8.64	51.84	5.3	107	43	2	0.6	5.1	355	4.7	0	0.0045	924.5	2009-2010	97.33333333	66.66666667	0	0	0	0	0	0	0	0	0	≥25	0	0	Female	20-39 years	Other Race-Including Multi-Racial	College or above	Married or living with a partner	2	Never	240	Low activity
57478	3	86	89.4	110	22	21	26	4.6	9.5	2.1	105	5.829	15.38	92.28	5.2	128	45	2.1	0.3	5	240	12.2	0	0.178	3240	2009-2010	112	63.33333333	0	0	0	1	0	1	0	0	1	≥25	1	1	Female	60 and above years	Mexican American	High School	Married or living with a partner	2	Former	0	Inactive
57495	1	78	73.6	45	14	19	24	4.5	10.1	3.3	89	4.94	5.85	35.1	5.9	81	71	2.1	0.5	3.1	171	5.5	0	0.253	2144.5	2009-2010	120	33.33333333	0	0	0	0	0	0	0	0	0	<25	0	0	Male	20-39 years	Non-Hispanic Black	Middle school or lower	Never Married	1	Current	18720	High activity
57507	1	79	80.2	72	40	14	18	4	9.3	3.1	82	4.552	4.02	24.12	5.2	87	80	2.7	0.6	3.6	219	6	0	0.088	2051	2009-2010	118	68.66666667	0	0	0	0	0	0	0	0	0	≥25	0	0	Female	20-39 years	Non-Hispanic White	College or above	Never Married	2	Never	6480	High activity
57509	1	79	86.3	49	20	21	23	4.8	9.7	2.3	95	5.273	4.14	24.84	5	0	58	2	0.7	4.5	236	10.4	44.7	0.094	2800	2009-2010	108.6666667	70	0	0	0	0	0	0	0	1	0	<25	0	0	Male	20-39 years	Non-Hispanic White	College or above	Never Married	4	Never	3360	Medium activity
57530	2	88	109.2	52	15	28	21	4	9.4	3.3	122	6.772	14.52	87.12	6.2	0	44	2.1	0.6	5.2	286	9.6	0	0.2985	1512.5	2009-2010	111.3333333	50	1	0	0	1	0	1	0	0	1	≥25	1	1	Female	40-59 years	Non-Hispanic White	High School	Married or living with a partner	3	Current	0	Inactive
57537	1	80	121.7	288	92	54	32	4.2	9.5	2.7	100	5.551	18.57	111.42	5.3	103	31	2.8	0.8	3.1	255	10.4	66.65	0.2815	3236.5	2009-2010	108.6666667	74	0	0	0	1	1	1	0	1	0	≥25	1	1	Male	40-59 years	Non-Hispanic White	Middle school or lower	Never Married	1	Current	0	Inactive
57573	2	85	90.8	183	23	19	33	4.4	9.1	3.6	114	6.328	16.29	97.74	6.5	0	59	2.3	0.4	1.4	155	44.3	0	NA	0	2009-2010	152.6666667	67.33333333	1	1	1	1	0	1	0	0	1	≥25	1	1	Female	60 and above years	Other Race-Including Multi-Racial	High School	Married or living with a partner	1	Current	1680	Low activity
57593	2	84	85.9	82	12	14	20	4.5	9.6	2.6	105	5.829	13.08	78.48	5.5	0	43	2.4	0.6	3.9	194	3.9	0	NA	0	2009-2010	116.6666667	68.66666667	0	0	0	0	0	0	0	0	0	<25	0	0	Male	40-59 years	Other Race-Including Multi-Racial	High School	Widowed/Divorced/Separated	4	Current	2640	Medium activity
57601	1	82	102.5	64	39	29	20	4.4	9.7	3.1	105	5.829	18.34	110.04	5.4	117	60	2	0.6	4	177	68.7	31.65	5.00E-04	2018	2009-2010	155.3333333	108.6666667	0	0	0	0	1	1	0	1	0	≥25	0	0	Male	40-59 years	Non-Hispanic Black	College or above	Married or living with a partner	4	Never	840	Low activity
57606	1	80	124.8	133	9	21	27	3.8	9	2.9	86	4.774	13.54	81.24	5.2	76	74	1.9	0.5	4.1	289	3.1	6.95	0.341	3979.5	2009-2010	106	76	0	0	0	0	1	1	0	0	0	≥25	0	0	Female	40-59 years	Non-Hispanic White	High School	Married or living with a partner	4	Never	0	Inactive
57615	2	76	70.9	37	10	17	20	4.5	9.5	3.4	108	5.995	7.74	46.44	5.6	0	51	1.4	0.5	4.4	186	10	0	0.157	1871.5	2009-2010	113.3333333	64.66666667	0	0	0	0	0	0	0	0	0	<25	0	0	Male	20-39 years	Non-Hispanic White	High School	Never Married	2	Never	2400	Medium activity
57645	1	87	95.3	56	16	22	19	4.2	9.3	2.6	92	5.107	5.09	30.54	5.3	107	44	1.2	0.3	1.9	205	2.6	0	0.1335	3009.5	2009-2010	105.3333333	58	0	0	0	0	0	0	0	0	0	≥25	0	0	Female	20-39 years	Mexican American	Middle school or lower	Never Married	1	Never	0	Inactive
57653	1	83	111.2	47	15	16	18	4.6	9.1	2	110	6.106	8.68	52.08	5.8	121	81	3.1	1	4.5	150	11.4	0	0.355	2964.5	2009-2010	132.6666667	53.33333333	0	1	0	0	0	0	0	0	0	≥25	0	1	Male	60 and above years	Non-Hispanic White	Middle school or lower	Married or living with a partner	4	Current	80	Low activity
57667	2	87	99.5	192	128	101	43	4.3	9.5	2.9	108	5.995	16.9	101.4	5.8	202	51	2.5	0.5	4.1	167	3.9	0	0.054	1496	2009-2010	154.6666667	97.33333333	1	0	0	1	1	1	0	0	1	≥25	1	1	Female	40-59 years	Other Race-Including Multi-Racial	High School	Married or living with a partner	1	Never	0	Inactive
57669	2	87	116	70	17	22	27	4.2	9.7	3	99	5.495	13.45	80.7	5.8	163	86	2.1	0.4	3	180	1.3	0	0.0825	1452	2009-2010	124	60	0	0	0	1	1	1	0	0	1	≥25	1	0	Male	60 and above years	Other Hispanic	College or above	Widowed/Divorced/Separated	2	Never	420	Low activity
57677	2	82	91.6	122	31	41	34	4.3	9.5	3.8	97	5.384	13.41	80.46	5.7	113	33	2.3	0.4	1.9	245	6.3	0	0	1845	2009-2010	146	106	0	0	0	0	0	0	0	0	0	≥25	0	0	Male	40-59 years	Non-Hispanic Black	College or above	Married or living with a partner	1	Never	9600	High activity
57686	2	80	129.5	142	20	14	18	4	9.6	3.5	101	5.607	14.42	86.52	5.6	101	49	2	0.8	5.6	285	29.6	0	0.3025	2244	2009-2010	124	90	0	0	0	1	1	1	0	0	1	≥25	1	1	Female	60 and above years	Non-Hispanic White	High School	Married or living with a partner	2	Never	0	Inactive
57689	1	77	107.3	68	18	16	18	4.4	9.4	2.3	98	5.44	4.34	26.04	5.2	111	62	1.1	0.9	4	223	1.3	17.15	0.3505	2277	2009-2010	104.6666667	68	0	0	0	0	0	0	0	0	0	≥25	0	0	Male	40-59 years	Non-Hispanic White	College or above	Married or living with a partner	4	Never	2880	Medium activity
57695	2	87	85.8	81	12	19	24	3.9	9.3	2.9	94	5.218	12.71	76.26	5.3	97	80	3.8	0.4	2.9	199	6.2	0.1	0.0035	1690.5	2009-2010	105.3333333	60.66666667	0	0	0	0	0	0	0	0	0	<25	0	0	Female	20-39 years	Other Hispanic	High School	Never Married	2	Never	1200	Low activity
57757	2	76	90	51	106	38	30	4.5	9.6	2.6	82	4.552	6.45	38.7	5.4	70	104	2.2	0.5	3.1	247	6	17	0.379	1395	2009-2010	128	50	0	0	0	0	0	0	0	0	0	≥25	0	0	Female	60 and above years	Non-Hispanic White	High School	Married or living with a partner	1	Current	15120	High activity
57782	2	86	103.6	71	24	34	26	4.2	9.9	3.2	88	4.885	17.05	102.3	5.6	103	54	2.1	0.5	2.8	387	14.2	0	5.00E-04	2141.5	2009-2010	122.6666667	62	0	0	0	0	1	1	0	0	0	≥25	0	0	Male	20-39 years	Non-Hispanic Black	High School	Married or living with a partner	3	Never	6720	High activity
57800	2	76	101.5	248	26	17	29	3.6	9.1	3	90	4.996	10.24	61.44	5.9	113	37	1	0.6	2.8	214	3.7	0	0.014	3233	2009-2010	100.6666667	64.66666667	0	0	0	0	1	1	0	0	0	≥25	0	1	Male	60 and above years	Non-Hispanic White	High School	Married or living with a partner	4	Current	1320	Low activity
57819	2	83	97.2	151	28	28	21	4	9.1	2.7	104	5.773	11.07	66.42	6.1	146	33	2.8	0.3	4	317	7.7	0	1.108	1599	2009-2010	127.3333333	66.66666667	0	0	0	0	0	0	0	0	0	<25	0	1	Female	40-59 years	Non-Hispanic White	High School	Married or living with a partner	2	Current	600	Low activity
57831	2	76	119.6	76	13	12	20	4.1	9.3	2.3	88	4.885	8.19	49.14	5.5	107	46	0.6	0.6	4.2	263	5.7	0	0.015	2073	2009-2010	108	72	0	0	0	0	1	1	0	0	0	≥25	0	0	Male	60 and above years	Non-Hispanic White	High School	Married or living with a partner	4	Never	1400	Low activity
57836	2	88	89	39	10	17	20	4.2	9.1	2.8	85	4.718	5.42	32.52	5.1	70	80	1.4	0.4	2.6	214	7.5	0.25	0	882.5	2009-2010	114	63.33333333	0	0	0	0	0	0	0	0	0	<25	0	0	Female	20-39 years	Mexican American	Middle school or lower	Married or living with a partner	2	Never	0	Inactive
57842	2	84	107.5	87	13	14	22	4	9.2	2.9	95	5.273	20.34	122.04	5.6	112	45	1.7	0.6	2.1	124	14	14	0.148	2275	2009-2010	121.3333333	58.66666667	0	1	1	0	0	0	0	0	0	≥25	0	0	Male	60 and above years	Non-Hispanic Black	High School	Married or living with a partner	4	Current	240	Low activity
57859	2	79	88.7	81	12	14	20	4.2	9.3	2.7	98	5.44	4	24	5.5	105	61	1.9	0.6	3.4	347	10.4	0	0.344	2060.5	2009-2010	122	68	0	0	0	0	0	0	0	0	0	≥25	0	0	Female	40-59 years	Non-Hispanic White	College or above	Married or living with a partner	4	Never	0	Inactive
57864	1	76	105.6	488	12	20	21	4.3	9.6	3.3	114	6.328	34.46	206.76	5.1	182	25	2.2	0.5	3.3	207	5.2	0	0.025	1003	2009-2010	105.3333333	60	0	0	0	1	1	1	0	0	1	≥25	1	1	Female	20-39 years	Mexican American	Middle school or lower	Married or living with a partner	1	Never	1200	Low activity
57868	2	79	95.1	52	14	18	17	4.4	9.6	2.8	90	4.996	11.4	68.4	5.5	138	49	1.5	0.5	3	257	10.8	23.15	0.9675	3198	2009-2010	118	76	0	0	0	0	0	0	0	0	0	≥25	0	0	Male	20-39 years	Non-Hispanic White	High School	Never Married	1	Never	0	Inactive
57869	1	88	94.8	128	10	21	21	4	9.2	3.2	215	11.935	16.02	96.12	8.7	0	41	1.6	0.4	3.6	162	1.9	0	0.038	1565	2009-2010	162.6666667	54	1	0	0	1	0	1	0	0	1	<25	1	1	Female	60 and above years	Mexican American	Middle school or lower	Never Married	2	Never	840	Low activity
57906	2	85	79	58	13	19	29	3.7	9.1	2.8	77	4.274	20.22	121.32	5.3	0	71	1.1	0.5	2.9	171	8.1	0	0.0025	1879.5	2009-2010	121.3333333	50	0	0	1	0	0	0	0	0	0	<25	0	0	Female	60 and above years	Non-Hispanic White	College or above	Widowed/Divorced/Separated	3	Never	600	Low activity
57914	2	76	77.1	80	11	13	23	4	9.4	2.5	100	5.551	8.79	52.74	5.6	107	78	1.3	0.5	5.2	241	23.2	0	NA	0	2009-2010	142	63.33333333	0	0	0	0	0	0	0	0	0	<25	0	0	Female	60 and above years	Non-Hispanic White	High School	Married or living with a partner	3	Never	0	Inactive
57948	2	81	84.7	93	16	15	21	4.3	9.2	2.9	106	5.884	8.38	50.28	5.4	142	61	1.7	0.4	7.1	389	26.5	0	0.001	1036.5	2009-2010	132	70.66666667	0	0	0	0	0	0	0	0	0	<25	0	0	Female	60 and above years	Non-Hispanic White	High School	Married or living with a partner	4	Never	960	Low activity
57953	1	79	77.9	168	14	22	21	4.9	9.6	2.7	98	5.44	10.69	64.14	4.8	81	53	2.1	0.6	2.8	220	1.3	56.3	0.084	2541.5	2009-2010	119.3333333	66.66666667	0	0	0	0	0	0	0	1	0	<25	0	0	Male	20-39 years	Non-Hispanic White	College or above	Never Married	1	Current	3840	High activity
57957	1	77	87.5	81	22	14	27	4.7	9.8	3.2	82	4.552	4.74	28.44	5.3	72	94	3.1	0.4	4.8	259	2.8	22.4	0.284	1359	2009-2010	104.6666667	64.66666667	0	0	0	0	0	0	0	1	0	≥25	0	0	Female	20-39 years	Non-Hispanic White	High School	Widowed/Divorced/Separated	3	Current	19920	High activity
57965	1	81	106.8	313	42	38	26	4.2	9	3.4	163	9.048	44.03	264.18	6.8	306	37	3.3	0.6	3.9	235	14	0	0.1125	2668	2009-2010	122.6666667	79.33333333	1	0	0	1	1	1	0	0	1	≥25	1	1	Female	20-39 years	Mexican American	High School	Never Married	2	Never	0	Inactive
57973	2	76	86.7	96	13	11	13	4.2	9.6	2.8	96	5.329	12.62	75.72	5.7	106	51	3.3	0.7	7.1	276	9.4	0	0.1975	3490.5	2009-2010	101.3333333	59.33333333	0	0	0	0	0	0	0	0	0	<25	0	0	Female	40-59 years	Non-Hispanic White	Middle school or lower	Widowed/Divorced/Separated	1	Current	21840	High activity
57992	2	75	110	82	9	9	27	4.5	8.7	2.7	85	4.718	2.77	16.62	6.3	0	42	0.9	0.5	4.5	154	49.4	0	0.05	916	2009-2010	167	33	1	1	1	0	0	0	0	0	0	≥25	0	1	Female	60 and above years	Non-Hispanic White	Middle school or lower	Widowed/Divorced/Separated	1	Current	0	Inactive
57993	2	79	87	70	13	15	19	4.8	10	2.7	101	5.607	9.21	55.26	5.1	0	50	1.7	0.2	3.7	247	1.1	0	0.043	1911.5	2009-2010	115.3333333	68.66666667	0	0	0	0	0	0	0	0	0	<25	0	0	Male	20-39 years	Non-Hispanic White	College or above	Married or living with a partner	4	Never	840	Low activity
58003	1	87	99.2	87	5	14	21	4.1	8.8	2.5	82	4.552	9.5	57	4.8	66	40	1.7	0.3	2.6	221	2.2	0	1.599	1797	2009-2010	101.3333333	54	0	0	0	0	0	0	0	0	0	≥25	0	0	Female	20-39 years	Non-Hispanic White	High School	Married or living with a partner	3	Never	1800	Medium activity
58016	2	75	92	80	16	21	18	4.5	9.7	3.1	93	5.162	8.52	51.12	5.5	96	37	2.5	0.7	4.2	250	5.1	0	0.384	2519	2009-2010	105.3333333	54	0	0	0	0	0	0	0	0	0	<25	0	0	Female	20-39 years	Non-Hispanic White	High School	Married or living with a partner	2	Current	10080	High activity
58036	1	84	88.9	91	18	14	19	4.2	9.8	3.5	101	5.607	9.41	56.46	5.6	129	59	1.7	0.6	3.7	208	13.2	0	0.0315	922.5	2009-2010	142	58	0	0	0	0	0	0	0	0	0	<25	0	0	Female	60 and above years	Non-Hispanic Black	College or above	Widowed/Divorced/Separated	2	Current	0	Inactive
58058	2	79	107	126	27	27	27	4.6	9.2	3	89	4.94	12.67	76.02	5.1	115	51	1.4	0.4	4.9	200	5.3	0	0.1795	3059.5	2009-2010	120	37.33333333	0	0	0	1	1	1	0	0	1	≥25	1	0	Male	60 and above years	Non-Hispanic White	High School	Married or living with a partner	3	Current	2580	Medium activity
58071	3	86	101.9	253	131	66	43	4.5	9.3	2.9	104	5.773	10.92	65.52	5.2	54	26	2	0.5	3.5	283	30.8	33.5	0.202	3668	2009-2010	151.3333333	110.6666667	0	0	0	1	1	1	1	1	0	≥25	1	1	Male	20-39 years	Non-Hispanic White	High School	Married or living with a partner	1	Current	20400	High activity
58092	1	76	101	162	26	26	27	4.4	9.5	2.7	102	5.662	7.74	46.44	5.4	113	39	1.5	0.6	2.7	192	8	0	0.12	2895	2009-2010	118	78.66666667	0	0	0	0	1	1	0	0	0	≥25	0	0	Male	20-39 years	Non-Hispanic White	High School	Married or living with a partner	3	Current	3840	High activity
58115	2	83	99.7	106	29	21	24	4.3	9.5	2.6	113	6.273	7.71	46.26	6.3	193	63	2.8	0.4	2.7	199	13	0	0.042	1071	2009-2010	151.3333333	15.33333333	0	0	0	0	0	0	0	0	0	≥25	0	1	Female	60 and above years	Non-Hispanic White	High School	Married or living with a partner	3	Never	0	Inactive
58125	1	82	95.2	111	37	23	19	4.4	9.5	2.8	103	5.718	16.55	99.3	5.4	125	42	1.7	0.5	6.4	244	7.5	0	0.1815	3102.5	2009-2010	97	56	0	0	0	1	0	1	1	0	0	≥25	1	0	Female	40-59 years	Non-Hispanic White	High School	Widowed/Divorced/Separated	1	Current	10560	High activity
58132	1	85	100.8	60	11	17	21	4.2	8.9	3.1	82	4.552	7.88	47.28	4.9	179	56	1.7	0.4	3.2	309	31.6	0	0.003	1880	2009-2010	109.3333333	60	0	0	0	0	0	0	0	0	0	≥25	0	0	Female	20-39 years	Other Race-Including Multi-Racial	College or above	Married or living with a partner	2	Never	7680	High activity
58151	1	88	105.4	75	33	16	21	4.3	9.7	3.4	113	6.273	11.92	71.52	5.5	158	104	1.4	0.3	5.7	186	157.5	0	0.156	1282.5	2009-2010	145.3333333	74.66666667	0	0	0	1	0	1	0	0	1	≥25	1	1	Male	60 and above years	Non-Hispanic White	Middle school or lower	Married or living with a partner	1	Current	0	Inactive
58171	1	76	103.5	48	15	41	32	4.8	9.8	2.5	103	5.718	3.11	18.66	5.5	83	75	1.8	0.3	2.5	243	1.7	0	0.161	2623.5	2009-2010	118.6666667	69.33333333	0	0	0	0	0	0	0	0	0	≥25	0	0	Male	40-59 years	Non-Hispanic White	High School	Married or living with a partner	4	Current	12240	High activity
58195	1	76	141.3	191	21	35	22	4.3	9.1	2.7	107	5.94	42.9	257.4	5.3	115	28	0.9	0.2	2.7	174	29.3	0	0.128	2840	2009-2010	127	85	0	0	0	1	1	1	0	0	1	≥25	1	1	Male	40-59 years	Non-Hispanic White	College or above	Married or living with a partner	4	Never	4080	High activity
58215	1	77	91	132	15	17	22	4.5	9.6	2.5	98	5.44	1	6	5.3	72	62	2.2	0.4	2.7	166	6.9	7.6	0.004	2532.5	2009-2010	126	74	0	0	0	0	0	0	0	0	0	<25	0	0	Female	40-59 years	Non-Hispanic White	Middle school or lower	Married or living with a partner	4	Current	5760	High activity
58236	2	81	104.2	80	9	51	31	4.6	9.9	3	106	5.884	28.02	168.12	5.6	131	46	2.1	0.4	3.3	221	6	0	0.0995	1038	2009-2010	100	76	0	0	0	1	0	1	0	0	1	≥25	1	1	Female	40-59 years	Non-Hispanic White	High School	Widowed/Divorced/Separated	3	Never	320	Low activity
58257	1	84	83.4	79	67	29	27	4.6	9.9	2.9	107	5.94	5.85	35.1	5.8	115	80	1.9	0.4	3.6	246	7.2	0	0.0905	2501.5	2009-2010	129.3333333	84.66666667	0	0	0	0	0	0	0	0	0	<25	0	0	Male	20-39 years	Non-Hispanic Black	High School	Married or living with a partner	3	Never	13440	High activity
58265	2	75	106.9	267	39	32	33	4.1	8.9	2.8	112	6.217	34.27	205.62	5.6	0	43	1.8	0.4	2.8	183	5.3	0	0.0205	1769.5	2009-2010	167.3333333	89.33333333	1	1	0	1	1	1	0	0	1	≥25	1	1	Female	60 and above years	Non-Hispanic White	High School	Widowed/Divorced/Separated	2	Never	1920	Medium activity
58271	2	84	81.7	47	29	25	26	4.3	9.4	2.3	84	4.663	8.33	49.98	5.1	97	61	1.1	0.4	4.1	141	6.5	9.9	0.2075	1772.5	2009-2010	85.33333333	56.66666667	0	0	0	0	0	0	0	0	0	<25	0	0	Female	40-59 years	Non-Hispanic White	College or above	Married or living with a partner	4	Never	2600	Medium activity
58272	1	80	91.4	62	13	21	23	3.8	9.4	3.7	104	5.773	11.82	70.92	5.6	158	44	1.7	0.7	9.4	280	23.3	0	0.083	2618.5	2009-2010	124	74.66666667	0	0	0	0	0	0	0	0	0	≥25	0	0	Male	40-59 years	Non-Hispanic Black	High School	Married or living with a partner	1	Never	720	Low activity
58275	1	82	83.9	143	31	24	24	4.2	9.9	2.8	92	5.107	9	54	5.6	94	61	2.4	0.8	3.8	259	4.9	0	0.092	3183.5	2009-2010	128.6666667	60	0	0	0	0	0	0	0	0	0	<25	0	0	Male	40-59 years	Non-Hispanic Black	High School	Widowed/Divorced/Separated	2	Current	720	Low activity
58288	3	86	115.2	117	27	18	26	3.9	9.6	3.2	109	6.051	13.5	81	6	168	56	1.3	0.6	3.9	330	9	0	0.109	2256.5	2009-2010	137.3333333	73.33333333	0	0	0	1	1	1	0	0	1	≥25	1	0	Female	60 and above years	Non-Hispanic White	High School	Widowed/Divorced/Separated	3	Current	0	Inactive
58308	1	82	103.5	149	30	33	25	4.2	9.2	3.1	95	5.273	22.69	136.14	5.4	114	55	2.3	0.3	3.6	253	62.8	0	0.0095	913	2009-2010	100	54	0	0	0	1	1	1	0	0	1	≥25	1	0	Female	20-39 years	Mexican American	High School	Never Married	1	Never	1920	Medium activity
58310	3	86	62	125	5	13	20	4.9	9.6	2.9	115	6.384	8.51	51.06	5.5	120	59	2.5	0.5	7.2	184	1.4	0.05	0.288	1948.5	2009-2010	111.3333333	67.33333333	0	0	0	0	0	0	0	0	0	<25	0	0	Female	20-39 years	Other Race-Including Multi-Racial	College or above	Married or living with a partner	4	Never	640	Low activity
58340	2	79	93.2	59	17	31	34	4.7	9.8	2.5	87	4.829	8.7	52.2	5.2	47	34	2.5	0.5	3.8	198	4.1	0	0.356	1347.5	2009-2010	112	65.33333333	0	0	0	0	0	0	0	0	0	≥25	0	0	Male	20-39 years	Other Race-Including Multi-Racial	College or above	Never Married	4	Current	2880	Medium activity
58341	2	82	94	67	12	18	18	4.4	9.1	2.2	104	5.773	12.1	72.6	5.4	76	51	2.6	0.4	3.5	268	46.8	16.35	0.4215	2279.5	2009-2010	108.6666667	69.33333333	0	0	0	0	0	0	0	0	0	≥25	0	0	Female	20-39 years	Non-Hispanic Black	Middle school or lower	Never Married	1	Current	120	Low activity
58343	1	77	120.3	235	61	58	34	4.4	9.5	3.1	180	9.992	19.36	116.16	8.5	337	39	2.2	0.5	2.7	268	14.6	38.5	0.105	1692.5	2009-2010	113	76	1	0	0	1	1	1	0	1	0	≥25	1	1	Male	40-59 years	Non-Hispanic White	College or above	Married or living with a partner	4	Never	960	Low activity
58350	1	82	112.2	210	38	47	31	4.3	9.2	2.7	125	6.939	42.65	255.9	5.7	198	43	2.9	0.4	2.8	196	99.8	0	0.071	1484	2009-2010	136	80	0	0	0	1	1	1	0	0	1	≥25	1	1	Female	60 and above years	Non-Hispanic White	Middle school or lower	Married or living with a partner	3	Current	480	Low activity
58361	2	79	111	146	19	17	24	3.9	9.3	3.2	90	4.996	37.03	222.18	5.6	100	41	2.9	0.4	4	304	2.2	0	5.00E-04	1780	2009-2010	116	66	0	0	0	1	1	1	0	0	1	≥25	1	1	Female	20-39 years	Non-Hispanic Black	High School	Never Married	4	Never	7200	High activity
58362	2	83	117.7	50	21	10	14	3.9	9.2	2.9	93	5.162	15.8	94.8	5.6	0	60	2.7	0.5	5.8	265	6.6	0	NA	0	2009-2010	126	80	0	0	0	0	1	1	0	0	0	≥25	0	0	Female	20-39 years	Non-Hispanic Black	High School	Married or living with a partner	2	Never	1200	Low activity
58364	2	84	84.2	65	20	19	27	4.7	10.2	2.8	95	5.273	10.73	64.38	5.7	73	61	2.6	0.4	2.4	219	25.3	0	0.082	1820	2009-2010	113.3333333	63.33333333	0	0	0	0	0	0	0	0	0	≥25	0	0	Male	20-39 years	Non-Hispanic Black	High School	Never Married	4	Never	8040	High activity
58378	1	83	94.7	219	19	15	15	4.6	9.4	3	66	3.664	20.27	121.62	5.5	0	46	2.5	0.7	7.1	317	2.7	42.15	0.1725	3313.5	2009-2010	116	68	0	0	0	0	0	0	0	1	0	≥25	0	1	Female	40-59 years	Non-Hispanic White	High School	Widowed/Divorced/Separated	2	Current	6440	High activity
58392	1	76	99.7	136	10	17	21	4.4	9.8	3	111	6.162	14.82	88.92	5.5	209	60	1.9	0.7	3.8	165	7.3	0	0.068	2169.5	2009-2010	148.6666667	63.33333333	1	1	0	0	0	0	0	0	0	≥25	0	1	Female	60 and above years	Non-Hispanic White	High School	Widowed/Divorced/Separated	2	Never	0	Inactive
58440	1	82	93.5	232	17	18	21	4.2	9.4	2.8	100	5.551	16.88	101.28	5.9	134	41	2.5	0.6	4.9	214	3.9	0	0.199	1830	2009-2010	129.3333333	66	0	0	0	1	0	1	0	0	1	<25	1	1	Female	60 and above years	Non-Hispanic White	High School	Married or living with a partner	3	Current	40	Low activity
58442	1	77	107.6	500	39	25	29	4.2	9.7	3.3	179	9.936	18.03	108.18	9.1	342	44	2.1	0.6	4.9	287	126	0	0.5775	1464	2009-2010	223.3333333	132	1	0	0	1	1	1	0	0	1	≥25	1	1	Female	60 and above years	Non-Hispanic White	High School	Never Married	1	Current	0	Inactive
58444	2	83	122	65	35	19	17	3.9	9.4	3.2	119	6.606	20.24	121.44	6.8	164	44	1.4	0.3	2.7	219	1.9	0	0.1105	1091.5	2009-2010	115.3333333	78	1	1	0	1	1	1	0	0	1	≥25	1	1	Female	40-59 years	Non-Hispanic Black	Middle school or lower	Widowed/Divorced/Separated	2	Never	320	Low activity
58465	1	79	116.2	101	31	31	32	4.5	9.4	3.1	121	6.717	16.17	97.02	5.9	90	52	1.7	0.4	1.9	160	24.2	15.85	0.119	2054.5	2009-2010	121.3333333	85.33333333	0	0	0	1	1	1	0	0	1	≥25	1	1	Male	40-59 years	Non-Hispanic Black	College or above	Married or living with a partner	3	Never	6720	High activity
58479	2	85	93.8	74	13	29	32	4.1	9.2	2.6	108	5.995	11.35	68.1	5.4	0	39	1.9	0.5	3.8	221	3.7	0	NA	0	2009-2010	108	65.33333333	0	0	0	0	0	0	0	0	0	<25	0	0	Male	40-59 years	Non-Hispanic White	High School	Married or living with a partner	4	Never	3360	Medium activity
58484	1	78	82.7	76	18	15	19	4.4	9.9	2.5	162	8.993	94.1	564.6	5	71	70	2.9	0.5	2.5	219	10	58.5	0.4585	1950	2009-2010	110	59	1	0	0	1	0	1	0	1	0	<25	1	0	Male	20-39 years	Non-Hispanic White	High School	Never Married	4	Current	3360	Medium activity
58489	1	89	72.7	49	18	15	25	4.4	9.5	2.9	91	5.051	11.65	69.9	5.1	76	62	2.6	0.5	3.5	169	2.8	0	0.083	1154	2009-2010	108.6666667	62.66666667	0	0	0	0	0	0	0	0	0	≥25	0	0	Female	20-39 years	Mexican American	Middle school or lower	Married or living with a partner	1	Never	600	Low activity
58505	2	77	105	68	13	21	26	4.7	9.7	3.1	102	5.662	5.97	35.82	5.5	111	69	1.7	0.5	3.4	268	4.3	0	5.00E-04	1975	2009-2010	94	71	0	0	0	0	0	0	0	0	0	<25	0	0	Female	40-59 years	Non-Hispanic White	College or above	Married or living with a partner	4	Never	1560	Low activity
58537	1	80	87	46	15	14	19	4.5	9.6	2.5	94	5.218	5.54	33.24	5.6	81	52	1.8	0.4	4.8	332	9.2	0	0.0045	2688.5	2009-2010	109.3333333	64.66666667	0	0	0	0	0	0	0	0	0	<25	0	0	Female	20-39 years	Non-Hispanic White	High School	Married or living with a partner	2	Never	12000	High activity
58539	2	88	99.5	115	18	13	16	4.3	10.4	2.7	120	6.661	30.11	180.66	5.4	177	76	1.8	0.5	6.5	157	20	0	0.032	1644.5	2009-2010	124.6666667	41.33333333	0	1	0	1	0	1	0	0	1	≥25	1	1	Female	60 and above years	Mexican American	High School	Widowed/Divorced/Separated	2	Never	0	Inactive
58545	1	83	115.3	54	48	21	19	4	9	3.6	108	5.995	9.26	55.56	6.3	105	51	2	0.6	3.7	225	5.9	0	0.044	1989	2009-2010	118	70.66666667	0	0	0	1	1	1	0	0	1	≥25	1	0	Male	60 and above years	Other Hispanic	Middle school or lower	Married or living with a partner	3	Current	0	Inactive
58567	1	82	110.2	148	38	18	22	4.4	9.3	3	111	6.162	4.23	25.38	6	218	53	1.3	0.6	3.5	226	99.1	84.2	0.009	2849	2009-2010	145.3333333	76	1	0	0	0	1	1	0	1	0	≥25	0	1	Male	60 and above years	Non-Hispanic White	High School	Widowed/Divorced/Separated	1	Current	0	Inactive
58570	1	86	81	38	20	17	22	4.3	9.4	2.4	89	4.94	5.34	32.04	4.9	63	82	0.9	0.4	2.6	265	3	7	0.0845	1509.5	2009-2010	104.6666667	69.33333333	0	0	0	0	0	0	0	0	0	<25	0	0	Female	40-59 years	Non-Hispanic White	College or above	Widowed/Divorced/Separated	3	Current	2160	Medium activity
58571	1	80	114.3	139	8	17	23	3.5	8.9	2.7	84	4.663	7.15	42.9	5.6	79	59	2.1	0.9	6.1	212	1.4	0	0.326	984.5	2009-2010	94	50	0	0	0	0	1	1	0	0	0	≥25	0	0	Female	40-59 years	Non-Hispanic White	High School	Widowed/Divorced/Separated	1	Current	3300	Medium activity
58573	1	88	102.6	85	32	43	34	4.4	9.5	2.8	143	7.938	8.8	52.8	10.2	0	55	2	0.3	4.2	193	23.2	0	0.041	1382.5	2009-2010	116.6666667	78.66666667	1	0	0	0	1	1	0	0	0	≥25	0	0	Male	40-59 years	Other Race-Including Multi-Racial	High School	Married or living with a partner	3	Never	5760	High activity
58598	1	75	125.4	190	26	18	26	4.5	9.2	3.2	103	5.718	20.15	120.9	5.6	118	33	2.5	0.6	3.6	255	9.4	0	0.064	3559.5	2009-2010	111.3333333	68	0	0	0	1	1	1	0	0	1	≥25	1	1	Male	20-39 years	Non-Hispanic White	High School	Never Married	2	Never	0	Inactive
58600	1	79	67.8	61	14	15	30	4.2	9.5	3	86	4.774	4.43	26.58	5.1	81	64	1.9	0.3	1.3	191	3.1	0	0.052	2654.5	2009-2010	116	60.66666667	0	0	0	0	0	0	0	0	0	<25	0	0	Female	20-39 years	Other Race-Including Multi-Racial	High School	Married or living with a partner	2	Never	0	Inactive
58625	2	80	133.9	121	28	35	29	4.3	9.9	2.8	101	5.607	43.89	263.34	5.6	101	35	2	0.5	3.5	292	5.4	0	0	1699.5	2009-2010	128.6666667	83.33333333	0	0	0	1	1	1	0	0	1	≥25	1	0	Male	20-39 years	Non-Hispanic Black	High School	Never Married	2	Never	11280	High activity
58631	1	77	106.2	53	10	15	16	4.2	9.5	3.2	97	5.384	6.83	40.98	5.3	109	37	1.7	0.5	4	283	6.9	0	0.182	3122	2009-2010	108	73.33333333	0	0	0	0	0	0	0	0	0	≥25	0	0	Male	20-39 years	Non-Hispanic White	High School	Married or living with a partner	2	Current	3840	High activity
58671	2	78	89.1	138	39	33	28	4.3	9.3	2.7	127	7.05	15.89	95.34	6.8	0	44	1.9	0.4	3.2	210	2.5	0	0.154	1777	2009-2010	127.3333333	68	1	0	0	1	0	1	0	0	1	≥25	1	1	Female	60 and above years	Other Race-Including Multi-Racial	High School	Married or living with a partner	4	Never	480	Low activity
58678	2	80	105.5	434	64	55	35	4.8	10	2.8	95	5.273	20.18	121.08	5.2	93	29	2.2	0.7	3.2	257	6.5	0	0.047	2171.5	2009-2010	107.3333333	55.33333333	0	0	0	1	1	1	0	0	1	≥25	1	1	Male	20-39 years	Non-Hispanic White	Middle school or lower	Never Married	1	Never	400	Low activity
58693	2	81	93.6	173	14	22	25	4.2	9.5	3	97	5.384	14.75	88.5	5.9	165	48	1.9	0.5	2.5	298	2.4	0	0.1825	2028	2009-2010	129.3333333	60	0	0	0	0	0	0	0	0	0	≥25	0	1	Female	60 and above years	Non-Hispanic White	High School	Married or living with a partner	2	Never	2400	Medium activity
58702	2	81	76	156	12	15	25	3.7	9.6	3.2	91	5.051	12.11	72.66	5.6	75	74	1.7	0.5	3	263	3.7	0	0	2095	2009-2010	134.6666667	43.33333333	0	0	0	0	0	0	0	0	0	<25	0	0	Female	60 and above years	Non-Hispanic White	High School	Married or living with a partner	4	Current	0	Inactive
58708	1	75	97	135	25	14	19	4.2	9.4	2.9	95	5.273	6.04	36.24	5.8	87	46	1.7	0.4	4.6	185	15	0	0.373	2028	2009-2010	110.6666667	69.33333333	0	0	0	0	0	0	0	0	0	<25	0	0	Male	60 and above years	Mexican American	Middle school or lower	Married or living with a partner	1	Current	0	Inactive
58712	2	86	100.7	73	68	29	28	4.3	9.4	2.8	89	4.94	7	42	5.4	146	94	1.1	0.4	4	201	22.5	0	0.0735	1824.5	2009-2010	143	77	0	0	0	1	1	1	0	0	1	≥25	1	0	Female	60 and above years	Non-Hispanic White	High School	Widowed/Divorced/Separated	1	Never	0	Inactive
58748	2	77	84	53	4	14	19	3.7	9.1	2.6	88	4.885	6.29	37.74	5.1	102	61	1.4	0.5	3.7	210	6.1	0	0	2435	2009-2010	100.6666667	68.66666667	0	0	0	0	0	0	0	0	0	<25	0	0	Female	40-59 years	Non-Hispanic White	High School	Married or living with a partner	4	Current	3240	Medium activity
58754	1	76	87.1	94	16	12	20	4.5	9.3	2.6	94	5.218	4.47	26.82	5.1	44	65	1.7	0.7	3.1	188	0.4	39	0.528	2419	2009-2010	96.66666667	52.66666667	0	0	0	0	0	0	0	1	0	<25	0	0	Female	20-39 years	Non-Hispanic White	High School	Never Married	4	Current	1560	Low activity
58783	1	85	85.7	40	14	14	19	4.2	9.2	2.9	84	4.663	19.28	115.68	5.4	105	51	2.7	0.4	3.3	236	188	0	0.0535	597.5	2009-2010	100.6666667	59.33333333	0	0	0	0	0	0	0	0	0	<25	0	0	Female	20-39 years	Non-Hispanic Black	High School	Never Married	2	Never	6960	High activity
58812	1	79	81.2	87	7	13	19	4.6	9.8	2.7	82	4.552	3.28	19.68	5.4	97	49	2.2	0.4	3.9	407	12.4	11.7	0.0225	1474	2009-2010	101.3333333	64	0	0	0	0	0	0	0	0	0	<25	0	0	Female	20-39 years	Non-Hispanic White	College or above	Married or living with a partner	3	Never	2960	Medium activity
58822	1	75	92.9	40	33	16	14	4.2	8.8	2.6	103	5.718	5.23	31.38	5.7	126	50	1.8	0.3	3.7	259	5.7	0	0.002	1256.5	2009-2010	116	66	0	0	0	0	0	0	0	0	0	≥25	0	0	Female	60 and above years	Mexican American	High School	Widowed/Divorced/Separated	1	Never	400	Low activity
58834	2	76	86	54	10	9	17	3.6	9.3	2.9	88	4.885	4.63	27.78	5.5	78	52	1.5	0.6	4	408	7.5	0	0.5745	1617	2009-2010	140.6666667	48	0	0	0	0	0	0	0	0	0	<25	0	0	Female	60 and above years	Non-Hispanic White	High School	Widowed/Divorced/Separated	4	Never	0	Inactive
58852	1	83	88.4	24	22	21	32	4.3	8.7	2.7	98	5.44	3.12	18.72	5.8	98	79	1.6	0.4	2	164	2.2	0	0.2155	2532	2009-2010	110.6666667	75.33333333	0	0	0	0	0	0	0	0	0	<25	0	0	Male	40-59 years	Non-Hispanic White	College or above	Married or living with a partner	4	Never	1920	Medium activity
58859	1	82	101	193	43	24	21	4.3	9.3	3.3	103	5.718	22.87	137.22	5.5	0	42	2.1	0.4	3.3	308	22.5	0	NA	0	2009-2010	111.3333333	75.33333333	0	0	0	1	1	1	0	0	1	≥25	1	0	Male	20-39 years	Mexican American	High School	Never Married	2	Never	7680	High activity
58862	1	75	85	66	14	24	21	3.8	9.1	3.9	90	4.996	7.18	43.08	5.2	91	56	2.2	0.6	4.7	242	6	0	0.0585	1920.5	2009-2010	104.6666667	60.66666667	0	0	0	0	0	0	0	0	0	<25	0	0	Female	20-39 years	Other Hispanic	High School	Married or living with a partner	4	Never	0	Inactive
58869	1	76	95.7	210	32	26	20	4.1	8.6	2.7	95	5.273	12.4	74.4	5.2	85	37	1.4	0.4	4.8	261	109.5	0	0.009	3497	2009-2010	150	105.3333333	0	0	0	1	1	1	0	0	1	≥25	1	1	Male	40-59 years	Mexican American	High School	Never Married	3	Never	640	Low activity
58871	2	76	102.2	166	17	13	18	3.9	9.3	2.5	117	6.495	7.05	42.3	6.6	281	50	1.2	0.4	4.6	193	19.4	0	0.065	1200	2009-2010	151.3333333	44.66666667	1	1	0	0	0	0	0	0	0	≥25	0	1	Female	60 and above years	Non-Hispanic White	Middle school or lower	Widowed/Divorced/Separated	2	Current	0	Inactive
58880	1	75	151	125	28	42	25	4	9	3.4	110	6.106	94.81	568.86	5.8	178	39	2.5	0.6	3.6	390	14.9	0	0.2045	2068.5	2009-2010	111.3333333	74	0	0	0	1	1	1	0	0	1	≥25	1	1	Female	20-39 years	Mexican American	High School	Married or living with a partner	1	Current	0	Inactive
58894	2	89	85.8	88	35	15	24	4.4	9.6	2.8	95	5.273	6.15	36.9	5.8	84	87	1.4	0.3	2.8	193	3.4	10.6	0.064	3076	2009-2010	148	74.66666667	0	0	0	0	0	0	0	0	0	<25	0	0	Male	60 and above years	Non-Hispanic Black	High School	Married or living with a partner	2	Current	4560	High activity
58926	2	85	108.5	234	28	37	33	4.2	9.6	3	107	5.94	23.45	140.7	5.8	132	43	2.2	0.5	4.1	263	3.9	21.8	0.018	1489.5	2009-2010	130	62.66666667	0	0	0	1	1	1	0	1	0	≥25	1	1	Female	40-59 years	Non-Hispanic White	High School	Widowed/Divorced/Separated	4	Never	1680	Low activity
58962	1	77	102.5	118	16	20	28	4.4	10.1	2.9	101	5.607	12.73	76.38	5.8	74	68	1.4	0.6	4.3	312	6.8	0.05	0.5135	2016.5	2009-2010	120.6666667	56	0	0	0	0	0	0	0	0	0	≥25	0	0	Female	60 and above years	Non-Hispanic White	High School	Married or living with a partner	1	Never	0	Inactive
58980	1	76	75.6	66	22	18	24	4.1	9.4	3.4	87	4.829	6.59	39.54	5.5	106	61	2.1	0.4	3.8	239	15	0	0.446	2379.5	2009-2010	142.6666667	79.33333333	0	0	0	0	0	0	0	0	0	<25	0	0	Female	40-59 years	Mexican American	High School	Never Married	3	Never	5640	High activity
58996	1	80	86.7	103	84	30	59	3.9	9.2	3	164	9.104	1	6	9.8	0	79	2	0.6	3.2	254	5.2	0	0.1025	2816	2009-2010	129.3333333	69.33333333	1	0	1	0	0	0	0	0	0	<25	0	0	Male	60 and above years	Non-Hispanic White	High School	Widowed/Divorced/Separated	3	Never	13860	High activity
58998	2	81	90.2	197	22	18	27	4.2	9.1	2.6	84	4.663	7.54	45.24	6.1	0	66	2.1	0.7	3.8	110	25.3	0	0.062	1215.5	2009-2010	145.3333333	60	1	1	1	0	0	0	0	0	0	≥25	0	1	Female	60 and above years	Non-Hispanic White	High School	Widowed/Divorced/Separated	3	Never	0	Inactive
58999	3	86	99.3	107	8	17	22	3.9	9.3	3.8	106	5.884	12.94	77.64	5.8	0	64	3	0.6	3.8	229	1.5	0	0.0465	2244.5	2009-2010	100	73.33333333	1	0	0	0	0	0	0	0	0	≥25	0	0	Female	40-59 years	Other Race-Including Multi-Racial	College or above	Married or living with a partner	4	Never	4800	High activity
59006	1	80	87.4	61	6	12	19	4.4	9.2	2.7	96	5.329	6.15	36.9	5.6	120	96	1.8	0.7	2.5	224	4.2	7.4	0.2485	1154	2009-2010	130.6666667	72	0	0	0	0	0	0	0	0	0	≥25	0	0	Female	40-59 years	Non-Hispanic White	High School	Widowed/Divorced/Separated	4	Never	720	Low activity
59023	2	80	110.8	144	17	18	26	3.8	9.1	4	115	6.384	18.62	111.72	6.1	138	61	1.7	0.6	3.2	213	13.3	0	0.1715	1558	2009-2010	132	59.33333333	0	1	0	1	1	1	0	0	1	≥25	1	1	Female	60 and above years	Non-Hispanic White	Middle school or lower	Married or living with a partner	2	Never	0	Inactive
59028	3	86	109	341	42	61	43	4.3	9.1	2.8	114	6.328	30.4	182.4	5.8	0	44	1.4	0.5	3	175	20.7	0	0.207	3271	2009-2010	134	92	1	0	0	1	1	1	0	0	1	≥25	1	1	Male	40-59 years	Mexican American	High School	Married or living with a partner	3	Never	3360	Medium activity
59052	1	83	91.3	77	10	13	13	4.3	9.3	2.5	94	5.218	5.03	30.18	5	106	50	1.7	0.3	3	230	1	21.05	0.0915	2417.5	2009-2010	112.6666667	70.66666667	0	0	0	0	0	0	0	1	0	≥25	0	0	Female	20-39 years	Non-Hispanic White	High School	Married or living with a partner	4	Never	1580	Low activity
59087	2	87	123.1	95	46	30	34	3.6	9.3	3.5	103	5.718	14.07	84.42	5.7	0	80	2.3	0.4	2.1	186	7.3	7.85	0.7615	1579	2009-2010	138	92	1	1	0	1	1	1	1	0	0	≥25	1	1	Female	40-59 years	Non-Hispanic Black	High School	Never Married	1	Current	280	Low activity
59109	1	87	94.7	228	18	30	29	3.8	9.1	3.1	83	4.607	15.87	95.22	6.5	0	40	2.3	0.5	3.3	234	34.7	0	0.003	1457	2009-2010	152.6666667	77.33333333	1	0	0	1	0	1	0	0	1	≥25	1	1	Male	60 and above years	Mexican American	Middle school or lower	Married or living with a partner	2	Current	9600	High activity
59133	1	87	90.2	188	29	32	30	4.3	9.7	3.5	124	6.883	6.66	39.96	5.9	216	42	2.9	1.4	8.2	236	80	0	0.1075	1647.5	2009-2010	131.3333333	73.33333333	1	0	0	0	0	0	0	0	0	<25	0	1	Male	60 and above years	Mexican American	Middle school or lower	Widowed/Divorced/Separated	3	Current	0	Inactive
59151	1	80	110.4	145	20	17	26	4.5	9.4	2.8	115	6.384	14.52	87.12	5.7	0	40	1.5	0.7	5.4	184	31	0	0.013	2255	2009-2010	156	74	0	1	1	1	1	1	0	0	1	≥25	1	1	Male	60 and above years	Non-Hispanic White	Middle school or lower	Married or living with a partner	2	Never	0	Inactive
59172	2	75	99.3	102	21	26	24	3.8	9.5	2.4	92	5.107	9.72	58.32	4.9	86	44	1.6	0.5	5.1	211	4.1	0	0	1493	2009-2010	99.33333333	62	0	0	0	0	0	0	0	0	0	≥25	0	0	Female	20-39 years	Non-Hispanic White	High School	Never Married	1	Never	2400	Medium activity
59174	1	88	82.8	185	34	16	21	4.5	9.6	3.4	87	4.829	8.05	48.3	5.7	113	78	2.1	0.4	2.9	340	8.7	0.1	0.25	2107	2009-2010	102	64.66666667	0	0	0	0	0	0	0	0	0	<25	0	0	Female	20-39 years	Mexican American	High School	Married or living with a partner	4	Never	1680	Low activity
59199	1	78	96	221	67	20	26	4.1	9.7	4.6	114	6.328	11.86	71.16	6.2	187	36	2.7	1.1	5.6	381	108.6	0	0.077	803.5	2009-2010	135.3333333	60.66666667	0	0	0	1	1	1	0	0	1	<25	1	1	Male	60 and above years	Other Hispanic	High School	Married or living with a partner	1	Never	0	Inactive
59206	2	81	133.6	57	23	31	24	4.4	10.1	2.2	120	6.661	27.26	163.56	6.7	0	49	1.6	0.7	6.4	293	17.7	0	0.6865	3278.5	2009-2010	139.3333333	83.33333333	1	0	0	1	1	1	0	0	1	≥25	1	1	Male	40-59 years	Non-Hispanic White	College or above	Never Married	4	Current	0	Inactive
59210	1	86	80.8	72	21	20	26	4.7	9.3	2.5	99	5.495	8.89	53.34	5.1	140	65	1.1	0.4	3.6	117	20.4	0.3	0	1526.5	2009-2010	96	72	0	0	0	0	0	0	0	0	0	<25	0	0	Female	40-59 years	Non-Hispanic White	High School	Never Married	1	Current	0	Inactive
59232	2	76	100.7	76	42	21	21	4	9.1	2.7	107	5.94	9.81	58.86	5.7	85	53	0.8	0.5	5.3	227	3.7	16.75	0.2095	2688	2009-2010	120.6666667	62.66666667	0	0	0	1	0	1	0	0	1	≥25	1	0	Male	60 and above years	Non-Hispanic White	Middle school or lower	Married or living with a partner	2	Current	5760	High activity
59237	2	79	125.7	95	21	18	23	5	9.3	2	109	6.051	11.93	71.58	5.6	170	48	1.5	0.3	3.6	214	6.3	7.55	0.155	1781	2009-2010	143	77	0	0	0	1	1	1	0	0	1	≥25	1	0	Male	40-59 years	Non-Hispanic White	High School	Married or living with a partner	3	Never	960	Low activity
59251	2	80	81.5	185	12	11	25	4.1	9.4	2.7	130	7.216	20.73	124.38	5.4	79	39	2.6	0.5	5.4	276	4.2	0	0.3185	1808.5	2009-2010	100	62	1	0	0	0	0	0	1	0	0	<25	0	1	Female	40-59 years	Non-Hispanic White	Middle school or lower	Widowed/Divorced/Separated	1	Current	7800	High activity
59273	1	76	104.7	77	18	22	21	4.4	9.1	2.4	103	5.718	8.23	49.38	5.2	111	53	2.1	0.5	4.5	295	32.2	21.75	0.1945	2893.5	2009-2010	124.6666667	66.66666667	0	0	0	0	0	0	0	1	0	≥25	0	0	Female	40-59 years	Non-Hispanic White	High School	Widowed/Divorced/Separated	3	Never	9840	High activity
59300	1	83	85.4	70	39	40	25	4.7	9.4	2.9	106	5.884	24.69	148.14	5.3	133	55	2.3	0.5	5.5	286	5.2	0	0.0675	2130	2009-2010	126	64	0	0	0	1	0	1	0	0	1	≥25	1	0	Male	20-39 years	Mexican American	Middle school or lower	Never Married	3	Current	16800	High activity
59304	2	81	137.2	116	25	19	24	3.9	9.2	4.2	111	6.162	49.73	298.38	6.3	0	40	2.6	0.4	4	262	31.8	42.1	0.242	2628	2009-2010	111.3333333	64.66666667	1	0	0	1	1	1	0	1	0	≥25	1	0	Male	40-59 years	Non-Hispanic Black	High School	Never Married	1	Never	12000	High activity
59332	2	82	93	125	20	17	28	4.2	9.3	3.4	89	4.94	8.85	53.1	5.6	98	61	3.1	0.8	2.6	208	70	0	0.092	749.5	2009-2010	174.6666667	66.66666667	0	0	0	0	0	0	0	0	0	≥25	0	0	Female	60 and above years	Other Hispanic	Middle school or lower	Widowed/Divorced/Separated	1	Never	480	Low activity
59334	2	75	108.2	83	20	25	18	4.5	9.5	2.6	97	5.384	10.28	61.68	5.4	92	45	1.4	0.7	3.7	225	1.7	0	0.2695	1809	2009-2010	103.3333333	65.33333333	0	0	0	0	1	1	0	0	0	≥25	0	0	Male	40-59 years	Non-Hispanic White	High School	Married or living with a partner	3	Current	1920	Medium activity
59372	1	77	95.7	78	5	18	22	3.8	8.9	2.6	86	4.774	5.37	32.22	5.4	63	97	1.8	0.4	3.1	179	2.5	0	0.198	1045.5	2009-2010	115.3333333	65.33333333	0	0	0	0	0	0	0	0	0	≥25	0	0	Female	40-59 years	Non-Hispanic White	High School	Widowed/Divorced/Separated	4	Never	900	Low activity
59379	2	86	76.5	108	27	27	25	4.4	9.4	2.8	95	5.273	3.49	20.94	5.5	82	71	1.1	0.3	2.1	200	1.9	10.6	0.38	2257.5	2009-2010	122	68.66666667	0	0	0	0	0	0	0	0	0	<25	0	0	Male	40-59 years	Non-Hispanic White	High School	Married or living with a partner	4	Never	2200	Medium activity
59391	2	77	101.2	101	22	33	33	4.7	9.4	2.6	119	6.606	14.04	84.24	4.9	103	38	2.4	0.7	2.4	154	12	26.5	0.2025	3810	2009-2010	146	86	0	0	0	1	0	1	0	0	1	≥25	1	1	Male	60 and above years	Non-Hispanic White	High School	Married or living with a partner	4	Never	7000	High activity
59418	2	76	91.5	54	24	31	33	4.4	9.3	3	108	5.995	6.51	39.06	5.4	99	53	1.5	0.6	3.9	276	4.5	7	0	2106.5	2009-2010	108.6666667	80.66666667	0	0	0	0	0	0	0	0	0	≥25	0	0	Male	40-59 years	Non-Hispanic White	High School	Married or living with a partner	3	Never	19440	High activity
59420	2	77	96.4	82	106	27	34	4.4	9.9	3.5	139	7.716	18.59	111.54	6.4	156	71	0.8	0.8	4.3	217	6	0	0.093	2075	2009-2010	127.3333333	63.33333333	1	0	0	1	1	1	0	0	1	≥25	1	0	Male	60 and above years	Non-Hispanic White	High School	Widowed/Divorced/Separated	3	Current	360	Low activity
59460	2	81	80.6	190	24	21	22	3.9	9.2	2.6	82	4.552	2.54	15.24	5.6	99	59	1.6	0.6	2.7	327	6.6	84.2	0.237	4031	2009-2010	91.33333333	57.33333333	0	0	0	0	0	0	0	1	0	<25	0	0	Male	40-59 years	Other Race-Including Multi-Racial	Middle school or lower	Married or living with a partner	1	Current	10200	High activity
59461	3	86	99	219	26	28	29	4.4	9.9	3.2	109	6.051	15.39	92.34	5.5	94	52	2	0.6	4.5	249	5.2	63.6	0.0875	3198	2009-2010	116	58	0	0	0	1	1	1	0	1	0	≥25	1	0	Male	60 and above years	Mexican American	Middle school or lower	Married or living with a partner	1	Never	0	Inactive
59463	2	75	109	78	15	21	20	4.1	8.8	2.6	91	5.051	29.03	174.18	4.8	137	61	1.6	0.4	3.8	321	10.6	0	0.166	1786.5	2009-2010	139.3333333	74	0	0	0	1	1	1	0	0	1	≥25	1	0	Female	40-59 years	Non-Hispanic White	High School	Married or living with a partner	2	Never	0	Inactive
59471	1	76	90.8	64	26	20	18	4.4	9.9	3.2	105	5.829	12.85	77.1	6	114	64	2.2	0.9	8.6	353	5.6	0	0.799	1267.5	2009-2010	104.6666667	62	0	0	0	0	0	0	0	0	0	≥25	0	0	Female	40-59 years	Non-Hispanic White	College or above	Widowed/Divorced/Separated	1	Current	0	Inactive
59480	2	88	91	86	19	21	26	4.3	9.4	3.3	107	5.94	9.89	59.34	5.9	0	85	2	0.3	3.2	264	4.2	0	0.007	1352.5	2009-2010	148.6666667	66.66666667	1	0	0	0	0	0	1	0	0	≥25	0	1	Female	60 and above years	Mexican American	Middle school or lower	Widowed/Divorced/Separated	2	Never	0	Inactive
59497	2	83	131	109	14	23	22	3.7	9	2.9	105	5.829	22.74	136.44	5.8	188	41	1.6	0.4	4.3	234	4.2	0	0.1995	2762.5	2009-2010	125.3333333	80	0	0	0	1	1	1	0	0	1	≥25	1	0	Male	40-59 years	Non-Hispanic White	College or above	Married or living with a partner	2	Never	0	Inactive
59502	2	78	99	127	17	13	18	3.8	9.2	2.3	86	4.774	11.22	67.32	5.8	103	75	1.1	0.3	2.7	169	2.9	0	0.0185	1294.5	2009-2010	108	66.66666667	0	0	0	0	1	1	0	0	0	≥25	0	0	Female	60 and above years	Other Hispanic	Middle school or lower	Married or living with a partner	1	Never	0	Inactive
59521	1	81	85.9	133	46	81	53	4.5	9.6	3.7	95	5.273	9.37	56.22	5.4	0	43	1.8	0.4	2.6	227	1.3	0	0.001	2850	2009-2010	133.3333333	76.66666667	0	0	0	0	0	0	0	0	0	<25	0	0	Male	40-59 years	Mexican American	College or above	Married or living with a partner	3	Never	5880	High activity
59539	2	82	99.5	233	30	33	29	5	9.5	2.1	111	6.162	8.02	48.12	5.4	96	54	2.5	0.6	4.5	333	17.1	0	2.062	3601	2009-2010	116	78	0	0	0	0	1	1	0	0	0	≥25	0	0	Male	40-59 years	Non-Hispanic White	High School	Married or living with a partner	2	Current	6240	High activity
59545	1	84	94.2	60	20	16	22	4.3	9.4	2.5	105	5.829	11.12	66.72	5.8	86	62	2.4	0.4	2.2	198	7.3	0	0.045	1987	2009-2010	107.3333333	48.66666667	0	0	0	0	0	0	0	0	0	≥25	0	0	Female	20-39 years	Non-Hispanic Black	High School	Never Married	1	Current	1440	Low activity
59555	1	76	115.8	212	15	22	24	4.4	9.5	2.4	113	6.273	15.6	93.6	5.6	164	55	2.1	0.4	2.9	193	3.1	0	0.092	1659.5	2009-2010	101.3333333	46	0	1	0	1	1	1	0	0	1	≥25	1	1	Female	60 and above years	Other Race-Including Multi-Racial	Middle school or lower	Widowed/Divorced/Separated	1	Current	0	Inactive
59563	1	76	102.2	308	44	52	29	4.5	9.4	3	99	5.495	10.99	65.94	4.6	134	29	1.9	0.4	2.8	206	3.5	0	0.019	2840.5	2009-2010	100.6666667	68	0	0	0	0	1	1	0	0	0	≥25	0	1	Male	20-39 years	Non-Hispanic White	High School	Married or living with a partner	3	Never	360	Low activity
59588	1	75	114.5	226	42	35	28	4.8	9.6	2.6	105	5.829	19.15	114.9	5.7	125	60	3.2	0.4	3.6	300	30	0	0.057	1976	2009-2010	133.3333333	78.66666667	0	0	0	1	1	1	0	0	1	≥25	1	1	Female	40-59 years	Mexican American	Middle school or lower	Married or living with a partner	4	Current	0	Inactive
59601	2	79	103.6	156	12	29	25	4.6	9.7	3	87	4.829	15.52	93.12	5.3	86	41	3.1	0.4	3.2	245	15.1	0	0.066	1364	2009-2010	115.3333333	61.33333333	0	0	0	0	1	1	0	0	0	≥25	0	0	Male	20-39 years	Non-Hispanic Black	High School	Never Married	4	Never	15360	High activity
59622	1	76	91.4	209	12	23	27	4.3	9.4	3.2	87	4.829	9.16	54.96	5.6	107	59	1.8	0.5	3.2	299	92.3	0	0.1375	1081	2009-2010	139.3333333	76.66666667	0	0	0	0	0	0	0	0	0	≥25	0	1	Female	60 and above years	Mexican American	High School	Widowed/Divorced/Separated	3	Never	0	Inactive
59623	1	82	83.1	147	11	15	17	4.1	9.4	3.3	89	4.94	5.78	34.68	4.7	97	49	2.4	0.4	3.3	359	18.7	0	0.134	3247	2009-2010	105	60	0	0	0	0	0	0	0	0	0	≥25	0	0	Female	20-39 years	Other Hispanic	High School	Never Married	3	Never	240	Low activity
59692	2	77	96.4	107	11	20	23	4.2	9.5	2.8	86	4.774	7.49	44.94	6	0	40	0.8	0.4	4.9	179	5.1	0	0.364	1613	2009-2010	104	54.66666667	1	0	0	0	0	0	0	0	0	≥25	0	0	Male	60 and above years	Non-Hispanic White	High School	Never Married	2	Current	4320	High activity
59704	2	76	106.5	175	14	17	25	4.1	9.8	2.9	144	7.993	13.27	79.62	6.4	174	46	2	0.5	4.1	240	7	0	0.07	1505.5	2009-2010	122	49.33333333	1	1	0	1	1	1	0	0	1	≥25	1	1	Male	60 and above years	Non-Hispanic White	Middle school or lower	Widowed/Divorced/Separated	1	Current	0	Inactive
59744	1	79	80.5	62	19	33	26	4.7	9.6	2.9	105	5.829	6.11	36.66	4.9	100	38	1.3	0.7	3.9	231	17.6	0.1	0.043	2094.5	2009-2010	118	64.66666667	0	0	0	0	0	0	0	0	0	<25	0	0	Male	20-39 years	Non-Hispanic White	College or above	Married or living with a partner	4	Never	1680	Low activity
59746	3	86	97.6	73	17	19	19	4.3	9.3	3.7	99	5.495	11.39	68.34	5.8	114	51	2	0.9	5.7	287	11.4	0	0	2542	2009-2010	110.6666667	70.66666667	0	0	0	0	0	0	0	0	0	≥25	0	0	Female	40-59 years	Mexican American	Middle school or lower	Married or living with a partner	1	Current	3180	Medium activity
59767	1	85	113.7	146	32	22	17	4	9.4	3.8	105	5.829	27.42	164.52	5.7	130	44	2.5	0.5	4.2	269	23.2	0	0.014	2296.5	2009-2010	108.6666667	59.33333333	0	0	0	1	1	1	0	0	1	≥25	1	0	Male	20-39 years	Other Race-Including Multi-Racial	College or above	Married or living with a partner	2	Never	2160	Medium activity
59771	2	76	104.1	82	18	14	14	3.6	8.6	3.3	104	5.773	17.58	105.48	5.4	109	33	1.4	1.2	6.7	126	4.7	0	1.149	2336	2009-2010	104	48	0	0	0	1	0	1	0	0	1	≥25	1	1	Male	60 and above years	Non-Hispanic White	High School	Married or living with a partner	2	Current	0	Inactive
59772	2	86	82.5	47	13	18	17	4.7	9.7	2.4	91	5.051	4.32	25.92	5.3	0	67	2.5	0.7	5.3	255	1.1	18.7	0.0835	2980.5	2009-2010	108	58	0	0	0	0	0	0	0	0	0	<25	0	0	Male	20-39 years	Mexican American	High School	Never Married	1	Former	8480	High activity
59783	2	78	93.3	52	30	20	22	4.3	9.4	2.9	78	4.33	6.14	36.84	5.6	110	58	2.4	0.6	5.6	363	12.9	0	0.237	1249.5	2009-2010	108.6666667	66	0	0	0	0	0	0	0	0	0	≥25	0	0	Female	20-39 years	Other Hispanic	High School	Never Married	2	Never	160	Low activity
59794	1	83	96.2	77	25	21	17	4.3	9.1	3.4	115	6.384	15.13	90.78	6	123	42	1.3	0.5	4.1	238	1.9	0	0.0545	1865.5	2009-2010	114	74	0	0	0	1	0	1	0	0	1	<25	1	0	Male	20-39 years	Non-Hispanic White	High School	Married or living with a partner	2	Current	8640	High activity
59796	1	80	142.5	460	46	28	19	4.3	9.3	2.4	114	6.328	66.05	396.3	6.4	155	30	2.7	0.7	8.8	350	31	0	0.5365	1882.5	2009-2010	136	76.66666667	0	0	0	1	1	1	0	0	1	≥25	1	1	Male	40-59 years	Non-Hispanic White	Middle school or lower	Married or living with a partner	1	Current	1680	Low activity
59802	2	82	118.3	94	36	41	23	4.3	9.4	3.5	94	5.218	33.42	200.52	5.4	106	37	2.2	0.5	3.1	306	5.3	0	0.501	3214	2009-2010	126	81.33333333	0	0	0	1	1	1	0	0	1	≥25	1	0	Male	40-59 years	Non-Hispanic White	High School	Married or living with a partner	4	Current	1560	Low activity
59804	1	77	98.6	92	13	14	20	4.1	9.3	3.3	103	5.718	17.39	104.34	5.5	129	59	1.7	0.5	2.9	300	1.6	3.9	0.157	2574	2009-2010	105	76	0	0	0	0	0	0	0	0	0	≥25	0	0	Female	20-39 years	Non-Hispanic White	College or above	Never Married	4	Never	0	Inactive
59809	2	78	92.9	111	16	20	21	4.4	8.9	3.3	138	7.66	21.7	130.2	5	196	45	1.9	0.4	4.8	130	8.9	0	0.1675	1255.5	2009-2010	138.6666667	86	1	0	0	1	0	1	0	0	1	<25	1	0	Male	40-59 years	Other Hispanic	Middle school or lower	Married or living with a partner	1	Current	0	Inactive
59826	1	76	73.4	55	9	21	33	4.2	10.1	3.1	108	5.995	5.74	34.44	5.7	165	66	1.3	0.5	4	189	29.9	0	0.0305	1684	2009-2010	118.6666667	68.66666667	0	0	0	0	0	0	0	0	0	<25	0	0	Female	60 and above years	Non-Hispanic White	High School	Widowed/Divorced/Separated	4	Never	6720	High activity
59855	2	85	107.4	107	32	41	36	4.2	9.3	3.9	129	7.161	31.32	187.92	5.8	0	58	2.2	0.3	4.4	205	26.3	14.05	0.0255	1578.5	2009-2010	153.3333333	91.33333333	1	0	0	1	1	1	0	0	1	≥25	1	1	Female	40-59 years	Mexican American	Middle school or lower	Widowed/Divorced/Separated	2	Current	1920	Medium activity
59862	1	85	95.6	202	14	19	24	4.1	9	3	105	5.829	9.75	58.5	5.4	234	63	1.4	0.4	3.4	173	7.2	0	NA	0	2009-2010	123.3333333	24	1	1	0	0	0	0	0	0	0	≥25	0	1	Female	60 and above years	Other Hispanic	Middle school or lower	Widowed/Divorced/Separated	2	Current	0	Inactive
59865	2	77	112.3	177	14	29	32	4	9.5	3	95	5.273	10.66	63.96	5.6	151	43	1.7	0.6	5.7	174	3.1	13.05	0.0855	1998	2009-2010	126.6666667	72	0	0	0	0	1	1	0	0	0	≥25	0	1	Male	60 and above years	Non-Hispanic White	College or above	Married or living with a partner	4	Never	4320	High activity
59877	1	79	81.7	112	9	19	27	4.8	10.3	3.3	92	5.107	12.51	75.06	4.7	89	78	1.3	0.5	3.9	218	1	0	0.053	1406	2009-2010	110	68.66666667	0	0	0	0	0	0	0	0	0	<25	0	0	Female	20-39 years	Other Race-Including Multi-Racial	High School	Never Married	1	Never	9840	High activity
59882	1	82	81	56	27	30	27	4.1	9.8	3	96	5.329	6.82	40.92	5.7	95	72	1.8	0.4	2.5	189	1.2	0	0.246	1945	2009-2010	99.33333333	63.33333333	0	0	0	0	0	0	0	0	0	≥25	0	0	Female	40-59 years	Non-Hispanic Black	High School	Married or living with a partner	4	Never	4800	High activity
59895	2	86	89.6	153	31	32	29	3.8	9	3.5	105	5.829	13.58	81.48	6	192	46	1.6	0.4	2.6	317	15.9	0	0.019	1741	2009-2010	112	67.33333333	0	0	0	1	0	1	0	0	1	≥25	1	1	Female	40-59 years	Mexican American	High School	Married or living with a partner	1	Never	3000	Medium activity
59911	1	84	92	78	18	20	27	4.3	9.2	2.7	98	5.44	3.58	21.48	5.7	215	62	1.6	0.4	1.4	199	3.7	38.1	0.0035	1498	2009-2010	102	51.33333333	1	0	0	0	0	0	0	1	0	≥25	0	1	Female	60 and above years	Non-Hispanic White	High School	Married or living with a partner	4	Current	1200	Low activity
59921	1	89	103.8	113	12	20	26	4.2	9.6	2.8	98	5.44	12.55	75.3	5.5	172	71	2.2	0.5	3.4	232	5.6	0	0	925	2009-2010	115.3333333	55.33333333	0	0	0	1	0	1	0	0	1	≥25	1	0	Female	60 and above years	Mexican American	Middle school or lower	Widowed/Divorced/Separated	2	Never	6960	High activity
59922	1	77	89	83	11	12	19	4.1	9.3	2.6	83	4.607	4.19	25.14	5.8	68	57	2.7	0.6	4.6	201	8.7	0	0.426	1892.5	2009-2010	120	64.66666667	0	0	0	0	0	0	0	0	0	<25	0	0	Female	60 and above years	Non-Hispanic White	High School	Married or living with a partner	4	Current	540	Low activity
59959	2	75	107.5	77	10	19	21	4.3	9.1	3.1	105	5.829	18.43	110.58	5.3	119	48	1.9	0.5	3.1	235	8.4	0	0.3185	1558.5	2009-2010	106	54	0	0	0	0	0	0	0	0	0	≥25	0	0	Female	40-59 years	Non-Hispanic White	High School	Married or living with a partner	3	Current	6000	High activity
59968	1	76	91.6	126	11	18	20	4	9.4	2.4	92	5.107	10.67	64.02	5.4	83	54	2.1	0.6	2.5	190	4.9	7	0.263	2516.5	2009-2010	126	65.33333333	0	0	0	0	0	0	0	0	0	<25	0	0	Female	60 and above years	Non-Hispanic White	College or above	Married or living with a partner	3	Current	1920	Medium activity
59979	2	85	99.3	227	13	27	24	4.3	9.3	3.1	95	5.273	7.35	44.1	5.8	109	35	1.1	0.3	3	170	13.1	0	0	3503	2009-2010	116.6666667	74	0	0	0	0	0	0	0	0	0	≥25	0	0	Male	40-59 years	Non-Hispanic White	College or above	Married or living with a partner	2	Never	1400	Low activity
59984	2	83	80.2	162	18	23	33	4.3	9.9	2.8	81	4.496	8.28	49.68	5.4	85	46	1.6	0.3	2.7	189	2.8	0	0.4705	1333.5	2009-2010	121.3333333	73.33333333	0	0	0	0	0	0	0	0	0	<25	0	0	Female	40-59 years	Non-Hispanic White	Middle school or lower	Married or living with a partner	3	Current	4080	High activity
59985	1	84	104.3	137	40	19	22	4.3	9.5	2.9	103	5.718	9.22	55.32	5.9	0	62	0.8	0.2	3.3	282	8.2	0	0.155	862	2009-2010	144	66	1	0	0	0	1	1	0	0	0	≥25	0	1	Male	60 and above years	Non-Hispanic Black	High School	Married or living with a partner	3	Never	2160	Medium activity
59988	2	80	149	112	18	24	21	3.8	9.3	3.1	95	5.273	29.31	175.86	5.3	105	30	2.1	0.4	3.7	272	24.8	0	0.0355	1704.5	2009-2010	103	77	0	0	0	1	1	1	0	0	1	≥25	1	0	Female	20-39 years	Non-Hispanic White	High School	Married or living with a partner	1	Current	0	Inactive
59990	2	83	124.7	189	18	17	15	3.7	8.8	3.3	92	5.107	32.61	195.66	5.6	146	38	2.4	0.6	5.1	361	2	0	0.159	1479.5	2009-2010	123.3333333	74.66666667	0	0	0	1	1	1	0	0	1	≥25	1	1	Female	20-39 years	Mexican American	Middle school or lower	Married or living with a partner	1	Never	0	Inactive
59996	2	82	87.9	232	28	24	26	3.9	9	2.8	108	5.995	20.24	121.44	5.7	218	47	1.9	0.5	3.5	222	6.2	21.2	0.303	1778	2009-2010	132	68	1	0	0	1	0	1	0	1	0	≥25	1	1	Female	60 and above years	Non-Hispanic White	High School	Married or living with a partner	4	Never	0	Inactive
60004	2	78	98	129	10	17	19	4.6	9.3	2.9	94	5.218	6.24	37.44	5.6	112	45	1.9	0.4	2.2	196	2.9	0	0.071	1645.5	2009-2010	112.6666667	75.33333333	0	0	0	0	0	0	0	0	0	≥25	0	0	Female	60 and above years	Non-Hispanic White	High School	Widowed/Divorced/Separated	2	Never	360	Low activity
60011	1	87	94.4	79	17	14	21	4.5	9.1	2.5	127	7.05	4.9	29.4	7.6	0	51	1.9	0.6	2.4	215	13.8	14.05	0.003	818.5	2009-2010	152	68	1	0	0	0	0	0	0	0	0	≥25	0	0	Male	60 and above years	Mexican American	Middle school or lower	Married or living with a partner	3	Current	2640	Medium activity
60033	2	88	80.6	110	30	29	25	4.3	9.3	3.5	106	5.884	8.94	53.64	5.8	147	38	2	0.5	5.2	362	4.6	0	0.2975	2196.5	2009-2010	126.6666667	72	0	0	0	0	0	0	0	0	0	<25	0	0	Male	40-59 years	Mexican American	Middle school or lower	Married or living with a partner	1	Former	2160	Medium activity
60046	1	88	94	121	16	15	16	4.4	9.9	3.7	84	4.663	6.12	36.72	5.2	103	59	2.4	0.4	3.9	421	9.4	0	0.0695	1400	2009-2010	117.3333333	53.33333333	0	0	0	0	0	0	0	0	0	≥25	0	0	Female	20-39 years	Non-Hispanic Black	College or above	Widowed/Divorced/Separated	2	Never	840	Low activity
60072	2	84	106.9	129	9	22	20	3.8	9.6	2.4	94	5.218	9.42	56.52	5.6	95	59	1.3	0.6	3.1	239	15.1	23.1	0.0035	3184	2009-2010	121.3333333	63.33333333	0	0	0	0	1	1	0	1	0	≥25	0	0	Female	60 and above years	Non-Hispanic White	High School	Widowed/Divorced/Separated	2	Never	10980	High activity
60077	2	82	125.7	82	24	34	20	4.2	8.9	3.2	103	5.718	31.81	190.86	5	83	43	1.9	0.4	4.6	263	6.2	7.15	0.088	3101.5	2009-2010	122.6666667	74.66666667	1	0	0	1	1	1	0	0	1	≥25	1	0	Male	20-39 years	Other Hispanic	College or above	Married or living with a partner	2	Never	2100	Medium activity
60085	2	80	69.1	173	16	9	17	3.9	9.7	2.7	93	5.162	7.74	46.44	5.4	71	27	1.9	0.4	3.9	200	91.6	0	NA	0	2009-2010	104	65.33333333	0	0	0	0	0	0	0	0	0	<25	0	0	Female	20-39 years	Non-Hispanic White	Middle school or lower	Married or living with a partner	1	Current	0	Inactive
60088	1	78	96.6	105	16	18	22	4.4	9.5	3	148	8.215	11.48	68.88	6.9	0	58	1.5	0.4	4.6	276	8.2	15.6	0.1745	1456	2009-2010	126	66	1	0	0	0	0	0	0	0	0	≥25	0	1	Female	60 and above years	Other Hispanic	High School	Widowed/Divorced/Separated	3	Current	21000	High activity
60095	1	76	113.4	68	15	23	23	4.5	9.5	3	123	6.828	10.76	64.56	6.1	148	46	1.6	0.6	4.9	144	5.3	33.5	0.1835	2365.5	2009-2010	116.6666667	53.33333333	1	1	0	1	1	1	0	1	0	≥25	1	1	Male	60 and above years	Non-Hispanic White	High School	Married or living with a partner	3	Current	3600	High activity
60146	1	80	101.9	141	28	12	17	3.9	9.2	2.8	86	4.774	6.4	38.4	5.5	81	49	1.5	0.5	2.6	290	14.8	0	0.2475	1947.5	2009-2010	126.6666667	70	0	0	0	0	1	1	0	0	0	≥25	0	1	Female	60 and above years	Non-Hispanic White	High School	Widowed/Divorced/Separated	2	Current	960	Low activity
60152	2	78	93	105	10	16	19	4.2	9.1	3	105	5.829	6.06	36.36	5.2	101	44	1.8	0.5	3.5	203	14.4	0	0.007	4149	2009-2010	106.6666667	65.33333333	0	0	0	0	0	0	0	0	0	≥25	0	0	Male	40-59 years	Non-Hispanic White	College or above	Married or living with a partner	4	Never	680	Low activity
60154	1	83	81.1	144	37	16	20	4.8	9.6	3	89	4.94	3.93	23.58	5.1	82	81	1.3	0.3	1.8	325	9.2	40.3	0.3955	3259.5	2009-2010	124	68	0	0	0	0	0	0	0	1	0	<25	0	0	Female	60 and above years	Non-Hispanic White	Middle school or lower	Married or living with a partner	4	Current	0	Inactive
60169	2	88	95.4	112	8	21	22	3.9	8.9	3	90	4.996	7.81	46.86	5.6	112	45	1.9	0.5	2.7	256	20.7	0	0.111	1484.5	2009-2010	118	70.66666667	0	0	0	0	0	0	0	0	0	≥25	0	0	Female	20-39 years	Other Hispanic	Middle school or lower	Married or living with a partner	1	Never	1440	Low activity
60170	1	77	88.8	41	18	24	26	4.6	9.2	2.5	95	5.273	3.75	22.5	5.3	114	80	1.4	0.4	2.5	128	7	14.55	0.234	2391	2009-2010	132.6666667	82	0	0	1	0	0	0	0	0	0	<25	0	0	Male	60 and above years	Non-Hispanic White	College or above	Married or living with a partner	1	Never	960	Low activity
60176	2	88	104.2	149	17	38	27	4.1	9.5	2.7	101	5.607	19.06	114.36	5.9	128	44	2.9	0.4	3.3	295	1.6	0	0.0745	1032.5	2009-2010	110	73.33333333	0	0	0	1	1	1	0	0	1	≥25	1	1	Female	40-59 years	Other Hispanic	Middle school or lower	Married or living with a partner	2	Never	600	Low activity
60184	2	85	81.9	88	9	35	31	4.2	9.3	2.3	79	4.385	2.66	15.96	5	93	69	2.3	0.5	2.4	244	2.9	9.35	0.072	1765	2009-2010	96.66666667	40	0	0	0	0	0	0	0	0	0	<25	0	0	Female	60 and above years	Non-Hispanic White	College or above	Married or living with a partner	4	Current	2400	Medium activity
60194	2	82	89.8	91	27	39	32	4.6	9.9	3.4	91	5.051	8.07	48.42	4.7	111	53	1.6	1.2	6.7	221	7.7	0	0.1655	2817	2009-2010	132.6666667	81.33333333	0	0	0	0	0	0	1	0	0	≥25	0	0	Male	40-59 years	Non-Hispanic Black	Middle school or lower	Married or living with a partner	2	Current	5760	High activity
60195	1	77	92.4	72	19	28	33	4.6	10.1	2.8	118	6.55	12.81	76.86	5.9	127	41	1.1	0.4	2.7	236	2.6	0	0.0055	2370.5	2009-2010	140.6666667	64.66666667	0	0	0	1	0	1	0	0	1	<25	1	0	Male	60 and above years	Mexican American	High School	Married or living with a partner	4	Never	14400	High activity
60198	1	75	119.9	144	36	18	18	4.1	9.3	2.3	149	8.271	19.23	115.38	6.7	168	45	1.8	0.4	3	226	129.9	0	0.04	2575.5	2009-2010	152.6666667	82.66666667	1	1	0	1	1	1	0	0	1	≥25	1	1	Female	60 and above years	Other Hispanic	High School	Married or living with a partner	3	Never	2160	Medium activity
60214	1	83	80.5	171	39	26	30	4.4	9.5	3.1	98	5.44	5.33	31.98	5.6	128	55	1.9	0.4	2.1	157	5.3	18.75	0.0315	2718.5	2009-2010	106	69.33333333	0	0	0	0	0	0	0	0	0	<25	0	0	Male	20-39 years	Non-Hispanic Black	Middle school or lower	Widowed/Divorced/Separated	4	Never	3480	Medium activity
60217	1	79	160	65	101	25	25	4.2	9.5	2.4	94	5.218	21.13	126.78	5	125	47	2	0.4	4.9	189	3.4	0	0.2885	2210	2009-2010	138	73.33333333	0	1	0	1	1	1	0	0	1	≥25	1	0	Male	20-39 years	Non-Hispanic White	High School	Married or living with a partner	4	Current	4560	High activity
60221	1	82	96	77	87	72	38	4.2	9.5	2.6	102	5.662	8.47	50.82	5.6	102	33	2.5	0.5	4.3	287	6.6	0	0.2615	2053	2009-2010	96.66666667	56	0	0	0	1	0	1	0	0	1	<25	1	0	Male	20-39 years	Non-Hispanic White	High School	Married or living with a partner	3	Current	1200	Low activity
60223	1	77	102.8	136	78	37	24	4	9.3	2.3	115	6.384	5.02	30.12	5.9	123	74	1.3	0.7	3.1	250	12	33.7	0.0975	1869.5	2009-2010	118	67.33333333	0	0	0	0	1	1	0	1	0	≥25	0	0	Female	60 and above years	Non-Hispanic White	College or above	Never Married	4	Current	720	Low activity
60249	2	76	75.5	146	11	18	28	4.1	9.1	2.6	99	5.495	11.44	68.64	5.9	99	77	1.5	0.8	4.4	217	16.4	5.3	0.2145	1336.5	2009-2010	133.3333333	66.66666667	0	0	0	0	0	0	0	0	0	<25	0	0	Female	60 and above years	Non-Hispanic White	High School	Widowed/Divorced/Separated	2	Current	600	Low activity
60264	2	80	98.6	50	9	25	29	4.2	9.3	2.8	98	5.44	6.22	37.32	5.9	75	72	1.6	0.4	4.3	220	12.6	0	0.004	2229	2009-2010	107.3333333	58.66666667	0	0	0	0	0	0	0	0	0	≥25	0	0	Male	60 and above years	Non-Hispanic White	High School	Married or living with a partner	4	Never	9600	High activity
60296	1	83	107.7	142	34	22	28	4.3	9.3	2.9	112	6.217	14.15	84.9	5.6	189	61	2.4	0.6	2.8	257	144.3	41.15	0.062	1582.5	2009-2010	125.3333333	72	0	0	0	1	1	1	0	1	0	≥25	1	1	Female	40-59 years	Non-Hispanic White	College or above	Married or living with a partner	4	Never	480	Low activity
60316	2	85	106.4	162	11	14	23	3.7	9.3	3.6	132	7.327	8.38	50.28	6	0	41	1.7	1	7.8	250	63.2	0	0.0705	2389	2009-2010	157.3333333	72.66666667	1	1	0	0	1	1	0	0	0	≥25	0	1	Male	60 and above years	Other Hispanic	High School	Married or living with a partner	3	Never	0	Inactive
60347	1	76	100	76	68	38	28	4.2	9.4	2.3	109	6.051	20.12	120.72	5.6	159	51	2.1	0.5	4	169	3.9	57.1	0.1535	2561	2009-2010	108.6666667	73.33333333	0	0	0	1	1	1	0	1	0	≥25	1	0	Male	40-59 years	Non-Hispanic White	College or above	Widowed/Divorced/Separated	4	Never	1080	Low activity
60361	2	84	94.8	208	9	17	21	3.9	9.2	2.7	114	6.328	7.35	44.1	5.2	0	44	1.1	0.2	4.5	180	1725	5.6	0.142	1674	2009-2010	140	78.66666667	0	1	0	0	0	0	0	0	0	≥25	0	1	Female	60 and above years	Non-Hispanic White	High School	Widowed/Divorced/Separated	2	Current	0	Inactive
60364	1	78	112.4	63	41	35	38	4.3	9.7	2.7	139	7.716	12.34	74.04	6	183	56	1.1	0.3	3.4	158	12.7	0	0.128	1256	2009-2010	158	86	1	1	1	1	1	1	0	0	1	≥25	1	1	Male	60 and above years	Non-Hispanic Black	Middle school or lower	Married or living with a partner	3	Never	0	Inactive
60418	1	86	78.2	53	16	45	50	4.4	9.6	2.9	85	4.718	9.83	58.98	4.9	70	58	1.7	0.3	2.5	140	1.6	15.15	0.203	2094.5	2009-2010	102	51.33333333	0	0	0	0	0	0	0	0	0	<25	0	0	Female	20-39 years	Other Hispanic	College or above	Never Married	1	Never	2160	Medium activity
60427	1	80	131.5	112	49	28	21	3.6	9.4	4.2	187	10.38	20.6	123.6	8.4	0	38	2.3	0.3	5.5	238	11.4	0	0.016	2929.5	2009-2010	122.6666667	67.33333333	1	0	0	1	1	1	0	0	1	≥25	1	1	Female	40-59 years	Non-Hispanic White	High School	Never Married	2	Current	360	Low activity
60431	1	88	85.9	71	15	11	12	4.2	9	2.8	97	5.384	21.99	131.94	5.2	94	62	1.6	0.4	3.8	261	10.3	1.9	0.234	2451	2009-2010	106	61.33333333	0	0	0	0	0	0	0	0	0	<25	0	0	Female	20-39 years	Other Hispanic	College or above	Married or living with a partner	4	Never	2880	Medium activity
60436	2	77	78.6	75	14	17	20	4	9.7	3.3	90	4.996	9.04	54.24	5.2	0	71	1.8	0.5	6.6	290	8.8	0	0.042	1096	2009-2010	111.3333333	60.66666667	0	0	0	0	0	0	0	0	0	<25	0	0	Female	20-39 years	Other Hispanic	High School	Never Married	1	Never	15780	High activity
60440	1	77	74.4	54	23	25	25	4.6	9.6	2.8	106	5.884	2.85	17.1	5.2	104	81	1.5	0.5	2.9	217	7.1	7.8	0.242	2864	2009-2010	120.6666667	74	0	0	0	0	0	0	0	0	0	<25	0	0	Female	40-59 years	Non-Hispanic White	College or above	Married or living with a partner	4	Never	4560	High activity
60442	1	86	119.1	129	23	19	19	3.7	9	2.9	105	5.829	10.7	64.2	5.3	105	48	1.7	0.6	3.9	340	181.5	0.1	0.778	1515	2009-2010	103.3333333	64	0	0	0	1	1	1	0	0	1	≥25	1	0	Female	20-39 years	Non-Hispanic White	College or above	Never Married	3	Current	240	Low activity
60444	1	82	84.3	145	659	63	55	4	9.7	4.2	140	7.771	5.17	31.02	6.2	0	63	1.8	0.9	6.6	113	850	0	0.001	1514.5	2009-2010	196	69.33333333	1	1	1	1	1	1	0	0	1	<25	1	0	Female	60 and above years	Mexican American	Middle school or lower	Widowed/Divorced/Separated	3	Never	0	Inactive
60457	2	82	86.4	161	24	18	27	4.6	9.7	2.5	100	5.551	9.16	54.96	5.2	86	69	1.4	0.4	3.9	283	11.8	0	0.1605	1684	2009-2010	133.3333333	87.33333333	0	0	0	0	0	0	0	0	0	<25	0	0	Male	40-59 years	Other Hispanic	College or above	Widowed/Divorced/Separated	2	Current	2500	Medium activity
60471	2	78	100.7	106	69	19	23	4.2	9.3	3.2	344	19.095	8.65	51.9	11.8	0	77	3.4	0.5	3.3	372	5	0	0.0765	1868	2009-2010	120.6666667	74.66666667	1	0	0	1	1	1	0	0	1	≥25	1	1	Female	60 and above years	Non-Hispanic Black	Middle school or lower	Widowed/Divorced/Separated	2	Current	960	Low activity
60477	1	75	120.8	78	26	19	20	4	9.4	2.6	114	6.328	14.48	86.88	6	239	38	1.5	0.6	5.9	283	9.7	0	0.2975	1573.5	2009-2010	147.3333333	59.33333333	1	0	0	1	1	1	0	0	1	≥25	1	1	Male	60 and above years	Mexican American	Middle school or lower	Widowed/Divorced/Separated	3	Current	60	Low activity
60494	2	78	92.2	203	45	19	23	4.2	9.3	2.7	90	4.996	5.29	31.74	5.5	130	40	2.1	0.3	3.5	208	1.6	0	NA	0	2009-2010	118.6666667	53.33333333	0	0	0	0	1	1	0	0	0	≥25	0	0	Male	20-39 years	Other Hispanic	Middle school or lower	Married or living with a partner	1	Current	0	Inactive
60508	2	88	90.6	74	20	24	26	3.8	9.1	3.7	96	5.329	51.69	310.14	5.6	0	53	3	0.5	5.7	326	12	0	0.0325	2180.5	2009-2010	104	45.33333333	0	0	0	1	0	1	0	0	1	≥25	1	0	Female	20-39 years	Mexican American	Middle school or lower	Married or living with a partner	1	Current	3360	Medium activity
60513	1	75	99.3	107	45	68	57	4.2	9.5	4	88	4.885	11.64	69.84	5.4	0	88	1.9	0.6	4.1	275	101	0	0.124	1870.5	2009-2010	139.3333333	71.33333333	0	0	0	1	0	1	0	0	1	<25	1	0	Male	60 and above years	Non-Hispanic White	College or above	Widowed/Divorced/Separated	2	Current	0	Inactive
60516	2	75	106.5	95	144	20	29	4.4	9.5	3	100	5.551	8.31	49.86	5.3	74	66	1.9	0.6	5.3	185	14.9	231.15	0.3195	3467	2009-2010	140.6666667	60	0	0	0	1	1	1	0	1	0	≥25	1	0	Male	60 and above years	Non-Hispanic White	Middle school or lower	Widowed/Divorced/Separated	1	Current	0	Inactive
60517	2	76	97.9	139	62	61	34	4.3	9.4	3	107	5.94	5.34	32.04	5.3	92	43	1.9	0.3	3.2	186	5.2	32.7	0.2375	2014.5	2009-2010	114.6666667	78	0	0	0	0	1	1	0	1	0	≥25	0	0	Male	40-59 years	Other Hispanic	College or above	Married or living with a partner	4	Current	2240	Medium activity
60526	1	78	94	56	475	290	234	4.8	9.6	3.7	109	6.051	10.47	62.82	5.6	91	96	2.1	0.6	3.9	195	28	56.15	0	3530	2009-2010	120.6666667	62	0	0	0	1	1	1	0	1	0	≥25	1	0	Male	20-39 years	Mexican American	Middle school or lower	Married or living with a partner	2	Current	2160	Medium activity
60562	2	78	98.3	124	13	28	29	4.3	9.1	2.4	100	5.551	5.97	35.82	5	108	48	1.5	0.4	2.5	107	0.9	0	0.0735	1418.5	2009-2010	140.6666667	88	0	0	0	0	0	0	1	0	0	≥25	0	0	Male	40-59 years	Non-Hispanic Black	College or above	Married or living with a partner	2	Never	1920	Medium activity
60564	1	76	84.6	195	13	10	18	3.6	9.3	3.3	99	5.495	4.23	25.38	5.4	129	32	2.3	0.5	7	363	7	0	0.134	1824.5	2009-2010	108	69.33333333	0	0	0	0	0	0	0	0	0	<25	0	0	Female	60 and above years	Non-Hispanic White	High School	Widowed/Divorced/Separated	2	Current	1680	Low activity
60571	2	89	95.4	66	14	11	17	3.6	9.2	3.4	85	4.718	16.09	96.54	5.2	99	50	2.2	0.4	2.8	280	4.2	0	0.142	1688	2009-2010	101.3333333	64.66666667	0	0	0	0	0	0	0	0	0	≥25	0	0	Female	20-39 years	Non-Hispanic Black	College or above	Married or living with a partner	1	Never	960	Low activity
60577	2	75	111.6	155	15	20	20	4.2	9	3.2	98	5.44	16	96	5.7	100	60	2.3	0.5	2.9	192	5.6	0	0.1225	1072.5	2009-2010	104	65	0	0	0	1	1	1	1	0	0	≥25	1	0	Female	60 and above years	Mexican American	Middle school or lower	Widowed/Divorced/Separated	1	Current	10560	High activity
60594	1	86	65.9	131	11	13	19	4.7	10	2.4	97	5.384	10.62	63.72	5.5	87	56	2.6	0.4	3.6	137	4	10.9	0.148	1768	2009-2010	102	72.66666667	0	0	0	0	0	0	0	0	0	<25	0	0	Male	20-39 years	Other Race-Including Multi-Racial	High School	Never Married	3	Current	3600	High activity
60601	2	86	111.2	326	199	73	79	4.6	9.9	3.4	185	10.269	23.14	138.84	9.1	0	32	1.7	0.4	3.5	178	32	0	0.196	2656	2009-2010	126	82.66666667	1	0	0	1	1	1	0	0	1	≥25	1	1	Male	40-59 years	Other Hispanic	College or above	Never Married	4	Former	1800	Medium activity
60605	1	88	93.2	80	29	29	26	4.5	9	3.2	107	5.94	9.13	54.78	5.5	52	62	1.8	0.4	3.2	236	2.6	0	0.1255	3001.5	2009-2010	121.3333333	68.66666667	0	0	0	0	0	0	0	0	0	<25	0	0	Male	20-39 years	Mexican American	High School	Married or living with a partner	1	Never	13920	High activity
60616	1	80	82.2	558	22	15	23	4.6	9.8	2.9	87	4.829	11.33	67.98	5.2	53	51	1.8	0.5	3.7	283	7.8	168.4	0.426	3513	2009-2010	125.3333333	69.33333333	0	0	0	0	0	0	0	1	0	<25	0	0	Male	20-39 years	Non-Hispanic White	High School	Widowed/Divorced/Separated	2	Current	300	Low activity
60629	2	75	96	61	23	27	22	4.1	9.3	2.7	113	6.273	10.54	63.24	6.3	76	70	2.1	0.5	2.7	215	4.3	0	0.0365	968	2009-2010	112	66	0	0	0	0	0	0	0	0	0	≥25	0	1	Female	60 and above years	Non-Hispanic Black	High School	Married or living with a partner	3	Never	1320	Low activity
60630	2	82	83.8	89	9	16	16	4.5	9.6	2.8	84	4.663	13.24	79.44	4.9	133	76	1.5	0.6	4.4	237	13.8	36.4	0.1665	1816.5	2009-2010	114	60.66666667	0	0	0	0	0	0	0	1	0	≥25	0	0	Female	20-39 years	Non-Hispanic White	High School	Married or living with a partner	2	Never	1680	Low activity
60643	1	86	102.5	193	19	22	22	4.4	9.6	2.9	243	13.489	8.86	53.16	9.9	0	48	1.7	0.3	2	141	2.5	0	0.002	1097	2009-2010	136	74.66666667	1	1	0	1	1	1	0	0	1	≥25	1	1	Female	60 and above years	Non-Hispanic White	Middle school or lower	Widowed/Divorced/Separated	1	Never	0	Inactive
60670	2	76	101.4	134	31	31	24	4.4	9.7	2.6	98	5.44	14.62	87.72	5.6	97	49	2.1	0.8	3.8	153	3.8	58.5	0.056	3341.5	2009-2010	134	60.66666667	0	0	0	1	1	1	0	1	0	≥25	1	0	Male	20-39 years	Non-Hispanic White	High School	Married or living with a partner	4	Current	2400	Medium activity
60676	2	86	139.5	236	141	31	25	4.5	9.3	3.5	104	5.773	44.81	268.86	5.6	87	38	2.5	0.5	5.9	281	5.9	0	0.239	2058	2009-2010	97.33333333	60	0	0	0	1	1	1	0	0	1	≥25	1	1	Female	40-59 years	Mexican American	Middle school or lower	Widowed/Divorced/Separated	1	Current	720	Low activity
60735	2	81	97.2	105	79	25	30	4.5	9.6	2.4	122	6.772	9.22	55.32	6.5	0	43	2.2	0.9	3.3	237	1.8	1.8	0.442	2223.5	2009-2010	120	68.66666667	1	0	0	1	0	1	0	0	1	<25	1	0	Male	60 and above years	Non-Hispanic White	College or above	Married or living with a partner	2	Never	480	Low activity
60740	1	76	72	54	18	21	25	4.5	9.4	2.5	80	4.441	2.48	14.88	4.9	90	67	3	0.7	5.3	190	18.3	39.05	0.214	3082	2009-2010	110	58	0	0	0	0	0	0	0	1	0	<25	0	0	Female	20-39 years	Non-Hispanic White	Middle school or lower	Married or living with a partner	3	Current	9600	High activity
60761	1	83	107	161	34	19	27	3.8	8.8	3.4	101	5.607	19.07	114.42	5.9	137	59	3.1	0.7	6.6	259	10.7	0	0.003	1177	2009-2010	145.3333333	84.66666667	0	0	0	1	1	1	0	0	1	≥25	1	1	Female	60 and above years	Non-Hispanic Black	High School	Married or living with a partner	4	Never	800	Low activity
60772	2	79	96.2	99	20	22	29	4.3	9.1	2.5	99	5.495	4.21	25.26	5.6	93	79	0.8	0.3	2.3	208	3.2	0	0.225	1229	2009-2010	118.6666667	68	0	0	0	0	0	0	0	0	0	≥25	0	0	Female	60 and above years	Non-Hispanic White	High School	Married or living with a partner	3	Current	60	Low activity
60844	1	78	89	76	7	19	27	3.5	8.9	3.2	98	5.44	10.08	60.48	5.6	107	96	1.6	0.4	3	233	7	0	0.082	2146	2009-2010	126	85.33333333	0	0	0	0	0	0	0	0	0	≥25	0	0	Female	40-59 years	Non-Hispanic Black	Middle school or lower	Married or living with a partner	4	Never	0	Inactive
60899	1	77	106.3	70	14	18	21	4.2	9.7	2.5	103	5.718	9.17	55.02	5.9	158	80	1.3	0.4	3.2	226	39.2	0	0.1175	1060.5	2009-2010	104	75.33333333	0	0	0	0	0	0	0	0	0	≥25	0	0	Female	60 and above years	Non-Hispanic White	College or above	Married or living with a partner	4	Never	120	Low activity
60906	2	82	80.4	105	19	18	25	4.4	9.8	3.7	110	6.106	7.37	44.22	5.7	191	59	1.5	0.6	4.9	210	8.8	0	0.134	2530.5	2009-2010	131.3333333	74.66666667	0	0	0	0	0	0	0	0	0	<25	0	0	Male	60 and above years	Non-Hispanic White	College or above	Married or living with a partner	4	Never	80	Low activity
60932	1	81	108.2	174	46	33	30	4.1	9.3	3	107	5.94	17.23	103.38	5.5	0	41	1.7	0.3	4.2	304	18.6	0	0.394	1988.5	2009-2010	143.3333333	80.66666667	1	0	0	1	1	1	0	0	1	≥25	1	1	Female	40-59 years	Other Hispanic	Middle school or lower	Married or living with a partner	2	Current	14400	High activity
60934	1	77	108.6	110	19	29	27	4.4	9.3	2.3	111	6.162	10.29	61.74	5.7	124	69	1.7	0.4	2.7	169	0.5	0	0.567	2706	2009-2010	106	72	0	0	0	0	1	1	0	0	0	≥25	0	1	Male	40-59 years	Non-Hispanic White	High School	Married or living with a partner	4	Current	2040	Medium activity
60948	1	82	112.8	79	36	21	21	4.2	9.6	3.1	81	4.496	31.07	186.42	7.9	0	51	1.9	0.5	4.1	245	5.1	0	0.005	2547	2009-2010	107.3333333	69.33333333	1	0	0	1	1	1	0	0	1	≥25	1	1	Male	60 and above years	Non-Hispanic Black	High School	Married or living with a partner	4	Current	7200	High activity
60954	2	75	118	195	19	41	24	4.3	9.9	3.3	91	5.051	35.68	214.08	5.6	93	41	2.5	0.6	3.7	174	4.8	0	0.085	2939	2009-2010	114.6666667	52	0	0	0	1	1	1	0	0	1	≥25	1	0	Male	20-39 years	Non-Hispanic Black	High School	Married or living with a partner	3	Never	0	Inactive
60993	3	86	86.5	81	22	23	24	4.5	9.7	3.2	90	4.996	9.82	58.92	5.2	0	67	2.2	0.2	5	293	4.2	0	0.0735	1696	2009-2010	100.6666667	68	0	0	0	0	0	0	0	0	0	<25	0	0	Female	20-39 years	Non-Hispanic White	High School	Married or living with a partner	4	Never	480	Low activity
61009	2	76	120.4	130	20	36	40	4	9.3	3.2	106	5.884	12.3	73.8	6	146	49	1.4	0.7	3.3	184	11.2	0	0.291	971	2009-2010	138.6666667	68	0	0	1	1	1	1	0	0	1	≥25	1	0	Male	60 and above years	Non-Hispanic White	Middle school or lower	Married or living with a partner	3	Never	0	Inactive
61023	1	86	142	58	10	27	24	3.9	9.5	3.6	119	6.606	22.32	133.92	6.2	138	51	3.1	0.7	8.4	300	11.3	0	0.0655	2149.5	2009-2010	120	77.33333333	0	0	0	1	1	1	0	0	1	≥25	1	0	Female	20-39 years	Non-Hispanic White	High School	Never Married	1	Never	6360	High activity
61033	1	85	120.9	106	24	16	18	4.5	10.3	3.3	157	8.715	40.83	244.98	6.2	0	39	2.3	0.3	2.8	154	12.2	0	0.067	1637.5	2009-2010	147.3333333	76.66666667	1	0	0	1	1	1	0	0	1	≥25	1	1	Female	40-59 years	Non-Hispanic Black	High School	Widowed/Divorced/Separated	2	Never	0	Inactive
61063	2	85	84.6	91	34	22	28	4.2	10.1	4	126	6.994	10.92	65.52	7.6	0	65	2	0.3	3.2	228	4	0	0.003	1297.5	2009-2010	139	47	1	0	0	0	0	0	0	0	0	<25	0	0	Female	60 and above years	Other Race-Including Multi-Racial	High School	Married or living with a partner	1	Never	1200	Low activity
61079	2	87	104	179	14	25	107	4.3	9.4	2.6	107	5.94	18.51	111.06	5.5	0	33	3.6	0.9	8.2	278	7.9	0	0.172	2965	2009-2010	132.6666667	100	0	1	1	1	1	1	0	0	1	≥25	1	1	Male	40-59 years	Mexican American	High School	Married or living with a partner	1	Current	200	Low activity
61090	1	87	75.5	44	18	14	16	4.3	9.5	2.8	88	4.885	5	30	5.2	152	60	1.9	0.3	2.6	369	8.8	0	0.0975	1015	2009-2010	112	70	0	0	0	0	0	0	0	0	0	<25	0	0	Female	20-39 years	Mexican American	Middle school or lower	Married or living with a partner	2	Never	0	Inactive
61091	1	85	77.2	90	20	25	24	4.2	9.3	3.2	96	5.329	4.96	29.76	5	84	94	1.4	0.3	2.9	248	3.2	0	0.265	2332	2009-2010	138	71.33333333	0	0	0	0	0	0	0	0	0	<25	0	0	Female	60 and above years	Other Race-Including Multi-Racial	College or above	Never Married	4	Never	1500	Low activity
61094	1	85	93.1	101	17	35	28	4.6	9.2	3.1	102	5.662	11.78	70.68	5.5	0	40	2.5	0.5	3.2	239	4.8	0	0.001	3071	2009-2010	116.6666667	58.66666667	0	0	0	0	0	0	0	0	0	≥25	0	0	Male	40-59 years	Mexican American	Middle school or lower	Married or living with a partner	2	Never	0	Inactive
61103	2	75	88.5	39	21	20	23	4.5	9.4	2.9	107	5.94	10.52	63.12	4.8	62	85	2.6	0.5	2.7	193	5.1	14.05	0.0645	3450	2009-2010	122.6666667	60	0	0	0	0	0	0	0	0	0	<25	0	0	Male	40-59 years	Mexican American	High School	Married or living with a partner	3	Never	8640	High activity
61106	1	88	106.4	154	22	20	24	4.8	9.6	2.5	98	5.44	16.38	98.28	5.6	127	39	0.9	0.2	3.6	105	6.7	0	0.0075	2151	2009-2010	106	72	0	0	1	1	1	1	0	0	1	≥25	1	1	Male	40-59 years	Mexican American	Middle school or lower	Married or living with a partner	2	Former	960	Low activity
61174	3	86	107.4	66	22	25	26	4.6	9.2	2.2	95	5.273	4.81	28.86	5	0	55	1.9	0.7	10.2	238	7.7	95.3	0.285	3672	2009-2010	122.6666667	72.66666667	0	0	0	0	0	0	0	1	0	≥25	0	0	Male	20-39 years	Non-Hispanic White	High School	Married or living with a partner	1	Current	8400	High activity
61182	2	77	106.4	117	78	29	28	4.2	9.6	3.4	99	5.495	12.1	72.6	5.6	87	48	1.7	0.7	6.1	203	12.5	0	0.0835	1014	2009-2010	119.3333333	75.33333333	0	0	0	1	1	1	0	0	1	≥25	1	1	Female	40-59 years	Other Hispanic	High School	Married or living with a partner	1	Never	3600	High activity
61189	1	87	81	83	19	30	29	4	9.1	3.4	93	5.162	8.13	48.78	5.6	106	51	1.6	0.4	4.7	163	37.6	0	0.155	1707.5	2009-2010	99.33333333	60	0	0	0	0	0	0	0	0	0	<25	0	0	Female	20-39 years	Mexican American	Middle school or lower	Married or living with a partner	1	Never	0	Inactive
61192	2	76	100	56	16	19	23	4.1	9.6	2.4	97	5.384	7.31	43.86	6	0	57	1.8	0.3	3.1	228	4.5	0	0.341	1293	2009-2010	104	59.33333333	1	0	0	0	0	0	0	0	0	≥25	0	1	Female	60 and above years	Non-Hispanic White	College or above	Married or living with a partner	4	Never	80	Low activity
61194	1	76	112.5	138	10	17	24	4.2	9.6	2.7	118	6.55	16.59	99.54	6.1	234	42	2.4	0.7	4.7	293	38.9	0	0	1162.5	2009-2010	120.6666667	50.66666667	1	0	0	1	1	1	0	0	1	≥25	1	1	Female	60 and above years	Non-Hispanic White	Middle school or lower	Widowed/Divorced/Separated	1	Never	0	Inactive
61204	1	77	83.4	78	48	33	39	4	9.9	3.6	128	7.105	3.93	23.58	6.8	230	52	1.2	0.7	2.5	137	87.5	0	0.2615	2389	2009-2010	149.3333333	91.33333333	1	1	1	0	0	0	0	0	0	<25	0	0	Male	60 and above years	Non-Hispanic White	Middle school or lower	Married or living with a partner	2	Current	0	Inactive
61229	2	79	90.2	86	11	24	28	4	9.3	3.2	86	4.774	7.32	43.92	4.9	0	60	1.3	0.3	2.8	276	7.1	0	0.175	2195.5	2009-2010	94.66666667	65.33333333	0	0	0	0	0	0	0	0	0	<25	0	0	Female	40-59 years	Non-Hispanic White	College or above	Married or living with a partner	3	Never	1320	Low activity
61238	2	76	88.5	91	41	25	23	4.3	9.7	3.1	108	5.995	6.66	39.96	5.6	182	76	1.8	0.4	3.5	291	4.5	29.9	0.2015	2918	2009-2010	142.6666667	36.66666667	0	0	0	0	0	0	0	0	0	<25	0	0	Male	40-59 years	Non-Hispanic White	High School	Married or living with a partner	2	Current	6360	High activity
61242	1	79	100.9	467	200	72	50	4.4	9.5	2.8	112	6.217	21.53	129.18	5.8	218	32	2.3	0.6	10	224	17.5	84.2	0.117	1827	2009-2010	126.6666667	92	1	0	0	1	1	1	0	1	0	≥25	1	1	Male	40-59 years	Non-Hispanic White	High School	Widowed/Divorced/Separated	2	Current	960	Low activity
61253	2	85	125	126	27	38	27	4.2	9.3	2.4	120	6.661	28.71	172.26	6.6	220	42	3.1	0.5	3.1	221	4.3	0	0.055	1868	2009-2010	110.6666667	70	1	0	0	1	1	1	0	0	1	≥25	1	0	Male	40-59 years	Mexican American	Middle school or lower	Married or living with a partner	2	Current	0	Inactive
61257	2	76	123.3	132	15	16	19	3.5	9	3.2	84	4.663	15.27	91.62	5.4	141	40	2.6	0.5	6	408	6	0	0.023	1831.5	2009-2010	123.3333333	78	0	0	0	1	1	1	0	0	1	≥25	1	0	Female	40-59 years	Non-Hispanic White	High School	Married or living with a partner	4	Never	520	Low activity
61268	1	87	107.8	122	10	11	15	3.9	9.1	3.3	97	5.384	14.15	84.9	5.3	76	48	3.5	0.5	4.6	248	36.9	0	0.0215	1142	2009-2010	116.6666667	54.66666667	0	0	0	0	1	1	0	0	0	≥25	0	0	Female	20-39 years	Mexican American	High School	Married or living with a partner	2	Former	1680	Low activity
61279	3	86	85.8	54	18	15	19	4.3	9.3	3.5	94	5.218	6.13	36.78	5.3	0	64	2.4	0.4	2.3	244	6.5	39.9	0.001	2124	2009-2010	109.3333333	70.66666667	0	0	0	0	0	0	0	1	0	<25	0	0	Female	20-39 years	Other Hispanic	High School	Never Married	4	Former	3600	High activity
61286	1	83	104.9	69	11	13	18	4.2	9.2	2.4	87	4.829	9.83	58.98	5.2	68	63	2.6	0.4	2.3	239	1.9	0	0.0015	618.5	2009-2010	100.6666667	70	0	0	0	0	1	1	0	0	0	≥25	0	0	Female	20-39 years	Other Race-Including Multi-Racial	High School	Married or living with a partner	2	Never	0	Inactive
61347	1	85	80.3	95	10	12	19	4.5	9.9	2.8	89	4.94	10.92	65.52	4.9	0	85	2.6	0.4	2.4	216	11.6	7.55	0.004	1761	2009-2010	102	66.66666667	0	0	0	0	0	0	0	0	0	<25	0	0	Female	20-39 years	Mexican American	High School	Never Married	4	Never	1520	Low activity
61356	1	81	117.3	115	26	14	24	3.9	8.9	3.1	103	5.718	17.99	107.94	6.1	199	47	1.2	0.4	6.7	264	15.3	0	0.036	948.5	2009-2010	143.3333333	38	0	0	0	1	1	1	0	0	1	≥25	1	1	Female	60 and above years	Non-Hispanic White	High School	Widowed/Divorced/Separated	2	Never	6360	High activity
61359	2	78	105.2	130	9	17	18	3.9	9.5	3	84	4.663	10.76	64.56	5.8	118	46	2.2	0.5	7.5	276	44.1	0	0.258	2989	2009-2010	84	54	0	0	0	0	1	1	0	0	0	≥25	0	0	Female	40-59 years	Non-Hispanic White	High School	Married or living with a partner	1	Current	1680	Low activity
61374	1	86	103.9	92	13	22	24	4.4	9.2	2.7	102	5.662	14.94	89.64	5.3	81	55	2.4	0.4	3	225	2.8	0	0.0455	1314	2009-2010	98.66666667	58	0	0	0	0	1	1	0	0	0	≥25	0	0	Female	20-39 years	Mexican American	Middle school or lower	Never Married	1	Never	0	Inactive
61420	2	84	112	134	72	51	32	4.4	9.5	2.4	103	5.718	13.98	83.88	5.2	108	54	2.4	0.5	2.7	230	7.6	0	0.4345	2557.5	2009-2010	121.3333333	67.33333333	0	0	0	1	1	1	0	0	1	≥25	1	0	Male	20-39 years	Non-Hispanic White	High School	Married or living with a partner	2	Current	2400	Medium activity
61435	1	78	82.5	125	14	39	33	4.2	9.5	2.7	99	5.495	10.49	62.94	5.9	37	39	1.8	0.7	4.8	217	4.7	0	0.1435	2414.5	2009-2010	140.6666667	77.33333333	0	0	0	0	0	0	1	0	0	<25	0	0	Male	40-59 years	Non-Hispanic White	High School	Married or living with a partner	3	Current	26640	High activity
61444	1	83	115.1	89	39	37	27	4.4	9.3	2.9	104	5.773	30.89	185.34	4.9	110	38	2	0.5	2.7	225	11.5	22.3	0.027	1589	2009-2010	129.3333333	64	0	0	0	1	1	1	0	0	1	≥25	1	0	Male	20-39 years	Non-Hispanic White	Middle school or lower	Never Married	1	Never	1120	Low activity
61499	1	81	97.4	116	58	21	27	4.3	8.9	3.2	104	5.773	8.88	53.28	5.5	144	97	2	0.3	3	258	119	29.75	0	1687	2009-2010	130	81.33333333	0	0	0	1	1	1	0	1	0	≥25	1	0	Female	40-59 years	Mexican American	Middle school or lower	Married or living with a partner	3	Current	0	Inactive
61509	1	82	103.5	92	43	36	24	4.2	9.5	3	95	5.273	12.08	72.48	5.4	121	32	2.4	0.2	6.9	274	7.8	14	0.029	3097	2009-2010	111.3333333	53.33333333	0	0	0	0	1	1	0	0	0	≥25	0	0	Male	20-39 years	Non-Hispanic Black	High School	Widowed/Divorced/Separated	4	Current	1440	Low activity
61515	1	84	102.5	68	14	15	21	3.8	9.1	3.2	88	4.885	12.83	76.98	5	82	49	1.6	0.5	4.8	222	11.8	0	0	1534.5	2009-2010	113.3333333	66.66666667	0	0	0	0	1	1	0	0	0	≥25	0	0	Female	20-39 years	Non-Hispanic Black	High School	Never Married	3	Former	5540	High activity
61531	1	75	128	278	67	110	55	4.4	9.1	2.7	184	10.214	69.43	416.58	7.2	0	29	2.4	0.7	5	172	135	0	0.073	2000	2009-2010	134.6666667	73.33333333	1	0	0	1	1	1	0	0	1	≥25	1	1	Male	40-59 years	Mexican American	Middle school or lower	Married or living with a partner	4	Former	0	Inactive
61588	1	83	103	191	22	20	20	4.2	9.8	3.6	102	5.662	19.05	114.3	5.7	205	47	2.8	0.8	6.5	283	2.1	0	0	1603.5	2009-2010	111.3333333	60	1	0	0	1	1	1	0	0	1	≥25	1	1	Female	60 and above years	Non-Hispanic White	High School	Married or living with a partner	1	Never	0	Inactive
61591	2	79	95	90	17	36	33	4.3	9.6	2.4	91	5.051	12.26	73.56	5.6	71	38	1.5	0.5	2.1	205	2.7	0	0.0085	2564.5	2009-2010	112	79.33333333	0	0	0	0	0	0	0	0	0	<25	0	0	Male	40-59 years	Other Race-Including Multi-Racial	College or above	Married or living with a partner	2	Current	5040	High activity
61601	1	77	81.8	45	8	19	24	4.5	9.2	2.1	87	4.829	7.01	42.06	5.1	80	66	1.7	0.2	3	240	2.4	0	0.336	1010	2009-2010	98.66666667	62.66666667	0	0	0	0	0	0	0	0	0	≥25	0	0	Female	20-39 years	Non-Hispanic White	High School	Never Married	3	Current	0	Inactive
61603	2	77	104.5	106	11	25	25	4.5	10.1	2.4	179	9.936	17.96	107.76	6.6	0	41	1.2	0.3	5.1	158	4.6	0	0.271	1518	2009-2010	135.3333333	49.33333333	1	1	0	1	0	1	0	0	1	≥25	1	1	Male	60 and above years	Non-Hispanic White	Middle school or lower	Married or living with a partner	2	Current	0	Inactive
61612	1	78	96	124	12	12	17	4.2	9.5	3	103	5.718	7.41	44.46	5.7	150	55	2.3	0.4	3.1	308	7	0	0.001	1022.5	2009-2010	144	79.33333333	0	0	0	0	0	0	0	0	0	<25	0	0	Female	60 and above years	Other Hispanic	Middle school or lower	Widowed/Divorced/Separated	1	Never	0	Inactive
61639	1	84	84.3	106	35	12	18	4.5	10.1	2.9	94	5.218	9.35	56.1	5.7	71	59	2.4	0.4	2.2	295	11.4	0	0.106	1296	2009-2010	116	59.33333333	0	0	0	0	0	0	0	0	0	<25	0	0	Female	60 and above years	Non-Hispanic Black	College or above	Widowed/Divorced/Separated	1	Current	160	Low activity
61659	1	78	100	43	13	19	21	3.6	9	3.6	92	5.107	12.23	73.38	5.5	104	52	2.3	0.3	1.8	245	10.2	0	0.0845	2153.5	2009-2010	102.6666667	58	0	0	0	0	0	0	0	0	0	≥25	0	0	Female	40-59 years	Non-Hispanic Black	College or above	Married or living with a partner	4	Never	0	Inactive
61663	1	79	79.2	53	13	23	25	4.6	9.4	2.2	100	5.551	4.14	24.84	5.3	122	105	1.8	0.3	3.4	185	0.6	38.2	0.296	3953	2009-2010	118.6666667	74	0	0	0	0	0	0	0	1	0	<25	0	0	Male	40-59 years	Non-Hispanic White	College or above	Married or living with a partner	4	Never	3360	Medium activity
61673	1	77	76.7	86	17	12	13	4.1	9.1	2.4	85	4.718	8.58	51.48	5.3	66	45	2.9	0.6	8.5	212	4	18.6	0.694	3976	2009-2010	109.3333333	76.66666667	0	0	0	0	0	0	0	0	0	<25	0	0	Female	20-39 years	Non-Hispanic White	Middle school or lower	Widowed/Divorced/Separated	1	Current	480	Low activity
61683	2	80	95.5	264	14	17	21	4.3	9.2	3.7	108	5.995	11.76	70.56	5.5	222	36	2.4	0.7	5.7	253	28.5	0	0.6425	2171.5	2009-2010	135.3333333	60	1	0	0	0	0	0	0	0	0	≥25	0	1	Female	60 and above years	Non-Hispanic White	High School	Widowed/Divorced/Separated	1	Current	0	Inactive
61684	2	79	100.1	93	10	16	16	3.8	9.2	2.9	94	5.218	12.18	73.08	5	107	71	1.9	0.4	2.7	283	3	0	0.0505	2035	2009-2010	112	64	0	0	0	0	0	0	0	0	0	≥25	0	0	Female	20-39 years	Non-Hispanic White	College or above	Married or living with a partner	1	Never	5400	High activity
61686	1	76	92.6	108	22	16	21	4.7	10.2	2.9	140	7.771	13.54	81.24	5.6	108	72	2.1	0.5	8.5	284	1018.5	0	0.189	3154	2009-2010	121.3333333	74	1	0	0	1	0	1	0	0	1	<25	1	0	Male	40-59 years	Non-Hispanic White	High School	Married or living with a partner	4	Current	180	Low activity
61716	2	82	104.5	79	40	50	46	4.6	9.3	3.3	108	5.995	10.41	62.46	5.4	129	70	0.8	0.4	6.1	286	119	105.3	0.018	1667	2009-2010	126.6666667	82	0	0	0	1	1	1	0	1	0	≥25	1	0	Male	60 and above years	Other Hispanic	Middle school or lower	Married or living with a partner	4	Current	10560	High activity
61717	1	77	127	347	17	23	21	3.6	8.9	2.8	98	5.44	39.46	236.76	5.7	116	35	2.6	0.5	8.5	279	5.7	14	0.223	1967.5	2009-2010	145.3333333	74.66666667	0	0	0	1	1	1	0	0	1	≥25	1	1	Male	60 and above years	Non-Hispanic White	College or above	Married or living with a partner	4	Current	4800	High activity
61729	2	79	88.8	57	13	13	19	4.4	9.3	2.4	92	5.107	15.71	94.26	5	123	51	1.4	0.4	4.1	260	7.3	0	0.04	1776	2009-2010	115.3333333	68.66666667	0	0	0	0	0	0	0	0	0	≥25	0	0	Female	20-39 years	Non-Hispanic White	College or above	Never Married	3	Never	1320	Low activity
61730	2	85	76.7	77	11	24	35	4.4	9.5	2.8	82	4.552	4.84	29.04	5.3	78	85	1.8	0.6	3.4	209	1.9	0	0.0835	1751	2009-2010	102	71.33333333	0	0	0	0	0	0	0	0	0	<25	0	0	Female	40-59 years	Non-Hispanic White	High School	Married or living with a partner	4	Never	4320	High activity
61731	1	75	94.7	90	24	18	21	4.7	9.8	2.9	87	4.829	7.46	44.76	4.6	86	42	2.1	0.6	3.1	319	3.5	11.15	0.292	2352	2009-2010	110	66	0	0	0	0	0	0	0	0	0	≥25	0	0	Male	20-39 years	Other Hispanic	High School	Widowed/Divorced/Separated	3	Never	0	Inactive
61772	2	77	74.4	52	10	20	23	3.9	9.9	2.8	102	5.662	6.93	41.58	5.6	117	69	2.1	0.6	2.2	307	8	0	0.065	1116	2009-2010	129.3333333	79.33333333	0	0	0	0	0	0	0	0	0	<25	0	0	Female	60 and above years	Other Hispanic	High School	Married or living with a partner	3	Current	2500	Medium activity
61778	2	87	99	49	16	37	66	4.4	10	3	98	5.44	16.46	98.76	5.6	113	69	1.2	0.4	2.3	287	28.7	0	0.006	1233.5	2009-2010	119.3333333	83.33333333	0	0	0	0	0	0	0	0	0	≥25	0	0	Female	40-59 years	Non-Hispanic Black	College or above	Never Married	3	Never	0	Inactive
61809	1	82	104	109	12	16	24	4.5	9.6	2.9	116	6.439	8.27	49.62	6	244	55	1.9	0.7	3.2	139	7.6	0	0.176	1798	2009-2010	107.3333333	60.66666667	1	1	1	0	0	0	0	0	0	≥25	0	1	Male	60 and above years	Other Hispanic	High School	Married or living with a partner	1	Never	1260	Low activity
61839	1	84	112.4	96	15	14	17	4.4	9.8	3.6	104	5.773	6.37	38.22	4.8	0	37	1.8	0.2	4.7	186	19.1	0	0.002	3546.5	2009-2010	138	88	0	0	0	0	1	1	0	0	0	≥25	0	1	Male	60 and above years	Non-Hispanic Black	Middle school or lower	Married or living with a partner	2	Current	0	Inactive
61853	2	77	63.2	47	8	12	22	4.3	9.9	2.8	93	5.162	3.07	18.42	5.3	119	65	2.4	0.3	3.7	269	9.6	0	0.8495	2198.5	2009-2010	102.6666667	65.33333333	0	0	0	0	0	0	0	0	0	<25	0	0	Female	40-59 years	Non-Hispanic White	High School	Never Married	4	Current	880	Low activity
61866	2	77	105.1	160	12	12	19	3.9	9.9	3.2	105	5.829	11.04	66.24	5.6	147	50	2.4	0.5	3.7	201	10.4	0	0.0685	1266	2009-2010	109.3333333	50	0	0	0	0	1	1	0	0	0	≥25	0	1	Female	60 and above years	Non-Hispanic White	High School	Married or living with a partner	3	Never	0	Inactive
61873	2	86	108.1	85	28	68	49	4.3	9.3	3.3	149	8.271	36.46	218.76	6.6	0	54	1.8	0.4	4.3	332	53.5	0	0.004	1108.5	2009-2010	112.6666667	68.66666667	1	0	0	1	1	1	0	0	1	≥25	1	1	Female	40-59 years	Mexican American	High School	Widowed/Divorced/Separated	1	Current	144	Low activity
61875	2	75	104.6	118	42	21	25	4.2	9.4	2.5	107	5.94	14.27	85.62	5.3	158	45	1.3	0.4	2.5	162	2	0	0.3915	1912.5	2009-2010	122.6666667	75.33333333	0	0	0	1	1	1	0	0	1	≥25	1	0	Male	40-59 years	Non-Hispanic White	Middle school or lower	Never Married	2	Current	5280	High activity
61904	2	75	109	183	17	31	31	4.4	9.2	3.1	155	8.604	3.77	22.62	8.3	0	37	2.1	0.4	3.3	278	6.1	21.05	0.139	1600	2009-2010	136.6666667	90.66666667	1	0	0	0	1	1	0	0	0	≥25	0	1	Male	60 and above years	Non-Hispanic Black	High School	Married or living with a partner	2	Current	1000	Low activity
61905	2	80	121.7	92	24	17	21	4.1	9.4	3.1	99	5.495	16.49	98.94	5.3	115	76	0.8	0.5	4.8	460	4.5	0	0.0015	1971	2009-2010	132	64.66666667	0	0	0	1	1	1	0	0	1	≥25	1	0	Female	60 and above years	Non-Hispanic White	High School	Never Married	2	Never	480	Low activity
61909	1	76	102.2	73	19	28	20	4.1	9.6	2.5	116	6.439	13.02	78.12	5.5	53	47	2.2	0.6	7	335	2.9	0	1.422	4109	2009-2010	122.6666667	56.66666667	0	0	0	0	0	0	0	0	0	≥25	0	0	Male	20-39 years	Non-Hispanic White	High School	Married or living with a partner	2	Current	3600	High activity
61924	1	78	104.9	98	21	20	21	4.1	9.3	4	105	5.829	13.99	83.94	6.4	114	38	2.1	0.6	1.9	216	8.8	0	0.0735	1234.5	2009-2010	121.3333333	76.66666667	0	0	0	0	1	1	0	0	0	≥25	0	0	Male	40-59 years	Non-Hispanic Black	High School	Never Married	1	Never	2160	Medium activity
61943	1	80	117.4	140	35	34	27	3.9	9.3	2.2	99	5.495	28.09	168.54	5.9	154	30	1.6	0.5	2.9	182	16.7	0	0.0605	2743.5	2009-2010	102	63.33333333	0	0	0	1	1	1	0	0	1	≥25	1	1	Male	60 and above years	Non-Hispanic White	Middle school or lower	Married or living with a partner	4	Never	0	Inactive
61971	1	81	76.3	44	12	29	64	4.7	9.5	2.8	97	5.384	12.68	76.08	5	87	82	1.4	0.4	1.7	213	10.4	0	0.0045	2775	2009-2010	116.6666667	77.33333333	0	0	0	0	0	0	0	0	0	<25	0	0	Female	20-39 years	Non-Hispanic White	High School	Never Married	3	Never	1380	Low activity
61989	1	82	99.8	76	31	55	37	4.2	9.5	2.4	88	4.885	5.19	31.14	5.3	74	66	1.2	0.4	2.3	116	4.6	0	0.301	3920	2009-2010	114.6666667	74.66666667	0	0	0	0	0	0	0	0	0	≥25	0	0	Male	40-59 years	Non-Hispanic White	High School	Married or living with a partner	3	Never	19200	High activity
62027	1	80	87.5	73	11	14	20	3.9	9.3	2.2	105	5.829	6.01	36.06	5.3	124	53	1.4	0.5	5.5	171	9.5	0	0.195	1898	2009-2010	112.6666667	67.33333333	0	0	0	0	0	0	0	0	0	<25	0	0	Male	60 and above years	Non-Hispanic White	Middle school or lower	Married or living with a partner	2	Current	5040	High activity
62036	2	88	99.3	59	22	26	30	4.6	9.6	3.1	104	5.773	10.77	64.62	5.7	122	62	2.1	0.7	3	235	5	21.8	0.061	2973	2009-2010	127.3333333	79.33333333	0	0	0	0	0	0	0	0	0	<25	0	0	Male	60 and above years	Non-Hispanic White	College or above	Married or living with a partner	4	Never	300	Low activity
62065	2	87	99.3	100	29	41	37	3.7	8.7	3.4	97	5.384	12.14	72.84	6.1	192	55	2.8	0.5	2.5	286	12.6	0.05	0.0015	1676	2009-2010	118	79.33333333	0	0	0	1	1	1	0	0	1	≥25	1	0	Female	40-59 years	Mexican American	Middle school or lower	Married or living with a partner	1	Never	1920	Medium activity
62103	2	89	75	69	8	18	22	4.5	9.4	2	91	5.051	3.53	21.18	5	75	67	1.9	0.3	2.1	193	1.3	0	0.0425	1134	2009-2010	94.66666667	61.33333333	0	0	0	0	0	0	0	0	0	<25	0	0	Female	40-59 years	Other Hispanic	College or above	Widowed/Divorced/Separated	4	Never	700	Low activity
62112	2	77	84.7	194	21	44	33	4.4	9.2	2.7	132	7.327	30.34	182.04	6.3	0	45	1.9	0.4	3	220	7.3	0	0.187	1093	2009-2010	142.6666667	78.66666667	1	0	0	1	0	1	0	0	1	<25	1	1	Female	40-59 years	Other Hispanic	High School	Married or living with a partner	1	Never	1000	Low activity
62143	2	78	71.5	46	29	13	18	4.3	8.9	3	86	4.774	5.08	30.48	5	71	72	1.1	0.4	4.7	129	7.1	0	0.1855	1298	2009-2010	102	60.66666667	0	0	0	0	0	0	0	0	0	<25	0	0	Female	40-59 years	Non-Hispanic White	College or above	Married or living with a partner	3	Current	2120	Medium activity
62146	2	79	105.4	2693	1116	218	265	3.8	10	NA	100	5.551	6.89	41.34	5.6	148	24	NA	NA	NA	214	32.4	39.85	0.071	1563.5	2009-2010	139.3333333	95.33333333	0	0	1	1	1	1	0	1	0	≥25	1	1	Male	40-59 years	Non-Hispanic White	High School	Married or living with a partner	2	Former	720	Low activity
62155	1	89	112.3	67	31	37	29	4.1	9.1	3.1	114	6.328	12.35	74.1	5.4	128	38	2.5	0.6	5.2	301	5.6	0	0.105	1455	2009-2010	113	84	0	0	0	1	1	1	0	0	1	≥25	1	1	Male	20-39 years	Mexican American	High School	Married or living with a partner	1	Never	5760	High activity
62209	2	96	92.9	582	103	19	27	4.6	9.3	2.4	138	7.66	29.72	178.32	5.7	77	31	1.3	0.3	2.9	207	0.21	0	0.006	2504.5	2011-2012	110.6666667	58	1	0	0	1	1	1	0	0	1	≥25	1	1	Female	60 and above years	Mexican American	Middle school or lower	Widowed/Divorced/Separated	2	Never	720	Low activity
62214	2	95	89	39	14	12	17	4.2	9.4	3.5	90	4.996	3.64	21.84	5.2	99	54	2.4	0.6	6.1	330	13.5	0	0.027	1556.5	2011-2012	109.3333333	55.33333333	0	0	0	0	0	0	0	0	0	<25	0	0	Female	20-39 years	Non-Hispanic Black	High School	Widowed/Divorced/Separated	2	Never	0	Inactive
62217	2	98	118.6	104	10	22	27	3.8	9.3	3.1	178	9.881	14.04	84.24	7	0	46	1.1	0.5	6.6	273	253	0	0.0135	566.5	2011-2012	132.6666667	56	1	0	0	1	1	1	0	0	1	≥25	1	1	Female	60 and above years	Mexican American	Middle school or lower	Never Married	1	Never	1400	Low activity
62226	2	93	97.2	108	13	18	20	4.1	8.9	2.5	111	6.162	10.95	65.7	5.6	113	37	1.3	0.9	5.1	170	10	0	0.028	1209	2011-2012	124.6666667	66.66666667	0	1	0	0	0	0	0	0	0	≥25	0	1	Male	60 and above years	Other Hispanic	High School	Married or living with a partner	3	Never	6720	High activity
62231	2	102	111	117	22	49	35	4	9.3	2.8	99	5.495	12.47	74.82	5.8	178	59	2.2	0.5	6	328	3	0	0.283	1667	2011-2012	116	69.33333333	0	0	0	1	1	1	0	0	1	≥25	1	0	Female	40-59 years	Mexican American	High School	Married or living with a partner	3	Never	0	Inactive
62248	1	93	104.2	331	17	15	25	4.7	8.8	3.9	106	5.884	19.85	119.1	6.1	205	30	2.1	0.6	2.4	165	15.1	0	NA	0	2011-2012	131.3333333	69.33333333	1	1	0	1	1	1	0	0	1	≥25	1	1	Male	60 and above years	Other Race-Including Multi-Racial	Middle school or lower	Married or living with a partner	2	Current	240	Low activity
62309	3	92	100.3	93	37	28	28	4.6	10.2	3.5	223	12.379	11.88	71.28	11.2	0	51	2.9	0.4	3.1	280	90	0	0	720	2011-2012	120	84	1	0	0	1	1	1	0	0	1	≥25	1	0	Female	40-59 years	Mexican American	Middle school or lower	Widowed/Divorced/Separated	1	Never	320	Low activity
62317	1	94	107	149	32	15	36	4	9.4	3	98	5.44	5.3	31.8	7.7	0	59	1.9	0.4	2.6	241	21.6	0	0.332	2178	2011-2012	118	77.33333333	1	0	0	0	1	1	0	0	0	≥25	0	1	Male	40-59 years	Non-Hispanic White	College or above	Married or living with a partner	1	Current	5760	High activity
62332	1	100	110.7	179	18	37	31	4.6	10	2.8	112	6.217	28.5	171	5.4	126	43	2.3	0.6	5.7	293	6.8	0	0.103	1615	2011-2012	134	67.33333333	0	0	0	1	1	1	0	0	1	≥25	1	1	Male	20-39 years	Non-Hispanic White	High School	Married or living with a partner	1	Never	1560	Low activity
62367	3	90	94.2	195	78	30	22	4.3	9.3	3.4	107	5.94	30.32	181.92	5.6	123	41	1.9	0.3	5.7	319	8.5	0	NA	0	2011-2012	117	78	0	0	0	1	1	1	0	0	1	≥25	1	0	Male	40-59 years	Other Race-Including Multi-Racial	Middle school or lower	Married or living with a partner	3	Never	0	Inactive
62384	1	101	108.2	350	146	21	31	4.1	8.8	2.4	103	5.718	27.3	163.8	5	110	44	2.4	0.4	3.5	260	8	0	0.176	3649	2011-2012	121.3333333	80	0	0	0	1	1	1	0	0	1	≥25	1	0	Male	40-59 years	Non-Hispanic White	High School	Widowed/Divorced/Separated	3	Never	6120	High activity
62386	1	97	119.7	147	38	28	23	4.3	9.3	2.4	112	6.217	10.09	60.54	5.5	139	47	3.2	0.3	9.5	287	16.7	0	0.2815	3381.5	2011-2012	113.3333333	77.33333333	0	0	0	1	1	1	0	0	1	≥25	1	1	Male	20-39 years	Other Race-Including Multi-Racial	High School	Married or living with a partner	3	Current	2880	Medium activity
62409	1	94	115	103	18	14	29	4	9	2.6	73	4.052	10.05	60.3	5.4	0	72	0.8	0.7	5.6	187	45	0	0.2735	1188.5	2011-2012	186	55	0	1	1	0	1	1	0	0	0	≥25	0	0	Female	60 and above years	Non-Hispanic White	High School	Widowed/Divorced/Separated	2	Current	0	Inactive
62421	3	91	82.4	89	27	33	26	4.3	9.2	2.9	94	5.218	7.63	45.78	5.1	76	61	1.7	0.5	3.7	205	1.2	0	0	2676.5	2011-2012	106	62.66666667	0	0	0	0	0	0	0	0	0	<25	0	0	Male	20-39 years	Other Race-Including Multi-Racial	College or above	Never Married	1	Never	1480	Low activity
62475	2	97	85.1	60	11	17	23	4.7	10	2.8	84	4.663	7.16	42.96	5.5	80	51	2.5	0.6	3.5	211	11.8	0	0.038	2385	2011-2012	107.3333333	63.33333333	0	0	0	0	0	0	0	0	0	≥25	0	0	Male	20-39 years	Non-Hispanic White	High School	Married or living with a partner	1	Never	27840	High activity
62491	2	102	94.7	167	60	27	21	4.6	9.2	2.6	109	6.051	16.77	100.62	5.9	228	47	2	0.3	2.6	280	30.4	0	NA	0	2011-2012	120	71.33333333	1	0	0	1	1	1	0	0	1	≥25	1	1	Female	60 and above years	Other Race-Including Multi-Racial	High School	Married or living with a partner	4	Never	800	Low activity
62504	1	100	111.5	129	12	13	18	4.3	9.3	3.3	92	5.107	37.25	223.5	5.3	103	43	1.6	0.4	4	246	0.8	0	0.024	1427.5	2011-2012	113.3333333	71.33333333	0	0	0	1	1	1	0	0	1	≥25	1	0	Female	20-39 years	Other Hispanic	Middle school or lower	Married or living with a partner	1	Never	5760	High activity
62510	1	92	99.9	164	20	20	22	4.2	9.7	3.1	108	5.995	17.13	102.78	6.1	145	53	1.8	0.4	5	357	12.6	0	0.069	1145	2011-2012	165.3333333	84.66666667	0	0	0	1	1	1	0	0	1	≥25	1	0	Female	60 and above years	Non-Hispanic White	High School	Married or living with a partner	3	Current	1440	Low activity
62522	2	94	105.4	102	544	113	95	4.4	9.8	3.1	124	6.883	10.8	64.8	5.6	227	93	2.1	0.6	4.6	138	7.5	186	0.182	2567.5	2011-2012	139.3333333	70	1	0	1	1	1	1	0	1	0	≥25	1	1	Male	40-59 years	Non-Hispanic White	High School	Widowed/Divorced/Separated	4	Current	11760	High activity
62524	1	93	82.3	75	23	21	19	5	9.7	2.7	89	4.94	6.65	39.9	4.9	58	39	1.4	0.4	2.2	181	16.1	7	0.026	3640.5	2011-2012	110.6666667	55.33333333	0	0	0	0	0	0	0	0	0	<25	0	0	Male	20-39 years	Non-Hispanic White	College or above	Never Married	3	Never	8880	High activity
62587	1	101	98.9	68	18	10	24	3.9	9.1	3.1	126	6.994	7.43	44.58	5.8	91	61	2	0.6	3.7	212	4.8	0	0.5345	2272	2011-2012	131.3333333	74	1	1	0	0	0	0	0	0	0	<25	0	0	Male	60 and above years	Non-Hispanic White	High School	Married or living with a partner	1	Current	14160	High activity
62602	1	95	92.2	117	7	17	23	3.4	9.2	3.7	95	5.273	4.74	28.44	5.6	188	71	1.9	0.5	4.6	220	4.5	0	0.202	2516.5	2011-2012	138	62.66666667	0	0	0	0	0	0	0	0	0	≥25	0	0	Female	60 and above years	Non-Hispanic White	High School	Widowed/Divorced/Separated	4	Never	960	Low activity
62616	3	91	75.5	39	11	15	24	4.5	9.3	4	113	6.273	13.71	82.26	5	114	55	1.9	0.5	5.2	250	37.2	0	0.023	1637	2011-2012	106	75.33333333	0	0	0	0	0	0	0	0	0	<25	0	0	Female	20-39 years	Other Race-Including Multi-Racial	Middle school or lower	Married or living with a partner	1	Never	0	Inactive
62635	3	91	90.1	286	29	29	32	4.4	9.1	3.5	118	6.55	18.1	108.6	7.2	279	44	2.4	0.4	2.8	256	6.6	0	0.0095	1688.5	2011-2012	100	68	1	0	0	1	1	1	0	0	1	≥25	1	1	Female	20-39 years	Other Race-Including Multi-Racial	College or above	Married or living with a partner	1	Never	1440	Low activity
62661	2	96	87.8	312	43	21	22	4.6	9.6	3.3	93	5.162	7.23	43.38	5.3	100	45	4.8	0.6	6.6	279	10.8	21.8	0.173	2259	2011-2012	109.3333333	76	0	0	0	0	0	0	0	0	0	<25	0	0	Male	20-39 years	Non-Hispanic White	High School	Never Married	3	Current	6360	High activity
62691	2	100	80.5	69	21	20	19	4.5	9.5	3	90	4.996	1.07	6.42	5.2	68	63	2.5	0.4	2.2	269	12.8	67	0.017	2197	2011-2012	110	62.66666667	0	0	0	0	0	0	0	1	0	<25	0	0	Male	20-39 years	Non-Hispanic Black	Middle school or lower	Never Married	2	Current	20160	High activity
62708	3	91	81.4	108	34	20	18	4.4	9.6	2.8	107	5.94	10.18	61.08	5.7	73	47	1.6	0.3	2.4	161	13.8	0.2	0.0795	2484	2011-2012	159.3333333	82	0	0	0	0	0	0	0	0	0	<25	0	0	Male	40-59 years	Other Race-Including Multi-Racial	High School	Married or living with a partner	2	Current	480	Low activity
62727	1	95	97.5	129	16	17	21	4	9.6	3.1	132	7.327	8.29	49.74	5.9	0	65	1.5	0.5	3.7	144	1708	0	0.002	1104.5	2011-2012	217	64	1	1	1	0	0	0	0	0	0	≥25	0	1	Female	60 and above years	Non-Hispanic White	High School	Married or living with a partner	2	Current	2880	Medium activity
62735	1	97	84.5	68	12	21	20	4.6	9.3	2.5	88	4.885	6.27	37.62	5	105	44	1.8	0.5	3.3	216	12.1	0	0.0755	1142	2011-2012	102.6666667	74	0	0	0	0	0	0	0	0	0	<25	0	0	Male	20-39 years	Non-Hispanic White	High School	Married or living with a partner	4	Never	0	Inactive
62736	2	90	87.5	65	24	17	21	4	8.8	2.9	97	5.384	11.42	68.52	6.3	145	68	0.9	0.3	2	215	14.2	0	0.169	1814	2011-2012	128	72	0	0	0	0	0	0	1	0	0	<25	0	0	Female	40-59 years	Non-Hispanic Black	High School	Never Married	2	Never	6480	High activity
62744	2	91	114.8	75	34	33	32	4.6	9.4	2.7	87	4.829	25.73	154.38	4.8	94	44	2	0.5	2.1	244	20.2	0	0	2138.5	2011-2012	124	88	0	0	0	1	1	1	0	0	1	≥25	1	0	Male	20-39 years	Other Hispanic	College or above	Married or living with a partner	3	Never	4080	High activity
62789	2	101	96.2	110	19	21	19	4.8	9.4	2.5	99	5.495	18.55	111.3	5.4	153	49	2.1	0.3	4.9	249	4.2	0	0.019	863.5	2011-2012	106.6666667	78	0	0	0	0	1	1	0	0	0	≥25	0	0	Female	20-39 years	Other Race-Including Multi-Racial	High School	Married or living with a partner	3	Never	1560	Low activity
62838	2	99	80.2	53	14	48	46	4.1	9.2	3.5	86	4.774	3.45	20.7	4.9	66	71	1.6	0.3	1.5	125	7.1	0	0.0355	998.5	2011-2012	94.66666667	68	0	0	0	0	0	0	1	0	0	<25	0	0	Female	40-59 years	Non-Hispanic Black	High School	Never Married	2	Current	840	Low activity
62849	1	96	163.5	65	22	17	16	3.5	8.7	2.7	107	5.94	23.95	143.7	5.8	152	49	1.7	0.5	6	182	32.9	0	0.0565	2331.5	2011-2012	120	74.66666667	0	1	0	1	1	1	0	0	1	≥25	1	1	Female	40-59 years	Non-Hispanic Black	High School	Married or living with a partner	4	Never	960	Low activity
62859	2	95	120.1	59	16	33	33	4.1	9.9	3.4	99	5.495	14.95	89.7	5.9	146	57	2.2	0.5	6	304	52	0	0.2405	2485.5	2011-2012	122	80.66666667	0	0	0	0	1	1	0	0	0	≥25	0	0	Female	40-59 years	Non-Hispanic Black	High School	Widowed/Divorced/Separated	2	Current	120	Low activity
62864	1	94	103	356	131	49	39	4.1	9.5	3.4	104	5.773	19.88	119.28	6.9	212	48	1.7	0.6	4.4	235	3.9	0	0.051	1091	2011-2012	129.3333333	80	1	0	0	1	1	1	0	0	1	≥25	1	1	Female	40-59 years	Non-Hispanic White	High School	Never Married	1	Current	1200	Low activity
62881	1	93	93.9	92	27	23	25	4.3	9.6	2.8	107	5.94	6.96	41.76	5.1	127	75	1.1	0.4	3.4	200	13.6	18.85	0.246	2364.5	2011-2012	130.6666667	74.66666667	0	0	0	0	0	0	0	0	0	≥25	0	0	Female	40-59 years	Non-Hispanic White	College or above	Married or living with a partner	4	Current	1680	Low activity
62928	2	90	119.4	128	45	14	19	3.6	9.4	3.6	251	13.933	33.53	201.18	10.5	0	46	1.7	0.3	2.7	280	30.8	0	0.0725	1855	2011-2012	115.3333333	62.66666667	1	0	0	1	1	1	0	0	1	≥25	1	1	Female	40-59 years	Non-Hispanic Black	Middle school or lower	Never Married	1	Current	6240	High activity
62936	1	95	82	46	15	13	21	5.1	9.7	2.8	81	4.496	2.34	14.04	5.3	103	70	1.3	0.5	4.5	191	0.3	16.75	0.4	2977.5	2011-2012	114	34	0	0	0	0	0	0	0	0	0	<25	0	0	Female	20-39 years	Non-Hispanic White	High School	Married or living with a partner	1	Current	1440	Low activity
62941	2	90	76.1	49	44	21	33	4.3	9.7	4	83	4.607	3.15	18.9	5.2	111	119	1.9	0.6	3.3	361	64.6	18.7	0.1635	1500.5	2011-2012	148.6666667	95.33333333	0	0	0	0	0	0	0	0	0	<25	0	0	Female	40-59 years	Non-Hispanic Black	High School	Widowed/Divorced/Separated	2	Former	0	Inactive
62955	2	99	76.9	56	35	21	21	4.3	9.5	2.6	92	5.107	3.68	22.08	5.2	75	77	1.4	0.3	2.3	204	8.5	0	0.045	2393.5	2011-2012	96.66666667	65.33333333	0	0	0	0	0	0	0	0	0	<25	0	0	Female	20-39 years	Non-Hispanic White	College or above	Married or living with a partner	4	Never	2880	Medium activity
63002	2	93	106.6	271	50	26	18	4.8	10	2.6	237	13.156	14.72	88.32	12.2	0	62	1.9	0.8	9.3	234	8.7	0	0.048	1503.5	2011-2012	111.3333333	76.66666667	1	0	0	1	1	1	0	0	1	≥25	1	1	Female	40-59 years	Other Hispanic	High School	Married or living with a partner	3	Never	240	Low activity
63012	1	91	102.3	97	14	17	34	3.9	9	2.9	108	5.995	11.26	67.56	5.1	165	51	0.7	0.3	2.6	180	1.6	25.55	0.4195	2655	2011-2012	130.6666667	75.33333333	0	0	1	0	0	0	0	0	0	≥25	0	0	Male	60 and above years	Non-Hispanic White	College or above	Married or living with a partner	4	Current	4800	High activity
63022	1	92	101.4	89	48	67	37	5.1	9.6	2.2	107	5.94	14.51	87.06	5.9	143	52	1.9	0.3	3.5	291	20.8	0	0.384	936	2011-2012	123.3333333	76	0	0	0	1	1	1	0	0	1	≥25	1	0	Male	40-59 years	Non-Hispanic White	Middle school or lower	Married or living with a partner	3	Current	0	Inactive
63041	2	103	91.8	89	22	41	34	4.6	9.4	2.5	90	4.996	9.58	57.48	5.5	145	65	2.3	0.5	3	290	9.8	0	NA	0	2011-2012	118	78.66666667	0	0	0	0	0	0	0	0	0	≥25	0	0	Male	20-39 years	Other Race-Including Multi-Racial	College or above	Never Married	4	Never	2760	Medium activity
63057	1	98	84.2	54	8	17	22	4.1	9.3	4	85	4.718	4.39	26.34	5.3	82	43	1.1	0.5	2.9	236	8.4	0	0.2075	2786.5	2011-2012	106	76	0	0	0	0	0	0	0	0	0	<25	0	0	Male	20-39 years	Non-Hispanic White	High School	Never Married	3	Never	8160	High activity
63082	1	101	83	81	21	20	24	4	9.4	2.2	91	5.051	3.21	19.26	5.9	80	53	1.5	0.6	5.5	194	2.3	0	0.169	1982	2011-2012	116.6666667	66.66666667	0	0	0	0	0	0	0	0	0	<25	0	0	Female	60 and above years	Non-Hispanic White	Middle school or lower	Married or living with a partner	1	Former	840	Low activity
63091	2	93	121.8	148	28	25	19	4.2	9.2	2.8	97	5.384	15.8	94.8	5	0	61	2.1	0.7	4.4	232	9.3	51.6	0.138	2334	2011-2012	112.6666667	76	0	0	0	1	1	1	0	1	0	≥25	1	0	Male	60 and above years	Non-Hispanic White	College or above	Married or living with a partner	4	Current	0	Inactive
63094	1	94	110.8	98	15	19	19	4.7	9.6	2.3	149	8.271	7.65	45.9	7.2	0	54	1.3	0.7	5.3	189	10.3	0	0.248	1878.5	2011-2012	143.3333333	65.33333333	1	0	0	0	1	1	0	0	0	≥25	0	1	Male	60 and above years	Non-Hispanic White	High School	Married or living with a partner	3	Never	0	Inactive
63097	1	95	94.3	211	12	11	20	4.1	9.6	3.3	107	5.94	11.86	71.16	6.1	101	38	2.6	0.6	7.7	268	9.8	0	0.142	1617	2011-2012	126.6666667	17.33333333	0	0	0	0	0	0	0	0	0	<25	0	0	Male	60 and above years	Non-Hispanic White	High School	Married or living with a partner	3	Current	6420	High activity
63106	1	95	95.4	90	18	20	19	4.5	9.3	2.2	95	5.273	10.2	61.2	5.3	71	50	1.8	0.5	3.1	186	8.7	0	0.195	1361.5	2011-2012	124	86.66666667	0	0	0	0	0	0	0	0	0	≥25	0	0	Male	40-59 years	Non-Hispanic White	Middle school or lower	Widowed/Divorced/Separated	1	Current	480	Low activity
63109	1	101	113.2	352	13	13	14	3.9	9.7	2.9	96	5.329	22.4	134.4	5.7	99	54	2.7	0.6	5.1	324	1.8	0	0.0325	1491.5	2011-2012	126	82	0	0	0	1	1	1	0	0	1	≥25	1	0	Female	40-59 years	Non-Hispanic White	Middle school or lower	Married or living with a partner	3	Current	480	Low activity
63112	1	95	92.8	80	30	24	38	4.3	9.2	4.5	107	5.94	8.76	52.56	5.9	0	45	0.7	0.4	2.3	149	2.9	0	0.034	1181.5	2011-2012	114	65.33333333	0	0	1	0	0	0	0	0	0	<25	0	0	Female	60 and above years	Other Race-Including Multi-Racial	Middle school or lower	Married or living with a partner	2	Never	0	Inactive
63125	1	93	88.8	166	7	18	17	4.4	10.2	2.8	102	5.662	8.86	53.16	5.4	88	49	1.6	0.3	3.7	324	3.9	0	0.138	1486	2011-2012	110	64	0	0	0	0	0	0	0	0	0	≥25	0	1	Female	40-59 years	Non-Hispanic Black	High School	Married or living with a partner	2	Never	480	Low activity
63126	1	90	99.1	198	19	24	22	4.8	9.3	2.2	93	5.162	7.17	43.02	4.7	103	49	1.6	0.4	4	158	11	0	0.0365	1093	2011-2012	120.6666667	84	0	0	0	0	0	0	0	0	0	≥25	0	0	Male	40-59 years	Non-Hispanic White	College or above	Married or living with a partner	4	Never	4800	High activity
63133	2	94	98.4	83	23	24	21	4.6	9.3	2.5	100	5.551	22.15	132.9	5.6	74	41	2.1	0.3	2.2	233	30	0	0.0405	2349.5	2011-2012	102	56.66666667	0	0	0	1	0	1	0	0	1	≥25	1	0	Male	20-39 years	Mexican American	Middle school or lower	Married or living with a partner	3	Never	10960	High activity
63142	2	93	97.3	83	17	27	24	3.9	8.8	3.1	96	5.329	6.7	40.2	4.9	91	42	0.8	0.4	2.4	211	9.5	0	0.0475	2402	2011-2012	171	78	0	0	0	0	0	0	0	0	0	≥25	0	0	Male	40-59 years	Non-Hispanic Black	College or above	Married or living with a partner	3	Never	8640	High activity
63145	3	90	75.5	90	19	16	25	4	9.3	2.5	127	7.05	1.8	10.8	6.2	0	80	1.9	0.6	4.3	216	4400	0	NA	0	2011-2012	134.6666667	82.66666667	1	0	0	0	0	0	0	0	0	<25	0	0	Male	40-59 years	Non-Hispanic Black	High School	Widowed/Divorced/Separated	1	Current	6272	High activity
63159	2	102	127.1	163	30	30	26	4	9.2	2.8	96	5.329	19.1	114.6	5.6	108	37	2	0.8	3.1	289	15.2	0	0.348	2236	2011-2012	122.6666667	76	0	0	0	1	1	1	0	0	1	≥25	1	1	Male	40-59 years	Non-Hispanic White	High School	Married or living with a partner	2	Current	4800	High activity
63172	1	102	93	105	11	16	19	4.6	9.5	3.1	102	5.662	11.98	71.88	6	0	65	1.7	0.3	3.9	350	5.7	0	5.00E-04	1803	2011-2012	117.3333333	66	1	0	0	0	0	0	0	0	0	<25	0	0	Female	60 and above years	Mexican American	Middle school or lower	Widowed/Divorced/Separated	2	Current	540	Low activity
63183	1	96	103.2	93	41	21	16	4.2	9.4	3	113	6.273	6.8	40.8	5.8	154	55	1.5	0.3	4.1	211	9.7	0	0	352.5	2011-2012	111.3333333	68	0	0	0	0	1	1	0	0	0	≥25	0	0	Female	40-59 years	Non-Hispanic Black	Middle school or lower	Never Married	2	Former	0	Inactive
63188	1	100	136.2	107	62	32	26	4.2	9.5	3	130	7.216	17.13	102.78	6	0	52	1.7	0.7	4.9	193	435	16.35	0.0355	1423.5	2011-2012	115.3333333	72.66666667	1	1	0	1	1	1	0	0	1	≥25	1	1	Female	60 and above years	Non-Hispanic Black	High School	Widowed/Divorced/Separated	2	Never	0	Inactive
63236	2	98	105	116	14	25	21	4.1	9.3	3	116	6.439	8.39	50.34	5.9	0	43	1.4	0.7	3.5	155	320	0	0.213	1793	2011-2012	136.6666667	63.33333333	1	1	0	0	0	0	0	0	0	≥25	0	1	Male	60 and above years	Other Hispanic	High School	Widowed/Divorced/Separated	2	Never	2100	Medium activity
63242	3	91	90.2	82	40	34	33	4.2	9.2	3.2	105	5.829	6.57	39.42	6.3	73	72	1.7	0.4	3.5	236	4.6	0	0.053	3066	2011-2012	110	52	0	0	0	0	0	0	0	0	0	≥25	0	0	Male	60 and above years	Mexican American	Middle school or lower	Married or living with a partner	1	Current	4800	High activity
63248	1	101	102.4	148	46	32	40	4.2	9.6	3.2	158	8.771	15.75	94.5	6.8	0	47	0.9	0.4	3.9	86	1.9	0	0.0885	2200	2011-2012	132.6666667	61.33333333	1	1	1	1	1	1	0	0	1	≥25	1	1	Male	60 and above years	Non-Hispanic White	Middle school or lower	Married or living with a partner	4	Current	5880	High activity
63263	2	93	102.9	147	20	23	28	4.1	9.2	3.1	131	7.272	12.46	74.76	6.4	143	40	1.6	0.6	3.5	262	6.6	0	0.112	2257.5	2011-2012	155.3333333	84.66666667	1	0	0	1	1	1	0	0	1	≥25	1	1	Male	40-59 years	Other Hispanic	High School	Married or living with a partner	2	Never	7200	High activity
63276	2	97	138.5	192	16	13	16	4.2	9.4	2.5	110	6.106	17.78	106.68	6	0	34	2.8	0.7	6.8	284	1.7	0	1.428	2748	2011-2012	127.3333333	72	1	0	0	1	1	1	0	0	1	≥25	1	1	Male	60 and above years	Non-Hispanic White	Middle school or lower	Widowed/Divorced/Separated	1	Never	0	Inactive
63293	2	98	84.1	70	17	21	25	4.6	9.5	3.1	97	5.384	7.01	42.06	5.4	126	85	1.9	0.6	3.7	241	0.6	0	0.4825	1221.5	2011-2012	118.6666667	49.33333333	0	0	0	0	0	0	0	0	0	≥25	0	0	Female	60 and above years	Mexican American	Middle school or lower	Widowed/Divorced/Separated	2	Never	8400	High activity
63298	1	90	65.8	65	10	10	15	4.8	9.4	2.5	96	5.329	14.16	84.96	5	92	64	2.1	0.3	3.6	186	4.7	0	0.1565	1617	2011-2012	106	65.33333333	0	0	0	0	0	0	0	0	0	<25	0	0	Female	20-39 years	Other Race-Including Multi-Racial	College or above	Never Married	3	Never	2000	Medium activity
63302	1	101	88.2	151	15	29	30	4.5	9.4	2.3	89	4.94	4.04	24.24	5	55	61	1.7	0.6	3	218	2.8	28.1	0.109	2011.5	2011-2012	116.6666667	66.66666667	0	0	0	0	0	0	0	0	0	<25	0	0	Male	20-39 years	Non-Hispanic White	High School	Never Married	2	Current	11120	High activity
63305	2	94	93	76	70	31	30	4.4	9.3	2.3	102	5.662	4.71	28.26	5.1	48	49	1.5	0.3	2.5	222	4.8	0	0.3285	2272.5	2011-2012	106.6666667	56.66666667	0	0	0	0	0	0	0	0	0	≥25	0	0	Male	20-39 years	Non-Hispanic White	High School	Widowed/Divorced/Separated	2	Former	0	Inactive
63323	3	91	70.7	162	16	13	17	4.2	9.1	2.9	86	4.774	7.53	45.18	5.2	96	75	1.4	0.2	3.4	226	12.8	19.4	0.36	1581.5	2011-2012	126.6666667	78	0	0	0	0	0	0	0	0	0	<25	0	0	Female	40-59 years	Other Race-Including Multi-Racial	College or above	Married or living with a partner	4	Never	160	Low activity
63331	2	95	145.3	283	41	35	73	3.9	9	3.7	192	10.658	60.9	365.4	8	0	21	1.8	0.4	6	314	19.9	0	0.0355	1051	2011-2012	132.6666667	76	1	1	0	1	1	1	0	0	1	≥25	1	1	Female	20-39 years	Non-Hispanic White	High School	Married or living with a partner	2	Current	1260	Low activity
63340	1	94	104.1	113	26	23	18	4.7	9.5	2.3	92	5.107	39.05	234.3	5.3	72	39	2.1	0.6	4.1	175	5.1	0	0.4455	2524	2011-2012	121.3333333	77.33333333	0	0	0	1	1	1	0	0	1	≥25	1	0	Male	20-39 years	Non-Hispanic White	High School	Married or living with a partner	1	Current	9600	High activity
63357	2	97	114	189	15	22	22	4.3	9.4	2.8	96	5.329	40.27	241.62	5.2	126	52	1.5	0.4	4	242	29.2	0	0.062	1782	2011-2012	110	74	0	0	0	1	1	1	0	0	1	≥25	1	0	Female	20-39 years	Mexican American	Middle school or lower	Married or living with a partner	1	Never	0	Inactive
63360	2	93	76.1	104	16	9	20	3.2	9.4	3	99	5.495	18.02	108.12	5.4	0	46	2.6	1.5	10.8	330	15.3	0	0.1185	1234.5	2011-2012	114.6666667	64	0	0	0	0	0	0	0	0	0	<25	0	0	Female	60 and above years	Non-Hispanic White	Middle school or lower	Widowed/Divorced/Separated	3	Never	0	Inactive
63385	1	100	106.8	67	60	18	24	3.9	9.2	2.9	102	5.662	6.98	41.88	5.1	119	87	1.1	0.3	2.9	233	4.5	0	NA	0	2011-2012	145.3333333	79.33333333	0	0	0	0	1	1	0	0	0	≥25	0	0	Female	60 and above years	Non-Hispanic Black	High School	Married or living with a partner	3	Never	900	Low activity
63400	2	90	97.1	57	27	19	26	4.2	9	2.6	90	4.996	3.96	23.76	5.2	98	70	1.5	0.6	2.5	275	31	0	0	704	2011-2012	119.3333333	67.33333333	0	0	0	0	0	0	0	0	0	≥25	0	0	Female	20-39 years	Non-Hispanic Black	College or above	Married or living with a partner	2	Never	1020	Low activity
63456	1	98	81.6	104	12	12	22	3.8	9.3	3.9	89	4.94	4.57	27.42	6	80	42	2	0.8	5.6	251	17.4	0	0.81	2898	2011-2012	116	68	0	0	0	0	0	0	0	0	0	<25	0	0	Male	60 and above years	Mexican American	High School	Widowed/Divorced/Separated	4	Current	0	Inactive
63472	1	91	94.6	86	12	14	15	4.2	9.1	2.4	90	4.996	4.79	28.74	4.9	65	52	3.3	0.8	3.4	216	4.2	0	0.12	1905.5	2011-2012	87.33333333	46.66666667	0	0	0	0	0	0	0	0	0	<25	0	0	Female	20-39 years	Non-Hispanic White	High School	Married or living with a partner	2	Current	4160	High activity
63489	2	92	125.2	153	26	68	42	4.4	9.1	3	105	5.829	40.25	241.5	5.3	79	37	1.7	0.4	2.3	162	6.5	0	0.1225	2092.5	2011-2012	129.3333333	74	0	0	0	1	1	1	0	0	1	≥25	1	1	Male	20-39 years	Non-Hispanic White	College or above	Married or living with a partner	4	Never	1360	Low activity
63515	1	98	95.2	174	76	21	36	4.3	9.4	2.9	89	4.94	10.66	63.96	5.6	93	62	2	0.3	2.4	222	4.2	9.3	0.248	1391.5	2011-2012	98	71.33333333	0	0	0	1	1	1	0	0	1	≥25	1	0	Female	40-59 years	Non-Hispanic White	High School	Married or living with a partner	4	Never	480	Low activity
63519	1	96	95.4	37	17	24	20	4.5	9.1	2.7	96	5.329	4.14	24.84	5.4	115	42	1.4	0.3	2.2	181	34.8	8.25	0.166	2126	2011-2012	127.3333333	72.66666667	0	0	0	0	0	0	0	0	0	≥25	0	0	Male	40-59 years	Non-Hispanic Black	College or above	Widowed/Divorced/Separated	3	Current	2880	Medium activity
63523	1	93	75.5	55	20	17	25	4.4	9.8	3.2	98	5.44	10.84	65.04	5.4	106	69	2	0.7	4	272	0.6	12.45	0.0705	1305.5	2011-2012	104.6666667	70.66666667	0	0	0	0	0	0	0	0	0	<25	0	0	Female	20-39 years	Other Race-Including Multi-Racial	College or above	Never Married	3	Never	2400	Medium activity
63551	2	103	94.3	114	13	19	20	3.9	9.2	2.4	94	5.218	8.8	52.8	5.1	110	51	1.2	0.5	4.6	201	16.6	9.35	0.09	1541.5	2011-2012	130	72.66666667	0	0	0	0	0	0	0	0	0	≥25	0	0	Female	40-59 years	Non-Hispanic White	High School	Married or living with a partner	3	Never	240	Low activity
63571	1	99	85	59	20	28	30	4.6	9.2	2.7	102	5.662	7.67	46.02	4.3	97	59	1.4	0.3	1.8	220	5.2	0	0.11	1982.5	2011-2012	113	78	0	0	0	0	0	0	0	0	0	≥25	0	0	Male	20-39 years	Other Race-Including Multi-Racial	Middle school or lower	Married or living with a partner	3	Never	1440	Low activity
63572	2	92	95.8	94	18	19	20	4	9.2	2.7	77	4.274	7.92	47.52	4.9	81	51	2	0.4	3.4	206	6.4	25.2	0.1805	1936	2011-2012	106.6666667	72	0	0	0	0	1	1	0	1	0	≥25	0	0	Female	20-39 years	Non-Hispanic White	College or above	Never Married	3	Never	10440	High activity
63602	2	93	73.8	226	63	51	46	4.5	10.2	3.1	275	15.265	1.83	10.98	11.5	0	60	1.4	0.4	3.6	141	14.6	18.7	0	1088	2011-2012	127	79	1	0	0	0	0	0	0	0	0	<25	0	0	Male	20-39 years	Non-Hispanic Black	High School	Married or living with a partner	1	Never	5760	High activity
63607	1	90	100.5	99	24	18	17	4.5	9.2	2.8	87	4.829	8.09	48.54	5.1	81	42	1.7	0.4	2.4	234	13.4	0	0.239	2548.5	2011-2012	118.6666667	80	0	0	0	0	0	0	0	0	0	≥25	0	0	Male	40-59 years	Mexican American	Middle school or lower	Married or living with a partner	4	Never	200	Low activity
63614	2	97	102.4	113	6	13	17	4.4	9.3	2.6	107	5.94	7.43	44.58	6.2	71	42	3.1	0.4	4.1	210	10	0	0.2135	1448.5	2011-2012	98.66666667	54.66666667	0	0	0	0	0	0	0	0	0	≥25	0	0	Female	40-59 years	Non-Hispanic White	Middle school or lower	Widowed/Divorced/Separated	1	Current	120	Low activity
63625	3	92	82.1	46	12	12	22	4.3	9.7	3.4	95	5.273	14.02	84.12	5.7	93	62	1.6	0.4	3.2	273	305	0	0.064	3525.5	2011-2012	106.6666667	73.33333333	0	0	0	0	0	0	0	0	0	<25	0	0	Female	20-39 years	Mexican American	High School	Married or living with a partner	1	Never	0	Inactive
63629	3	91	76.8	34	31	39	34	4.3	9.1	4	90	4.996	5.46	32.76	5.6	87	70	1.5	0.4	3.9	185	0.6	0.25	0	2292.5	2011-2012	98	51.33333333	0	0	0	0	0	0	0	0	0	<25	0	0	Female	20-39 years	Other Race-Including Multi-Racial	College or above	Married or living with a partner	3	Never	600	Low activity
63632	1	95	86	86	61	25	42	4.4	9.8	2	117	6.495	5.93	35.58	5.8	203	58	1.2	0.4	2.8	176	1040	0	0.086	1351.5	2011-2012	177.3333333	90	1	1	1	0	0	0	0	0	0	<25	0	0	Female	60 and above years	Non-Hispanic White	High School	Married or living with a partner	3	Never	0	Inactive
63633	2	99	110.2	64	33	31	25	4.1	9.3	3.3	317	17.597	12.05	72.3	10.2	0	37	1.6	0.4	3.9	127	322.5	31.1	0.2225	2517.5	2011-2012	166.6666667	92	1	0	0	1	1	1	0	1	0	≥25	1	1	Male	40-59 years	Non-Hispanic Black	College or above	Married or living with a partner	4	Never	2880	Medium activity
63664	2	91	98	212	25	23	19	4.4	9.2	2.3	304	16.875	8.47	50.82	10.6	0	58	1.1	0.5	3.3	258	11.2	0	0.227	4267	2011-2012	138.6666667	76	1	0	0	1	1	1	0	0	1	≥25	1	1	Male	40-59 years	Other Race-Including Multi-Racial	College or above	Widowed/Divorced/Separated	4	Never	1440	Low activity
63673	1	101	112.6	87	26	18	20	4.2	9	3.3	103	5.718	6.22	37.32	4.8	75	69	1.9	0.6	5	280	3.3	0	0.356	1933.5	2011-2012	163.3333333	114	0	0	0	0	1	1	0	0	0	≥25	0	0	Male	40-59 years	Non-Hispanic White	Middle school or lower	Married or living with a partner	1	Current	4320	High activity
63684	2	93	99.8	79	84	22	28	4	9.3	3.4	108	5.995	17.87	107.22	5.5	119	58	1.4	0.4	2.7	191	23.6	0	0.0015	2013.5	2011-2012	136	83.33333333	0	0	0	1	1	1	0	0	1	≥25	1	0	Female	40-59 years	Non-Hispanic Black	High School	Widowed/Divorced/Separated	3	Never	3840	High activity
63685	3	91	87.3	126	16	20	19	4.1	8.9	2.6	97	5.384	6.14	36.84	5.4	104	50	1.9	0.3	3.4	284	5.1	0	0.019	1739	2011-2012	99.33333333	60.66666667	0	0	0	0	0	0	0	0	0	≥25	0	0	Female	60 and above years	Other Hispanic	High School	Married or living with a partner	1	Never	4320	High activity
63697	1	96	92.1	22	16	23	37	4.4	9.1	3	94	5.218	5.31	31.86	5.6	75	37	1.7	0.3	3.9	155	7.1	0	0	2161	2011-2012	122.6666667	76.66666667	0	0	0	0	0	0	0	0	0	≥25	0	0	Male	40-59 years	Non-Hispanic Black	College or above	Married or living with a partner	3	Never	4320	High activity
63700	1	96	109	63	20	16	16	4.2	9.6	3	71	3.941	6.46	38.76	10.5	0	43	1.8	0.5	5.6	225	190	0	0.048	1298	2011-2012	144.6666667	96.66666667	1	0	0	0	1	1	0	0	0	≥25	0	1	Male	40-59 years	Non-Hispanic Black	High School	Widowed/Divorced/Separated	3	Never	6600	High activity
63736	2	101	116.1	118	33	30	30	4.3	9.4	2.9	116	6.439	25.62	153.72	6.4	123	39	3.2	0.9	7.5	229	75.4	83.65	0.0705	5056	2011-2012	154	106	0	0	0	1	1	1	0	1	0	≥25	1	1	Male	20-39 years	Non-Hispanic Black	High School	Married or living with a partner	2	Current	7020	High activity
63752	1	94	99.7	122	17	20	25	3.9	8.3	2.8	109	6.051	17.27	103.62	5.9	244	36	3.4	0.6	4.4	260	6.2	0	0.1085	2349.5	2011-2012	113.3333333	70	1	0	0	1	0	1	0	0	1	≥25	1	0	Male	60 and above years	Non-Hispanic White	High School	Widowed/Divorced/Separated	2	Current	0	Inactive
63759	1	99	86	115	12	20	22	4.5	9.5	2.7	96	5.329	8.95	53.7	5	95	44	0.9	0.6	3.9	185	4.5	0	0.0585	2374.5	2011-2012	124.6666667	82.66666667	0	0	0	0	0	0	0	0	0	<25	0	0	Male	40-59 years	Non-Hispanic White	College or above	Married or living with a partner	4	Never	240	Low activity
63787	1	95	80.7	44	17	13	19	4.8	9.3	2.8	111	6.162	4.17	25.02	5.4	88	45	1.4	0.4	2.7	203	1.8	5.45	0.1535	3159	2011-2012	125.3333333	71.33333333	0	0	0	0	0	0	0	0	0	<25	0	0	Male	20-39 years	Non-Hispanic White	High School	Married or living with a partner	1	Never	15600	High activity
63813	1	93	94.9	46	15	14	19	4.5	9.9	2.7	156	8.66	6.04	36.24	6.7	0	59	1.6	0.3	2.8	186	18.4	0	NA	0	2011-2012	160	74	1	0	0	0	0	0	0	0	0	<25	0	0	Male	60 and above years	Non-Hispanic Black	College or above	Widowed/Divorced/Separated	2	Never	600	Low activity
63845	1	94	107.1	83	34	44	25	4.7	9.3	3	137	7.605	9.67	58.02	5.5	206	43	2.1	0.5	3	275	52	81.85	0.079	1918	2011-2012	146.6666667	85.33333333	1	0	0	1	1	1	0	1	0	≥25	1	1	Male	40-59 years	Non-Hispanic White	High School	Widowed/Divorced/Separated	2	Current	6480	High activity
63859	2	99	115	109	136	112	77	4	9.1	3.2	89	4.94	26.33	157.98	5.3	0	48	3.2	0.6	3.9	175	7.6	56.2	0	2349	2011-2012	149.3333333	95.33333333	0	0	0	1	1	1	1	1	0	≥25	1	0	Male	40-59 years	Non-Hispanic Black	High School	Married or living with a partner	1	Current	700	Low activity
63860	3	90	90.3	75	12	17	21	4.2	9.5	2.6	118	6.55	11.15	66.9	5.7	124	61	1.6	0.4	2.3	185	4	0	0.1015	1325	2011-2012	114	70	0	0	0	0	0	0	0	0	0	≥25	0	0	Female	40-59 years	Other Race-Including Multi-Racial	High School	Married or living with a partner	3	Never	2760	Medium activity
63877	2	101	64.7	28	8	15	21	4.6	10.1	3.7	85	4.718	5.35	32.1	4.9	91	72	2.2	0.5	5	247	98.6	0	0	1239.5	2011-2012	101.3333333	42	0	0	0	0	0	0	0	0	0	<25	0	0	Female	20-39 years	Non-Hispanic Black	High School	Never Married	1	Never	2520	Medium activity
63916	1	94	129.5	100	30	40	27	4	9.2	3	308	17.097	21.72	130.32	12.6	451	34	2.2	0.7	5.1	159	14.6	0	0.3295	2253.5	2011-2012	115.3333333	54	1	0	0	1	1	1	0	0	1	≥25	1	1	Male	20-39 years	Non-Hispanic White	Middle school or lower	Married or living with a partner	1	Current	960	Low activity
63923	2	90	100.5	70	12	19	17	3.9	9.1	3	91	5.051	9.8	58.8	5	96	84	1.7	0.4	2.9	248	4.9	23	0.1875	3039	2011-2012	107.3333333	76.66666667	0	0	0	0	0	0	0	1	0	≥25	0	0	Female	40-59 years	Non-Hispanic Black	College or above	Married or living with a partner	4	Current	320	Low activity
63941	3	91	78.9	83	13	19	27	4.7	9.8	3.4	90	4.996	8.95	53.7	5.4	102	51	1.7	0.3	2.4	294	3.2	0	0	2362.5	2011-2012	135.3333333	77.33333333	0	0	0	0	0	0	0	0	0	<25	0	0	Female	40-59 years	Other Race-Including Multi-Racial	College or above	Married or living with a partner	3	Never	0	Inactive
63967	2	101	78.5	66	12	10	14	4.5	9	2.5	90	4.996	9.15	54.9	5	0	72	2.5	0.3	2.1	240	8.7	0	NA	0	2011-2012	111.3333333	74	0	0	0	0	0	0	0	0	0	<25	0	0	Female	20-39 years	Other Race-Including Multi-Racial	College or above	Never Married	2	Current	0	Inactive
64021	1	102	103.2	151	20	29	33	4.2	9.4	2.9	108	5.995	26.45	158.7	5.8	126	44	2.1	0.3	3.7	225	2.6	0	0.272	1568.5	2011-2012	129	70	0	0	0	1	1	1	0	0	1	≥25	1	1	Female	60 and above years	Mexican American	College or above	Married or living with a partner	4	Never	960	Low activity
64025	2	92	93.7	69	22	41	57	5	9.4	2.6	80	4.441	7.08	42.48	5.1	119	58	1	0.5	1.7	213	13.2	0	0	1806.5	2011-2012	118.6666667	78	0	0	0	0	0	0	0	0	0	≥25	0	0	Male	20-39 years	Non-Hispanic White	College or above	Married or living with a partner	4	Current	2220	Medium activity
64029	2	98	105.4	123	22	20	19	4.9	10	3.6	108	5.995	8.04	48.24	5.3	83	49	2.6	0.5	5.8	256	18.5	0	0	311.5	2011-2012	118	74	0	0	0	0	1	1	0	0	0	≥25	0	0	Male	20-39 years	Mexican American	High School	Never Married	2	Current	4080	High activity
64036	1	98	120.1	141	70	13	22	4	9.3	3.4	110	6.106	6.51	39.06	7.4	0	49	1.4	0.8	11.1	254	50	0	0.593	1649	2011-2012	150	67.33333333	1	0	0	1	1	1	0	0	1	≥25	1	1	Male	60 and above years	Non-Hispanic White	High School	Married or living with a partner	2	Current	40	Low activity
64042	2	94	92.5	209	23	32	28	4.8	9.4	2.8	92	5.107	5.96	35.76	5.6	102	36	1.7	0.5	4.1	198	7.7	7	0.119	1001.5	2011-2012	127	83	0	0	0	0	0	0	0	0	0	≥25	0	0	Male	20-39 years	Non-Hispanic White	Middle school or lower	Married or living with a partner	2	Never	7800	High activity
64089	1	96	114.3	40	14	17	18	3.9	10.2	2.6	108	5.995	31.25	187.5	5.4	89	77	1.5	0.3	3.7	285	8.9	0	0.0255	1700	2011-2012	135.3333333	81.33333333	0	0	0	1	1	1	0	0	1	≥25	1	0	Female	40-59 years	Other Race-Including Multi-Racial	College or above	Married or living with a partner	4	Never	1440	Low activity
64095	2	102	106.2	141	14	38	28	4.4	9.2	2.4	91	5.051	7.29	43.74	5.2	92	47	1.8	0.4	2.7	195	1.7	0	0.003	2684.5	2011-2012	116.6666667	71.33333333	0	0	0	0	1	1	0	0	0	≥25	0	0	Male	20-39 years	Non-Hispanic White	College or above	Married or living with a partner	4	Never	7580	High activity
64111	2	90	112	76	15	20	28	4.2	9.3	3.1	106	5.884	24.27	145.62	5.5	146	42	3.1	0.4	3.1	253	8.3	0	0.4595	8281	2011-2012	114	57.33333333	0	0	0	0	1	1	0	0	0	≥25	0	0	Female	20-39 years	Non-Hispanic Black	Middle school or lower	Never Married	1	Current	0	Inactive
64127	2	102	103.7	121	17	25	24	3.8	9.2	3.2	174	9.659	16.43	98.58	7.8	0	40	1.9	0.4	5.6	291	22.4	0	0.106	981	2011-2012	110	51.33333333	1	0	0	1	1	1	0	0	1	≥25	1	1	Female	60 and above years	Other Race-Including Multi-Racial	High School	Married or living with a partner	2	Never	240	Low activity
64139	2	97	80	61	13	15	19	4.2	9	2.8	91	5.051	10.74	64.44	5.4	82	45	1.7	0.4	3	242	7.9	0	NA	0	2011-2012	101.3333333	70.66666667	0	0	0	0	0	0	0	0	0	≥25	0	0	Female	20-39 years	Other Hispanic	Middle school or lower	Married or living with a partner	1	Never	0	Inactive
64167	2	101	65.6	63	8	13	18	4.9	9.5	2.7	87	4.829	3.6	21.6	5.2	95	65	2.6	0.3	3	290	6.5	0	0.004	2863	2011-2012	92.66666667	66	0	0	0	0	0	0	0	0	0	<25	0	0	Female	20-39 years	Other Race-Including Multi-Racial	High School	Never Married	1	Never	1200	Low activity
64203	1	101	98.7	44	24	35	30	4.1	9.1	2.7	97	5.384	8.94	53.64	5.2	85	68	1.8	0.5	3.1	253	5	39.1	0.375	4357.5	2011-2012	124	70	0	0	0	0	0	0	0	1	0	≥25	0	0	Male	20-39 years	Non-Hispanic White	Middle school or lower	Married or living with a partner	1	Current	18000	High activity
64222	3	91	92.1	140	15	22	23	4.8	9.8	2.8	97	5.384	6.3	37.8	4.8	91	47	2.2	0.6	3	231	7.4	6.7	0.1845	1968.5	2011-2012	120.6666667	76.66666667	0	0	0	0	0	0	0	0	0	<25	0	0	Male	20-39 years	Non-Hispanic White	College or above	Married or living with a partner	3	Never	7920	High activity
64244	1	99	80.2	45	30	17	19	4	9.3	3.1	92	5.107	6.02	36.12	5.4	110	67	2.2	0.3	3.7	239	2.2	12.1	0.1905	2347.5	2011-2012	101.3333333	70.66666667	0	0	0	0	0	0	0	0	0	<25	0	0	Female	40-59 years	Non-Hispanic White	College or above	Never Married	1	Current	0	Inactive
64263	2	97	78.3	116	17	14	18	3.8	8.9	2.9	99	5.495	8.12	48.72	5.3	0	62	1	0.2	2.3	182	4	0	0.0295	1835.5	2011-2012	121	70	0	0	0	0	0	0	0	0	0	≥25	0	0	Female	60 and above years	Mexican American	College or above	Married or living with a partner	2	Never	320	Low activity
64266	2	99	95.6	67	19	28	26	4.3	9.4	2.4	100	5.551	12.12	72.72	5.1	79	45	1.8	0.7	3.2	206	4.1	134.85	0.26	3291	2011-2012	114.6666667	63.33333333	0	0	0	0	0	0	0	1	0	≥25	0	0	Male	20-39 years	Non-Hispanic White	College or above	Married or living with a partner	4	Never	8160	High activity
64286	1	103	85.8	93	16	17	25	4.7	10.6	3.2	78	4.33	35.17	211.02	5	0	66	1.4	0.4	3.1	185	1.4	0	NA	0	2011-2012	108.6666667	72	0	0	0	1	0	1	0	0	1	<25	1	0	Female	40-59 years	Other Race-Including Multi-Racial	College or above	Married or living with a partner	4	Never	1260	Low activity
64290	1	99	122.5	46	20	14	17	3.8	9.2	2.9	110	6.106	8.83	52.98	6	145	58	1.6	0.5	3.6	153	2	0	0	1566	2011-2012	133	76	0	1	0	0	1	1	1	0	0	≥25	0	1	Female	60 and above years	Non-Hispanic Black	College or above	Widowed/Divorced/Separated	2	Never	2940	Medium activity
64333	2	96	86.3	182	23	22	21	5	9.7	2.7	102	5.662	12.24	73.44	5.9	110	59	1.7	0.3	2.2	256	0.9	0	0.224	2202.5	2011-2012	97.33333333	60.66666667	0	0	0	0	0	0	0	0	0	≥25	0	0	Male	40-59 years	Other Race-Including Multi-Racial	High School	Widowed/Divorced/Separated	2	Never	5160	High activity
64437	2	95	97.1	50	16	13	15	4.1	9.3	3.1	88	4.885	11.03	66.18	5.1	94	48	2.6	0.5	4.3	313	10.8	5.8	0.0215	1790.5	2011-2012	104.6666667	53.33333333	0	0	0	0	0	0	0	0	0	≥25	0	0	Female	20-39 years	Non-Hispanic Black	Middle school or lower	Never Married	1	Former	120	Low activity
64439	2	98	97.3	376	37	34	27	4.7	9.8	3.1	101	5.607	21.8	130.8	5	111	41	1.2	0.7	4.1	293	18	0	0.1805	2407	2011-2012	125.3333333	80.66666667	0	0	0	1	1	1	0	0	1	≥25	1	0	Male	40-59 years	Non-Hispanic White	High School	Married or living with a partner	4	Never	4440	High activity
64447	1	101	85	171	13	11	15	4.1	9.2	2.6	94	5.218	6.37	38.22	5.7	0	41	2.5	0.7	3.4	214	2.2	0	0.1025	1840.5	2011-2012	111.3333333	73.33333333	0	0	0	0	0	0	0	0	0	<25	0	0	Female	40-59 years	Non-Hispanic White	High School	Never Married	1	Current	5040	High activity
64471	2	92	85.5	45	8	11	15	4.3	9.6	2.8	90	4.996	5.11	30.66	5.4	0	78	1.5	0.3	3	228	13	0	0.077	1411	2011-2012	98.66666667	70.66666667	0	0	0	0	0	0	0	0	0	≥25	0	0	Female	20-39 years	Non-Hispanic White	College or above	Married or living with a partner	4	Never	1360	Low activity
64497	1	94	112.1	295	416	38	30	4.6	10.1	3.1	115	6.384	26.12	156.72	6	207	51	1.6	0.6	3.2	412	9.2	0	1.2385	1643.5	2011-2012	144	94	1	0	0	1	1	1	0	0	1	≥25	1	1	Male	60 and above years	Non-Hispanic White	Middle school or lower	Never Married	2	Current	0	Inactive
64532	2	99	92.8	58	13	15	24	4	9.1	3.3	95	5.273	13.82	82.92	5.7	113	56	2.6	0.4	6.6	180	1.3	0	NA	0	2011-2012	112.6666667	86.66666667	0	0	0	0	0	0	0	0	0	≥25	0	0	Female	40-59 years	Non-Hispanic Black	College or above	Married or living with a partner	4	Never	1380	Low activity
64544	2	100	102.4	104	13	27	33	4.8	9.6	3.1	104	5.773	11.86	71.16	6.1	0	52	1.7	0.4	2.5	206	5.8	15.6	0.0735	2081.5	2011-2012	109.3333333	73.33333333	0	0	0	0	0	0	0	0	0	≥25	0	0	Male	60 and above years	Other Race-Including Multi-Racial	College or above	Married or living with a partner	4	Never	540	Low activity
64567	1	100	91	167	21	30	27	4.4	9.5	2.3	104	5.773	6.15	36.9	5.4	98	40	1.3	0.6	3	205	3.5	10.9	0.2615	2700	2011-2012	112	67.33333333	0	0	0	0	0	0	0	0	0	<25	0	0	Male	20-39 years	Other Hispanic	College or above	Married or living with a partner	4	Current	1120	Low activity
64591	3	92	92.4	56	14	18	19	4.3	9.3	4.4	110	6.106	11.8	70.8	4.8	129	48	1.9	0.3	2.4	169	13	0	0.165	1997	2011-2012	140.6666667	68	0	0	0	0	0	0	0	0	0	≥25	0	0	Male	40-59 years	Non-Hispanic Black	Middle school or lower	Married or living with a partner	2	Current	0	Inactive
64602	2	94	84.3	258	17	19	21	4.7	9.5	2.9	93	5.162	10.82	64.92	5.8	117	54	1.3	0.1	2.9	315	1.2	0	0.1865	1600.5	2011-2012	126	71.33333333	0	0	0	0	0	0	0	0	0	<25	0	0	Female	60 and above years	Mexican American	High School	Widowed/Divorced/Separated	4	Current	640	Low activity
64611	2	100	137	102	42	36	29	4.1	8.8	2.3	123	6.828	16.97	101.82	6.3	0	42	2	0.2	1.3	190	2.9	0	0.0655	2210.5	2011-2012	107.3333333	62	1	1	0	1	1	1	0	0	1	≥25	1	0	Male	40-59 years	Non-Hispanic Black	College or above	Married or living with a partner	3	Never	7280	High activity
64632	2	91	101.6	70	15	20	18	4.3	9.4	2.9	95	5.273	14.58	87.48	6	36	39	3.2	0.6	3.9	306	4	0	0.2455	2097.5	2011-2012	132.6666667	62.66666667	0	0	0	0	0	0	0	0	0	≥25	0	0	Male	20-39 years	Other Hispanic	High School	Never Married	4	Current	12000	High activity
64646	1	91	95	123	27	33	38	4.7	9.5	2.9	100	5.551	9.08	54.48	5.5	125	34	1.9	0.8	7.1	208	29.2	0	0.075	2617.5	2011-2012	143.3333333	56.66666667	0	0	0	0	0	0	0	0	0	≥25	0	0	Male	60 and above years	Non-Hispanic White	High School	Married or living with a partner	3	Current	1920	Medium activity
64651	3	91	111.3	71	20	24	28	3.5	8.3	2.8	108	5.995	10.95	65.7	6	143	38	2.9	0.8	5.6	339	7.9	0	NA	0	2011-2012	124.6666667	74	0	0	0	1	1	1	0	0	1	≥25	1	0	Male	40-59 years	Non-Hispanic White	High School	Never Married	2	Current	8400	High activity
64664	1	98	105	63	16	15	18	3.8	9.2	2.7	93	5.162	9.18	55.08	5	124	51	1.7	0.4	3.3	363	7	0	0.133	2414.5	2011-2012	130	90	0	0	0	0	1	1	0	0	0	≥25	0	0	Female	40-59 years	Non-Hispanic White	College or above	Widowed/Divorced/Separated	2	Never	720	Low activity
64672	2	100	79.6	54	28	48	42	4.5	10	3	84	4.663	2.98	17.88	5.4	76	14	2.8	0.3	1.2	264	17.4	0	0	1645.5	2011-2012	114.6666667	63.33333333	0	0	0	0	0	0	0	0	0	≥25	0	0	Male	20-39 years	Non-Hispanic Black	High School	Never Married	2	Never	6400	High activity
64674	1	100	85	77	9	12	20	4.5	9.7	2.8	83	4.607	7.04	42.24	4.9	42	72	2.1	0.3	1.9	275	4.1	0	0.044	1897	2011-2012	100.6666667	70.66666667	0	0	0	0	0	0	0	0	0	≥25	0	0	Female	20-39 years	Mexican American	Middle school or lower	Married or living with a partner	2	Never	1560	Low activity
64689	2	103	85.6	148	20	12	30	4.2	9.3	2.9	96	5.329	11.21	67.26	5.6	91	52	1.7	0.4	3.7	221	2.5	0	0.096	1368.5	2011-2012	109.3333333	76.66666667	0	0	0	0	0	0	0	0	0	≥25	0	0	Female	40-59 years	Mexican American	Middle school or lower	Never Married	1	Never	80	Low activity
64726	2	95	101.2	81	14	13	19	4.1	9	2.8	99	5.495	6.88	41.28	5.7	97	63	1.6	0.6	4	188	5.4	0	0.0865	1600	2011-2012	120.6666667	65.33333333	0	0	0	0	0	0	0	0	0	≥25	0	0	Male	40-59 years	Non-Hispanic Black	Middle school or lower	Married or living with a partner	2	Current	3120	Medium activity
64739	1	97	90.8	59	12	14	16	3.9	9.1	2.8	98	5.44	30.72	184.32	5.2	0	63	1.5	0.4	1.5	243	9	0	NA	0	2011-2012	112.6666667	64	0	0	0	0	0	0	0	0	0	≥25	0	0	Female	20-39 years	Non-Hispanic Black	High School	Never Married	4	Never	6720	High activity
64746	2	99	102.3	129	33	29	23	4.4	9.5	2.7	97	5.384	6.27	37.62	5.3	79	43	2.4	0.6	3.7	121	6.4	0	0.1105	2219.5	2011-2012	115.3333333	78.66666667	0	0	0	0	1	1	0	0	0	≥25	0	0	Male	20-39 years	Non-Hispanic Black	College or above	Never Married	4	Former	17400	High activity
64771	2	96	99.1	86	39	20	28	3.8	8.9	3.3	96	5.329	10.44	62.64	5.6	119	35	0.9	0.4	5.5	279	6	0	0.082	2753.5	2011-2012	94	52.66666667	0	0	0	1	0	1	0	0	1	≥25	1	0	Male	60 and above years	Mexican American	High School	Widowed/Divorced/Separated	1	Current	6720	High activity
64779	2	100	129.2	74	14	18	20	3.9	9.1	2.7	105	5.829	19.47	116.82	5.3	74	48	1.8	0.4	1.7	272	18.7	0	0.066	1335.5	2011-2012	101.3333333	50	0	0	0	0	1	1	0	0	0	≥25	0	0	Female	20-39 years	Non-Hispanic Black	Middle school or lower	Never Married	2	Current	20160	High activity
64782	1	94	80.5	174	25	12	16	4.6	9.4	2.2	115	6.384	6.24	37.44	5.5	0	41	2.6	0.5	8	216	2.4	0	0.299	4435.5	2011-2012	107.3333333	66.66666667	0	0	0	0	0	0	0	0	0	<25	0	0	Male	40-59 years	Non-Hispanic White	High School	Widowed/Divorced/Separated	1	Former	40	Low activity
64805	2	101	142	88	31	36	33	4	9.2	3.1	116	6.439	31.63	189.78	6.1	127	59	1.4	0.3	3.4	184	90	0	0.017	4186	2011-2012	152	108	0	1	0	1	1	1	0	0	1	≥25	1	1	Male	20-39 years	Non-Hispanic Black	Middle school or lower	Never Married	1	Never	720	Low activity
64824	1	97	132.2	304	160	109	135	3.5	8.8	3.7	327	18.152	30.12	180.72	11	0	26	1.4	0.4	3.9	110	14.9	0	0.6265	1103	2011-2012	138	65.33333333	1	1	1	1	1	1	1	0	0	≥25	1	1	Male	60 and above years	Non-Hispanic White	College or above	Widowed/Divorced/Separated	1	Current	0	Inactive
64832	1	91	103	138	21	26	24	4.4	9.4	3.1	96	5.329	11.42	68.52	5.9	148	60	1.5	0.5	2.4	238	24.8	0	0.0215	2444	2011-2012	106.6666667	74.66666667	0	0	0	0	1	1	0	0	0	≥25	0	0	Male	20-39 years	Mexican American	High School	Married or living with a partner	2	Never	560	Low activity
64833	1	92	108.9	95	11	14	16	3.6	8.6	2.7	92	5.107	18.3	109.8	5.7	89	65	1.7	0.3	3	171	16.9	0	0.035	1492.5	2011-2012	115.3333333	73.33333333	0	0	0	1	1	1	0	0	1	≥25	1	0	Female	20-39 years	Mexican American	High School	Married or living with a partner	1	Never	320	Low activity
64843	2	90	115.4	104	17	15	16	4	9.5	2.8	102	5.662	12.76	76.56	5.6	111	47	2.8	0.5	7.7	334	11.6	0	0.3335	2160.5	2011-2012	123.3333333	67.33333333	0	0	0	0	1	1	0	0	0	≥25	0	0	Female	40-59 years	Non-Hispanic Black	Middle school or lower	Married or living with a partner	1	Current	480	Low activity
64866	2	96	84.4	66	7	17	17	4.3	9.4	3.5	106	5.884	5.16	30.96	5.4	0	61	2.1	0.6	2.6	264	2.4	0	0	870	2011-2012	133.3333333	76	0	0	0	0	0	0	0	0	0	≥25	0	0	Female	20-39 years	Non-Hispanic Black	Middle school or lower	Never Married	1	Current	300	Low activity
64871	1	97	86	65	6	12	16	4.2	8.9	2.3	100	5.551	4.52	27.12	5.4	95	54	2.1	0.4	4.6	235	22.4	26.5	0.274	1595.5	2011-2012	88	60	0	0	0	0	0	0	0	1	0	<25	0	0	Female	40-59 years	Non-Hispanic White	College or above	Married or living with a partner	3	Never	720	Low activity
64876	3	91	93.5	47	11	15	17	4	9	2.8	105	5.829	3.81	22.86	5.1	0	72	1.6	0.4	2.6	235	2.2	59.4	0.189	3871	2011-2012	117.3333333	76	0	0	0	0	0	0	0	1	0	<25	0	0	Male	40-59 years	Non-Hispanic White	High School	Widowed/Divorced/Separated	2	Never	8980	High activity
64904	1	95	106.2	76	21	24	23	4.4	9.8	2.9	90	4.996	5.68	34.08	5.5	0	91	2	0.3	4.3	181	31.9	33.5	0.302	967.5	2011-2012	144.6666667	89.33333333	0	0	0	0	0	0	0	1	0	≥25	0	0	Female	40-59 years	Non-Hispanic White	High School	Married or living with a partner	2	Current	19200	High activity
64908	1	102	96.2	86	20	29	21	4.3	9.3	2.8	111	6.162	8.39	50.34	5.7	142	58	1.6	0.3	3.1	245	3.4	0	0.1945	1342	2011-2012	116	48.66666667	0	0	0	0	0	0	0	0	0	≥25	0	0	Female	60 and above years	Mexican American	High School	Widowed/Divorced/Separated	3	Never	360	Low activity
64933	1	90	111.7	81	10	24	18	4	9.2	3.5	86	4.774	6.75	40.5	5.5	91	46	2	0.6	4.4	246	12	0	NA	0	2011-2012	100.6666667	63.33333333	0	0	0	0	0	0	0	0	0	≥25	0	0	Female	40-59 years	Mexican American	College or above	Married or living with a partner	4	Never	0	Inactive
64953	1	101	70.2	74	9	20	24	4.1	9.3	2.8	87	4.829	2.55	15.3	4.7	63	97	1.8	1	7.9	314	3.1	0	0.5365	1906	2011-2012	111.3333333	68	0	0	0	0	0	0	0	0	0	<25	0	0	Female	40-59 years	Non-Hispanic White	High School	Married or living with a partner	2	Never	360	Low activity
64962	2	102	105	39	14	21	24	4	9.1	2.9	88	4.885	4.91	29.46	5.4	101	62	2.2	0.4	3.4	226	10.8	0	0.1245	1462.5	2011-2012	128	72	0	0	0	0	0	0	0	0	0	≥25	0	0	Female	20-39 years	Non-Hispanic Black	High School	Married or living with a partner	3	Never	240	Low activity
64978	1	93	95.1	160	17	27	19	4.8	9.9	2.7	102	5.662	12.5	75	5.5	158	47	1.6	0.2	1.7	233	3.5	0	0.058	2923.5	2011-2012	108	67.33333333	0	0	0	0	0	0	0	0	0	≥25	0	1	Female	40-59 years	Other Hispanic	High School	Married or living with a partner	2	Never	4200	High activity
64998	2	97	116.8	107	22	30	31	4.3	9	2.5	118	6.55	25.57	153.42	5.6	104	38	3.3	0.5	3.8	250	19.1	27.9	0.201	3538	2011-2012	129.3333333	98.66666667	0	0	0	1	1	1	0	0	1	≥25	1	1	Male	40-59 years	Non-Hispanic White	College or above	Never Married	4	Current	2000	Medium activity
65022	2	92	72.6	164	29	20	27	4.3	9.1	2.9	96	5.329	12.49	74.94	5	81	74	1.2	0.2	1.5	182	13.8	42.25	0.1585	1817	2011-2012	116	73.33333333	0	0	0	0	0	0	0	1	0	<25	0	0	Female	20-39 years	Other Race-Including Multi-Racial	College or above	Never Married	4	Never	3040	Medium activity
65032	2	95	92.6	110	12	16	25	4.4	9.4	2.4	102	5.662	11.59	69.54	5.4	124	57	1.4	0.4	3.6	230	38.2	0	0.0705	1446.5	2011-2012	118.6666667	78.66666667	0	0	0	0	0	0	0	0	0	≥25	0	0	Female	60 and above years	Non-Hispanic White	High School	Married or living with a partner	2	Current	2160	Medium activity
65049	2	103	80.7	112	13	17	17	4.5	9.4	2.8	98	5.44	12.84	77.04	4.9	87	44	1.9	0.5	4.3	193	3.9	0	0.026	3359	2011-2012	106	66	0	0	0	0	0	0	0	0	0	<25	0	0	Male	20-39 years	Other Hispanic	High School	Married or living with a partner	3	Never	6720	High activity
65052	3	91	96.8	189	19	28	27	4.5	9.5	2.7	98	5.44	7.74	46.44	4.9	94	43	1.7	0.5	6.7	235	16.8	0	0.127	3023	2011-2012	124	71.33333333	0	0	0	0	0	0	0	0	0	≥25	0	0	Male	40-59 years	Non-Hispanic White	College or above	Widowed/Divorced/Separated	4	Never	2760	Medium activity
65086	1	103	87.3	58	11	48	58	4.5	9.3	2.4	89	4.94	3.21	19.26	5	59	53	1.3	0.4	2.8	184	6.4	7.15	0.0415	2866	2011-2012	92	65.33333333	0	0	0	0	0	0	0	0	0	≥25	0	0	Male	40-59 years	Non-Hispanic White	College or above	Married or living with a partner	4	Never	5040	High activity
65106	1	96	82	156	14	12	17	4.7	9.1	2.7	76	4.219	1.78	10.68	5.5	77	53	1.7	0.3	1.5	180	6.5	14.05	0.1925	2142	2011-2012	136	67.33333333	0	0	0	0	0	0	0	0	0	<25	0	0	Male	20-39 years	Non-Hispanic Black	High School	Married or living with a partner	3	Current	14880	High activity
65149	2	102	98	38	16	19	22	4.4	9.3	2.8	96	5.329	5.82	34.92	5.7	81	57	2.8	0.5	4.6	305	2.9	42.85	0.0555	3288	2011-2012	134	70	0	0	0	0	0	0	0	1	0	≥25	0	0	Male	20-39 years	Non-Hispanic Black	Middle school or lower	Married or living with a partner	1	Never	2160	Medium activity
65174	2	91	102.6	186	18	33	22	3.8	8.9	2.7	118	6.55	21.83	130.98	6	173	34	1.5	0.4	6	195	2.2	53.3	0.169	2187.5	2011-2012	99.33333333	75.33333333	0	0	0	1	1	1	0	1	0	≥25	1	1	Female	20-39 years	Non-Hispanic White	High School	Married or living with a partner	4	Never	960	Low activity
65188	1	93	91.5	435	20	21	20	3.8	8.9	3.8	219	12.157	19.38	116.28	9.6	0	41	1.9	0.8	7	314	51.8	0.2	0.106	1653	2011-2012	120	70	1	0	0	1	1	1	0	0	1	≥25	1	1	Female	60 and above years	Other Race-Including Multi-Racial	High School	Married or living with a partner	4	Never	360	Low activity
65194	1	93	83	93	15	24	23	5	9.4	2.6	92	5.107	3.69	22.14	5.1	67	56	2.4	0.4	2.6	304	2.8	12	0	1945.5	2011-2012	98.66666667	53.33333333	0	0	0	0	0	0	0	0	0	<25	0	0	Male	20-39 years	Other Race-Including Multi-Racial	College or above	Never Married	2	Former	2160	Medium activity
65202	2	102	87	112	12	18	19	4.6	9.5	2.7	94	5.218	6.37	38.22	5.2	99	51	1.8	0.6	3.2	220	3.4	0	0.0505	1920.5	2011-2012	117.3333333	69.33333333	0	0	0	0	0	0	0	0	0	≥25	0	0	Male	40-59 years	Other Hispanic	Middle school or lower	Widowed/Divorced/Separated	1	Current	12720	High activity
65205	2	91	85.2	120	16	22	25	4.7	9.4	2.9	108	5.995	4.42	26.52	5.3	99	53	1.7	0.3	3.4	200	4.1	15.6	0.191	2305.5	2011-2012	112	60.66666667	0	0	0	0	0	0	0	0	0	<25	0	0	Male	40-59 years	Non-Hispanic White	High School	Married or living with a partner	2	Current	13440	High activity
65217	2	92	64.5	61	10	14	14	3.8	8.8	2.7	90	4.996	5.02	30.12	5.3	90	61	1.9	0.4	2	261	8.5	0	0.028	2992	2011-2012	104.6666667	56.66666667	0	0	0	0	0	0	0	0	0	<25	0	0	Female	20-39 years	Other Hispanic	High School	Never Married	1	Never	680	Low activity
65267	2	92	72.8	53	14	14	16	4.7	9.2	2.5	98	5.44	3.18	19.08	4.7	62	55	1.1	0.2	3.1	263	24	0	0.013	3747	2011-2012	109.3333333	78	0	0	0	0	0	0	0	0	0	<25	0	0	Female	20-39 years	Other Race-Including Multi-Racial	College or above	Married or living with a partner	4	Never	3120	Medium activity
65286	2	102	75.7	389	19	19	22	4.4	9.3	2.6	81	4.496	6.61	39.66	5.7	0	58	1.8	0.5	3.3	247	13.5	22.3	0.18	2360	2011-2012	107.3333333	58	0	0	0	0	0	0	0	0	0	<25	0	0	Male	20-39 years	Other Race-Including Multi-Racial	High School	Married or living with a partner	3	Never	960	Low activity
65289	1	98	111.6	122	19	22	22	4.2	9.9	3.3	131	7.272	5.94	35.64	7.4	0	48	1.4	0.3	2.8	279	25	0	0.0055	1188.5	2011-2012	156.6666667	60.66666667	1	0	0	0	1	1	0	0	0	≥25	0	1	Female	60 and above years	Non-Hispanic Black	High School	Married or living with a partner	2	Never	240	Low activity
65298	1	97	89.9	36	21	26	24	4.4	9.6	2.7	94	5.218	5.46	32.76	5	73	52	1.9	0.5	3.1	169	7.6	15.6	0.481	3200	2011-2012	125.3333333	33.33333333	0	0	0	0	0	0	0	0	0	≥25	0	0	Male	40-59 years	Non-Hispanic White	College or above	Married or living with a partner	3	Never	5280	High activity
65310	1	101	137.5	170	21	31	26	4.3	8.8	2.8	101	5.607	38.78	232.68	5.2	107	32	1.4	0.8	6.1	168	33.4	35.65	0.427	2454	2011-2012	118.6666667	68.66666667	0	0	0	1	1	1	0	1	0	≥25	1	1	Male	40-59 years	Non-Hispanic White	Middle school or lower	Widowed/Divorced/Separated	2	Current	9600	High activity
65331	2	95	116.9	67	15	13	17	3.9	9.1	3.2	100	5.551	21.4	128.4	5.7	118	57	3.4	1	4.5	299	22.4	0	0.1235	2623	2011-2012	160.6666667	78	0	0	0	0	1	1	0	0	0	≥25	0	0	Female	40-59 years	Non-Hispanic Black	High School	Never Married	1	Never	1200	Low activity
65348	2	98	100.4	116	17	22	20	4	9.1	3.1	84	4.663	17.53	105.18	4.8	140	91	2	0.6	5.5	225	12.6	45.35	0.0765	2513	2011-2012	138.6666667	72.66666667	0	0	0	0	0	0	0	1	0	≥25	0	0	Female	40-59 years	Non-Hispanic White	College or above	Married or living with a partner	4	Never	840	Low activity
65370	1	94	116.2	186	10	16	17	4.3	9.3	2.3	93	5.162	11.55	69.3	5.1	102	32	1.9	0.3	4.1	231	14.5	0	0.1095	1635.5	2011-2012	109.3333333	68	0	0	0	0	1	1	0	0	0	≥25	0	1	Female	20-39 years	Non-Hispanic White	High School	Married or living with a partner	2	Never	1600	Low activity
65393	1	101	129	226	25	17	28	4.4	9.7	2.2	117	6.495	14.57	87.42	6	196	28	43.7	10.2	0.4	167	12.5	0	0.4495	1799.5	2011-2012	139.3333333	50.66666667	0	1	1	1	1	1	0	0	1	≥25	1	1	Male	60 and above years	Non-Hispanic White	High School	Married or living with a partner	2	Never	0	Inactive
65402	1	94	77.5	121	47	47	37	3.8	9	3.4	84	4.663	2.73	16.38	6	140	52	3.1	0.5	9.6	389	3.3	0	0.061	3612	2011-2012	112.6666667	72	0	0	0	0	0	0	1	0	0	<25	0	0	Male	20-39 years	Non-Hispanic White	Middle school or lower	Never Married	4	Current	21840	High activity
65431	2	100	92.7	77	34	22	22	4.5	9.8	4.3	115	6.384	8.58	51.48	6	164	73	1.2	0.2	4.8	181	37.1	0	0.04	3285.5	2011-2012	140.6666667	35.33333333	0	0	0	0	0	0	0	0	0	≥25	0	0	Male	60 and above years	Non-Hispanic Black	High School	Widowed/Divorced/Separated	2	Current	240	Low activity
65436	2	101	106.3	87	17	20	25	4.6	9.1	2.1	97	5.384	16.49	98.94	5	79	39	1.6	0.5	2.8	218	0.6	0	0.2215	2231	2011-2012	123.3333333	67.33333333	0	0	0	0	1	1	0	0	0	≥25	0	0	Male	20-39 years	Other Race-Including Multi-Racial	High School	Never Married	2	Never	1600	Low activity
65464	1	90	92.2	34	19	13	17	4.2	9.1	2.8	94	5.218	7.03	42.18	4.5	84	59	1.6	0.2	1.8	195	6.8	0	0.282	1674	2011-2012	120	74.66666667	0	0	0	0	0	0	0	0	0	≥25	0	0	Female	20-39 years	Non-Hispanic Black	High School	Married or living with a partner	3	Never	1440	Low activity
65473	2	95	80.8	144	24	20	28	4.4	10	3.6	107	5.94	5.91	35.46	5.5	83	67	2.2	0.4	3.5	237	10.8	0	0	1410.5	2011-2012	190	102.6666667	0	0	0	0	0	0	0	0	0	<25	0	0	Female	60 and above years	Non-Hispanic Black	Middle school or lower	Widowed/Divorced/Separated	1	Never	0	Inactive
65492	1	99	83	81	6	25	27	4.6	9.2	2.6	103	5.718	4.73	28.38	5.8	118	62	6.7	0.4	2	132	2.1	6.25	0	1070.5	2011-2012	118	68.66666667	0	0	0	0	0	0	0	0	0	<25	0	0	Female	60 and above years	Other Race-Including Multi-Racial	Middle school or lower	Married or living with a partner	1	Never	840	Low activity
65503	2	102	124.6	187	30	47	42	4.1	8.9	3.2	144	7.993	100.13	600.78	6.2	147	30	2.4	0.5	5.4	188	13.2	0	0.001	1947	2011-2012	126.6666667	72.66666667	1	1	0	1	1	1	0	0	1	≥25	1	1	Female	40-59 years	Mexican American	Middle school or lower	Married or living with a partner	1	Never	0	Inactive
65505	3	92	87	171	159	39	26	4.4	9.1	2.8	144	7.993	4.15	24.9	7.7	0	59	2	0.3	3	252	1.9	7	0.031	1834	2011-2012	106.6666667	60	1	0	0	0	1	1	0	0	0	<25	0	0	Male	40-59 years	Other Race-Including Multi-Racial	College or above	Married or living with a partner	4	Current	3600	High activity
65539	1	92	98.2	90	24	32	23	4.1	9.4	3.4	103	5.718	10.01	60.06	5.1	124	49	2.3	0.7	6.1	287	5.2	0	0.0935	2072	2011-2012	114.6666667	76.66666667	0	0	0	0	0	0	0	0	0	≥25	0	0	Male	20-39 years	Other Race-Including Multi-Racial	College or above	Never Married	4	Never	4800	High activity
65547	2	100	114.5	105	53	26	30	4.1	8.8	2.9	107	5.94	10.13	60.78	5.5	183	64	2.3	0.7	8	309	1	34.85	0.111	1365	2011-2012	114	64.66666667	0	0	0	1	1	1	0	1	0	≥25	1	0	Female	60 and above years	Non-Hispanic White	High School	Widowed/Divorced/Separated	1	Current	1200	Low activity
65548	2	98	127.4	183	52	27	21	3.9	9.1	2.7	117	6.495	16.87	101.22	5.3	136	42	1.8	0.4	3.7	261	9.3	0	0.3115	2464.5	2011-2012	111.3333333	78.66666667	0	0	0	1	1	1	0	0	1	≥25	1	1	Female	40-59 years	Non-Hispanic White	High School	Married or living with a partner	4	Never	0	Inactive
65565	1	91	100.5	121	22	30	21	4.5	9.6	1.9	94	5.218	17.65	105.9	5.4	112	50	1.8	0.5	5	208	7.8	0	0.141	1975	2011-2012	122.6666667	78.66666667	0	0	0	0	1	1	0	0	0	≥25	0	0	Male	20-39 years	Non-Hispanic White	High School	Married or living with a partner	3	Never	1600	Low activity
65571	1	93	94.2	92	14	44	40	4.2	8.8	3	132	7.327	26.28	157.68	6.6	0	58	1.6	0.4	2	176	1.5	0	NA	0	2011-2012	129.3333333	72.66666667	1	0	0	1	0	1	0	0	1	≥25	1	1	Female	60 and above years	Other Race-Including Multi-Racial	Middle school or lower	Widowed/Divorced/Separated	1	Never	840	Low activity
65575	2	94	81.8	88	29	29	29	4.8	9.8	3.5	95	5.273	4.65	27.9	5.9	68	75	3.1	0.5	2.3	238	3.7	0	0.0885	1662.5	2011-2012	118	74	0	0	0	0	0	0	0	0	0	<25	0	0	Male	20-39 years	Other Hispanic	Middle school or lower	Married or living with a partner	2	Never	6160	High activity
65590	2	93	96.5	75	11	10	17	4	8.9	3.1	90	4.996	10.02	60.12	5.7	119	64	2.3	0.5	5.7	405	11.7	0	0.321	3819.5	2011-2012	131.3333333	77.33333333	0	0	0	0	0	0	0	0	0	≥25	0	0	Female	40-59 years	Non-Hispanic Black	High School	Never Married	2	Never	13920	High activity
65594	1	99	80.7	249	45	14	24	4	9.7	3.4	110	6.106	7.35	44.1	6.1	0	81	2.8	0.7	3.2	310	55.7	0	0.081	1561	2011-2012	178	83.33333333	1	0	0	0	0	0	0	0	0	<25	0	1	Female	60 and above years	Non-Hispanic Black	High School	Widowed/Divorced/Separated	2	Current	800	Low activity
65625	3	91	126	208	263	145	82	4.2	8.9	3.1	243	13.489	38	228	9.1	0	44	2	0.5	5.1	287	10	0	0	2687.5	2011-2012	114	73.33333333	1	0	0	1	1	1	0	0	1	≥25	1	1	Male	20-39 years	Other Race-Including Multi-Racial	College or above	Never Married	1	Never	21840	High activity
65635	2	97	98.3	73	12	13	16	4	9.2	2.7	138	7.66	23.48	140.88	10.7	0	51	1.9	0.4	1.9	318	11.3	0	0.029	1776.5	2011-2012	89	69	1	0	0	0	0	0	0	0	0	≥25	0	0	Female	20-39 years	Non-Hispanic Black	High School	Never Married	1	Never	1200	Low activity
65637	1	99	97.7	78	8	10	19	3.8	8.7	3.5	96	5.329	6.08	36.48	4.9	113	56	1.4	0.5	6	188	36.1	0	0.021	2770.5	2011-2012	127.3333333	62.66666667	0	0	0	0	0	0	0	0	0	≥25	0	0	Male	60 and above years	Non-Hispanic Black	High School	Widowed/Divorced/Separated	3	Current	3840	High activity
65642	2	94	95.4	116	8	23	31	4	9.4	3.1	75	4.163	19.45	116.7	4.8	66	53	1.7	0.3	2.9	228	8.2	0	0.0015	1488.5	2011-2012	117.3333333	58.66666667	0	0	0	0	0	0	0	0	0	≥25	0	0	Female	40-59 years	Non-Hispanic White	College or above	Married or living with a partner	4	Never	240	Low activity
65660	1	97	145.6	179	13	18	17	3.9	9.8	2.9	92	5.107	27.75	166.5	5.8	0	51	2.7	0.4	3	249	32.2	0	0.0055	1559	2011-2012	126	73.33333333	0	1	0	1	1	1	0	0	1	≥25	1	1	Female	60 and above years	Non-Hispanic White	Middle school or lower	Widowed/Divorced/Separated	1	Current	0	Inactive
65688	2	91	88.5	115	28	36	45	4.8	10.1	2.5	98	5.44	9.69	58.14	5.6	138	65	1.7	0.4	3.9	180	4.8	0	0.072	1723.5	2011-2012	122.6666667	68	0	0	0	0	0	0	0	0	0	≥25	0	0	Female	40-59 years	Non-Hispanic White	High School	Married or living with a partner	4	Current	1920	Medium activity
65705	1	92	111.5	160	16	15	22	3.5	8	3	47	2.609	9.7	58.2	6.9	0	60	1.6	0.5	4.3	205	1200	0	NA	0	2011-2012	156	59	1	1	0	0	1	1	0	0	0	≥25	0	1	Female	60 and above years	Mexican American	Middle school or lower	Widowed/Divorced/Separated	1	Never	0	Inactive
65712	2	90	119.8	126	13	13	25	4	8.8	2.5	109	6.051	22.47	134.82	5.8	151	42	1.6	0.5	4.2	158	713.5	3.9	0.068	2546.5	2011-2012	104	49.33333333	0	1	1	1	1	1	0	0	1	≥25	1	0	Male	60 and above years	Other Hispanic	High School	Married or living with a partner	3	Current	0	Inactive
65741	2	102	98.8	162	95	65	32	4.5	9.6	2.9	98	5.44	10.16	60.96	4.8	121	35	2.9	0.6	5.9	250	1.2	24.2	0.043	2444	2011-2012	136	60	0	0	0	1	1	1	0	0	1	≥25	1	1	Male	20-39 years	Mexican American	Middle school or lower	Married or living with a partner	2	Former	5040	High activity
65745	2	103	102.1	102	13	30	23	4.4	9.6	2.5	95	5.273	11.57	69.42	5.3	98	40	2.4	0.5	2.8	237	1.7	0	0.0595	1407	2011-2012	111.3333333	73.33333333	0	0	0	0	0	0	0	0	0	≥25	0	0	Male	20-39 years	Non-Hispanic White	High School	Married or living with a partner	3	Current	9120	High activity
65751	2	94	100	293	33	31	31	5.1	9.5	2.6	123	6.828	5.1	30.6	7.4	0	41	2.3	0.5	3.5	258	3.1	4.1	0.133	2792	2011-2012	128.6666667	83.33333333	1	0	0	0	1	1	0	0	0	≥25	0	0	Male	40-59 years	Mexican American	High School	Married or living with a partner	1	Current	480	Low activity
65753	2	101	106.3	47	8	11	18	4	9.3	3.1	92	5.107	8.84	53.04	5.4	0	48	2.3	0.3	5.1	309	8.6	0	0.053	697	2011-2012	111.3333333	71.33333333	0	0	0	0	0	0	0	0	0	≥25	0	0	Female	20-39 years	Non-Hispanic White	High School	Married or living with a partner	1	Never	0	Inactive
65757	2	97	107.5	136	14	20	17	4.2	9	2.5	93	5.162	11.31	67.86	5.5	60	41	2.3	0.5	6.5	292	19.1	0	0.224	2482.5	2011-2012	116	85.33333333	0	0	0	0	1	1	0	0	0	≥25	0	1	Female	40-59 years	Non-Hispanic White	High School	Never Married	2	Current	3600	High activity
65781	1	93	88.6	171	29	14	19	4.3	9.6	3.6	130	7.216	19.13	114.78	7.5	261	39	2.7	0.7	5.7	372	5.5	0	0.01	1098	2011-2012	144	95.33333333	1	0	0	1	0	1	0	0	1	≥25	1	1	Female	40-59 years	Other Race-Including Multi-Racial	High School	Never Married	2	Never	960	Low activity
65782	1	97	106.6	100	14	22	23	3.9	9.2	3	115	6.384	30.82	184.92	5.2	115	38	2.2	0.4	2.2	185	20.6	0	0.1245	1909.5	2011-2012	141	77	0	1	0	1	1	1	0	0	1	≥25	1	1	Female	40-59 years	Non-Hispanic Black	High School	Married or living with a partner	4	Never	0	Inactive
65804	1	97	111	284	33	25	34	4.4	9.2	3	93	5.162	9.42	56.52	5.6	107	41	1.7	1.1	6.2	330	3.2	7	0.3	3232	2011-2012	140	78	0	0	0	1	1	1	0	0	1	≥25	1	1	Male	60 and above years	Non-Hispanic White	High School	Married or living with a partner	4	Current	4080	High activity
65808	2	100	87.8	57	39	39	26	4.1	9.1	3	105	5.829	5.35	32.1	6.2	102	67	1.4	0.4	1.5	183	14.4	0	0.0075	1273	2011-2012	124	70.66666667	0	0	0	0	0	0	0	0	0	≥25	0	0	Male	60 and above years	Non-Hispanic Black	High School	Married or living with a partner	3	Never	2400	Medium activity
65812	2	92	79.7	64	13	19	17	4.7	9.5	2.4	97	5.384	4.13	24.78	5.9	118	42	1.1	0.2	2.9	281	5.4	0	0	2669.5	2011-2012	118.6666667	83.33333333	0	0	0	0	0	0	0	0	0	<25	0	0	Male	20-39 years	Other Race-Including Multi-Racial	College or above	Married or living with a partner	2	Former	2880	Medium activity
65822	1	91	116.8	109	27	19	23	4	9	3	106	5.884	16.9	101.4	5.5	115	46	3.2	0.9	4.4	297	22.4	0	0.558	2708	2011-2012	124.6666667	69.33333333	0	0	0	1	1	1	0	0	1	≥25	1	0	Male	60 and above years	Non-Hispanic White	Middle school or lower	Widowed/Divorced/Separated	3	Current	1920	Medium activity
65854	3	90	89.6	72	16	15	17	4.3	9.4	2.6	100	5.551	8.56	51.36	5.6	74	50	2.3	0.4	2.9	197	80	0	0.0465	1264.5	2011-2012	135.3333333	73.33333333	0	0	0	0	0	0	0	0	0	<25	0	0	Male	40-59 years	Other Race-Including Multi-Racial	High School	Married or living with a partner	3	Never	7600	High activity
65879	3	92	87.6	105	9	12	17	4.2	9.2	3	96	5.329	16.64	99.84	5.2	79	36	2.3	0.4	3.4	244	18.3	0	0.0985	1437.5	2011-2012	104	69.33333333	0	0	0	0	0	0	0	0	0	≥25	0	0	Female	20-39 years	Mexican American	College or above	Married or living with a partner	4	Never	480	Low activity
65880	2	96	83.1	35	11	14	18	4.4	9.5	3.3	94	5.218	6.46	38.76	5.1	60	72	1.6	0.5	2.9	311	3.5	0	0.0755	3310	2011-2012	104	64.66666667	0	0	0	0	0	0	0	0	0	≥25	0	0	Female	20-39 years	Mexican American	High School	Never Married	2	Never	3360	Medium activity
65911	3	92	110.1	230	16	22	17	4.2	8.8	2.1	237	13.156	22.67	136.02	9.3	0	37	1	0.4	6.6	206	95	0	0.05	1642	2011-2012	141.3333333	54	1	1	0	1	1	1	0	0	1	≥25	1	1	Female	60 and above years	Non-Hispanic White	High School	Married or living with a partner	2	Current	0	Inactive
65923	2	91	79.9	81	15	16	27	4.2	9.1	2.7	86	4.774	4.58	27.48	5.4	78	56	1.6	0.6	2.8	223	14.4	0	0.0805	3614.5	2011-2012	98.66666667	65.33333333	0	0	0	0	0	0	0	0	0	<25	0	0	Male	60 and above years	Non-Hispanic White	College or above	Widowed/Divorced/Separated	4	Never	2160	Medium activity
65927	2	97	119.1	154	18	18	33	4.4	9.3	2.2	105	5.829	13.61	81.66	5.2	98	64	1.3	0.4	2.2	211	16.6	26.8	0.012	1602.5	2011-2012	124	74	0	0	0	1	1	1	0	1	0	≥25	1	0	Female	60 and above years	Non-Hispanic White	High School	Married or living with a partner	3	Never	120	Low activity
65951	1	99	107.7	116	16	23	22	4.2	10.3	2.6	99	5.495	14.32	85.92	5.5	123	44	2	0.4	5.3	240	2.3	0	0.103	1860.5	2011-2012	114.6666667	69.33333333	0	0	0	0	1	1	0	0	0	≥25	0	1	Female	40-59 years	Non-Hispanic White	College or above	Married or living with a partner	4	Never	0	Inactive
65991	3	91	78.8	86	12	14	16	4	9.1	2.7	87	4.829	9.81	58.86	4.8	83	59	1.6	0.4	3.4	207	8.6	60.85	0.241	3029.5	2011-2012	123.3333333	66	0	0	0	0	0	0	0	1	0	<25	0	0	Female	20-39 years	Non-Hispanic White	High School	Never Married	3	Current	3840	High activity
66000	2	92	89	68	83	44	33	4.4	10	2.8	86	4.774	9.35	56.1	5.8	103	84	1.8	0.4	3.3	289	1.9	0	0.228	1603	2011-2012	129.3333333	76.66666667	0	0	0	0	0	0	0	0	0	≥25	0	0	Female	40-59 years	Other Hispanic	College or above	Widowed/Divorced/Separated	4	Current	0	Inactive
66013	2	90	102.6	68	13	23	21	4	9.4	3.8	103	5.718	18.5	111	6	0	56	1.7	0.6	3.3	290	2.6	26.1	0.0925	2870.5	2011-2012	113.3333333	67.33333333	0	0	0	0	0	0	0	0	0	≥25	0	0	Male	20-39 years	Other Hispanic	Middle school or lower	Married or living with a partner	1	Never	10800	High activity
66015	2	96	92.3	196	16	11	23	4.2	9.3	3	106	5.884	14.58	87.48	5.7	140	36	1.5	0.6	4.4	315	2	0	0.024	2922	2011-2012	98	54	0	0	0	0	0	0	0	0	0	≥25	0	1	Male	60 and above years	Other Race-Including Multi-Racial	College or above	Married or living with a partner	3	Never	1200	Low activity
66036	1	94	87	151	13	23	30	4.3	9	2.5	96	5.329	4.05	24.3	5.6	167	66	2.4	0.5	2.5	278	1.6	0	0.3995	1181	2011-2012	108	63.33333333	0	0	0	0	0	0	0	0	0	<25	0	0	Female	60 and above years	Non-Hispanic White	High School	Married or living with a partner	3	Never	3120	Medium activity
66049	3	90	121.2	231	14	19	15	4.1	9.2	2.6	105	5.829	16.77	100.62	5.2	90	45	1.3	0.4	4	166	45	0	0.172	1224	2011-2012	143.3333333	70.66666667	0	0	0	1	1	1	0	0	1	≥25	1	1	Male	60 and above years	Other Hispanic	College or above	Married or living with a partner	3	Never	3360	Medium activity
66058	1	91	104	198	13	31	30	4.1	9.5	3.1	112	6.217	8.34	50.04	6.4	58	54	1.3	0.4	1.9	262	5.8	0	0.337	1533	2011-2012	123.3333333	64.66666667	0	0	0	0	1	1	0	0	0	≥25	0	1	Female	60 and above years	Non-Hispanic White	High School	Married or living with a partner	3	Current	0	Inactive
66068	1	103	84.7	158	28	15	24	4.4	10.7	3.3	138	7.66	9.73	58.38	8.9	0	56	2.2	0.7	6.4	220	310	0	0.016	1417	2011-2012	151	52	1	0	0	0	0	0	0	0	0	<25	0	1	Male	60 and above years	Other Race-Including Multi-Racial	High School	Married or living with a partner	1	Current	0	Inactive
66071	1	90	105.1	147	24	26	23	4.7	10.6	2.5	133	7.383	21.8	130.8	6.5	0	57	2.8	0.4	3.5	329	16.2	0	0.0715	1006	2011-2012	130.6666667	92.66666667	1	0	0	1	1	1	0	0	1	≥25	1	1	Female	60 and above years	Non-Hispanic Black	High School	Married or living with a partner	3	Current	120	Low activity
66079	2	101	110.9	87	37	22	24	4.3	9.7	3	107	5.94	16.33	97.98	5.8	119	36	1.4	0.2	3.3	173	63	0	0.005	1689.5	2011-2012	123.3333333	72.66666667	0	0	0	1	1	1	0	0	1	≥25	1	1	Male	40-59 years	Non-Hispanic Black	High School	Never Married	2	Former	0	Inactive
66094	2	101	78.7	71	20	10	18	4.5	9.2	2.6	98	5.44	5.27	31.62	5.2	84	52	1.3	0.3	2.3	195	3	0	0.0135	2078.5	2011-2012	109.3333333	56.66666667	0	0	0	0	0	0	0	0	0	<25	0	0	Male	20-39 years	Other Race-Including Multi-Racial	College or above	Never Married	3	Former	1960	Medium activity
66095	1	90	116.5	154	13	13	18	4.1	9	2.7	104	5.773	16.05	96.3	5.5	201	65	1.7	0.3	3	178	6.3	0	0.063	1414.5	2011-2012	114	59.33333333	1	1	0	1	1	1	0	0	1	≥25	1	0	Female	60 and above years	Non-Hispanic White	College or above	Married or living with a partner	3	Never	3120	Medium activity
66131	1	101	96.4	159	9	8	13	3.5	9.1	3.3	101	5.607	21.73	130.38	4.9	95	44	2.4	0.7	2.7	289	6.2	0	0.1665	1330.5	2011-2012	90	58.66666667	0	0	0	0	0	0	1	0	0	≥25	0	1	Female	20-39 years	Non-Hispanic White	High School	Married or living with a partner	1	Current	30720	High activity
66167	1	95	83.7	72	12	13	17	4.1	8.9	3.1	87	4.829	8.1	48.6	5.1	81	61	2	0.3	2.8	216	2.8	21.8	0.1045	2319.5	2011-2012	124	68.66666667	0	0	0	0	0	0	0	1	0	≥25	0	0	Female	20-39 years	Other Race-Including Multi-Racial	College or above	Married or living with a partner	1	Never	240	Low activity
66177	1	98	85.7	46	17	28	24	4	9.2	2.9	87	4.829	5.21	31.26	6	87	58	1.3	0.4	2.5	159	4.2	0	0.0165	3006.5	2011-2012	154.6666667	100.6666667	0	0	0	0	0	0	0	0	0	≥25	0	0	Male	40-59 years	Non-Hispanic Black	Middle school or lower	Never Married	2	Never	1440	Low activity
66191	1	92	100.5	126	23	28	23	4.1	9.5	2.6	102	5.662	27.67	166.02	5.9	146	51	0.7	1.4	1.5	173	22	0	5.00E-04	1881.5	2011-2012	116.6666667	86	0	0	0	1	0	1	0	0	1	≥25	1	0	Female	40-59 years	Non-Hispanic Black	Middle school or lower	Married or living with a partner	1	Never	0	Inactive
66194	1	97	85.5	77	12	22	27	4.2	9.8	3.2	112	6.217	8.78	52.68	5.4	123	77	1.8	0.3	1.2	125	14.7	3.9	0.0025	1341	2011-2012	106.6666667	76.66666667	0	1	1	0	0	0	0	0	0	≥25	0	0	Female	60 and above years	Non-Hispanic White	College or above	Married or living with a partner	4	Current	5880	High activity
66210	3	90	124.2	106	29	17	18	4.3	9.5	2.4	92	5.107	24.12	144.72	6.8	0	39	2	0.3	2.4	249	22.2	0	0.001	910.5	2011-2012	98.66666667	56.66666667	1	0	0	1	1	1	0	0	1	≥25	1	1	Female	60 and above years	Non-Hispanic Black	Middle school or lower	Married or living with a partner	1	Never	2040	Medium activity
66229	1	99	102.2	82	23	31	32	4.2	9.1	2.6	99	5.495	8.89	53.34	5.2	127	54	1.3	0.4	3.7	226	9.7	5.6	0.0045	2173.5	2011-2012	141.3333333	79.33333333	0	0	0	0	0	0	0	0	0	≥25	0	0	Male	60 and above years	Non-Hispanic White	College or above	Married or living with a partner	4	Current	1160	Low activity
66241	2	90	114	152	17	22	22	4.1	9.2	3.2	123	6.828	12.34	74.04	5.9	119	49	1.7	0.4	4.1	200	3.9	0	0.096	1861.5	2011-2012	126.6666667	79.33333333	0	0	0	1	1	1	0	0	1	≥25	1	1	Female	40-59 years	Other Hispanic	High School	Widowed/Divorced/Separated	2	Never	4800	High activity
66243	2	97	96.2	60	15	17	21	4.2	9.2	3.9	91	5.051	6.66	39.96	5.7	90	65	1.1	0.4	1.4	263	8	0	0.175	1360.5	2011-2012	109.3333333	74	0	0	0	0	0	0	0	0	0	≥25	0	0	Female	20-39 years	Non-Hispanic Black	High School	Married or living with a partner	4	Never	0	Inactive
66308	1	101	87	62	65	28	26	3.7	9.3	2.9	94	5.218	3.06	18.36	5.5	0	63	1.9	0.6	5.3	291	21.2	8.2	1.133	3346	2011-2012	117.3333333	79.33333333	0	0	0	0	0	0	0	0	0	<25	0	0	Male	40-59 years	Non-Hispanic White	High School	Widowed/Divorced/Separated	1	Current	23280	High activity
66311	2	103	92.4	95	14	15	18	3.9	9.4	3.5	133	7.383	6.18	37.08	6.8	0	42	1.7	0.4	4.1	347	325	0	0.1715	1282	2011-2012	95.33333333	64.66666667	1	0	0	0	0	0	0	0	0	<25	0	0	Male	20-39 years	Other Race-Including Multi-Racial	College or above	Married or living with a partner	4	Current	480	Low activity
66325	1	96	77	38	7	13	19	4.4	9.4	3.5	77	4.274	9.01	54.06	5.3	71	59	2.5	0.4	2.1	164	9.8	0	0.0705	2002.5	2011-2012	96.66666667	50	0	0	0	0	0	0	0	0	0	<25	0	0	Female	20-39 years	Non-Hispanic Black	High School	Married or living with a partner	3	Never	4800	High activity
66338	1	98	84.7	41	16	14	18	4.7	9.5	3	85	4.718	7.68	46.08	5	82	54	1.3	0.4	1.8	211	3.1	0	0.092	2447	2011-2012	109.3333333	76	0	0	0	0	0	0	0	0	0	<25	0	0	Female	20-39 years	Non-Hispanic White	High School	Married or living with a partner	3	Never	0	Inactive
66377	2	97	90.3	337	20	26	20	4	9.6	3	365	20.261	6.26	37.56	11.2	0	40	2	0.8	4.6	269	12.8	0	0.163	3174	2011-2012	119.3333333	80.66666667	1	0	0	0	0	0	0	0	0	<25	0	1	Male	40-59 years	Non-Hispanic White	Middle school or lower	Married or living with a partner	1	Never	0	Inactive
66391	3	91	79.5	113	16	17	17	4.3	9.2	3.3	100	5.551	6.52	39.12	5	127	48	2	0.6	3.9	271	2.3	0	0.0845	2094.5	2011-2012	117.3333333	52.66666667	0	0	0	0	0	0	0	0	0	<25	0	0	Female	20-39 years	Non-Hispanic White	College or above	Married or living with a partner	4	Never	600	Low activity
66393	1	92	84.2	55	10	20	24	3.8	9	2.6	101	5.607	4.13	24.78	5.5	92	65	1.6	0.3	1.7	298	22.2	0	0.0465	1995.5	2011-2012	142	90.66666667	0	0	0	0	0	0	0	0	0	<25	0	0	Female	40-59 years	Other Race-Including Multi-Racial	High School	Never Married	2	Current	7200	High activity
66396	2	102	128.1	171	47	26	27	4	9.1	2.7	200	11.102	34.4	206.4	9.1	0	34	3.6	0.5	3.6	321	28.5	0	0.036	1200.5	2011-2012	110.6666667	63.33333333	1	0	0	1	1	1	0	0	1	≥25	1	1	Female	40-59 years	Other Race-Including Multi-Racial	Middle school or lower	Never Married	1	Current	0	Inactive
66399	3	90	107.7	158	34	21	24	4.2	9.2	2.9	143	7.938	55.88	335.28	6	0	52	1.9	0.3	5.5	330	25	3.25	0.353	2271.5	2011-2012	124.6666667	79.33333333	1	0	0	1	1	1	0	0	1	≥25	1	1	Male	60 and above years	Non-Hispanic Black	College or above	Married or living with a partner	4	Current	1920	Medium activity
66409	1	95	89.5	110	10	15	22	4.2	9	2.7	96	5.329	5.33	31.98	5.7	81	55	1.4	0.4	3.5	138	7.3	0	0.58	1201	2011-2012	81.33333333	56.66666667	0	0	0	0	0	0	0	0	0	≥25	0	0	Female	20-39 years	Non-Hispanic White	High School	Married or living with a partner	2	Current	960	Low activity
66438	2	93	109.6	190	42	28	24	4.7	9.6	3.3	107	5.94	16.31	97.86	5.5	135	45	3.6	1.2	7.7	241	6.8	7	0.1265	1760	2011-2012	122	80	0	0	0	1	1	1	0	0	1	≥25	1	0	Male	40-59 years	Other Hispanic	High School	Widowed/Divorced/Separated	1	Never	1200	Low activity
66462	2	102	102.2	62	75	24	30	4.4	9.2	2.6	101	5.607	10.81	64.86	5.9	0	65	2.7	0.5	2.7	191	9.7	0	NA	0	2011-2012	150	89.33333333	0	0	0	0	1	1	0	0	0	≥25	0	0	Male	40-59 years	Non-Hispanic Black	High School	Widowed/Divorced/Separated	4	Never	0	Inactive
66464	2	103	100.4	251	23	21	26	4.5	9.6	2.9	97	5.384	36.1	216.6	5.1	121	32	2.8	0.5	3.5	143	6.6	0	0.0765	1696	2011-2012	114.6666667	73.33333333	0	0	0	1	1	1	0	0	1	≥25	1	0	Male	20-39 years	Mexican American	High School	Never Married	1	Never	560	Low activity
66497	2	96	93.9	60	8	14	20	4.3	9.2	3.1	96	5.329	9.4	56.4	5.5	101	47	1.4	0.4	2.2	308	3.4	5.5	0.0095	1352.5	2011-2012	106.6666667	59.33333333	0	0	0	0	0	0	0	0	0	≥25	0	0	Female	20-39 years	Non-Hispanic Black	Middle school or lower	Never Married	1	Never	960	Low activity
66507	2	94	110.5	100	14	34	29	4.4	9.4	3	92	5.107	9	54	5.6	114	45	1.6	0.7	4.2	157	37.6	0	0.236	1631	2011-2012	165.3333333	56.66666667	0	0	0	0	1	1	0	0	0	≥25	0	0	Male	60 and above years	Non-Hispanic White	High School	Widowed/Divorced/Separated	4	Never	10440	High activity
66525	1	101	106.6	155	79	34	31	4.6	8.8	2.3	93	5.162	26.23	157.38	5	93	36	1.7	0.6	7.8	153	2.8	0	0.18	4243.5	2011-2012	143.3333333	94	0	0	0	1	1	1	0	0	1	≥25	1	1	Male	40-59 years	Non-Hispanic White	High School	Widowed/Divorced/Separated	2	Never	7200	High activity
66542	2	96	124.5	82	106	36	38	4.3	10.1	3.3	180	9.992	11.32	67.92	8.9	0	46	2.1	0.3	2.2	264	1475	0	0.285	3345	2011-2012	167.3333333	70	1	0	0	1	1	1	0	0	1	≥25	1	1	Male	60 and above years	Non-Hispanic Black	High School	Married or living with a partner	3	Current	3840	High activity
66552	2	93	101.5	105	53	46	41	3.8	9.1	5.1	99	5.495	25.72	154.32	5.6	99	29	3.9	0.9	2.6	178	7.4	0	0.0585	2082.5	2011-2012	128	79.33333333	0	0	0	1	1	1	0	0	1	≥25	1	0	Male	40-59 years	Other Hispanic	High School	Married or living with a partner	3	Former	0	Inactive
66591	1	98	110.3	124	28	37	29	4.2	9.2	2.9	102	5.662	17.8	106.8	4.5	133	43	1.3	0.5	2.4	198	7.4	11.15	0.147	2022	2011-2012	121.3333333	87.33333333	0	0	0	1	1	1	0	0	1	≥25	1	0	Male	20-39 years	Non-Hispanic White	College or above	Married or living with a partner	3	Current	1080	Low activity
66594	2	98	115.5	146	60	45	26	4.1	9.2	3.2	155	8.604	65.78	394.68	6.8	288	37	2.5	0.5	4.4	236	32.5	0	0.249	2268	2011-2012	173.3333333	80.66666667	1	0	0	1	1	1	0	0	1	≥25	1	1	Male	60 and above years	Mexican American	High School	Widowed/Divorced/Separated	2	Current	0	Inactive
66620	1	92	99.1	69	19	19	22	4.6	9.9	2.7	100	5.551	8.79	52.74	5.6	78	83	1.7	0.5	3.7	256	3	40.55	0.2375	1568.5	2011-2012	142.6666667	98	0	0	0	0	0	0	0	1	0	≥25	0	0	Male	60 and above years	Non-Hispanic White	College or above	Married or living with a partner	4	Never	1080	Low activity
66653	2	97	95.7	243	32	21	19	4.4	9.2	2.6	96	5.329	8.28	49.68	5.5	70	55	2.4	0.5	3	215	13.6	16.75	0	1740	2011-2012	126.6666667	79.33333333	0	0	0	0	1	1	0	0	0	≥25	0	0	Male	40-59 years	Non-Hispanic White	Middle school or lower	Married or living with a partner	1	Current	4140	High activity
66663	2	97	89.9	127	21	27	30	4.2	9.5	2.8	101	5.607	7.05	42.3	5.3	119	59	1.3	0.5	5.8	243	5.6	0	0.212	2658	2011-2012	116	82	0	0	0	0	0	0	0	0	0	<25	0	0	Male	60 and above years	Other Race-Including Multi-Racial	College or above	Married or living with a partner	4	Never	540	Low activity
66701	2	92	113.6	124	28	37	38	4.3	9.1	2.7	125	6.939	19.63	117.78	6.5	191	35	2.2	0.7	4.9	157	19.5	0	0.166	2144	2011-2012	114	68	1	1	1	1	1	1	0	0	1	≥25	1	1	Male	60 and above years	Other Hispanic	Middle school or lower	Married or living with a partner	2	Never	1200	Low activity
66713	2	103	87.9	58	7	12	18	4.2	9.2	2.5	87	4.829	5.01	30.06	5.4	95	65	2.6	0.5	4	235	5	0.15	0.0395	1702.5	2011-2012	125.3333333	55.33333333	0	0	0	0	0	0	0	0	0	<25	0	0	Female	60 and above years	Non-Hispanic White	Middle school or lower	Married or living with a partner	2	Current	4320	High activity
66738	1	90	86.9	114	23	29	26	4.1	8.9	3	93	5.162	10.08	60.48	5.7	94	40	1.5	0.4	4.3	233	2.5	23.8	0.201	2482.5	2011-2012	116	74.66666667	0	0	0	0	0	0	0	0	0	<25	0	0	Male	60 and above years	Other Hispanic	College or above	Married or living with a partner	4	Current	8640	High activity
66743	2	93	94.3	146	11	15	22	4.1	9	3.7	109	6.051	7.27	43.62	6	193	50	2.1	0.6	4.2	269	10.1	3.2	0.1235	879.5	2011-2012	123.3333333	73.33333333	0	0	0	0	0	0	0	0	0	≥25	0	0	Female	60 and above years	Other Hispanic	Middle school or lower	Widowed/Divorced/Separated	1	Current	1020	Low activity
66763	2	91	90	66	15	19	21	3.8	9.1	2.7	202	11.213	24.93	149.58	7.4	0	56	1.5	0.4	4.4	171	4.1	0	0.175	1358	2011-2012	168.6666667	81.33333333	1	1	0	1	0	1	0	0	1	≥25	1	1	Female	60 and above years	Non-Hispanic White	High School	Married or living with a partner	2	Never	0	Inactive
66770	2	97	121	123	11	23	26	4.3	9	2.8	96	5.329	28.68	172.08	4.8	0	38	1.5	0.5	6.3	211	20.1	45.75	0.104	3955	2011-2012	100	90	0	0	0	1	1	1	0	1	0	≥25	1	1	Female	20-39 years	Non-Hispanic White	High School	Married or living with a partner	3	Never	12720	High activity
66777	2	93	139.2	388	22	32	19	4.3	10	3.3	172	9.548	61.93	371.58	7.5	313	29	2.9	1.3	10.1	322	18.8	0	0.068	1443	2011-2012	143.3333333	86	1	0	0	1	1	1	0	0	1	≥25	1	1	Male	20-39 years	Other Hispanic	Middle school or lower	Married or living with a partner	1	Current	0	Inactive
66785	2	102	72.2	98	24	24	30	4.1	9.2	3.5	89	4.94	3.34	20.04	5.7	231	66	1.9	0.4	3.6	224	1.6	0	NA	0	2011-2012	125.3333333	82.66666667	1	0	0	0	0	0	0	0	0	<25	0	0	Female	60 and above years	Other Race-Including Multi-Racial	Middle school or lower	Married or living with a partner	3	Never	840	Low activity
66789	1	97	88.8	71	23	15	19	3.9	8.7	3	88	4.885	5.96	35.76	4.8	103	78	1.2	0.3	3.5	137	4	0	5.00E-04	1523	2011-2012	103.3333333	66	0	0	0	0	0	0	0	0	0	≥25	0	0	Female	20-39 years	Non-Hispanic White	College or above	Married or living with a partner	1	Never	5040	High activity
66796	1	95	104.7	220	14	22	22	4.4	9.6	3.1	117	6.495	5.01	30.06	6.2	288	39	1.8	0.5	5.7	190	6.8	22.3	0.3185	1959.5	2011-2012	120.6666667	66.66666667	1	0	0	0	1	1	0	0	0	≥25	0	1	Male	60 and above years	Non-Hispanic White	High School	Married or living with a partner	3	Current	6240	High activity
66869	1	97	115.9	105	22	18	25	4.5	10.3	2.8	92	5.107	8.21	49.26	5	92	63	2.3	0.5	3.1	391	4.8	0	0.0495	827.5	2011-2012	120.6666667	72	0	0	0	0	1	1	0	0	0	≥25	0	0	Female	40-59 years	Non-Hispanic Black	College or above	Married or living with a partner	4	Never	0	Inactive
66896	2	101	95.1	59	16	10	15	4	9.5	3.7	102	5.662	13.06	78.36	6	111	62	3.1	0.6	1.4	248	8.8	0	0.1655	1106.5	2011-2012	146.6666667	73.33333333	0	0	0	0	0	0	0	0	0	≥25	0	0	Male	60 and above years	Non-Hispanic Black	Middle school or lower	Married or living with a partner	1	Never	0	Inactive
66905	2	96	68.8	46	8	15	19	4.7	9.5	2.8	83	4.607	8.96	53.76	5.2	83	72	2	0.5	2.2	213	5.1	11.2	0.062	1215	2011-2012	117.3333333	72	0	0	0	0	0	0	0	0	0	<25	0	0	Female	20-39 years	Other Race-Including Multi-Racial	College or above	Never Married	3	Never	120	Low activity
66914	2	92	76	55	15	15	18	4.6	9.6	2.7	100	5.551	3.89	23.34	4.7	109	85	1.2	0.3	1.3	279	0.9	0	0.11	3013	2011-2012	113.3333333	76	0	0	0	0	0	0	0	0	0	<25	0	0	Female	40-59 years	Other Race-Including Multi-Racial	High School	Married or living with a partner	4	Never	2160	Medium activity
66927	2	101	105.3	61	41	31	24	4.3	9.5	3.3	90	4.996	9.79	58.74	5.4	69	39	2.5	0.7	5.9	232	5.5	0	0.108	3073	2011-2012	130.6666667	43.33333333	0	0	0	0	1	1	0	0	0	≥25	0	1	Male	20-39 years	Other Hispanic	High School	Never Married	1	Current	2280	Medium activity
66938	1	97	84.6	135	12	19	20	4.2	9.7	3	80	4.441	6.35	38.1	5.4	85	57	2.1	0.5	2.2	161	2.9	0	0.0095	1949	2011-2012	120	56	0	0	0	0	0	0	0	0	0	≥25	0	0	Female	60 and above years	Other Race-Including Multi-Racial	Middle school or lower	Married or living with a partner	3	Never	0	Inactive
66943	1	101	101.5	278	44	23	22	4.6	9.7	2.3	98	5.44	9.89	59.34	5.2	103	36	3.6	0.6	4.4	225	11.3	0	0.1785	691.5	2011-2012	102	60.66666667	0	0	0	0	1	1	0	0	0	≥25	0	1	Female	40-59 years	Non-Hispanic White	Middle school or lower	Widowed/Divorced/Separated	1	Current	0	Inactive
66959	2	102	95	55	11	42	38	4.4	9.5	2.9	88	4.885	7.03	42.18	4.9	97	65	1.5	0.3	2.6	167	66	0	0.088	977.5	2011-2012	117.3333333	72.66666667	0	0	0	0	0	0	0	0	0	≥25	0	0	Female	40-59 years	Mexican American	Middle school or lower	Never Married	1	Never	1200	Low activity
67011	2	100	76	80	32	18	21	4.4	9.6	3.1	92	5.107	6.71	40.26	4.6	146	75	1.3	0.5	3.3	303	8.8	0	0.0075	1733.5	2011-2012	127.3333333	67.33333333	0	0	0	0	0	0	0	0	0	<25	0	0	Female	60 and above years	Non-Hispanic Black	Middle school or lower	Widowed/Divorced/Separated	1	Never	0	Inactive
67058	1	96	82	174	43	49	34	4.7	9.7	2.7	98	5.44	11.5	69	5.8	92	34	2.8	0.7	5.5	200	4.6	6.95	0.5605	1641.5	2011-2012	121.3333333	79.33333333	0	0	0	0	0	0	0	0	0	<25	0	0	Male	40-59 years	Non-Hispanic Black	High School	Married or living with a partner	4	Current	80	Low activity
67116	2	99	97.1	104	16	14	17	3.9	9	2.5	97	5.384	3.76	22.56	5.3	104	64	2	0.5	2.7	330	2.6	0	0.254	2713	2011-2012	106.6666667	78	0	0	0	0	0	0	0	0	0	≥25	0	0	Female	20-39 years	Mexican American	College or above	Never Married	4	Current	2000	Medium activity
67123	2	97	84.2	79	17	22	20	4	9.4	2.6	87	4.829	11.13	66.78	5.7	0	78	3.2	0.5	5	247	5.2	11.15	0	2482.5	2011-2012	106.6666667	64	0	0	0	0	0	0	0	0	0	≥25	0	0	Female	20-39 years	Non-Hispanic Black	High School	Never Married	2	Current	8640	High activity
67144	1	90	97.5	84	35	40	27	4.5	9.5	3.2	138	7.66	45.1	270.6	6.1	266	40	1.1	0.6	3.3	195	23	7	0.242	1235.5	2011-2012	119.3333333	82	1	0	0	1	0	1	0	0	1	<25	1	0	Male	40-59 years	Other Race-Including Multi-Racial	College or above	Married or living with a partner	4	Current	1160	Low activity
67189	2	103	91	198	19	21	22	4.5	9.8	2.4	93	5.162	13.44	80.64	7.8	0	70	1	0.3	1.7	184	4.7	0	0.1655	1169	2011-2012	167.3333333	80	1	0	0	0	0	0	0	0	0	≥25	0	1	Female	60 and above years	Other Race-Including Multi-Racial	High School	Widowed/Divorced/Separated	2	Never	7680	High activity
67190	1	101	104.8	70	44	12	15	3.5	8.5	2.5	95	5.273	3.64	21.84	6.2	0	48	0.7	0.3	3.7	207	8.3	0	0.004	972	2011-2012	128.6666667	67.33333333	0	0	0	0	1	1	0	0	0	≥25	0	1	Female	20-39 years	Non-Hispanic White	College or above	Married or living with a partner	4	Current	160	Low activity
67191	1	101	91.3	133	18	40	24	4.6	9.3	3.1	94	5.218	7.75	46.5	5.4	115	48	2.4	0.5	3.1	265	4.6	0	0.0805	1599.5	2011-2012	109.3333333	66.66666667	0	0	0	0	0	0	0	0	0	≥25	0	0	Female	20-39 years	Non-Hispanic White	Middle school or lower	Married or living with a partner	2	Current	1440	Low activity
67195	1	94	102	57	16	17	22	4.8	9.3	2.6	95	5.273	6.97	41.82	5	87	50	1.4	0.5	3.1	204	5.1	0	0.6705	2917.5	2011-2012	124.6666667	78	0	0	0	0	0	0	0	0	0	≥25	0	0	Male	40-59 years	Non-Hispanic White	High School	Married or living with a partner	3	Never	2800	Medium activity
67200	1	93	94.3	243	40	38	28	4.4	9.4	2.9	105	5.829	8.29	49.74	5	92	40	1.8	0.6	2.7	160	2.2	33.5	0.192	2391.5	2011-2012	114.6666667	67.33333333	0	0	0	0	1	1	0	1	0	≥25	0	0	Male	20-39 years	Non-Hispanic White	College or above	Never Married	4	Current	1620	Low activity
67226	3	90	97.1	36	21	17	16	4.2	9.2	2.7	236	13.1	5.14	30.84	9.9	0	80	1.8	0.3	2.2	252	5.9	0	NA	0	2011-2012	117.3333333	76	1	0	0	0	0	0	0	0	0	≥25	0	0	Female	40-59 years	Non-Hispanic Black	High School	Never Married	1	Never	80	Low activity
67229	2	91	133.3	103	23	23	22	4.3	9.4	2.5	114	6.328	23.17	139.02	5.8	0	59	2.3	0.6	3.2	186	3.5	0	0.3085	2195.5	2011-2012	112.6666667	65.33333333	1	1	0	1	1	1	0	0	1	≥25	1	0	Male	60 and above years	Non-Hispanic White	High School	Married or living with a partner	2	Current	0	Inactive
67230	1	97	78.2	197	106	111	115	4.8	9.6	2.8	98	5.44	2.86	17.16	6	178	76	2.1	0.8	3.9	285	3.9	35.1	0.091	1593	2011-2012	131.3333333	70.66666667	0	0	0	0	0	0	0	1	0	<25	0	0	Male	60 and above years	Non-Hispanic Black	College or above	Married or living with a partner	4	Current	360	Low activity
67259	2	100	111.5	227	35	106	75	4.8	10	2.9	114	6.328	28.23	169.38	5.5	159	40	1.7	0.6	2.9	238	4.3	0	0.3875	1412	2011-2012	122	90	0	0	0	1	1	1	0	0	1	≥25	1	1	Male	40-59 years	Non-Hispanic White	College or above	Married or living with a partner	4	Never	720	Low activity
67273	2	96	90	202	53	20	21	4.6	9.2	2.4	201	11.158	6.16	36.96	9.1	382	45	1.7	0.4	1.8	147	9.9	16.75	0.0495	1758	2011-2012	130	74.66666667	1	0	0	1	1	1	0	0	1	≥25	1	1	Male	40-59 years	Mexican American	Middle school or lower	Married or living with a partner	1	Current	0	Inactive
67279	2	90	76.5	46	33	29	27	4.4	9.5	2.6	99	5.495	10.8	64.8	5.2	85	55	1.9	0.4	6.9	295	19.3	0	0.0945	2565.5	2011-2012	95.33333333	60	0	0	0	0	0	0	0	0	0	<25	0	0	Female	20-39 years	Non-Hispanic Black	High School	Never Married	1	Current	0	Inactive
67283	1	96	95.9	108	12	17	18	4.2	9.2	2.8	103	5.718	21.62	129.72	5.8	143	40	1.4	0.3	2.2	196	7	0	0.01	1076	2011-2012	114	70	0	0	0	1	0	1	0	0	1	≥25	1	0	Female	40-59 years	Other Race-Including Multi-Racial	College or above	Married or living with a partner	4	Never	0	Inactive
67285	3	91	115.3	110	38	25	33	4	9.1	2.6	93	5.162	11.76	70.56	5.2	0	52	1.3	0.5	3.6	270	5.1	0	0.1125	965.5	2011-2012	153.3333333	86	0	0	0	1	1	1	0	0	1	≥25	1	0	Female	60 and above years	Other Hispanic	College or above	Widowed/Divorced/Separated	3	Never	0	Inactive
67293	2	91	83	60	17	22	39	4.9	9.7	2.3	93	5.162	4.5	27	5.1	111	74	1.4	0.6	2.3	172	1.3	7	0.186	1855	2011-2012	110.6666667	62	0	0	0	0	0	0	0	0	0	<25	0	0	Male	40-59 years	Non-Hispanic White	College or above	Married or living with a partner	4	Never	7320	High activity
67310	1	92	107.5	328	75	46	38	4.4	9.4	3.2	107	5.94	7.72	46.32	5.5	132	48	2.4	0.5	3.9	224	54	36.35	0.048	3980	2011-2012	162	81.33333333	0	0	0	1	1	1	0	1	0	≥25	1	1	Male	40-59 years	Other Hispanic	Middle school or lower	Married or living with a partner	2	Current	11520	High activity
67327	2	94	106.8	132	42	29	23	4.1	9.3	2.6	111	6.162	9.18	55.08	6.1	199	57	1.4	0.3	7.9	175	28.7	0	0.187	1137.5	2011-2012	124	59.33333333	0	0	0	1	1	1	0	0	1	≥25	1	1	Male	60 and above years	Non-Hispanic White	High School	Married or living with a partner	2	Never	1700	Low activity
67362	2	92	99.4	141	19	31	21	4.2	8.9	3.3	108	5.995	17.12	102.72	5.8	248	48	2	0.4	4.1	309	26	0	0.036	1338	2011-2012	152	106	1	0	0	1	0	1	0	0	1	≥25	1	1	Female	40-59 years	Other Race-Including Multi-Racial	Middle school or lower	Married or living with a partner	2	Never	1080	Low activity
67442	1	99	91.7	37	12	11	18	4.1	9.2	3	79	4.385	11.18	67.08	5.9	105	72	1.7	0.4	3.3	236	3.9	0	0.068	2805	2011-2012	121.3333333	68	0	0	0	0	0	0	0	0	0	≥25	0	0	Female	20-39 years	Non-Hispanic Black	College or above	Never Married	3	Never	5160	High activity
67454	2	92	90.7	176	11	29	27	4.7	9.9	2.6	106	5.884	8.75	52.5	5.8	230	78	1.5	0.6	5.2	319	9.1	4.25	0.111	2052.5	2011-2012	146	62.66666667	1	0	0	0	0	0	0	0	0	<25	0	1	Female	60 and above years	Non-Hispanic White	High School	Married or living with a partner	2	Never	3360	Medium activity
67455	1	101	100.2	187	19	16	19	4.5	9.6	2.8	107	5.94	25.65	153.9	5.6	94	39	2.2	0.6	3.9	133	8.5	0	0.8145	1911.5	2011-2012	120.6666667	74	0	0	0	1	1	1	0	0	1	≥25	1	0	Male	60 and above years	Non-Hispanic White	High School	Married or living with a partner	2	Current	0	Inactive
67463	1	95	113.8	144	39	105	49	4.5	9.4	2.4	102	5.662	35.4	212.4	5.2	85	33	1.7	0.4	3.2	181	10.3	20.9	0.1775	2376	2011-2012	139	72	0	0	0	1	1	1	0	0	1	≥25	1	1	Male	20-39 years	Non-Hispanic White	College or above	Married or living with a partner	4	Never	640	Low activity
67488	2	96	81.8	93	10	20	26	4.6	9.2	3.3	91	5.051	6.52	39.12	5.5	114	62	1	0.3	2.1	213	10.6	0	0.055	1936	2011-2012	114.6666667	72	0	0	0	0	0	0	0	0	0	<25	0	0	Male	20-39 years	Other Race-Including Multi-Racial	College or above	Never Married	3	Never	480	Low activity
67493	2	100	92.9	80	14	16	25	4.5	9.6	2.5	97	5.384	5.97	35.82	5.4	120	68	1.3	0.5	4	175	3.4	0	0.05	1562.5	2011-2012	122	70	0	0	1	0	0	0	0	0	0	<25	0	0	Male	60 and above years	Non-Hispanic Black	High School	Married or living with a partner	4	Current	560	Low activity
67494	1	94	91.8	126	23	30	24	4.8	9.9	1.5	103	5.718	13.93	83.58	6	105	55	3.4	0.4	8	271	8.3	0	0.533	3718	2011-2012	120.6666667	64	0	0	0	0	0	0	0	0	0	<25	0	0	Male	20-39 years	Non-Hispanic White	Middle school or lower	Widowed/Divorced/Separated	1	Current	16560	High activity
67632	1	102	83.1	78	43	24	25	3.9	9	3.5	87	4.829	10.14	60.84	5.3	117	57	1.9	0.5	3.4	274	1.3	5.3	0.2	2416.5	2011-2012	97.33333333	55.33333333	0	0	0	0	0	0	0	0	0	≥25	0	0	Female	40-59 years	Mexican American	Middle school or lower	Married or living with a partner	2	Never	0	Inactive
67643	2	95	103	50	15	20	29	4	9.4	2.9	116	6.439	22.08	132.48	5.8	164	62	1.7	0.4	2.4	160	11.9	0	0.2085	2935.5	2011-2012	124.6666667	66	0	1	1	1	0	1	0	0	1	≥25	1	1	Male	60 and above years	Non-Hispanic White	High School	Married or living with a partner	4	Current	1440	Low activity
67703	3	92	117.6	63	17	19	20	4.3	9.3	2.5	126	6.994	16.06	96.36	6.4	249	54	1.5	0.5	3.4	215	17.8	0	0.663	3929.5	2011-2012	144.6666667	61.33333333	1	1	0	1	1	1	0	0	1	≥25	1	1	Male	60 and above years	Mexican American	High School	Married or living with a partner	2	Current	17280	High activity
67718	1	101	115.3	101	24	18	18	4.3	9.4	2.8	108	5.995	21.85	131.1	5.3	128	55	2.1	0.7	4.6	314	10.2	0	0.402	1569	2011-2012	118.6666667	70.66666667	0	0	0	1	1	1	0	0	1	≥25	1	0	Female	40-59 years	Non-Hispanic White	High School	Widowed/Divorced/Separated	2	Current	4320	High activity
67719	3	90	82.3	104	18	29	37	3.9	9.6	3.6	39	2.165	9.34	56.04	9.9	0	69	2	0.8	2	253	1730	0	NA	0	2011-2012	133.3333333	75.33333333	1	0	0	0	0	0	0	0	0	<25	0	0	Male	20-39 years	Non-Hispanic Black	High School	Married or living with a partner	4	Current	15840	High activity
67727	1	101	94.3	123	19	22	17	4.3	9.2	2.4	98	5.44	9.68	58.08	4.9	103	40	2.3	0.6	5.2	312	3.5	0	0.078	1887.5	2011-2012	110	62	0	0	0	0	0	0	0	0	0	≥25	0	0	Female	20-39 years	Non-Hispanic White	High School	Married or living with a partner	2	Current	480	Low activity
67751	1	98	129.8	125	16	16	17	3.4	9	3.6	85	4.718	50.42	302.52	5.3	91	56	3.3	1.3	8.1	414	14	0	0.092	1734.5	2011-2012	96	74	0	0	0	1	1	1	0	0	1	≥25	1	0	Female	20-39 years	Non-Hispanic White	High School	Never Married	1	Never	23160	High activity
67764	2	90	108.7	91	87	18	25	3.8	9.3	3.2	57	3.164	8.49	50.94	13.2	0	47	1.5	0.7	9.4	216	2.3	0	NA	0	2011-2012	92	38	1	1	0	1	1	1	0	0	1	≥25	1	1	Male	60 and above years	Other Hispanic	Middle school or lower	Widowed/Divorced/Separated	2	Current	0	Inactive
67786	1	95	106.6	109	16	15	21	4.3	9.7	2.2	99	5.495	11.29	67.74	5.1	113	61	1.4	0.7	4.6	172	2	0	0.065	2680	2011-2012	103.3333333	56	0	0	0	0	0	0	0	0	0	≥25	0	0	Male	40-59 years	Non-Hispanic White	Middle school or lower	Never Married	2	Current	0	Inactive
67793	1	100	93.6	42	28	26	27	4.3	9.2	3.1	96	5.329	3.89	23.34	5.5	92	45	3	0.8	3.7	181	8.1	0	0.2285	2600.5	2011-2012	106	72	0	0	0	0	0	0	0	0	0	≥25	0	0	Male	20-39 years	Mexican American	High School	Married or living with a partner	2	Never	3420	Medium activity
67820	2	95	96.5	60	11	16	18	3.7	9.2	3.3	91	5.051	9.15	54.9	5.9	123	47	1.5	0.4	2.7	261	115	0	0	1803.5	2011-2012	122	67.33333333	0	0	0	0	0	0	0	0	0	≥25	0	1	Female	40-59 years	Non-Hispanic Black	College or above	Widowed/Divorced/Separated	2	Never	480	Low activity
67822	2	95	91.2	108	14	12	19	4.3	8.9	2.6	94	5.218	6.49	38.94	5.4	96	50	1.8	0.5	3.6	212	29.8	0	0.064	771.5	2011-2012	132	74	0	0	0	0	0	0	0	0	0	<25	0	0	Female	60 and above years	Non-Hispanic White	Middle school or lower	Married or living with a partner	1	Never	0	Inactive
67834	3	91	94	60	17	18	20	4.2	9.3	2.8	90	4.996	14.92	89.52	5.2	94	58	3	0.3	5.6	235	5.3	0	0.143	1972	2011-2012	100.6666667	72	0	0	0	0	0	0	0	0	0	≥25	0	0	Female	20-39 years	Non-Hispanic White	High School	Never Married	3	Current	1080	Low activity
67847	2	99	118.6	34	12	14	17	3.6	8.6	2.8	99	5.495	6.11	36.66	4.4	62	61	2.4	0.3	3.1	162	7.8	0	NA	0	2011-2012	116	54.66666667	0	1	0	0	1	1	0	0	0	≥25	0	0	Female	40-59 years	Non-Hispanic Black	High School	Married or living with a partner	1	Current	960	Low activity
67855	2	100	88	99	19	21	21	4.2	9.3	2.7	113	6.273	13.45	80.7	6.1	165	53	2.4	0.4	2.3	224	0.6	0	0.132	1678.5	2011-2012	140.6666667	79.33333333	0	0	0	0	0	0	0	0	0	≥25	0	0	Male	40-59 years	Other Race-Including Multi-Racial	College or above	Married or living with a partner	4	Current	3300	Medium activity
67863	1	91	88.2	144	30	40	39	4.5	9.2	2.9	96	5.329	4.03	24.18	5.4	62	81	1.6	0.5	3.1	199	6.8	74.25	0.101	2069	2011-2012	118.6666667	84	0	0	0	0	0	0	0	1	0	<25	0	0	Female	40-59 years	Non-Hispanic White	High School	Married or living with a partner	4	Current	5760	High activity
67889	1	101	98.2	85	12	14	23	4.5	9.3	2.6	90	4.996	11.14	66.84	5.1	74	60	2	0.3	2.1	227	3.8	3.6	0.262	1211	2011-2012	94.66666667	58.66666667	0	0	0	0	0	0	0	0	0	≥25	0	0	Female	40-59 years	Non-Hispanic White	College or above	Never Married	2	Current	2040	Medium activity
67891	1	93	73	52	14	16	20	3.8	8.8	3.1	94	5.218	9.07	54.42	5.4	96	59	2.7	0.5	2.7	359	3	6.25	0.1105	1666.5	2011-2012	105.3333333	63.33333333	0	0	0	0	0	0	0	0	0	<25	0	0	Female	20-39 years	Other Race-Including Multi-Racial	College or above	Never Married	4	Never	1920	Medium activity
67893	1	99	101.8	82	15	20	24	4.2	8.9	2.5	88	4.885	4.5	27	5.1	57	47	2.3	0.5	3.6	310	5.4	0	0.243	1935.5	2011-2012	122	82	0	0	0	0	0	0	0	0	0	≥25	0	0	Male	20-39 years	Non-Hispanic White	College or above	Never Married	4	Never	3360	Medium activity
67894	2	95	116	59	16	14	20	3.9	9.6	2.2	107	5.94	12.35	74.1	7.7	0	62	1.2	0.7	4.4	179	42	0	0	1262.5	2011-2012	110	56	1	1	0	1	1	1	0	0	1	≥25	1	1	Male	60 and above years	Other Race-Including Multi-Racial	Middle school or lower	Married or living with a partner	2	Current	3360	Medium activity
67912	2	102	110.2	241	25	31	36	4.1	9.8	4.1	104	5.773	26.82	160.92	5.9	133	31	1.7	0.5	4.4	157	7.8	6.5	0.192	1720.5	2011-2012	122.6666667	79.33333333	0	0	1	1	1	1	0	0	1	≥25	1	1	Male	60 and above years	Other Hispanic	College or above	Married or living with a partner	4	Current	0	Inactive
67917	1	103	93.3	100	17	36	29	4.7	9.6	1.9	94	5.218	9.48	56.88	5.4	94	59	1.5	0.5	4.2	229	12.3	16.15	0.189	2876.5	2011-2012	118.6666667	63.33333333	0	0	0	0	0	0	0	0	0	≥25	0	0	Male	20-39 years	Non-Hispanic White	High School	Never Married	3	Never	1800	Medium activity
67919	1	97	97.6	120	10	17	18	4.5	9.3	2.3	90	4.996	17.78	106.68	5.2	102	55	1.3	0.4	3.8	176	7.4	0.25	0.1005	1839.5	2011-2012	132	83.33333333	0	0	0	0	0	0	0	0	0	≥25	0	0	Female	60 and above years	Non-Hispanic White	High School	Widowed/Divorced/Separated	2	Current	0	Inactive
67925	3	90	117.7	150	48	29	22	4.3	9.6	2.6	116	6.439	30.67	184.02	6	183	69	1.7	0.2	3.5	246	2.3	0	0.007	1935	2011-2012	104	62	0	0	0	1	1	1	0	0	1	≥25	1	1	Female	40-59 years	Non-Hispanic Black	High School	Widowed/Divorced/Separated	3	Never	480	Low activity
67939	2	98	93.5	96	14	26	26	4.1	9.1	2.5	118	6.55	11.3	67.8	5.4	112	92	1.2	0.5	3.1	212	2.6	0	0.281	1524	2011-2012	108	64.66666667	0	0	0	0	0	0	0	0	0	<25	0	0	Male	60 and above years	Non-Hispanic White	Middle school or lower	Married or living with a partner	4	Current	4320	High activity
67952	2	90	102.3	189	117	26	35	3.6	9.4	4.6	118	6.55	22.88	137.28	6.4	0	39	2.7	0.3	8.2	364	70.7	0.3	0.1165	757.5	2011-2012	118.6666667	52	0	0	0	1	1	1	0	0	1	≥25	1	1	Female	60 and above years	Other Hispanic	Middle school or lower	Never Married	1	Current	1800	Medium activity
67962	2	95	94.2	76	10	14	16	4.4	9.6	2.6	91	5.051	5.96	35.76	5.2	150	63	2.7	0.5	3.5	228	26	0	0.08	1611.5	2011-2012	122.6666667	64.66666667	0	0	0	0	0	0	0	0	0	≥25	0	0	Female	40-59 years	Non-Hispanic Black	High School	Widowed/Divorced/Separated	3	Never	14280	High activity
67978	1	101	94.2	113	11	16	23	3.7	8.8	2.4	110	6.106	4.8	28.8	8.3	0	38	2.8	0.5	5.4	213	2.1	0	0.2845	1056.5	2011-2012	124	68.66666667	1	0	0	0	0	0	0	0	0	<25	0	1	Female	60 and above years	Non-Hispanic White	High School	Widowed/Divorced/Separated	1	Current	0	Inactive
68000	1	99	84.5	73	12	12	19	4.2	9.6	2.4	90	4.996	4.08	24.48	5.6	64	80	1.5	0.7	3.5	212	4.8	0	0.4335	1816	2011-2012	122.6666667	53.33333333	0	0	0	0	0	0	0	0	0	<25	0	0	Male	60 and above years	Non-Hispanic White	College or above	Married or living with a partner	3	Current	10800	High activity
68017	3	92	102.4	111	65	26	24	4.6	9.5	2.6	111	6.162	12.73	76.38	6	160	71	1.7	0.3	2.5	303	6.5	0	0.1375	1805	2011-2012	145.3333333	26.66666667	0	0	0	1	1	1	0	0	1	≥25	1	1	Female	60 and above years	Mexican American	High School	Married or living with a partner	4	Never	1200	Low activity
68022	3	92	105.8	160	69	87	89	4	9.1	2.8	103	5.718	31.9	191.4	5.4	116	27	2.1	0.5	3.1	176	21.2	0	0.286	2988	2011-2012	131.3333333	87.33333333	0	0	1	1	1	1	1	0	0	≥25	1	1	Male	40-59 years	Mexican American	High School	Married or living with a partner	4	Former	6480	High activity
68032	2	100	94.8	156	17	21	22	4.1	9.3	2.8	108	5.995	12.78	76.68	5.4	136	60	1.9	0.5	4	227	12.9	0	0.092	1830	2011-2012	117.3333333	60	0	0	0	0	1	1	0	0	0	≥25	0	0	Female	60 and above years	Non-Hispanic White	College or above	Married or living with a partner	2	Never	0	Inactive
68038	1	96	104.6	94	31	10	23	4	9.5	2.8	104	5.773	124.15	744.9	6.3	138	44	2.6	0.4	4	211	10.8	0	0.13	1179	2011-2012	130	78	0	0	0	1	1	1	0	0	1	≥25	1	0	Male	60 and above years	Non-Hispanic Black	High School	Widowed/Divorced/Separated	4	Former	0	Inactive
68061	2	102	78	72	6	13	17	4.5	9.4	2.8	96	5.329	8.83	52.98	5.5	81	71	1.7	0.3	3.4	234	3.9	0	0.001	1767.5	2011-2012	92.66666667	63.33333333	0	0	0	0	0	0	0	0	0	<25	0	0	Female	20-39 years	Other Race-Including Multi-Racial	College or above	Married or living with a partner	3	Never	4320	High activity
68063	1	101	74.6	87	20	19	19	4.1	9	2.6	97	5.384	2.86	17.16	5.3	0	66	2.2	0.8	3.5	265	2.2	28.1	1.044	2363	2011-2012	124	70	0	0	0	0	0	0	0	0	0	<25	0	0	Male	40-59 years	Non-Hispanic White	High School	Widowed/Divorced/Separated	1	Former	20400	High activity
68102	2	90	114.8	72	304	28	37	3.6	8.6	3.9	126	6.994	24.98	149.88	7.6	0	52	1.8	0.6	3.8	94	24.7	0	0.0345	968	2011-2012	139.3333333	64	1	1	1	1	1	1	0	0	1	≥25	1	1	Male	60 and above years	Other Hispanic	Middle school or lower	Married or living with a partner	1	Never	0	Inactive
68143	2	93	105.6	150	10	23	18	4.2	9.6	2.7	110	6.106	39.85	239.1	6.3	0	54	1.8	0.5	3.2	193	5.1	0	0.077	1637	2011-2012	129.3333333	67.33333333	0	1	0	1	0	1	0	0	1	≥25	1	1	Female	60 and above years	Other Hispanic	High School	Widowed/Divorced/Separated	2	Never	0	Inactive
68154	1	99	102.7	79	29	51	41	4	9	3.1	110	6.106	7.15	42.9	6	103	53	1.8	0.6	4	248	6.1	0	NA	0	2011-2012	122	66	0	0	0	0	1	1	1	0	0	≥25	0	0	Male	40-59 years	Non-Hispanic Black	High School	Married or living with a partner	4	Never	720	Low activity
68155	1	100	98.4	37	18	12	15	4.1	9.6	3.5	115	6.384	11.49	68.94	6.4	157	50	1.7	0.4	4.3	253	27	1.7	0.213	1810.5	2011-2012	140	97.33333333	0	0	0	0	0	0	0	0	0	≥25	0	1	Female	40-59 years	Non-Hispanic Black	College or above	Married or living with a partner	3	Never	600	Low activity
68169	1	92	90.4	70	20	21	19	3.9	9.5	3.1	90	4.996	32.6	195.6	5.3	84	38	2.2	0.6	6.9	198	33.8	6.05	0.071	1755.5	2011-2012	116	65.33333333	0	0	0	1	0	1	0	0	1	≥25	1	0	Female	20-39 years	Non-Hispanic White	High School	Married or living with a partner	2	Never	840	Low activity
68171	1	102	115	114	32	37	29	4	9.4	3.5	139	7.716	19.75	118.5	7.6	0	35	2.9	0.5	2.7	143	7.8	0	0.0415	918.5	2011-2012	110	79	1	1	0	1	1	1	0	0	1	≥25	1	1	Female	40-59 years	Mexican American	Middle school or lower	Widowed/Divorced/Separated	1	Never	3360	Medium activity
68173	1	95	103	512	23	32	21	4.3	9.5	2.5	100	5.551	24.27	145.62	5.4	87	29	2.3	0.9	7.7	220	5.9	0	0.1775	2340	2011-2012	113.3333333	70	0	0	0	1	1	1	0	0	1	≥25	1	1	Male	20-39 years	Non-Hispanic White	High School	Married or living with a partner	1	Current	7200	High activity
68180	1	90	76.3	64	33	20	22	4.6	9.5	3	100	5.551	5.65	33.9	5.8	85	47	3.1	0.8	4.2	218	5.4	19.3	0.01	2569	2011-2012	122	76	0	0	0	0	0	0	0	0	0	≥25	0	0	Male	20-39 years	Non-Hispanic Black	College or above	Married or living with a partner	3	Current	19520	High activity
68197	1	98	111.2	203	21	21	21	4.4	9.4	2.8	103	5.718	7.35	44.1	5.9	132	49	1.7	0.4	3.9	207	8.2	10.65	5.00E-04	2093	2011-2012	130.6666667	76	0	0	0	0	1	1	0	0	0	≥25	0	1	Male	60 and above years	Non-Hispanic White	High School	Married or living with a partner	4	Never	13440	High activity
68199	2	92	104.4	82	11	14	13	4.2	8.8	2.7	88	4.885	10.7	64.2	5.2	103	56	1.5	0.4	5.3	191	4.3	0	0.1305	1739.5	2011-2012	104.6666667	72.66666667	0	0	0	0	1	1	0	0	0	≥25	0	0	Female	20-39 years	Other Hispanic	College or above	Widowed/Divorced/Separated	3	Never	120	Low activity
68203	1	95	111.4	140	24	16	23	4.1	8.8	2.8	110	6.106	5.63	33.78	6.1	126	54	1.7	0.5	3.6	246	16.2	0	0.005	1877	2011-2012	141.3333333	52	0	1	0	0	1	1	0	0	0	≥25	0	1	Female	60 and above years	Other Race-Including Multi-Racial	High School	Married or living with a partner	2	Never	0	Inactive
68206	1	91	105.4	101	11	15	18	4	8.9	4.2	83	4.607	6.86	41.16	5.3	0	52	1.5	0.3	1.5	197	9.4	0	0.227	2520.5	2011-2012	109.3333333	66.66666667	0	0	0	0	1	1	0	0	0	≥25	0	0	Female	20-39 years	Other Race-Including Multi-Racial	College or above	Married or living with a partner	3	Never	320	Low activity
68227	2	101	98.2	79	24	20	20	3.9	9.5	3	93	5.162	8.49	50.94	5.5	158	69	1.8	0.3	3.8	259	4.5	0	0.0705	2831	2011-2012	129.3333333	84	0	0	0	0	1	1	0	0	0	≥25	0	0	Female	40-59 years	Non-Hispanic Black	High School	Widowed/Divorced/Separated	1	Never	0	Inactive
68249	1	94	104.3	70	11	17	21	4	9.4	2.7	109	6.051	10.53	63.18	5.5	82	48	0.9	0.3	2.5	225	4.3	7.95	0.2855	2445.5	2011-2012	112.6666667	72.66666667	0	0	0	0	0	0	0	0	0	≥25	0	0	Male	60 and above years	Non-Hispanic White	High School	Married or living with a partner	3	Never	8640	High activity
68273	1	99	100.9	85	22	20	24	4.5	9.4	2.5	94	5.218	4.92	29.52	5.2	65	49	1.5	0.5	4.3	152	13.7	0	0.4215	3098	2011-2012	117.3333333	76.66666667	0	0	0	0	0	0	0	0	0	≥25	0	0	Male	20-39 years	Non-Hispanic White	College or above	Married or living with a partner	1	Current	1560	Low activity
68275	1	99	106.1	86	19	32	22	4.6	9.8	3.2	127	7.05	20.18	121.08	5	0	53	1.6	0.4	2.9	261	18.2	0	0	1582.5	2011-2012	126	77.33333333	1	0	0	1	1	1	0	0	1	≥25	1	1	Male	60 and above years	Non-Hispanic Black	High School	Married or living with a partner	4	Never	0	Inactive
68314	2	103	111.5	112	33	38	27	4.7	9.6	4	99	5.495	12.69	76.14	5.9	79	54	3.1	0.5	4.2	346	5.4	0	0.072	2019	2011-2012	154.6666667	100	0	0	0	0	1	1	0	0	0	≥25	0	0	Male	20-39 years	Non-Hispanic Black	High School	Married or living with a partner	2	Never	1640	Low activity
68337	2	102	137.8	102	24	39	25	3.9	9.2	3.7	101	5.607	29.88	179.28	5.8	127	35	1.8	0.5	6	312	9.1	0	0.0955	1523	2011-2012	120	73.33333333	0	0	0	1	1	1	0	0	1	≥25	1	0	Male	20-39 years	Mexican American	High School	Married or living with a partner	3	Never	13920	High activity
68367	1	96	116.8	93	17	13	17	3.9	9.1	3.7	95	5.273	8.43	50.58	5.8	0	43	2.8	0.4	3.6	170	127.8	0	0.0125	1590.5	2011-2012	177.3333333	86	1	1	0	0	1	1	1	0	0	≥25	0	1	Male	60 and above years	Non-Hispanic Black	Middle school or lower	Married or living with a partner	3	Current	360	Low activity
68394	2	98	96.2	89	9	17	18	4.5	9.5	2.5	94	5.218	16.05	96.3	5.3	84	77	1	0.5	3	262	3.1	0	0.136	2484	2011-2012	123.3333333	74	0	0	0	0	0	0	0	0	0	≥25	0	0	Female	40-59 years	Non-Hispanic White	College or above	Never Married	4	Never	0	Inactive
68404	2	96	106.1	98	11	19	18	4.2	9.6	3.1	113	6.273	10.79	64.74	5.9	102	69	1.3	0.3	1.5	248	10.5	0	0.007	2225.5	2011-2012	116.6666667	70.66666667	0	0	0	0	1	1	0	0	0	≥25	0	0	Female	60 and above years	Non-Hispanic Black	High School	Never Married	2	Never	0	Inactive
68412	1	101	71.8	129	15	13	15	4.3	9.8	2.9	84	4.663	2.56	15.36	5.6	94	32	2.6	0.6	3.9	266	14.8	0	0.304	2532.5	2011-2012	115	66	0	0	0	0	0	0	0	0	0	<25	0	0	Male	20-39 years	Non-Hispanic White	Middle school or lower	Widowed/Divorced/Separated	1	Current	11040	High activity
68432	3	90	92.7	121	23	13	22	4.3	8.9	3.1	162	8.993	4.3	25.8	8.5	0	61	1.7	0.7	4	211	370	0	0.1005	1271.5	2011-2012	172	60	1	1	0	0	0	0	0	0	0	<25	0	0	Male	60 and above years	Other Hispanic	High School	Married or living with a partner	1	Current	4800	High activity
68447	1	95	130.5	149	32	43	48	4.1	9.5	3	125	6.939	24.8	148.8	6.1	201	60	1.4	0.3	3.1	230	44.1	0	0.1325	2638	2011-2012	143.3333333	68.66666667	1	1	0	1	1	1	0	0	1	≥25	1	1	Female	60 and above years	Non-Hispanic White	High School	Widowed/Divorced/Separated	1	Never	600	Low activity
68452	2	90	102.5	45	21	14	20	4	8.8	3.3	94	5.218	5.33	31.98	5.4	118	79	1.3	0.4	2.4	284	3.8	0	0.003	715.5	2011-2012	122	60	0	0	0	0	0	0	0	0	0	≥25	0	0	Female	60 and above years	Other Hispanic	Middle school or lower	Widowed/Divorced/Separated	2	Never	14400	High activity
68491	3	91	109.6	62	16	22	27	3.9	9	2.8	105	5.829	10.34	62.04	5.9	0	59	2.4	0.5	4.6	202	14.6	10.1	0.276	2186.5	2011-2012	134	68	0	0	0	0	0	0	0	0	0	≥25	0	0	Male	60 and above years	Non-Hispanic White	Middle school or lower	Married or living with a partner	3	Never	0	Inactive
68494	2	100	83.6	86	53	152	86	4.2	9.1	3.5	138	7.66	11.53	69.18	5.2	175	89	0.7	0	5.6	276	9.2	7	0.097	3183	2011-2012	110	61.33333333	1	0	0	1	0	1	1	0	0	<25	1	0	Female	20-39 years	Non-Hispanic White	High School	Widowed/Divorced/Separated	1	Current	5760	High activity
68495	2	96	114.9	209	54	24	27	5.2	9.7	1.8	130	7.216	31.65	189.9	6.8	0	46	1.1	0.7	4.9	259	27.3	0	0.184	1388.5	2011-2012	135.3333333	66	1	0	0	1	1	1	0	0	1	≥25	1	1	Female	60 and above years	Non-Hispanic White	High School	Widowed/Divorced/Separated	1	Never	0	Inactive
68502	2	99	99.2	95	19	19	28	4.9	9	2.8	84	4.663	11.25	67.5	4.7	128	43	2.7	0.6	3.5	350	16.2	0	0	989	2011-2012	124	66.66666667	0	0	0	0	0	0	0	0	0	≥25	0	0	Male	20-39 years	Non-Hispanic Black	College or above	Never Married	2	Never	320	Low activity
68506	1	101	119.8	160	18	26	35	4.1	9.3	2.8	110	6.106	47.77	286.62	6.2	207	42	1.9	0.5	4.4	177	1.8	0	0.0505	1067.5	2011-2012	98.66666667	57.33333333	1	1	1	1	1	1	0	0	1	≥25	1	1	Female	60 and above years	Non-Hispanic White	High School	Married or living with a partner	2	Current	0	Inactive
68513	1	95	81	58	11	19	26	4.5	9.6	2.7	95	5.273	4.73	28.38	5.4	138	58	1.7	0.6	3	216	14.9	0	0.2195	1178.5	2011-2012	126.6666667	79.33333333	0	0	0	0	0	0	0	0	0	<25	0	0	Female	60 and above years	Non-Hispanic White	High School	Married or living with a partner	2	Current	180	Low activity
68516	1	100	82.4	41	18	20	17	4.4	9.5	3	99	5.495	9.42	56.52	5.6	82	51	1.6	0.4	2.5	253	8.5	0	0	2260.5	2011-2012	122	54	0	0	0	0	0	0	0	0	0	≥25	0	0	Male	20-39 years	Non-Hispanic Black	College or above	Never Married	3	Never	1440	Low activity
68525	1	102	102	152	26	34	27	4.1	9	3.2	127	7.05	13.36	80.16	6.4	280	40	1.9	0.4	3.9	321	8.2	0	0	2666.5	2011-2012	159.3333333	78	1	0	0	1	1	1	0	0	1	≥25	1	1	Female	20-39 years	Mexican American	High School	Married or living with a partner	1	Never	1400	Low activity
68560	1	95	140.6	122	13	17	18	4.2	9.1	3.4	93	5.162	24.07	144.42	5.3	91	36	1.4	0.6	6.1	249	21.4	0	0.646	2631	2011-2012	130	81.33333333	0	0	0	1	1	1	0	0	1	≥25	1	1	Female	20-39 years	Mexican American	High School	Never Married	2	Former	14400	High activity
68570	2	98	87.2	70	32	23	22	4.3	9.3	2.9	124	6.883	4.33	25.98	5.1	0	62	2.6	0.6	3.6	232	9.1	28.1	0.433	2493	2011-2012	113.3333333	72	0	0	0	0	0	0	0	0	0	<25	0	0	Male	40-59 years	Non-Hispanic White	High School	Widowed/Divorced/Separated	2	Current	1920	Medium activity
68572	2	93	98.8	234	21	20	23	4.8	9.6	2.5	100	5.551	7.6	45.6	5.2	130	54	1.3	0.5	3.4	224	6.4	105.4	0.375	3646	2011-2012	114	64	0	0	0	0	1	1	0	1	0	≥25	0	0	Male	40-59 years	Non-Hispanic White	College or above	Married or living with a partner	3	Current	3840	High activity
68573	3	91	84.9	140	10	24	28	4.3	9.3	3.4	90	4.996	3.38	20.28	5.4	73	56	2.5	0.7	2.7	256	7.8	6.25	0.083	2028	2011-2012	120	78.66666667	0	0	0	0	0	0	0	0	0	<25	0	0	Male	60 and above years	Other Race-Including Multi-Racial	Middle school or lower	Married or living with a partner	3	Current	8400	High activity
68574	2	98	88.9	86	11	19	30	4.5	9.3	3.1	99	5.495	7.72	46.32	4.9	90	58	1.9	0.3	3.2	242	16.5	0	0.086	2363.5	2011-2012	114	70.66666667	0	0	0	0	0	0	0	0	0	<25	0	0	Male	20-39 years	Mexican American	High School	Never Married	2	Never	4800	High activity
68591	1	99	110.8	96	24	22	22	4.1	9.2	4.1	124	6.883	23.05	138.3	6.9	0	38	1.8	0.5	2	232	5.7	0	0.0735	2564	2011-2012	142	70	1	0	0	1	1	1	0	0	1	≥25	1	1	Male	60 and above years	Non-Hispanic Black	College or above	Married or living with a partner	4	Never	120	Low activity
68594	1	95	103.2	125	15	20	20	3.9	9	2.8	95	5.273	15.16	90.96	6.3	0	39	1.3	0.9	5.9	182	9.8	0	0.0075	2298	2011-2012	131.3333333	64.66666667	1	1	0	1	0	1	0	0	1	≥25	1	1	Male	60 and above years	Non-Hispanic White	High School	Widowed/Divorced/Separated	1	Never	1680	Low activity
68601	1	95	84.2	322	93	64	32	4.3	9.1	2.8	95	5.273	12.52	75.12	5.4	113	39	2.1	0.7	3.9	244	2.8	19.45	0.1405	2225.5	2011-2012	116	72.66666667	0	0	0	1	1	1	0	0	1	<25	1	0	Male	20-39 years	Other Race-Including Multi-Racial	High School	Married or living with a partner	1	Never	7200	High activity
68602	2	96	95.7	106	24	30	19	4.6	9.5	2.9	110	6.106	14.16	84.96	5.1	93	36	1.7	0.3	2.8	196	2.9	7.45	0.0495	1225	2011-2012	110.6666667	64	0	0	0	1	0	1	0	0	1	≥25	1	0	Male	20-39 years	Mexican American	Middle school or lower	Married or living with a partner	2	Never	1680	Low activity
68645	2	93	107.4	114	57	17	23	4.2	10.3	3.5	107	5.94	18.05	108.3	5.8	268	51	2.1	0.6	3.5	203	84.4	0	0	805.5	2011-2012	114	62	1	0	0	1	1	1	0	0	1	≥25	1	1	Female	60 and above years	Non-Hispanic White	College or above	Widowed/Divorced/Separated	3	Never	840	Low activity
68646	1	97	74.7	29	15	16	26	4	9	2.5	88	4.885	3.24	19.44	4.9	90	75	1.7	0.3	2.6	156	7	0	NA	0	2011-2012	100.6666667	58	0	0	0	0	0	0	0	0	0	<25	0	0	Female	40-59 years	Mexican American	Middle school or lower	Widowed/Divorced/Separated	1	Never	480	Low activity
68675	1	100	81.3	66	18	17	23	3.8	8.6	2.5	90	4.996	5.77	34.62	5.4	87	82	1.8	0.4	5.2	196	1.2	0	0.131	1281.5	2011-2012	134	82.66666667	0	0	0	0	0	0	0	0	0	<25	0	0	Female	60 and above years	Other Race-Including Multi-Racial	College or above	Married or living with a partner	4	Never	4800	High activity
68682	2	101	100	551	26	19	27	4.4	9.2	2.5	147	8.16	15.5	93	6.5	0	34	1.7	0.6	4.9	144	261.5	0	0.0435	1048	2011-2012	155.3333333	62.66666667	1	1	1	1	1	1	0	0	1	≥25	1	1	Female	60 and above years	Non-Hispanic White	Middle school or lower	Married or living with a partner	2	Never	0	Inactive
68689	2	92	98.3	88	20	21	25	4.4	9.5	4.2	191	10.602	19.12	114.72	8.9	0	43	2.4	0.5	2.9	304	29.2	0	0.181	1271.5	2011-2012	154	64	1	0	0	1	1	1	0	0	1	≥25	1	1	Female	60 and above years	Other Hispanic	Middle school or lower	Married or living with a partner	2	Never	1200	Low activity
68694	2	90	102.6	69	24	26	29	4	9.1	3	116	6.439	21.3	127.8	5.9	129	43	1.7	0.4	1.6	223	9.7	9.05	0.0055	2008.5	2011-2012	120	72	0	0	0	0	0	0	0	0	0	≥25	0	1	Male	40-59 years	Non-Hispanic Black	College or above	Married or living with a partner	4	Current	300	Low activity
68706	1	100	76	99	26	50	46	4.8	9.7	2.7	95	5.273	6.98	41.88	4.4	87	58	3.5	1.1	4.2	235	25	0	0.115	2569.5	2011-2012	101.3333333	67.33333333	0	0	0	0	0	0	0	0	0	<25	0	0	Male	20-39 years	Non-Hispanic Black	High School	Married or living with a partner	1	Current	11640	High activity
68714	1	96	75.7	30	16	33	22	4.3	9.1	2.9	93	5.162	6.88	41.28	6.1	75	79	2.1	0.5	2.3	246	2.5	0	0.005	2260	2011-2012	104	64	0	0	0	0	0	0	0	0	0	<25	0	0	Female	40-59 years	Non-Hispanic Black	High School	Never Married	4	Current	7200	High activity
68717	2	99	116.8	155	18	16	27	4.1	8.8	3.5	154	8.549	17.47	104.82	6.6	0	48	2.2	0.3	2.5	153	27.8	0	NA	0	2011-2012	138.6666667	71.33333333	1	1	1	1	1	1	0	0	1	≥25	1	1	Male	60 and above years	Non-Hispanic Black	Middle school or lower	Widowed/Divorced/Separated	4	Current	0	Inactive
68720	1	98	88.4	129	20	16	17	4.5	9.6	2.4	103	5.718	8.98	53.88	5.8	105	50	1.2	0.4	2.9	183	1.5	9.3	0.0615	1360.5	2011-2012	123.3333333	78.66666667	0	0	0	0	0	0	0	0	0	<25	0	0	Female	40-59 years	Non-Hispanic White	High School	Married or living with a partner	2	Current	0	Inactive
68762	1	102	80.3	119	696	78	110	4	9.3	3.1	92	5.107	9.75	58.5	5.5	0	95	2.9	0.9	4	181	26.8	15.1	0	931	2011-2012	102.6666667	75.33333333	0	0	0	1	1	1	0	0	1	<25	0	0	Female	20-39 years	Non-Hispanic White	High School	Widowed/Divorced/Separated	3	Current	1920	Medium activity
68771	1	98	83.4	53	16	22	20	4.5	9.6	2.9	93	5.162	10.89	65.34	5	91	46	1.8	0.3	4	232	6.6	0	0.141	1934.5	2011-2012	115.3333333	78	0	0	0	0	0	0	0	0	0	<25	0	0	Female	20-39 years	Other Race-Including Multi-Racial	High School	Married or living with a partner	4	Current	13768	High activity
68808	2	99	93.4	373	192	59	46	4.2	9	3.1	91	5.051	6.01	36.06	5.1	108	49	1.9	0.3	1.2	149	7.8	25.6	0.067	2424	2011-2012	122.6666667	74.66666667	0	0	0	0	1	1	0	0	0	<25	0	0	Male	40-59 years	Non-Hispanic Black	High School	Widowed/Divorced/Separated	1	Current	280	Low activity
68825	1	92	77.2	50	30	13	24	4.3	9.3	2.3	101	5.607	2.87	17.22	5.7	103	66	2.9	0.8	3.3	350	6.4	0	NA	0	2011-2012	122	72.66666667	0	0	0	0	0	0	0	0	0	<25	0	0	Male	40-59 years	Other Race-Including Multi-Racial	Middle school or lower	Widowed/Divorced/Separated	1	Current	15720	High activity
68837	1	99	76.7	23	17	21	29	4.1	8.9	3	86	4.774	4.7	28.2	5.4	60	58	1.8	0.3	1.5	217	4.6	0	0.0525	2388	2011-2012	100	79	0	0	0	0	0	0	0	0	0	<25	0	0	Female	20-39 years	Non-Hispanic Black	College or above	Widowed/Divorced/Separated	2	Never	1440	Low activity
68847	2	102	116.7	167	23	17	22	3.9	9.3	2.9	100	5.551	30.1	180.6	5.6	105	37	2.6	0.7	4.1	313	4	0	0.1215	1572	2011-2012	107.3333333	50	0	0	0	1	1	1	0	0	1	≥25	1	1	Male	20-39 years	Mexican American	High School	Never Married	3	Never	240	Low activity
68855	1	95	101.5	118	49	19	26	3.8	9.1	2.7	98	5.44	6.62	39.72	5.2	113	53	1.1	0.3	4.4	245	3.4	36.4	0.47	2673.5	2011-2012	96.66666667	59.33333333	0	0	0	0	1	1	0	1	0	≥25	0	0	Male	60 and above years	Non-Hispanic White	High School	Married or living with a partner	2	Current	1440	Low activity
68864	2	91	112.3	172	36	17	15	4.2	9.7	2.7	133	7.383	15.09	90.54	7.1	0	66	1.4	0.3	6.7	262	16.6	0.7	0.053	1536.5	2011-2012	136.6666667	68.66666667	1	0	0	1	1	1	0	0	1	≥25	1	1	Female	40-59 years	Other Hispanic	Middle school or lower	Married or living with a partner	1	Current	0	Inactive
68874	2	91	100.6	216	22	32	18	4.4	9.7	2.6	115	6.384	12.57	75.42	6.2	149	40	1.6	0.4	1.4	187	7.3	0	0.426	1444	2011-2012	138	86	0	0	0	0	1	1	0	0	0	≥25	0	1	Male	40-59 years	Other Hispanic	High School	Widowed/Divorced/Separated	4	Current	0	Inactive
68916	3	92	90.2	91	36	21	22	5	9.8	3.3	92	5.107	6.28	37.68	5.6	105	56	2.6	0.5	4.9	301	7.2	0	NA	0	2011-2012	132	72.66666667	0	0	0	0	0	0	0	0	0	<25	0	0	Male	40-59 years	Mexican American	Middle school or lower	Married or living with a partner	2	Never	4560	High activity
68935	1	100	80.6	225	64	42	38	4.2	9.4	2.8	113	6.273	7.88	47.28	5.9	88	41	1.6	1	7.3	180	4.7	0	0.2435	2581.5	2011-2012	111.3333333	66.66666667	0	0	0	0	0	0	0	0	0	≥25	0	0	Male	40-59 years	Mexican American	High School	Married or living with a partner	2	Current	10260	High activity
68937	2	95	77.5	58	15	10	20	4.7	9.5	2.9	106	5.884	4.09	24.54	5	103	59	1.9	0.3	3.7	141	14.5	0	0.045	2450.5	2011-2012	132.6666667	78.66666667	0	0	0	0	0	0	0	0	0	<25	0	0	Male	20-39 years	Non-Hispanic Black	High School	Never Married	3	Never	3600	High activity
68952	2	91	86.8	88	25	16	21	4.1	9.6	2.6	102	5.662	7.14	42.84	5.7	171	98	1.1	0.5	3.7	180	15.7	0	0.249	1724	2011-2012	162	68.66666667	0	0	0	0	0	0	0	0	0	<25	0	0	Female	60 and above years	Non-Hispanic White	College or above	Widowed/Divorced/Separated	3	Never	2880	Medium activity
68972	1	90	106	211	13	21	25	3.7	9	3.7	113	6.273	18.1	108.6	6.4	131	44	2.2	0.8	3.7	294	4.1	0	0.084	1897.5	2011-2012	142	92	0	0	0	1	1	1	0	0	1	≥25	1	1	Female	60 and above years	Other Hispanic	Middle school or lower	Married or living with a partner	2	Never	3360	Medium activity
68983	1	102	100	98	20	15	25	4.5	9.7	2.7	97	5.384	13.07	78.42	4.8	104	58	1.4	0.6	2.8	276	9.8	5.7	0.3875	1821	2011-2012	116.6666667	74.66666667	0	0	0	0	0	0	0	0	0	<25	0	0	Male	60 and above years	Other Hispanic	College or above	Widowed/Divorced/Separated	3	Current	3420	Medium activity
68992	2	99	114.2	574	361	32	27	3.9	9.2	3	112	6.217	10.47	62.82	9.2	0	77	5.2	0.7	4.6	369	76.9	28.1	0.043	3432	2011-2012	135	74	1	0	0	1	1	1	0	1	0	≥25	1	1	Female	40-59 years	Non-Hispanic Black	High School	Married or living with a partner	1	Current	240	Low activity
69014	1	91	130	312	10	30	24	4.3	9.2	2.5	165	9.159	10.91	65.46	6.8	0	29	2	0.5	5.4	131	33.2	0	0.1835	1456.5	2011-2012	120	51.33333333	1	1	0	1	1	1	0	0	1	≥25	1	1	Male	60 and above years	Non-Hispanic White	High School	Married or living with a partner	4	Current	232	Low activity
69027	2	91	99	91	20	21	25	4.7	9.3	2.4	77	4.274	5.73	34.38	5.2	87	57	1.6	0.6	5.1	205	12.2	4.7	0.1945	1931	2011-2012	130	95	0	0	0	0	0	0	0	0	0	≥25	0	0	Male	20-39 years	Non-Hispanic White	High School	Married or living with a partner	4	Never	960	Low activity
69047	1	99	115.3	157	27	24	23	4.2	9.5	2.7	100	5.551	13.85	83.1	5.7	207	55	2.3	0.3	3.2	273	20	0	0.2475	1838	2011-2012	116.6666667	83.33333333	1	0	0	1	1	1	0	0	1	≥25	1	1	Female	60 and above years	Non-Hispanic White	College or above	Married or living with a partner	4	Never	1440	Low activity
69055	2	96	74.1	205	8	17	21	4.6	9.5	2.6	90	4.996	3.64	21.84	5.2	81	62	2	0.4	3.8	212	2.8	24.5	0.058	2115.5	2011-2012	106	65	0	0	0	0	0	0	0	1	0	<25	0	0	Female	20-39 years	Other Hispanic	High School	Married or living with a partner	3	Never	240	Low activity
69105	2	102	91.9	147	24	28	22	4.1	9	2.8	87	4.829	5.09	30.54	5.7	74	42	2	0.4	3	224	2.1	0	0.0725	1980	2011-2012	118.6666667	80	0	0	0	0	0	0	0	0	0	≥25	0	0	Male	40-59 years	Other Hispanic	Middle school or lower	Never Married	1	Never	3360	Medium activity
69107	2	100	103.7	48	33	25	29	4.7	9.2	3.2	126	6.994	13.5	81	5	0	98	1.6	0.6	4.3	251	10.2	0	NA	0	2011-2012	157.3333333	81.33333333	1	0	0	0	0	0	0	0	0	≥25	0	1	Male	60 and above years	Non-Hispanic Black	High School	Widowed/Divorced/Separated	1	Current	9600	High activity
69152	2	97	73.9	97	15	29	32	4.7	9.7	3	102	5.662	5.08	30.48	3.7	0	48	1.8	0.3	2.3	173	5.1	32.5	0.011	3351	2011-2012	99.33333333	70	0	0	0	0	0	0	0	1	0	<25	0	0	Male	20-39 years	Non-Hispanic Black	High School	Never Married	1	Former	11220	High activity
69161	1	102	75.8	113	15	14	15	4.8	10	3	83	4.607	6.55	39.3	5.5	91	46	2.1	0.5	4.8	236	12.1	30.35	0.19	3378.5	2011-2012	121.3333333	77.33333333	0	0	0	0	0	0	0	1	0	<25	0	0	Male	20-39 years	Non-Hispanic White	Middle school or lower	Married or living with a partner	1	Current	30480	High activity
69171	2	93	89.3	154	62	20	18	4.3	9.1	2.2	97	5.384	10.54	63.24	5	106	53	1.8	0.3	2.7	252	3.9	0	0.2035	3694	2011-2012	116.6666667	73.33333333	0	0	0	0	1	1	0	0	0	≥25	0	0	Female	40-59 years	Other Hispanic	High School	Never Married	3	Never	0	Inactive
69176	2	102	111	36	12	18	18	3.9	9.2	4.2	100	5.551	12.15	72.9	6	111	51	2.5	0.4	2.7	264	6.5	0	0.123	1623.5	2011-2012	136	92.66666667	0	0	0	0	0	0	0	0	0	≥25	0	0	Female	40-59 years	Non-Hispanic Black	High School	Married or living with a partner	2	Never	0	Inactive
69201	2	94	97.4	339	29	20	17	4.3	9.3	3.1	112	6.217	19.08	114.48	5.6	124	40	2.3	0.3	6.8	365	9.7	7.8	0.163	1375	2011-2012	126	85.33333333	0	0	0	1	1	1	0	0	1	≥25	1	1	Female	40-59 years	Other Race-Including Multi-Racial	College or above	Married or living with a partner	4	Never	1200	Low activity
69205	2	92	101.4	218	39	25	29	4.2	9.5	4.1	144	7.993	22.65	135.9	7.9	339	48	1.9	0.5	5.6	280	1.4	0	NA	0	2011-2012	154.6666667	98	1	0	0	1	1	1	0	0	1	≥25	1	1	Female	40-59 years	Other Race-Including Multi-Racial	High School	Married or living with a partner	2	Never	5480	High activity
69236	2	97	105.1	205	31	38	28	4.6	9.2	2.7	92	5.107	23.2	139.2	5.5	46	32	2.2	0.5	2.5	220	3.5	0	0.4955	2862	2011-2012	129.3333333	78.66666667	0	0	0	1	1	1	0	0	1	≥25	1	1	Male	20-39 years	Non-Hispanic White	High School	Married or living with a partner	2	Current	19280	High activity
69237	1	97	95.7	139	13	36	24	3.8	8.7	3.1	89	4.94	12.15	72.9	5.4	117	51	1.7	0.5	3	333	4	0	0.007	1777	2011-2012	120.6666667	29.33333333	0	0	0	0	1	1	0	0	0	≥25	0	0	Female	40-59 years	Other Hispanic	College or above	Married or living with a partner	4	Never	1380	Low activity
69245	1	103	97.6	141	14	15	25	3.6	9.2	3.7	77	4.274	36.35	218.1	5.4	0	42	2.1	0.6	1.6	275	15.4	0	0.1465	2081.5	2011-2012	106	58	0	0	0	0	0	0	0	0	0	≥25	0	0	Female	20-39 years	Non-Hispanic Black	College or above	Never Married	4	Never	480	Low activity
69256	1	101	126	174	47	23	22	4	9	2.8	92	5.107	18.12	108.72	6.1	154	48	1.8	0.5	5.7	286	12.8	0	0.1655	1924.5	2011-2012	123.3333333	82	0	0	0	1	1	1	0	0	1	≥25	1	0	Male	40-59 years	Other Race-Including Multi-Racial	Middle school or lower	Married or living with a partner	1	Current	1800	Medium activity
69259	2	96	84.2	160	63	22	27	3.8	9	3.1	110	6.106	12.79	76.74	5.4	94	71	2.8	0.6	3.9	260	2.5	106.1	0	2220	2011-2012	116	84	0	0	0	0	0	0	0	1	0	<25	0	0	Male	20-39 years	Other Race-Including Multi-Racial	College or above	Never Married	3	Former	1680	Low activity
69272	2	93	90.2	730	33	12	18	3.9	9.5	3.6	318	17.652	6.5	39	11.2	0	32	2.2	0.5	6.3	350	27.2	0	0.02	440	2011-2012	135	90	1	0	0	0	1	1	0	0	0	≥25	0	1	Female	40-59 years	Other Hispanic	Middle school or lower	Married or living with a partner	1	Never	1680	Low activity
69277	3	91	89.6	260	34	23	25	5	9.8	2.7	96	5.329	14.55	87.3	4.9	135	43	1.8	0.5	4	262	11.4	44.4	0	1215	2011-2012	112	69.33333333	0	0	0	0	0	0	0	1	0	<25	0	0	Male	20-39 years	Other Race-Including Multi-Racial	College or above	Never Married	3	Former	720	Low activity
69286	1	93	98	148	12	17	18	4.6	9.3	2.5	106	5.884	16.68	100.08	5.6	142	48	1.8	0.4	3.8	268	3.5	0	0.291	2301	2011-2012	120.6666667	79.33333333	0	0	0	0	0	0	0	0	0	≥25	0	0	Male	20-39 years	Other Race-Including Multi-Racial	College or above	Never Married	4	Former	420	Low activity
69288	2	100	90.3	153	18	28	35	4.3	9.5	3.3	101	5.607	4.27	25.62	6.1	0	73	1.7	0.4	3.1	231	77	33.45	0.0075	1067	2011-2012	160.6666667	74	1	0	0	0	0	0	0	1	0	<25	0	1	Female	60 and above years	Non-Hispanic Black	Middle school or lower	Married or living with a partner	1	Never	0	Inactive
69307	2	99	74	62	16	13	19	4.3	9.5	3.3	102	5.662	4.6	27.6	6	180	69	1.7	0.3	4	205	13.2	0	0.003	1176	2011-2012	152	90.66666667	0	0	0	0	0	0	0	0	0	<25	0	0	Male	40-59 years	Non-Hispanic Black	Middle school or lower	Widowed/Divorced/Separated	2	Current	6720	High activity
69314	1	96	97.2	97	36	15	20	3.5	8.8	4.4	100	5.551	10.26	61.56	6.1	0	34	1.5	0.8	3	160	17.4	18.7	0.238	1957	2011-2012	100.6666667	58.66666667	0	0	0	0	0	0	0	0	0	≥25	0	0	Male	40-59 years	Non-Hispanic Black	Middle school or lower	Married or living with a partner	2	Current	480	Low activity
69325	1	97	95.2	123	17	16	15	3.5	8.7	3	86	4.774	11.18	67.08	5.6	104	50	3.5	0.8	4	295	11.9	22.3	0.0485	2198.5	2011-2012	116.6666667	72.66666667	0	0	0	0	0	0	0	1	0	≥25	0	0	Female	20-39 years	Other Race-Including Multi-Racial	College or above	Married or living with a partner	4	Current	1920	Medium activity
69343	2	91	95.1	246	14	25	23	5	9.9	2.9	111	6.162	22.15	132.9	5.6	109	39	1.9	0.6	5.1	224	4.6	0	0.106	2726	2011-2012	122	61.33333333	0	0	0	0	0	0	0	0	0	≥25	0	1	Male	20-39 years	Non-Hispanic White	High School	Never Married	4	Never	480	Low activity
69409	3	91	82.5	48	13	17	23	4.1	9.2	3.1	77	4.274	3.05	18.3	4.5	83	83	1.8	0.6	4.8	223	6.3	23.4	0.177	2461.5	2011-2012	114.6666667	73.33333333	0	0	0	0	0	0	0	1	0	<25	0	0	Female	40-59 years	Non-Hispanic Black	College or above	Never Married	4	Never	960	Low activity
69411	1	95	116.9	624	39	32	41	4.2	10.2	2.9	162	8.993	78.3	469.8	7.5	0	28	1.6	0.7	4.4	263	14.6	0	0.1975	1973	2011-2012	107.3333333	54.66666667	1	1	0	1	1	1	0	0	1	≥25	1	1	Male	60 and above years	Non-Hispanic White	College or above	Married or living with a partner	3	Never	0	Inactive
69428	1	101	131	132	39	37	30	4.1	9.4	2.9	120	6.661	30.23	181.38	5.6	0	51	3.3	0.5	3.9	203	31	0	0.1	1548	2011-2012	105.3333333	71.33333333	1	1	0	1	1	1	0	0	1	≥25	1	1	Female	40-59 years	Non-Hispanic White	High School	Married or living with a partner	3	Never	0	Inactive
69431	2	100	84.8	72	43	24	22	4	8.9	3.4	109	6.051	3.63	21.78	6.7	0	64	2.6	0.8	5.1	27	3.1	0	0.0025	1544	2011-2012	176	55.33333333	1	1	1	0	0	0	0	0	0	<25	0	0	Female	60 and above years	Non-Hispanic Black	College or above	Married or living with a partner	4	Current	1440	Low activity
69450	1	100	80	95	14	22	24	4.8	9.5	2.8	86	4.774	8.93	53.58	4.5	139	59	2.1	0.4	4.2	229	1	18.7	0.1035	1996	2011-2012	122	73.33333333	0	0	0	0	0	0	0	0	0	<25	0	0	Female	20-39 years	Non-Hispanic White	College or above	Married or living with a partner	4	Never	720	Low activity
69452	3	91	110	133	52	41	24	4.1	9.4	2.8	91	5.051	17.18	103.08	5.7	128	47	2.7	0.3	5.4	196	5.2	0	0.266	2626	2011-2012	124	78	0	0	0	1	1	1	0	0	1	≥25	1	0	Female	40-59 years	Non-Hispanic White	High School	Married or living with a partner	4	Never	1800	Medium activity
69460	1	90	110.5	195	17	21	19	4.3	9.1	2	100	5.551	6.8	40.8	5.5	72	36	2.2	0.8	4.8	237	8.7	80.4	0.3135	2150	2011-2012	132	75.33333333	0	0	0	0	1	1	0	1	0	≥25	0	1	Male	40-59 years	Other Hispanic	Middle school or lower	Married or living with a partner	3	Current	0	Inactive
69463	3	92	93.4	117	28	39	26	4.4	9.5	3.7	105	5.829	8.58	51.48	5	0	41	2.3	0.9	3.8	325	5.4	0	NA	0	2011-2012	118.6666667	62	0	0	0	0	0	0	0	0	0	≥25	0	0	Male	20-39 years	Non-Hispanic White	Middle school or lower	Married or living with a partner	2	Current	17280	High activity
69474	2	93	84.3	72	13	24	25	4.5	10.2	3.3	93	5.162	6.36	38.16	5.8	136	71	2.2	0.4	3.5	256	5.3	0	0.074	1692	2011-2012	125.3333333	58.66666667	0	0	0	0	0	0	0	0	0	<25	0	0	Female	60 and above years	Other Hispanic	High School	Never Married	2	Never	360	Low activity
69494	1	95	80.2	62	11	11	15	4.5	9.3	2.9	98	5.44	8.37	50.22	5.3	71	62	1.7	0.4	2.4	263	12.4	0	0.067	903	2011-2012	100	68	0	0	0	0	0	0	0	0	0	<25	0	0	Female	20-39 years	Non-Hispanic White	High School	Married or living with a partner	2	Never	300	Low activity
69504	1	93	78.7	91	13	16	23	4.5	9.1	2.5	103	5.718	5.16	30.96	5.5	72	50	1.7	0.3	1.7	156	0.9	0	0.1775	1977	2011-2012	118.6666667	74	0	0	0	0	0	0	0	0	0	<25	0	0	Male	40-59 years	Other Race-Including Multi-Racial	College or above	Married or living with a partner	4	Never	1600	Low activity
69513	1	99	97.1	91	57	25	20	4.6	9.6	3	89	4.94	16.11	96.66	6	119	46	3.3	0.6	5.4	250	23	0	0.211	2228	2011-2012	125.3333333	74.66666667	0	0	0	0	0	0	0	0	0	<25	0	0	Male	40-59 years	Non-Hispanic Black	College or above	Married or living with a partner	4	Current	0	Inactive
69514	1	96	100	163	116	48	26	4	8.8	3.6	84	4.663	8	48	4.3	78	70	1.1	0.6	2.6	305	12.8	0	0	2427	2011-2012	121.3333333	80.66666667	0	0	0	0	1	1	0	0	0	≥25	0	0	Male	40-59 years	Non-Hispanic Black	High School	Married or living with a partner	3	Current	10440	High activity
69516	1	99	109.9	255	40	18	20	4.1	9.1	3.3	90	4.996	10.47	62.82	5.5	139	47	1.9	0.9	4.9	250	30.8	136.95	0.044	2627.5	2011-2012	131.3333333	66.66666667	0	0	0	1	1	1	0	1	0	≥25	1	1	Male	60 and above years	Non-Hispanic White	High School	Married or living with a partner	3	Current	320	Low activity
69523	1	99	121	134	17	17	18	4.5	9.4	2.9	135	7.494	13.76	82.56	5.5	137	35	1.6	0.5	5.5	167	2.1	0	0.17	2023	2011-2012	92	72	1	0	0	1	1	1	0	0	1	≥25	1	1	Male	40-59 years	Non-Hispanic White	High School	Widowed/Divorced/Separated	4	Current	800	Low activity
69534	1	96	97	54	17	14	21	4.1	9	3.4	98	5.44	12.23	73.38	4.8	104	69	2	0.4	1.7	176	0.5	0	0.005	2692	2011-2012	109.3333333	62.66666667	0	0	0	0	0	0	0	0	0	≥25	0	0	Female	20-39 years	Non-Hispanic Black	College or above	Married or living with a partner	4	Never	0	Inactive
69536	2	95	100	237	19	41	22	4.3	9	2.7	95	5.273	11.66	69.96	5.6	98	47	2.2	0.4	3.9	214	6.8	0	0.355	1592.5	2011-2012	144.6666667	66.66666667	0	0	0	0	1	1	0	0	0	≥25	0	1	Female	40-59 years	Non-Hispanic White	High School	Married or living with a partner	3	Never	420	Low activity
69560	2	102	88.9	163	20	19	15	4.1	8.9	2.8	97	5.384	8.86	53.16	5.5	75	34	2.1	0.5	3.4	206	5.1	0	0	2537	2011-2012	116.6666667	68	0	0	0	0	0	0	0	0	0	<25	0	0	Male	20-39 years	Other Hispanic	Middle school or lower	Never Married	1	Current	1920	Medium activity
69569	1	92	72.2	96	18	28	33	4.6	9.8	2.5	92	5.107	4.76	28.56	5.3	125	76	2.8	0.4	2.3	163	1.7	0	0.1935	1484	2011-2012	135.3333333	66.66666667	0	0	0	0	0	0	0	0	0	<25	0	0	Female	60 and above years	Other Race-Including Multi-Racial	High School	Married or living with a partner	3	Never	0	Inactive
69574	1	97	87.2	88	10	18	26	4.6	10	3.3	90	4.996	8.52	51.12	5.4	47	64	2	0.3	1.9	246	3.4	0	0.079	1520.5	2011-2012	119.3333333	81.33333333	0	0	0	0	0	0	1	0	0	<25	0	0	Female	40-59 years	Non-Hispanic White	College or above	Married or living with a partner	4	Current	5160	High activity
69594	1	95	80	63	35	23	28	4.8	9.4	2.7	89	4.94	2.69	16.14	5.8	0	48	4.4	1	8.9	376	3.3	0	0.1355	2509	2011-2012	108	71.33333333	0	0	0	0	0	0	0	0	0	<25	0	0	Male	20-39 years	Non-Hispanic White	High School	Married or living with a partner	2	Current	960	Low activity
69613	1	96	78.3	64	12	12	22	4.8	9.7	2.6	83	4.607	6.05	36.3	5.1	68	91	1.4	0.5	2.9	285	2.7	33.05	0.1095	2147.5	2011-2012	110	68.66666667	0	0	0	0	0	0	0	1	0	<25	0	0	Female	20-39 years	Other Race-Including Multi-Racial	High School	Married or living with a partner	4	Never	2640	Medium activity
69617	1	91	91.7	33	12	15	21	4.3	9.4	1.7	85	4.718	4.78	28.68	5.2	65	55	1.6	0.5	1.8	163	3.1	0	0.005	1418	2011-2012	111.3333333	65.33333333	0	0	0	0	0	0	0	0	0	≥25	0	0	Female	20-39 years	Non-Hispanic White	High School	Widowed/Divorced/Separated	3	Never	1760	Low activity
69630	1	103	84	58	21	20	26	4.4	9.1	2.4	86	4.774	6.31	37.86	5.1	80	66	1.8	0.4	2.6	181	5.1	28.1	0.0625	1626.5	2011-2012	104.6666667	72	0	0	0	0	0	0	0	0	0	≥25	0	0	Male	20-39 years	Mexican American	High School	Married or living with a partner	1	Never	18180	High activity
69647	2	102	102.5	102	23	27	29	4.4	9.8	2.8	106	5.884	10.84	65.04	5.2	88	48	3.2	0.7	6	327	16.3	0	0.323	3255	2011-2012	128	83.33333333	0	0	0	0	1	1	0	0	0	≥25	0	0	Male	20-39 years	Non-Hispanic White	Middle school or lower	Married or living with a partner	3	Current	12960	High activity
69666	1	95	98.5	81	23	15	24	4.1	9	3.1	97	5.384	9.47	56.82	6.1	124	58	0.6	0.4	5.5	207	5.7	0	0.104	1517.5	2011-2012	131.3333333	46	0	1	0	0	1	1	0	0	0	≥25	0	0	Female	60 and above years	Non-Hispanic White	High School	Married or living with a partner	3	Never	0	Inactive
69684	2	93	116.4	251	21	21	20	4.5	9.1	2.6	240	13.322	15.98	95.88	8.9	416	34	1.6	0.6	6	191	215	0	0.232	1814	2011-2012	132.6666667	84.66666667	1	0	0	1	1	1	0	0	1	≥25	1	1	Male	60 and above years	Other Hispanic	Middle school or lower	Widowed/Divorced/Separated	1	Current	5760	High activity
69687	1	97	80.2	74	12	19	21	4.1	9.3	2.7	95	5.273	7.96	47.76	5.3	130	59	2.4	0.6	3	179	6.7	0	0.1405	1718	2011-2012	128	73.33333333	0	0	0	0	0	0	0	0	0	<25	0	0	Female	40-59 years	Non-Hispanic White	College or above	Married or living with a partner	4	Never	2400	Medium activity
69698	2	99	103	126	34	34	41	4	9.3	3.1	241	13.378	13.91	83.46	10.7	0	44	1.9	0.3	3.2	222	10.8	0	0.074	3030	2011-2012	126.6666667	69.33333333	1	0	0	1	1	1	0	0	1	≥25	1	1	Male	40-59 years	Non-Hispanic Black	High School	Widowed/Divorced/Separated	1	Never	120	Low activity
69700	2	91	90	53	14	16	15	4.2	9	3.3	100	5.551	29	174	5.6	0	43	1.9	0.4	4.6	258	15	0	0.029	2285	2011-2012	102.6666667	64.66666667	0	0	0	1	0	1	0	0	1	≥25	1	0	Female	20-39 years	Other Hispanic	High School	Never Married	1	Never	0	Inactive
69701	2	101	95.4	117	296	443	302	4.3	9.4	2.9	97	5.384	7.04	42.24	4.8	88	83	1.1	0.3	2.3	252	9.9	39.25	0.011	1938.5	2011-2012	130	92	0	0	1	0	1	1	0	1	0	<25	0	0	Male	40-59 years	Non-Hispanic Black	High School	Never Married	3	Never	18800	High activity
69732	3	90	94.5	143	51	33	26	4.8	9.4	2.6	110	6.106	15.02	90.12	5.2	174	63	2.4	0.4	3.7	238	4.2	0	0.002	1334.5	2011-2012	125.3333333	79.33333333	0	0	0	1	1	1	1	0	0	≥25	1	0	Male	20-39 years	Other Race-Including Multi-Racial	College or above	Married or living with a partner	1	Current	1440	Low activity
69747	3	90	118.4	40	16	21	23	4	9.3	2.9	97	5.384	16.29	97.74	5.7	127	49	2	0.4	4.2	247	6	0	0	1478	2011-2012	113.3333333	55.33333333	0	0	0	0	1	1	0	0	0	≥25	0	0	Female	20-39 years	Non-Hispanic Black	College or above	Widowed/Divorced/Separated	1	Never	0	Inactive
69755	2	102	99.1	249	18	31	28	4.5	9.3	2.5	109	6.051	14.82	88.92	5.7	142	51	1.6	0.4	2.6	243	7.7	0	0.315	1746.5	2011-2012	112.6666667	74	0	0	0	1	1	1	0	0	1	≥25	1	0	Female	60 and above years	Non-Hispanic White	College or above	Married or living with a partner	4	Never	0	Inactive
69774	3	90	102.7	304	28	23	22	4.2	9.5	2.8	104	5.773	16.72	100.32	5.3	103	37	2	0.7	7.6	249	1.7	0	0.109	2572	2011-2012	104.6666667	68.66666667	0	0	0	1	1	1	0	0	1	≥25	1	1	Male	40-59 years	Other Hispanic	Middle school or lower	Married or living with a partner	3	Current	10320	High activity
69778	2	94	104.4	185	32	23	14	4.3	9.5	3.7	106	5.884	17.72	106.32	6	155	41	1.8	0.4	4.8	310	1.2	0	0.062	2092	2011-2012	119.3333333	64.66666667	0	0	0	1	1	1	0	0	1	≥25	1	0	Male	40-59 years	Mexican American	High School	Married or living with a partner	4	Never	480	Low activity
69783	2	96	67.5	63	11	14	23	4.3	9.4	2.4	99	5.495	4.44	26.64	5.5	114	92	1.6	0.5	3.7	204	6.1	0	0.001	1701.5	2011-2012	133	69	0	0	0	0	0	0	0	0	0	<25	0	0	Female	60 and above years	Other Race-Including Multi-Racial	College or above	Never Married	1	Never	200	Low activity
69798	2	101	74	78	15	17	20	4.3	9.7	3.5	87	4.829	9.88	59.28	4.9	65	56	1.6	0.6	6.6	227	202.1	0	0.127	2407.5	2011-2012	115.3333333	70.66666667	0	0	0	0	0	0	0	0	0	<25	0	0	Female	20-39 years	Non-Hispanic White	High School	Never Married	1	Never	8640	High activity
69813	1	96	102	56	19	14	18	4.5	9.1	2.5	93	5.162	10.89	65.34	4.6	92	39	1.8	0.5	3.8	176	22.8	73.6	0.098	3518	2011-2012	109.3333333	56	0	0	0	0	1	1	0	1	0	≥25	0	0	Female	20-39 years	Non-Hispanic Black	High School	Never Married	3	Never	11040	High activity
69815	2	96	123.1	116	21	24	25	4.4	9.4	2.9	111	6.162	44.6	267.6	6.1	0	57	2.2	0.6	4	296	104	0	0	1534.5	2011-2012	128	49.33333333	1	0	0	1	1	1	0	0	1	≥25	1	1	Female	60 and above years	Non-Hispanic Black	High School	Widowed/Divorced/Separated	3	Never	0	Inactive
69854	1	95	138	235	221	22	22	3.9	9.3	3.8	130	7.216	9.49	56.94	10.1	0	39	1.9	0.6	3.8	249	70	0	0.487	1764	2011-2012	125.3333333	66.66666667	1	1	0	1	1	1	0	0	1	≥25	1	1	Male	60 and above years	Other Race-Including Multi-Racial	High School	Married or living with a partner	4	Current	600	Low activity
69862	1	94	95	175	48	19	21	4	9.1	1.3	88	4.885	6.77	40.62	5	120	58	2.2	0.7	6.9	261	5.6	50.9	5.00E-04	2312.5	2011-2012	117.3333333	69.33333333	0	0	0	0	1	1	0	1	0	≥25	0	0	Female	20-39 years	Non-Hispanic White	College or above	Married or living with a partner	4	Current	1560	Low activity
69863	2	95	111.2	93	40	35	23	4.4	9.5	2.4	101	5.607	6.02	36.12	5.5	113	39	1.9	0.6	5.1	224	4	0	0.2245	1365.5	2011-2012	156.6666667	102	0	0	0	0	1	1	0	0	0	≥25	0	1	Male	40-59 years	Non-Hispanic White	High School	Married or living with a partner	3	Never	17040	High activity
69896	2	91	98.5	512	14	21	19	4	9.4	2.8	113	6.273	26.8	160.8	5.3	96	38	2	0.5	2.7	219	0.7	0	0.48	2610	2011-2012	118.6666667	76	0	0	0	1	1	1	0	0	1	<25	1	1	Male	40-59 years	Non-Hispanic White	High School	Never Married	3	Current	5280	High activity
69910	1	101	73.6	45	18	19	22	4.6	9.7	2.8	89	4.94	5.03	30.18	5.3	59	66	1.9	0.6	3.8	203	3.8	0	0.126	2259	2011-2012	118.6666667	68	0	0	0	0	0	0	0	0	0	<25	0	0	Male	20-39 years	Non-Hispanic White	Middle school or lower	Never Married	1	Current	5760	High activity
69916	1	90	83	58	7	12	17	4.6	9.5	2.5	90	4.996	8.91	53.46	5.5	56	40	2.6	0.8	4.8	223	15.9	0	0.029	2402.5	2011-2012	97.33333333	59.33333333	0	0	0	0	0	0	0	0	0	<25	0	0	Female	20-39 years	Other Hispanic	Middle school or lower	Never Married	3	Never	0	Inactive
69924	2	95	75	133	24	12	20	4	9.7	3.9	106	5.884	7.22	43.32	5.6	119	59	2.9	0.7	6	346	28.2	0	0	1697	2011-2012	138.6666667	69.33333333	0	0	0	0	0	0	0	0	0	<25	0	0	Male	60 and above years	Non-Hispanic White	Middle school or lower	Married or living with a partner	1	Current	0	Inactive
69925	1	99	111.9	96	197	33	52	3.7	9.6	4	83	4.607	28.03	168.18	4.5	143	61	2.1	0.5	3.5	182	13.9	0	0.0085	720.5	2011-2012	138.6666667	63.33333333	0	1	1	1	1	1	0	0	1	≥25	1	0	Female	60 and above years	Mexican American	Middle school or lower	Never Married	2	Never	0	Inactive
69930	1	94	110.5	289	23	16	19	4.2	8.9	3	84	4.663	6.82	40.92	5	154	53	1.4	0.3	3.8	230	15.6	0	0.0835	2174	2011-2012	116	72.66666667	0	0	0	0	1	1	0	0	0	≥25	0	0	Female	20-39 years	Non-Hispanic White	College or above	Married or living with a partner	3	Never	120	Low activity
69963	2	101	72.1	49	14	22	19	4.1	9.4	2.7	93	5.162	12.29	73.74	5.4	64	66	2.3	0.6	2.3	281	3.9	12.1	0.001	2787.5	2011-2012	122	67.33333333	0	0	0	0	0	0	0	0	0	<25	0	0	Female	20-39 years	Non-Hispanic Black	High School	Never Married	2	Never	1500	Low activity
69989	2	90	95.5	80	17	14	17	4	9.8	3.4	125	6.939	6.66	39.96	8.3	0	61	3.5	0.6	4.8	246	24.2	21.1	0.143	989	2011-2012	140.6666667	64	1	0	0	0	0	0	0	1	0	≥25	0	1	Female	60 and above years	Other Hispanic	Middle school or lower	Married or living with a partner	1	Never	3360	Medium activity
69991	2	90	90.5	115	17	20	23	4.3	9.3	3	94	5.218	10.7	64.2	5.9	120	57	1.7	0.3	3.2	222	2	4.6	0.1955	2572	2011-2012	104	76.66666667	0	0	0	0	0	0	0	0	0	≥25	0	0	Female	40-59 years	Non-Hispanic White	High School	Widowed/Divorced/Separated	2	Never	2880	Medium activity
70046	2	95	85.7	173	25	38	25	4.3	9.8	3	108	5.995	15.36	92.16	5.2	172	52	1.1	0.4	7.9	174	3.4	0	0.119	2907	2011-2012	130	82.66666667	0	0	0	0	0	0	0	0	0	<25	0	0	Male	40-59 years	Non-Hispanic White	High School	Widowed/Divorced/Separated	2	Never	480	Low activity
70049	2	102	106.1	326	26	45	31	4.3	9.2	2.8	105	5.829	18.4	110.4	5.8	129	33	2.9	0.5	4.2	256	2.1	0	0.023	1177	2011-2012	144	77.33333333	0	0	0	1	1	1	0	0	1	≥25	1	1	Male	40-59 years	Other Race-Including Multi-Racial	Middle school or lower	Married or living with a partner	3	Former	120	Low activity
70072	2	101	122	145	66	61	26	4.4	9.4	3.6	172	9.548	30.17	181.02	8.1	0	38	1.4	0.4	3	146	16.7	37.45	0.01	2130	2011-2012	148	87.33333333	1	0	0	1	1	1	0	1	0	≥25	1	1	Male	40-59 years	Non-Hispanic Black	College or above	Widowed/Divorced/Separated	3	Former	180	Low activity
70125	2	101	122.5	39	12	12	18	4.5	9.4	2.2	92	5.107	5.83	34.98	5.8	81	76	2.3	0.5	1.8	161	8	0	0.0505	2543	2011-2012	124	74	0	0	0	0	1	1	0	0	0	≥25	0	0	Male	20-39 years	Non-Hispanic Black	High School	Never Married	2	Current	3360	Medium activity
70151	3	92	97.7	105	18	16	21	3.7	8.7	3.2	113	6.273	9.41	56.46	6	0	69	1.9	0.7	6.8	258	10	23.15	0.038	1237	2011-2012	117.3333333	60.66666667	0	1	0	0	0	0	0	1	0	≥25	0	1	Female	60 and above years	Non-Hispanic White	High School	Widowed/Divorced/Separated	3	Current	720	Low activity
70196	2	96	106.9	270	22	37	34	4.7	9.4	2.8	109	6.051	14.39	86.34	5.5	105	40	1.3	0.4	3.8	285	10	0	0.097	1019	2011-2012	94.66666667	44	0	0	0	1	1	1	0	0	1	≥25	1	0	Male	20-39 years	Mexican American	Middle school or lower	Never Married	1	Never	9600	High activity
70202	1	95	94	520	68	67	39	4.5	9.4	2.7	111	6.162	22.92	137.52	4.9	101	36	2.3	0.4	2.7	228	15.2	72.85	0.093	2983	2011-2012	119.3333333	78.66666667	0	0	0	1	1	1	0	1	0	≥25	1	1	Male	20-39 years	Other Race-Including Multi-Racial	High School	Never Married	1	Current	3280	Medium activity
70204	2	100	122.2	100	18	14	20	3.6	9	3.3	104	5.773	28.77	172.62	5.4	111	36	3.1	0.3	5.6	322	23.4	0	5.00E-04	1028.5	2011-2012	112	69.33333333	0	0	0	1	1	1	0	0	1	≥25	1	0	Female	20-39 years	Non-Hispanic Black	High School	Never Married	2	Never	280	Low activity
70223	2	91	109	139	20	24	17	4.2	9.1	2.3	93	5.162	11.31	67.86	5.3	92	47	2	0.7	3.3	324	113	0	0.4025	1313	2011-2012	103.3333333	68.66666667	0	0	0	0	1	1	0	0	0	≥25	0	0	Male	40-59 years	Non-Hispanic White	High School	Widowed/Divorced/Separated	1	Never	20040	High activity
70231	2	102	100.5	164	12	21	27	3.9	9.4	2.8	95	5.273	28.07	168.42	5.4	123	32	2	0.7	3.4	237	2.8	0	0.061	1676	2011-2012	157.3333333	98.66666667	0	0	0	1	1	1	0	0	1	≥25	1	1	Female	20-39 years	Other Race-Including Multi-Racial	College or above	Married or living with a partner	4	Current	120	Low activity
70297	1	94	94.7	58	15	17	21	4.3	9.4	2.1	88	4.885	5.69	34.14	5.5	108	63	1	0.5	4.7	212	2.3	41	0.388	1717	2011-2012	149.3333333	67.33333333	0	0	0	0	0	0	0	1	0	<25	0	0	Male	60 and above years	Non-Hispanic White	Middle school or lower	Married or living with a partner	3	Current	320	Low activity
70300	1	99	103	363	92	46	32	4.6	9.3	2.6	107	5.94	15.43	92.58	5.5	160	33	1.5	0.4	4	214	16.6	0	0.0295	2029	2011-2012	119.3333333	87.33333333	0	0	0	1	1	1	0	0	1	≥25	1	1	Male	40-59 years	Non-Hispanic White	College or above	Never Married	1	Never	0	Inactive
70333	1	98	72.7	102	7	13	20	4.1	9.5	2.9	90	4.996	8.34	50.04	5.2	84	89	2.1	0.5	2.8	260	2.5	0	0	1983	2011-2012	98.66666667	83.33333333	0	0	0	0	0	0	0	0	0	<25	0	0	Female	20-39 years	Mexican American	High School	Never Married	4	Never	240	Low activity
70335	1	91	109.5	199	8	13	22	3.9	9.3	2.7	81	4.496	12.1	72.6	5.6	0	69	2.2	0.6	6.6	303	71	0	0.003	2060.5	2011-2012	126	72.66666667	0	0	0	0	1	1	0	0	0	≥25	0	0	Female	40-59 years	Non-Hispanic White	High School	Widowed/Divorced/Separated	2	Current	1200	Low activity
70341	1	92	98.6	81	10	25	28	4.3	9.1	2.8	99	5.495	12.94	77.64	5.5	73	55	1.5	0.4	2.8	188	3.1	0	0.0215	1554	2011-2012	114	64.66666667	0	0	0	0	0	0	0	0	0	≥25	0	0	Male	60 and above years	Other Race-Including Multi-Racial	High School	Married or living with a partner	4	Never	12240	High activity
70357	1	91	80.5	113	11	18	21	3.9	9.1	2.9	90	4.996	8.02	48.12	5.8	131	43	2.1	0.3	3.6	249	1.7	0	0.0285	1409	2011-2012	124	81.33333333	0	0	0	0	0	0	0	0	0	<25	0	0	Female	40-59 years	Other Race-Including Multi-Racial	College or above	Married or living with a partner	4	Never	900	Low activity
70394	1	103	100	142	45	36	33	4.3	9.4	3.2	82	4.552	8.23	49.38	5	74	45	1.4	0.5	3.5	225	0.5	0	0.075	3110.5	2011-2012	122	72.66666667	0	0	0	0	1	1	0	0	0	≥25	0	0	Male	40-59 years	Other Race-Including Multi-Racial	College or above	Never Married	4	Current	2040	Medium activity
70398	2	90	83.3	57	16	22	20	4.4	9.6	2.8	98	5.44	5.88	35.28	5.8	94	80	1.2	0.2	1.8	159	7.5	24.5	0.101	1262.5	2011-2012	104.6666667	56	0	0	0	0	0	0	0	1	0	≥25	0	0	Female	40-59 years	Other Hispanic	Middle school or lower	Widowed/Divorced/Separated	2	Never	8640	High activity
70399	1	94	89.2	58	15	27	19	4.8	9.6	2.4	101	5.607	19.17	115.02	5	135	49	1.9	0.3	5.3	214	15	0	0.0705	1894	2011-2012	114.6666667	68	0	0	0	0	0	0	0	0	0	<25	0	0	Male	20-39 years	Other Race-Including Multi-Racial	High School	Never Married	1	Current	900	Low activity
70405	1	91	111.6	150	15	15	21	4.1	9.4	3	88	4.885	10.9	65.4	5.3	90	53	1.8	0.7	3.3	210	3.4	0	0.1185	2284.5	2011-2012	109.3333333	78	0	0	0	0	1	1	0	0	0	≥25	0	0	Female	60 and above years	Non-Hispanic White	College or above	Married or living with a partner	4	Never	120	Low activity
70408	1	93	116.9	144	19	33	31	4	9.2	3.5	92	5.107	21.88	131.28	5.6	112	43	2.4	0.3	2.4	229	7.4	0	0.0075	1690	2011-2012	136	77.33333333	0	0	0	0	1	1	0	0	0	≥25	0	0	Male	20-39 years	Non-Hispanic Black	College or above	Never Married	4	Never	1020	Low activity
70427	2	92	69.7	38	21	35	27	4.3	9.4	2.6	99	5.495	9.11	54.66	5.6	0	83	2.3	0.4	3	224	195	0	0	1153.5	2011-2012	84	48	0	0	0	0	0	0	0	0	0	<25	0	0	Female	20-39 years	Non-Hispanic White	College or above	Married or living with a partner	4	Never	720	Low activity
70448	3	91	95.9	144	71	33	29	4.9	9.3	3	102	5.662	23.15	138.9	5.4	130	45	1.4	0.4	3.6	271	9.2	0	0.151	2852.5	2011-2012	128	64.66666667	0	0	0	1	1	1	0	0	1	≥25	1	0	Male	20-39 years	Mexican American	High School	Widowed/Divorced/Separated	1	Current	10080	High activity
70470	2	92	98.9	66	34	23	26	4	9	3.4	103	5.718	13.63	81.78	5.5	152	73	1.9	0.3	3.4	232	15.8	0	NA	0	2011-2012	111.3333333	78	0	0	0	1	1	1	0	0	1	≥25	1	0	Female	40-59 years	Other Race-Including Multi-Racial	High School	Married or living with a partner	4	Current	2800	Medium activity
70485	3	90	76.8	201	13	29	24	5	10.3	2.8	98	5.44	7.24	43.44	5.3	122	51	2.2	0.4	1.7	185	4	0	0	1534.5	2011-2012	100	68	0	0	0	0	0	0	0	0	0	<25	0	0	Male	20-39 years	Other Race-Including Multi-Racial	College or above	Never Married	4	Current	480	Low activity
70493	2	95	96	78	27	26	20	3.9	9.3	3.4	223	12.379	19.15	114.9	9.6	0	51	2.2	0.2	2.2	275	16.3	0	0.201	2322	2011-2012	120	76	1	0	0	1	0	1	0	0	1	≥25	1	0	Male	40-59 years	Other Race-Including Multi-Racial	Middle school or lower	Never Married	1	Current	0	Inactive
70498	1	99	113.3	154	25	25	20	4.4	9.2	2.5	127	7.05	15.4	92.4	6.6	183	46	1.4	0.3	3.3	316	5.8	0	0.387	2029.5	2011-2012	132	106.6666667	1	0	0	1	1	1	0	0	1	≥25	1	1	Female	60 and above years	Non-Hispanic White	College or above	Never Married	4	Never	1200	Low activity
70566	2	95	87.2	47	12	11	15	4.2	9.4	3.2	91	5.051	11.11	66.66	5.3	131	75	1.5	0.2	5.2	221	13.5	26.35	0.206	2296	2011-2012	100	64.66666667	0	0	0	0	0	0	0	1	0	≥25	0	0	Female	20-39 years	Non-Hispanic Black	High School	Never Married	1	Never	0	Inactive
70573	3	92	110.3	94	17	23	21	4.2	9.5	2.6	93	5.162	13.22	79.32	5	93	43	2.4	0.7	6.8	223	7	0	0	2856	2011-2012	119.3333333	57.33333333	0	0	0	1	1	1	0	0	1	≥25	1	0	Male	20-39 years	Mexican American	High School	Never Married	3	Never	26880	High activity
70580	1	90	95.8	277	20	27	30	4.4	9.3	3.6	116	6.439	10.89	65.34	6.3	126	48	3.1	0.7	2.4	294	3.5	83.75	0.154	3084.5	2011-2012	124	71.33333333	0	0	0	0	0	0	0	1	0	≥25	0	1	Male	40-59 years	Non-Hispanic Black	High School	Married or living with a partner	2	Current	1440	Low activity
70596	1	91	85.7	167	17	21	17	4.5	9.3	3	91	5.051	15.1	90.6	5.4	112	36	5	0.6	6.4	345	8.4	12.45	0.1455	2449	2011-2012	106.6666667	74.66666667	0	0	0	0	0	0	0	0	0	<25	0	0	Female	20-39 years	Non-Hispanic White	College or above	Married or living with a partner	4	Current	720	Low activity
70604	2	92	76.9	67	18	10	27	4.6	9.1	2.8	93	5.162	3.43	20.58	5.7	119	80	1.9	0.3	2.5	194	4.8	60.7	0.1045	2361	2011-2012	112	76	0	0	0	0	0	0	0	1	0	<25	0	0	Male	20-39 years	Other Race-Including Multi-Racial	College or above	Married or living with a partner	4	Current	3120	Medium activity
70617	2	97	102.2	1550	159	28	33	3.6	8	2.4	75	4.163	3.14	18.84	4.6	194	27	NA	NA	NA	272	13.5	46.95	0.0025	916	2011-2012	96.66666667	57.33333333	0	0	0	0	1	1	0	1	0	≥25	0	1	Female	40-59 years	Non-Hispanic White	High School	Married or living with a partner	1	Current	40	Low activity
70626	2	97	105.7	207	28	36	24	4.8	9.8	2.5	98	5.44	23.63	141.78	5.6	90	42	1.4	0.6	4.7	288	3.1	0	0.302	3762	2011-2012	116.6666667	82.66666667	0	0	0	1	1	1	0	0	1	≥25	1	0	Male	20-39 years	Non-Hispanic White	High School	Married or living with a partner	1	Current	1440	Low activity
70649	2	98	112.2	65	26	28	21	4.4	9.1	2.8	109	6.051	15.63	93.78	6.1	0	50	1.6	0.8	7.4	206	14.4	22.3	0.3215	2550	2011-2012	106.6666667	70.66666667	1	0	0	1	1	1	0	0	1	≥25	1	1	Male	60 and above years	Other Hispanic	High School	Married or living with a partner	4	Never	0	Inactive
70670	1	90	108.8	125	26	17	15	3.6	8.9	2.9	172	9.548	5.83	34.98	12.4	0	51	2.2	0.6	3.5	217	21.2	0	0.065	1641.5	2011-2012	152.6666667	78	1	0	0	0	1	1	0	0	0	≥25	0	1	Female	40-59 years	Other Hispanic	Middle school or lower	Married or living with a partner	3	Never	0	Inactive
70675	1	92	102.3	172	29	27	21	4.1	8.8	2.7	95	5.273	4.49	26.94	5.2	136	38	1.5	0.2	3.6	201	3.8	15.7	0.047	3024	2011-2012	140.6666667	74	0	0	0	0	1	1	0	0	0	≥25	0	1	Male	60 and above years	Other Race-Including Multi-Racial	High School	Married or living with a partner	4	Current	2960	Medium activity
70676	2	94	93.8	114	29	37	49	4.1	9.4	3.1	97	5.384	11.78	70.68	5.9	65	48	1.6	0.3	3.2	206	17	33.45	0.219	1498	2011-2012	134.6666667	70	0	0	1	0	0	0	0	1	0	<25	0	1	Female	60 and above years	Non-Hispanic White	High School	Widowed/Divorced/Separated	4	Current	0	Inactive
70678	2	93	89.1	88	15	14	25	4.2	9.5	2.6	94	5.218	7.27	43.62	4.9	79	60	1.9	0.7	5.5	234	7	0	0.0865	1388.5	2011-2012	112	62.66666667	0	0	0	0	0	0	0	0	0	≥25	0	0	Male	20-39 years	Other Hispanic	High School	Never Married	2	Current	13200	High activity
70716	1	103	75.7	46	29	20	26	4.4	9.7	2.9	86	4.774	3.41	20.46	5.2	54	94	1.5	0.4	2.7	227	10.2	0	0.022	1093	2011-2012	114	71.33333333	0	0	0	0	0	0	0	0	0	<25	0	0	Female	40-59 years	Non-Hispanic White	College or above	Married or living with a partner	4	Never	1440	Low activity
70718	1	94	111.2	90	67	16	25	4.3	9.3	3.6	115	6.384	14.12	84.72	6.3	0	36	1.4	1.1	8.3	161	34	0	0.136	2247.5	2011-2012	114	61.33333333	1	1	1	1	1	1	0	0	1	≥25	1	1	Male	60 and above years	Non-Hispanic White	High School	Widowed/Divorced/Separated	2	Current	3480	Medium activity
70721	2	93	107.5	169	26	15	15	3.8	9.7	2.6	160	8.882	16.6	99.6	6.4	281	59	1.7	0.6	5.6	201	13.9	0	0.023	1138	2011-2012	146	83.33333333	1	1	0	1	1	1	0	0	1	≥25	1	1	Female	60 and above years	Other Hispanic	Middle school or lower	Married or living with a partner	3	Never	960	Low activity
70725	2	93	101	56	12	10	15	3.9	9.1	3.1	111	6.162	4.73	28.38	6	101	68	1.1	0.4	2.6	184	38.2	0	0.0385	2055	2011-2012	136.6666667	83.33333333	0	1	0	0	1	1	0	0	0	≥25	0	1	Female	60 and above years	Non-Hispanic Black	College or above	Married or living with a partner	3	Never	0	Inactive
70737	2	93	89.7	184	19	16	18	4.4	9.4	2.9	91	5.051	12.49	74.94	5.1	71	51	2.1	0.6	3.5	241	2.6	0	0.069	3239	2011-2012	127.3333333	69.33333333	0	0	0	0	0	0	0	0	0	≥25	0	0	Male	20-39 years	Other Hispanic	High School	Never Married	1	Former	5040	High activity
70753	1	90	117	165	42	171	81	4.5	9.3	3.5	133	7.383	27.07	162.42	6.7	265	42	3.8	0.5	3.6	305	160	7	0.102	3887	2011-2012	132	82	1	0	0	1	1	1	0	0	1	≥25	1	1	Male	20-39 years	Mexican American	Middle school or lower	Married or living with a partner	2	Never	0	Inactive
70758	1	93	78.4	82	20	18	18	4.9	9.7	2.7	102	5.662	5.64	33.84	5.2	0	58	1.9	0.6	4.3	300	4.1	0	NA	0	2011-2012	123.3333333	60.66666667	0	0	0	0	0	0	0	0	0	<25	0	0	Male	20-39 years	Other Hispanic	High School	Never Married	2	Former	17040	High activity
70761	2	103	118.5	504	93	102	55	4.2	9.4	3.2	293	16.264	46.95	281.7	12.7	432	33	1.9	0.5	4.1	277	48	0	0.138	2408	2011-2012	136	89.33333333	1	0	0	1	1	1	0	0	1	≥25	1	1	Male	40-59 years	Mexican American	High School	Married or living with a partner	4	Former	13440	High activity
70806	1	95	96.1	100	75	37	34	4	9.1	2.6	94	5.218	6.47	38.82	5.2	100	54	2.4	0.6	5.1	279	4.4	0	0.461	1957.5	2011-2012	117	82	0	0	0	0	1	1	0	0	0	≥25	0	0	Female	40-59 years	Non-Hispanic White	High School	Widowed/Divorced/Separated	3	Current	1200	Low activity
70807	2	102	91.6	70	8	17	19	4.2	9	3.2	92	5.107	11.93	71.58	5.2	84	50	3.5	0.6	5.7	273	2.5	0	0.158	1336.5	2011-2012	94.66666667	64	0	0	0	0	0	0	0	0	0	≥25	0	0	Female	20-39 years	Mexican American	High School	Never Married	3	Never	3040	Medium activity
70812	1	92	114.5	114	21	21	20	4.3	9.3	2.8	102	5.662	9.47	56.82	4.8	110	48	1.8	0.8	6.1	235	305	0	0.147	1782.5	2011-2012	148	88.66666667	0	0	0	0	1	1	0	0	0	≥25	0	0	Male	20-39 years	Non-Hispanic Black	High School	Never Married	4	Never	480	Low activity
70825	1	93	92.4	76	64	38	39	4.3	9	2.6	111	6.162	6.91	41.46	5.2	113	39	1.4	0.4	2.1	160	0.9	7	0.242	2161	2011-2012	120.6666667	79.33333333	0	0	0	0	0	0	0	0	0	≥25	0	0	Male	40-59 years	Non-Hispanic White	College or above	Widowed/Divorced/Separated	4	Never	880	Low activity
70832	1	99	87.8	35	10	18	22	4.5	9.3	2.6	83	4.607	6.03	36.18	5.1	57	61	1.4	0.4	2.3	158	2.9	0	0.314	1833.5	2011-2012	111.3333333	69.33333333	0	0	0	0	0	0	0	0	0	<25	0	0	Female	20-39 years	Non-Hispanic White	High School	Married or living with a partner	1	Current	1800	Medium activity
70871	1	99	110.5	441	43	35	31	4.2	9.1	2.8	116	6.439	19.97	119.82	5.4	130	34	2.6	0.5	4	291	5.4	33.5	0.0925	2792.5	2011-2012	116	66.66666667	0	0	0	1	1	1	0	1	0	≥25	1	1	Male	20-39 years	Non-Hispanic White	High School	Married or living with a partner	2	Current	12000	High activity
70912	2	93	140.1	152	10	17	19	4.1	9.1	2.6	101	5.607	78.27	469.62	5.4	150	45	1.1	0.5	5	136	21.4	0.35	0.097	3343.5	2011-2012	139	94	0	1	0	1	1	1	0	0	1	≥25	1	0	Male	60 and above years	Other Hispanic	College or above	Widowed/Divorced/Separated	4	Current	0	Inactive
70920	1	97	86.7	89	21	37	28	4.3	9.2	3.2	97	5.384	13.78	82.68	5.1	173	64	1.7	0.3	4.1	255	9.3	0	0.111	1675	2011-2012	109.3333333	70.66666667	0	0	0	0	0	0	0	0	0	<25	0	0	Female	40-59 years	Other Race-Including Multi-Racial	High School	Married or living with a partner	2	Never	180	Low activity
70929	1	92	82.8	64	8	15	15	4.3	8.8	2.9	85	4.718	7.82	46.92	5	94	52	1.9	0.3	2.9	189	7.9	0	0.0575	2368.5	2011-2012	100	51.33333333	0	0	0	0	0	0	0	0	0	<25	0	0	Female	20-39 years	Other Race-Including Multi-Racial	High School	Married or living with a partner	3	Never	3940	High activity
70932	1	90	73.6	59	10	16	21	4.8	9.4	2.4	101	5.607	9.44	56.64	5.5	68	70	0.9	0.2	2.1	227	66	7.55	0.197	2301	2011-2012	102.6666667	65.33333333	0	0	0	0	0	0	1	0	0	<25	0	0	Female	40-59 years	Other Race-Including Multi-Racial	College or above	Married or living with a partner	4	Never	640	Low activity
70935	1	99	91.8	91	17	22	27	4	9.5	3.2	92	5.107	6.32	37.92	5.8	115	63	1.7	0.2	1.9	303	6.6	0	0.0015	1269	2011-2012	114	79.33333333	0	0	0	0	0	0	0	0	0	<25	0	0	Female	40-59 years	Non-Hispanic Black	College or above	Married or living with a partner	4	Never	2400	Medium activity
70938	3	92	97.3	492	19	23	23	4.7	9.7	2.8	91	5.051	6.38	38.28	5.2	74	40	2.7	0.3	3.1	182	18.8	0	0.289	3541.5	2011-2012	106	67.33333333	0	0	0	0	1	1	0	0	0	≥25	0	0	Male	40-59 years	Mexican American	Middle school or lower	Widowed/Divorced/Separated	3	Current	3600	High activity
70941	2	100	92	69	23	18	22	4.3	9.4	3.3	99	5.495	5.42	32.52	5.3	0	47	2	0.7	3.7	208	4.8	0	NA	0	2011-2012	108	75.33333333	0	0	0	0	0	0	0	0	0	≥25	0	0	Male	40-59 years	Non-Hispanic White	High School	Married or living with a partner	3	Current	720	Low activity
70961	2	92	85.2	57	11	24	27	4.6	9.9	2.5	91	5.051	10.51	63.06	5.2	106	91	1.1	0.4	4.2	274	6.5	0	0.42	2715	2011-2012	101.3333333	64	0	0	0	0	0	0	0	0	0	<25	0	0	Female	60 and above years	Non-Hispanic White	College or above	Never Married	4	Current	360	Low activity
70966	3	91	76	82	7	12	14	5	9.4	2.6	97	5.384	6.87	41.22	4.8	0	49	1.5	0.5	3.4	208	6.2	0	0	2426	2011-2012	124.6666667	77.33333333	0	0	0	0	0	0	0	0	0	<25	0	0	Male	20-39 years	Other Race-Including Multi-Racial	High School	Married or living with a partner	1	Never	900	Low activity
70969	1	100	93.7	153	63	38	38	4	8.6	3.6	114	6.328	4.98	29.88	5.4	112	43	1.8	0.4	3.4	239	8.1	14.05	0.1375	2236	2011-2012	138	79.33333333	0	0	0	0	1	1	0	0	0	≥25	0	1	Male	40-59 years	Mexican American	High School	Married or living with a partner	1	Former	2000	Medium activity
70973	1	101	84.3	93	184	112	116	4.7	10.2	4.1	110	6.106	5.28	31.68	5.1	288	85	1.7	0.9	3.4	273	20.6	37	0.309	3113	2011-2012	122	81.33333333	1	0	0	0	0	0	0	1	0	<25	0	0	Male	20-39 years	Non-Hispanic White	High School	Widowed/Divorced/Separated	2	Never	29960	High activity
70974	1	101	129.4	165	21	36	24	4.4	9	2.4	101	5.607	17.18	103.08	5.6	128	40	2.3	0.5	5.4	239	5.2	5.6	0.041	3034	2011-2012	105.3333333	78.66666667	0	0	0	1	1	1	0	0	1	≥25	1	1	Male	40-59 years	Non-Hispanic White	High School	Married or living with a partner	2	Current	180	Low activity
70975	3	91	92.3	102	30	23	20	4.2	9.1	2.6	93	5.162	12.51	75.06	5.1	109	50	1.8	0.4	4	260	8.2	41	0.0785	1855.5	2011-2012	102.6666667	71.33333333	0	0	0	0	1	1	0	1	0	≥25	0	0	Female	20-39 years	Non-Hispanic White	College or above	Married or living with a partner	1	Never	1400	Low activity
70982	2	91	102.3	88	29	29	24	4.5	9.6	2.7	100	5.551	18.88	113.28	5.6	130	50	2.3	1	5.2	189	6.3	34.8	0.0905	3658.5	2011-2012	122	62.66666667	0	0	0	1	0	1	0	1	0	≥25	1	0	Male	40-59 years	Other Hispanic	Middle school or lower	Married or living with a partner	1	Never	0	Inactive
70995	1	95	144	69	12	18	17	4.1	8.8	3	118	6.55	37.65	225.9	6.5	277	37	2.9	0.9	6.5	395	30.8	0	0.16	2173.5	2011-2012	119.3333333	72	1	0	0	1	1	1	0	0	1	≥25	1	1	Female	20-39 years	Non-Hispanic White	Middle school or lower	Married or living with a partner	2	Current	0	Inactive
71042	1	102	86.7	96	46	74	44	4.4	9.5	3.5	101	5.607	11.88	71.28	5.4	119	40	2.2	0.7	2.9	220	9.4	0	0.1675	2823.5	2011-2012	116	62	0	0	0	0	0	0	0	0	0	<25	0	0	Male	20-39 years	Other Race-Including Multi-Racial	Middle school or lower	Married or living with a partner	1	Current	18720	High activity
71059	1	101	113.8	200	32	40	32	4.5	9.2	2.9	130	7.216	15.38	92.28	6.3	258	26	3.3	1.2	4.6	290	4.9	0	0.032	1536.5	2011-2012	149.3333333	97.33333333	1	0	0	1	1	1	0	0	1	≥25	1	1	Male	40-59 years	Non-Hispanic White	Middle school or lower	Married or living with a partner	1	Current	0	Inactive
71061	2	102	103.5	164	38	23	24	4	9.2	2.9	98	5.44	9.85	59.1	6	79	39	2	0.5	2.9	247	4.5	0	0.273	2792	2011-2012	120	77.33333333	0	0	0	1	1	1	0	0	1	≥25	1	1	Male	40-59 years	Mexican American	High School	Married or living with a partner	3	Never	20400	High activity
71066	1	93	84.4	139	10	12	32	4.3	9.1	3.1	100	5.551	8.05	48.3	5.9	176	63	1.8	0.4	3.2	295	4.9	0	0.1825	706	2011-2012	98	41.33333333	0	0	0	0	0	0	0	0	0	<25	0	0	Female	60 and above years	Other Hispanic	Middle school or lower	Never Married	3	Never	800	Low activity
71071	2	92	89	148	19	18	23	4	9.4	3	106	5.884	29.58	177.48	5.5	130	50	3.7	0.7	5.2	409	4.8	11.5	0.068	1913.5	2011-2012	110	90.66666667	0	0	0	1	0	1	0	0	1	≥25	1	1	Female	20-39 years	Other Race-Including Multi-Racial	College or above	Married or living with a partner	3	Never	4800	High activity
71084	3	92	103.7	132	43	46	31	4.6	9.2	2.6	115	6.384	10.75	64.5	5.4	134	53	2.5	0.9	7.5	237	31.5	0	0.493	1048	2011-2012	128	78.66666667	0	0	0	1	1	1	1	0	0	≥25	1	0	Male	40-59 years	Non-Hispanic White	High School	Widowed/Divorced/Separated	1	Current	8160	High activity
71107	2	94	79.9	73	12	23	25	4.3	9.4	2.7	86	4.774	3.59	21.54	4.9	78	52	2.5	0.4	3.2	291	11.2	0	0.3	2945	2011-2012	109.3333333	61.33333333	0	0	0	0	0	0	0	0	0	<25	0	0	Female	20-39 years	Non-Hispanic White	College or above	Widowed/Divorced/Separated	4	Current	11520	High activity
71117	2	97	77.7	29	17	14	23	4.4	9.4	2.7	97	5.384	2.17	13.02	5.7	36	50	2.1	0.6	4.8	178	8	0	0.164	2301	2011-2012	117.3333333	76	0	0	0	0	0	0	0	0	0	<25	0	0	Female	20-39 years	Non-Hispanic Black	High School	Never Married	1	Current	0	Inactive
71135	2	98	99.8	498	17	12	13	3.6	9.1	2.7	382	21.205	4.88	29.28	10.8	0	42	1.7	0.6	3.9	246	83.2	0	0.142	1187	2011-2012	155.3333333	60.66666667	1	0	0	0	1	1	0	0	0	≥25	0	1	Female	60 and above years	Non-Hispanic White	High School	Married or living with a partner	1	Never	0	Inactive
71136	1	95	85.5	70	18	32	32	4.5	9.4	2.5	96	5.329	6.54	39.24	5.1	97	51	1.6	0.4	4.4	220	10.8	0	0.0055	3650	2011-2012	112.6666667	64	0	0	0	0	0	0	0	0	0	<25	0	0	Male	20-39 years	Other Race-Including Multi-Racial	High School	Never Married	1	Never	2580	Medium activity
71159	3	92	80.3	38	12	22	27	4.3	9.3	2.6	85	4.718	5.73	34.38	5.4	79	90	1.5	0.6	5.7	199	2.1	0	0.119	1856	2011-2012	122	77.33333333	0	0	0	0	0	0	0	0	0	<25	0	0	Female	20-39 years	Non-Hispanic White	College or above	Married or living with a partner	4	Never	600	Low activity
71222	2	91	103.5	91	15	20	20	4.2	9.3	2.1	102	5.662	13.34	80.04	5.5	99	69	1.1	0.2	2.3	269	4.7	0	0.327	1730	2011-2012	114.6666667	74.66666667	0	0	0	0	0	0	0	0	0	≥25	0	0	Female	40-59 years	Non-Hispanic White	College or above	Married or living with a partner	4	Never	2400	Medium activity
71231	1	103	100.9	130	15	26	30	4.2	9.9	2.5	81	4.496	10.72	64.32	5.1	68	56	2.2	0.5	3.1	201	17.1	0	0.11	1416	2011-2012	117.3333333	74	0	0	0	0	0	0	0	0	0	≥25	0	0	Male	40-59 years	Non-Hispanic Black	High School	Widowed/Divorced/Separated	1	Never	0	Inactive
71240	1	93	107.5	77	117	20	36	4	9.4	3.3	112	6.217	5.55	33.3	4.8	109	53	0.9	0.8	3.8	138	72.6	0	0.0425	1986.5	2011-2012	112.6666667	46	0	1	1	1	1	1	0	0	1	≥25	1	1	Male	60 and above years	Non-Hispanic White	College or above	Widowed/Divorced/Separated	1	Current	0	Inactive
71250	2	101	96.6	72	18	19	20	3.8	9.2	3.3	97	5.384	6.15	36.9	5.7	174	41	2.8	0.3	7.7	321	2.5	0	1.2625	3467	2011-2012	132.6666667	81.33333333	0	0	0	0	0	0	0	0	0	<25	0	0	Male	20-39 years	Non-Hispanic White	Middle school or lower	Married or living with a partner	1	Current	7680	High activity
71302	2	93	102.1	99	12	12	15	4.1	9.4	3.5	109	6.051	12.67	76.02	6.2	0	52	1.6	0.6	4.1	246	8.2	3.4	0.0335	2298.5	2011-2012	143	82	1	0	0	0	0	0	0	0	0	≥25	0	1	Female	40-59 years	Non-Hispanic Black	High School	Widowed/Divorced/Separated	2	Never	2100	Medium activity
71307	2	91	112.4	106	23	26	29	4.4	9.4	2.4	100	5.551	15.76	94.56	5.2	113	40	1.2	0.3	2.9	247	6.8	0	0.011	2432	2011-2012	108	62.66666667	0	0	0	1	1	1	0	0	1	≥25	1	0	Male	40-59 years	Non-Hispanic White	High School	Widowed/Divorced/Separated	2	Never	1680	Low activity
71310	2	96	124.2	73	23	34	23	3.8	9.2	3.2	145	8.049	20.37	122.22	6.6	268	59	2.7	0.5	4.7	205	12.9	0	0.0285	1495.5	2011-2012	116.6666667	70.66666667	1	1	0	1	1	1	0	0	1	≥25	1	1	Female	60 and above years	Non-Hispanic Black	High School	Widowed/Divorced/Separated	2	Never	0	Inactive
71315	1	98	147.2	144	31	45	26	4	9	2.5	107	5.94	29.92	179.52	5.7	146	40	1.6	0.6	3.9	174	5.2	0	0.1195	4317	2011-2012	134	86	0	0	0	1	1	1	0	0	1	≥25	1	0	Male	40-59 years	Non-Hispanic White	Middle school or lower	Married or living with a partner	2	Current	0	Inactive
71316	2	100	91.6	115	13	17	22	4.5	9.3	2.6	108	5.995	2.97	17.82	5.6	89	44	3.3	0.6	5.8	264	5.4	0	0.904	3250.5	2011-2012	113.3333333	65.33333333	0	0	0	0	0	0	0	0	0	<25	0	0	Male	40-59 years	Other Race-Including Multi-Racial	Middle school or lower	Married or living with a partner	3	Current	23700	High activity
71359	2	94	100	279	47	34	28	4.2	9.2	2.8	97	5.384	27.13	162.78	5.7	0	35	1.9	0.6	3.4	174	3.5	0	0.148	2093	2011-2012	112	66.66666667	0	0	0	1	1	1	0	0	1	≥25	1	0	Male	40-59 years	Other Hispanic	Middle school or lower	Married or living with a partner	1	Never	120	Low activity
71368	1	90	81.5	72	24	19	24	5.4	10.2	2.9	100	5.551	4.18	25.08	4.5	87	50	1.7	0.2	3.6	237	1.3	5.3	0.047	2225.5	2011-2012	131.3333333	82	0	0	0	0	0	0	0	0	0	<25	0	0	Male	20-39 years	Non-Hispanic White	Middle school or lower	Married or living with a partner	3	Current	1380	Low activity
71473	2	98	100.4	97	24	24	25	4.2	9.4	3.1	141	7.827	15.38	92.28	7	0	62	1.8	0.3	3.7	234	6.5	0	0.088	1717.5	2011-2012	122	84	1	0	0	0	0	0	0	0	0	≥25	0	0	Female	20-39 years	Non-Hispanic Black	College or above	Never Married	4	Never	80	Low activity
71522	1	95	109.5	240	17	15	18	3.9	9.6	2.5	208	11.546	3.85	23.1	7.7	0	37	1.1	0.7	5.4	132	3.1	0	0.629	3436.5	2011-2012	140.6666667	64.66666667	1	1	0	0	1	1	0	0	0	≥25	0	1	Female	60 and above years	Non-Hispanic White	High School	Married or living with a partner	2	Current	2880	Medium activity
71559	2	90	101.1	108	9	17	20	4	9.6	3.2	131	7.272	11.2	67.2	6.3	0	53	2.4	0.3	3.6	231	2.4	0	0.041	940	2011-2012	134.6666667	55.33333333	1	0	0	0	0	0	0	0	0	≥25	0	1	Female	40-59 years	Other Hispanic	Middle school or lower	Never Married	1	Never	2400	Medium activity
71584	1	100	104	50	18	17	20	4.3	9.5	3.6	102	5.662	16.07	96.42	5.3	110	75	2.9	0.3	5.3	252	24.6	0	0	951.5	2011-2012	164	73.33333333	0	0	0	0	0	0	0	0	0	≥25	0	0	Female	40-59 years	Non-Hispanic Black	High School	Married or living with a partner	4	Never	600	Low activity
71640	1	99	98.3	60	76	22	21	4	9.1	2.9	86	4.774	3.82	22.92	5.3	60	59	1.6	0.6	3.1	307	0.7	0	0.2665	2000.5	2011-2012	112	60	0	0	0	0	1	1	0	0	0	≥25	0	0	Female	40-59 years	Non-Hispanic Black	College or above	Married or living with a partner	4	Never	0	Inactive
71675	3	91	96.7	90	15	30	26	4.1	9.2	3.4	107	5.94	16.04	96.24	5.9	121	51	2.5	0.9	5.3	264	1.9	10.7	0.102	1356.5	2011-2012	139.3333333	52.66666667	0	0	0	1	0	1	0	0	1	≥25	1	0	Female	60 and above years	Non-Hispanic White	High School	Married or living with a partner	3	Never	9600	High activity
71697	1	101	99.6	75	19	22	27	3.6	9.1	3.4	99	5.495	9.26	55.56	5.9	135	49	1.9	0.7	3.1	183	6.6	0	0.2055	1591	2011-2012	146	76.66666667	0	0	0	0	0	0	0	0	0	≥25	0	0	Male	60 and above years	Non-Hispanic White	Middle school or lower	Married or living with a partner	2	Current	167664	High activity
71710	1	96	94.5	83	22	12	16	4.5	9.7	2.6	106	5.884	8.43	50.58	5.9	151	39	1.6	0.3	2.5	242	8.5	0	0.0925	2484.5	2011-2012	140	89.33333333	0	0	0	0	0	0	1	0	0	<25	0	0	Male	60 and above years	Non-Hispanic Black	High School	Married or living with a partner	4	Current	1020	Low activity
71724	2	102	97	78	107	28	27	4	9.3	3	96	5.329	8.09	48.54	5.4	97	40	1.5	0.5	2.1	191	2.3	0	0.162	4076	2011-2012	116	77.33333333	0	0	0	1	1	1	1	0	0	≥25	1	0	Male	40-59 years	Other Hispanic	Middle school or lower	Widowed/Divorced/Separated	2	Current	3840	High activity
71739	2	91	91.5	135	27	21	22	4.7	10	2.8	121	6.717	6.76	40.56	7.7	0	33	2.1	0.8	4.2	147	42	0	0.14	1341.5	2011-2012	158	67.33333333	1	1	0	0	0	0	0	0	0	≥25	0	1	Male	60 and above years	Non-Hispanic White	High School	Married or living with a partner	1	Current	13440	High activity
71740	2	99	71.4	42	25	17	17	4.1	9.1	2.8	89	4.94	8.41	50.46	5.4	90	61	2.5	0.4	1.8	218	7.7	0.3	0.003	2758	2011-2012	105.3333333	69.33333333	0	0	0	0	0	0	0	0	0	<25	0	0	Female	20-39 years	Non-Hispanic Black	High School	Never Married	1	Never	5760	High activity
71750	2	92	72.3	57	9	15	21	4.5	9.6	2.7	100	5.551	4.6	27.6	5.8	88	83	2.3	0.9	3	202	3.6	0	0	2410	2011-2012	123	64	0	0	0	0	0	0	0	0	0	<25	0	0	Female	60 and above years	Non-Hispanic White	College or above	Widowed/Divorced/Separated	2	Never	2320	Medium activity
71757	1	101	86.3	220	18	35	22	4.4	9.4	3.5	100	5.551	18.55	111.3	5.4	112	37	2.1	0.6	3.4	307	1	7	0.0535	1746.5	2011-2012	118	67.33333333	0	0	0	0	0	0	0	0	0	<25	0	0	Male	20-39 years	Other Race-Including Multi-Racial	College or above	Never Married	4	Never	1440	Low activity
71803	2	96	107.2	80	40	25	24	4.4	10.1	3	84	4.663	21.02	126.12	6	117	51	1.5	0.4	4.6	251	57.5	0	0.012	1682	2011-2012	156	82.66666667	0	0	0	1	1	1	0	0	1	≥25	1	0	Female	40-59 years	Non-Hispanic Black	High School	Widowed/Divorced/Separated	1	Never	4800	High activity
71813	1	90	104	109	20	26	20	4.5	9.4	3.2	101	5.607	21.27	127.62	5.5	110	40	1.8	0.3	2.9	216	4.7	0	0.125	1332	2011-2012	119.3333333	78.66666667	0	0	0	1	1	1	0	0	1	≥25	1	0	Male	20-39 years	Other Race-Including Multi-Racial	College or above	Married or living with a partner	4	Never	2040	Medium activity
71830	1	100	109	159	17	29	21	4.2	9.2	3	100	5.551	30.72	184.32	5.5	123	44	2.4	0.5	4.1	292	19.8	0	0.0965	1733.5	2011-2012	106.6666667	56	0	0	0	1	1	1	0	0	1	≥25	1	1	Female	20-39 years	Mexican American	High School	Married or living with a partner	1	Current	0	Inactive
71839	1	95	142.7	399	30	48	51	3.5	8.5	2.7	292	16.209	25.72	154.32	10.6	0	31	3.8	0.7	3.6	303	3.7	0	0.073	2009	2011-2012	114	71.33333333	1	0	0	1	1	1	0	0	1	≥25	1	1	Female	40-59 years	Non-Hispanic White	College or above	Never Married	2	Never	6720	High activity
71849	2	90	91.2	31	11	14	20	4.2	9.6	2.9	95	5.273	6.19	37.14	5.6	95	75	1.4	0.4	2.5	351	1.3	0	0.102	1262	2011-2012	132	74.66666667	0	0	0	0	0	0	0	0	0	≥25	0	0	Female	40-59 years	Other Hispanic	High School	Widowed/Divorced/Separated	2	Never	16760	High activity
71868	3	92	96.4	46	11	16	16	4.4	8.9	2.8	112	6.217	5.45	32.7	5.6	87	47	2	0.4	3.5	125	1.2	86.35	0.1015	5030.5	2011-2012	112	74.66666667	0	0	0	0	0	0	0	1	0	≥25	0	0	Male	40-59 years	Mexican American	High School	Married or living with a partner	3	Current	0	Inactive
71886	2	99	98.2	44	12	12	17	4	9.2	2.9	95	5.273	4.55	27.3	5.7	89	61	1.5	0.4	1.7	204	7.1	0	0.0335	1410.5	2011-2012	113.3333333	77.33333333	0	0	0	0	0	0	0	0	0	≥25	0	0	Male	60 and above years	Non-Hispanic Black	High School	Never Married	3	Never	3360	Medium activity
71891	2	102	96	137	17	22	23	4.2	9.3	3.2	96	5.329	6.14	36.84	5.6	120	65	1.6	0.4	1.7	287	6.9	0	0.014	2346	2011-2012	103.3333333	42	0	0	0	0	0	0	0	0	0	≥25	0	0	Female	40-59 years	Mexican American	High School	Married or living with a partner	3	Never	0	Inactive
73559	1	109	109.2	51	13	16	22	3.7	8.9	2.2	193	10.713	5.83	34.98	8.9	0	60	1	0.8	4.9	237	11.9	0	0.0545	1845	2013-2014	142	82	1	0	0	0	0	0	0	0	0	≥25	0	1	Male	60 and above years	Non-Hispanic White	High School	Married or living with a partner	4	Current	1560	Low activity
73581	2	106	99.3	107	20	20	26	4.3	9.2	3.1	110	6.106	6.08	36.48	5	100	78	1.4	0.3	2.7	172	10.2	0	0.021	2492	2013-2014	133.3333333	79.33333333	0	0	0	0	0	0	0	0	0	<25	0	0	Male	40-59 years	Other Race-Including Multi-Racial	College or above	Married or living with a partner	4	Never	1920	Medium activity
73596	2	106	117.8	104	17	73	50	4.1	9.3	3	107	5.94	20.93	125.58	5.9	164	56	2.5	0.5	4.9	267	18.2	0	0.0565	2604.5	2013-2014	128.6666667	73.33333333	0	0	0	1	1	1	0	0	1	≥25	1	0	Female	40-59 years	Other Race-Including Multi-Racial	College or above	Married or living with a partner	4	Current	160	Low activity
73638	1	115	98	110	15	13	14	4	9.5	3.4	114	6.328	5.91	35.46	6	0	47	2.7	0.7	7.8	208	29.2	0	0.5105	901	2013-2014	140	33.33333333	1	0	0	0	0	0	0	0	0	<25	0	1	Female	60 and above years	Other Race-Including Multi-Racial	High School	Widowed/Divorced/Separated	3	Current	1920	Medium activity
73640	2	116	81.5	79	12	11	21	4.7	10	3.1	114	6.328	10.09	60.54	4.9	150	58	3.3	0.6	4.7	330	30	0	0.1305	2374	2013-2014	134	71.33333333	0	0	0	0	0	0	0	0	0	<25	0	0	Female	60 and above years	Non-Hispanic Black	High School	Widowed/Divorced/Separated	3	Never	4080	High activity
73659	1	117	125	152	19	37	27	4.2	9.2	2.8	139	7.716	42.67	256.02	5.9	154	54	3.2	0.6	5.5	345	28.8	0	0	748.5	2013-2014	149	73	1	0	0	1	1	1	0	0	1	≥25	1	1	Female	60 and above years	Non-Hispanic White	High School	Widowed/Divorced/Separated	2	Never	0	Inactive
73661	2	114	73.2	45	13	18	21	4.6	9.9	3.2	86	4.774	4.47	26.82	5.5	84	44	1.8	0.4	1.7	203	5.6	0	0.094	2669	2013-2014	110	52	0	0	0	0	0	0	0	0	0	<25	0	0	Male	20-39 years	Non-Hispanic Black	High School	Never Married	2	Never	3000	Medium activity
73690	1	114	85.2	108	15	15	32	4.5	9.8	2.9	90	4.996	3.47	20.82	5.8	76	87	1	0.4	2.4	199	13.9	0	0.0725	1985.5	2013-2014	167.3333333	66.66666667	0	0	1	0	0	0	0	0	0	<25	0	0	Female	60 and above years	Non-Hispanic White	High School	Married or living with a partner	3	Never	1320	Low activity
73706	1	106	113.1	196	22	25	21	4.1	9.5	2.4	184	10.214	14.21	85.26	7.6	0	41	2.6	0.9	6.7	151	29	5.6	0.1465	2837	2013-2014	138	78.66666667	1	0	0	1	1	1	0	0	1	≥25	1	1	Male	40-59 years	Non-Hispanic White	High School	Married or living with a partner	2	Current	20040	High activity
73729	1	105	123.6	131	35	32	26	4.2	9.4	2.4	96	5.329	12.36	74.16	5.4	184	44	2.4	0.6	5.4	230	9.2	0	0.328	1520	2013-2014	118	58.66666667	0	0	0	1	1	1	0	0	1	≥25	1	0	Male	40-59 years	Non-Hispanic White	High School	Married or living with a partner	3	Current	0	Inactive
73730	1	106	103.2	125	20	22	22	4.3	9.2	2.8	105	5.829	11.73	70.38	5.5	79	40	1.6	0.5	10.4	180	1.2	42.1	0.0985	3895.5	2013-2014	114.6666667	70.66666667	0	0	0	1	0	1	0	1	0	≥25	1	0	Male	40-59 years	Mexican American	High School	Never Married	2	Current	0	Inactive
73739	1	108	96.7	38	9	16	16	4.4	9.1	2.2	90	4.996	8.12	48.72	5	93	61	1.7	0.4	2.7	203	2.7	28.05	0.153	2162	2013-2014	112	70	0	0	0	0	0	0	0	1	0	≥25	0	0	Female	40-59 years	Non-Hispanic White	High School	Married or living with a partner	2	Current	0	Inactive
73757	1	111	125.3	72	14	11	21	4.2	9.4	3.2	88	4.885	19.2	115.2	5.4	78	54	1.8	0.5	5.6	273	6.8	6.2	0.203	2777.5	2013-2014	96.66666667	62	0	0	0	1	1	1	0	0	1	≥25	1	0	Female	20-39 years	Mexican American	College or above	Never Married	4	Never	2400	Medium activity
73767	2	104	73.5	71	13	10	15	4.2	9.3	2.8	93	5.162	3.24	19.44	5.4	86	57	1.6	0.2	2.3	198	5.7	0	0.1215	1778.5	2013-2014	100.6666667	65.33333333	0	0	0	0	0	0	0	0	0	<25	0	0	Female	20-39 years	Other Race-Including Multi-Racial	College or above	Married or living with a partner	4	Never	720	Low activity
73807	1	110	84.6	102	5	24	24	4.5	9.6	2.7	107	5.94	8.37	50.22	5.6	109	53	2.3	0.4	3.9	198	4.4	0	0.141	2178	2013-2014	116	62.66666667	0	0	0	0	0	0	0	0	0	≥25	0	0	Female	40-59 years	Non-Hispanic White	High School	Married or living with a partner	4	Never	0	Inactive
73813	2	116	80.5	71	8	14	26	4.4	9.4	3.1	87	4.829	4.72	28.32	5.1	155	44	2.4	0.6	5.5	321	9.6	0	0	456	2013-2014	106.6666667	59.33333333	0	0	0	0	0	0	0	0	0	≥25	0	0	Female	20-39 years	Non-Hispanic White	High School	Married or living with a partner	3	Never	480	Low activity
73815	1	112	94	150	16	21	25	4.1	9.7	3.2	86	4.774	10.7	64.2	5.3	86	55	1.4	0.4	1.8	149	14.6	9.55	0.0965	1772	2013-2014	133.3333333	50	0	0	0	0	0	0	0	0	0	≥25	0	0	Female	60 and above years	Non-Hispanic Black	High School	Married or living with a partner	3	Current	0	Inactive
73816	1	108	100.8	138	22	25	19	4.5	9.2	2.8	129	7.161	15.49	92.94	6.4	203	55	2.1	0.5	3.9	239	6.4	10.5	0.002	1326.5	2013-2014	134.6666667	66	1	0	0	1	0	1	0	0	1	≥25	1	0	Male	60 and above years	Other Hispanic	High School	Married or living with a partner	2	Current	1200	Low activity
73837	2	107	104.2	68	5	19	17	4.2	8.9	2.4	79	4.385	4.77	28.62	5.3	55	38	2.3	0.6	3.3	221	7.8	0	5.00E-04	3323.5	2013-2014	101.3333333	63.33333333	0	0	0	0	0	0	0	0	0	≥25	0	0	Male	20-39 years	Non-Hispanic White	High School	Married or living with a partner	3	Never	960	Low activity
73839	2	108	116.6	159	15	22	20	4.5	9.8	2.8	212	11.768	18.11	108.66	8.4	0	41	3.1	0.8	5.8	211	34.2	0	0.242	1480	2013-2014	136	57.33333333	1	0	0	1	1	1	0	0	1	≥25	1	1	Male	60 and above years	Non-Hispanic White	High School	Married or living with a partner	3	Never	3600	High activity
73860	1	112	88.3	46	29	18	22	4.7	9.9	2.4	103	5.718	2.7	16.2	5.7	113	91	NA	NA	NA	240	13.6	28.1	0.262	2941	2013-2014	152	90	0	0	0	0	0	0	0	0	0	<25	0	0	Male	40-59 years	Non-Hispanic Black	Middle school or lower	Widowed/Divorced/Separated	3	Current	14400	High activity
73880	2	105	119	160	24	28	19	4.2	9.8	2.8	184	10.214	23.7	142.2	8.2	0	43	2.7	0.4	4.6	210	13.4	0	0.1105	992	2013-2014	125.3333333	88.66666667	1	0	0	1	1	1	0	0	1	≥25	1	1	Female	40-59 years	Non-Hispanic White	High School	Widowed/Divorced/Separated	2	Current	9600	High activity
73910	2	104	85	118	12	15	23	4.5	9.2	2.9	99	5.495	3.81	22.86	5.6	96	55	1.6	0.3	2.9	171	16.2	0	NA	0	2013-2014	116	72.66666667	0	0	0	0	0	0	0	0	0	<25	0	0	Male	40-59 years	Other Race-Including Multi-Racial	College or above	Married or living with a partner	4	Never	1040	Low activity
73928	1	115	103	84	21	28	20	4.5	9.7	2.7	90	4.996	22.89	137.34	5.4	0	50	2.1	0.6	2.9	223	14.6	0	NA	0	2013-2014	123.3333333	73.33333333	0	0	0	0	1	1	0	0	0	≥25	0	0	Male	20-39 years	Non-Hispanic Black	High School	Never Married	4	Never	4560	High activity
73977	2	106	90.9	73	19	30	29	4.6	9.9	2.9	85	4.718	4.54	27.24	5.3	155	55	1.3	0.4	2.7	214	12	0	0.001	2483.5	2013-2014	106.6666667	70	0	0	0	0	0	0	0	0	0	<25	0	0	Male	20-39 years	Other Race-Including Multi-Racial	College or above	Never Married	4	Current	240	Low activity
73979	2	105	86.7	71	21	33	33	4.5	10.2	2.7	102	5.662	15.77	94.62	5.9	0	106	1.6	0.4	2.4	188	15	9.6	0.2155	1244	2013-2014	121.3333333	72.66666667	0	0	0	0	0	0	0	0	0	≥25	0	0	Female	60 and above years	Non-Hispanic White	High School	Married or living with a partner	4	Never	800	Low activity
74065	1	104	84.5	106	22	21	26	4.3	9.4	2.2	106	5.884	9.11	54.66	5.5	103	81	1.6	0.4	2.3	206	8	42.9	0.221	2313	2013-2014	162.6666667	56.66666667	0	0	0	0	0	0	0	1	0	<25	0	0	Female	60 and above years	Non-Hispanic White	College or above	Widowed/Divorced/Separated	3	Never	1320	Low activity
74072	2	111	95.4	105	42	26	35	4.2	9.3	2.9	97	5.384	6.55	39.3	5.6	68	50	0.9	0.8	4	123	4.8	33.4	0.229	2478	2013-2014	134	66.66666667	0	0	1	0	0	0	0	1	0	<25	0	0	Male	60 and above years	Non-Hispanic Black	High School	Widowed/Divorced/Separated	2	Current	1960	Medium activity
74078	2	107	87.1	84	17	18	21	4.3	9.2	2.6	99	5.495	6	36	5.5	119	50	1.6	0.6	3.1	162	1.4	0	0.038	1674.5	2013-2014	122	82	0	0	0	0	0	0	0	0	0	<25	0	0	Male	60 and above years	Non-Hispanic White	High School	Married or living with a partner	4	Never	7020	High activity
74085	2	105	99.1	82	29	31	26	4	9	2.5	111	6.162	5.41	32.46	5.9	0	76	1.5	0.9	5.6	178	5.1	0	0.0045	2397	2013-2014	130	70.66666667	0	1	0	0	1	1	0	0	0	≥25	0	1	Female	60 and above years	Non-Hispanic White	High School	Widowed/Divorced/Separated	2	Never	0	Inactive
74110	1	106	91	114	22	41	38	4.4	9.2	3.6	97	5.384	6.41	38.46	5.6	108	43	2.4	0.9	4.1	229	7.4	0	0.0025	2524	2013-2014	137.3333333	87.33333333	0	0	0	0	0	0	0	0	0	<25	0	0	Male	60 and above years	Other Hispanic	High School	Married or living with a partner	2	Current	0	Inactive
74112	2	113	125.9	68	16	14	15	3.8	9.1	2.7	101	5.607	14.46	86.76	5.2	0	59	2	0.4	4	298	10.3	0	NA	0	2013-2014	116	80	0	0	0	1	1	1	0	0	1	≥25	1	0	Female	20-39 years	Other Hispanic	High School	Married or living with a partner	1	Never	1440	Low activity
74119	1	110	107	231	49	18	16	4	9.2	2.9	98	5.44	16.55	99.3	5.1	92	59	2.2	0.3	4.4	208	3.1	6.15	0.0855	1479	2013-2014	116.6666667	75.33333333	0	0	0	1	1	1	0	0	1	≥25	1	0	Female	20-39 years	Mexican American	Middle school or lower	Married or living with a partner	2	Never	2400	Medium activity
74120	2	109	108.9	313	18	24	25	4.1	9.3	2.7	119	6.606	16.36	98.16	5.9	201	35	3.2	0.7	4.3	252	14.4	0	0.006	1512.5	2013-2014	127.3333333	77.33333333	1	0	0	1	1	1	0	0	1	≥25	1	1	Male	60 and above years	Non-Hispanic White	High School	Married or living with a partner	2	Never	600	Low activity
74124	1	106	86.3	111	10	12	18	4	9.2	3.4	90	4.996	12.39	74.34	5.2	134	70	1.9	0.3	2.4	243	7.2	0	0.226	1601	2013-2014	114	54	0	0	0	0	0	0	0	0	0	<25	0	0	Female	20-39 years	Other Hispanic	High School	Widowed/Divorced/Separated	2	Never	2160	Medium activity
74154	1	115	121.7	50	13	13	14	3.8	9.3	3.8	97	5.384	9.84	59.04	5.4	120	76	1.9	0.6	1.8	235	3.3	0	0	1265.5	2013-2014	145.3333333	72.66666667	0	0	0	0	1	1	0	0	0	≥25	0	0	Female	40-59 years	Non-Hispanic Black	High School	Married or living with a partner	3	Current	10140	High activity
74159	2	116	98.8	199	56	40	27	4.2	10.5	4.7	104	5.773	16.22	97.32	5.6	71	40	4.3	0.5	3.9	178	21.6	59.25	0	2187.5	2013-2014	128.6666667	90	0	0	0	0	1	1	0	1	0	≥25	0	0	Male	20-39 years	Non-Hispanic Black	College or above	Never Married	4	Current	2040	Medium activity
74176	2	117	80.1	102	75	47	30	4.4	10.2	3	105	5.829	7.61	45.66	5.3	131	86	2.1	0.3	1.6	329	5.8	0	NA	0	2013-2014	128.6666667	85.33333333	0	0	0	0	0	0	0	0	0	<25	0	0	Female	40-59 years	Other Race-Including Multi-Racial	Middle school or lower	Married or living with a partner	1	Never	2880	Medium activity
74207	1	110	103	68	7	24	23	4.3	10.3	3.3	80	4.441	3.37	20.22	5.1	108	78	1.9	0.6	3	247	12.6	0	0.36	1646	2013-2014	118	64	0	0	0	0	0	0	0	0	0	≥25	0	0	Female	20-39 years	Non-Hispanic White	College or above	Married or living with a partner	3	Never	1800	Medium activity
74214	1	107	92.5	184	27	23	20	4.7	9.6	2.3	108	5.995	19.94	119.64	6.7	0	43	1.4	0.5	3.2	245	18.5	0	0.057	2255.5	2013-2014	112	63	1	0	0	1	1	1	0	0	1	≥25	1	1	Female	40-59 years	Other Hispanic	College or above	Married or living with a partner	4	Never	240	Low activity
74235	1	110	120.8	643	9	12	16	3.9	9.1	2.3	103	5.718	20.82	124.92	5.2	62	27	3.8	0.7	6.7	295	14.7	56.85	0.0015	1997.5	2013-2014	105.3333333	66.66666667	0	0	0	1	1	1	0	1	0	≥25	1	1	Female	20-39 years	Mexican American	High School	Married or living with a partner	2	Current	0	Inactive
74237	1	111	150.3	86	11	10	14	3.6	9.5	3.1	99	5.495	16.72	100.32	5.7	178	53	3.3	0.7	8.8	377	3.5	0	NA	0	2013-2014	121.3333333	70.66666667	0	0	0	1	1	1	0	0	1	≥25	1	0	Female	40-59 years	Non-Hispanic White	College or above	Widowed/Divorced/Separated	4	Current	0	Inactive
74239	1	110	85.3	316	11	14	18	4.2	14.8	3.1	91	5.051	11.56	69.36	4.7	130	56	2.2	0.5	4.6	188	28.8	5.35	0.074	1428.5	2013-2014	115.3333333	77.33333333	0	0	0	0	0	0	0	0	0	<25	0	0	Female	20-39 years	Non-Hispanic White	College or above	Married or living with a partner	4	Never	0	Inactive
74275	2	117	71.4	28	9	13	16	4.2	9.2	2.3	87	4.829	3.77	22.62	5	44	76	2.2	0.4	4.9	244	2.9	17.5	0.425	2618	2013-2014	94	54	0	0	0	0	0	0	0	0	0	<25	0	0	Female	20-39 years	Other Race-Including Multi-Racial	College or above	Never Married	1	Never	4200	High activity
74276	1	109	121.9	127	24	20	21	4.4	9.7	2.7	95	5.273	41.82	250.92	5.7	94	48	2.4	0.6	3.9	275	5.9	0	0.0755	1802	2013-2014	112	44.66666667	0	0	0	1	1	1	1	0	0	≥25	1	1	Female	60 and above years	Mexican American	Middle school or lower	Married or living with a partner	1	Current	480	Low activity
74295	2	104	84.6	76	11	18	20	4.5	9.7	2.5	95	5.273	2.71	16.26	5	81	36	1.6	0.4	3	235	1.2	0	0.002	3022	2013-2014	114	72	0	0	0	0	0	0	0	0	0	<25	0	0	Male	20-39 years	Other Race-Including Multi-Racial	College or above	Never Married	3	Never	5520	High activity
74298	2	114	97.5	154	16	17	22	4	9.2	2.7	85	4.718	6.43	38.58	4.9	141	32	1.7	0.6	2.4	170	11.2	0	0.238	1565	2013-2014	167.3333333	68.66666667	0	0	0	0	0	0	0	0	0	≥25	0	1	Female	60 and above years	Non-Hispanic White	High School	Married or living with a partner	2	Current	0	Inactive
74301	1	112	107.6	125	9	20	15	3.9	9.3	3.2	96	5.329	9.35	56.1	5.6	94	51	NA	NA	NA	245	2.8	0	0.1555	1281	2013-2014	110	66.66666667	0	0	0	0	1	1	0	0	0	≥25	0	0	Female	40-59 years	Non-Hispanic White	College or above	Never Married	4	Current	2160	Medium activity
74302	1	106	130.2	386	29	19	20	4.4	9.7	2.6	105	5.829	12.91	77.46	6.2	0	48	3.3	0.8	5.8	194	4.3	0	0.8185	2198	2013-2014	138	73.33333333	1	1	0	1	1	1	0	0	1	≥25	1	1	Male	60 and above years	Other Hispanic	High School	Married or living with a partner	2	Current	2400	Medium activity
74304	2	105	118	100	15	19	21	4	8.9	3.4	125	6.939	13.59	81.54	6.7	175	39	1	0.6	5.5	174	66	11.2	0.162	1435.5	2013-2014	118.6666667	71.33333333	1	1	0	1	1	1	0	0	1	≥25	1	1	Male	60 and above years	Non-Hispanic White	High School	Married or living with a partner	1	Never	7680	High activity
74312	1	115	75.5	108	13	22	21	5.1	10.2	2.1	96	5.329	5.36	32.16	5.1	139	46	2.4	0.3	3.8	170	11.4	0	0.0375	2289	2013-2014	125.3333333	67.33333333	0	0	0	0	0	0	0	0	0	<25	0	0	Male	20-39 years	Non-Hispanic White	College or above	Never Married	1	Never	4320	High activity
74319	2	112	72.2	42	17	22	26	4.5	9.7	2.4	99	5.495	2.28	13.68	6	130	82	1.4	0.4	2.1	170	385	0	0.1755	1696.5	2013-2014	136	81.33333333	0	0	0	0	0	0	0	0	0	<25	0	0	Female	60 and above years	Other Race-Including Multi-Racial	College or above	Widowed/Divorced/Separated	1	Never	1680	Low activity
74324	1	117	129.2	136	32	47	37	4	8.8	3	125	6.939	38.43	230.58	6.1	185	56	3.7	0.6	6.9	361	19.2	0	0.1255	1849.5	2013-2014	145	72	0	0	0	1	1	1	0	0	1	≥25	1	1	Female	60 and above years	Non-Hispanic White	High School	Widowed/Divorced/Separated	2	Current	0	Inactive
74331	1	116	123.4	64	38	44	25	4.5	9.8	2.8	96	5.329	11.06	66.36	5.5	108	50	2.3	0.9	2.8	203	10.9	0	0.205	4082.5	2013-2014	139.3333333	91.33333333	0	0	0	0	1	1	0	0	0	≥25	0	0	Male	20-39 years	Non-Hispanic Black	High School	Married or living with a partner	2	Never	0	Inactive
74338	2	115	98.3	126	13	28	30	4.4	9.3	3	81	4.496	7.78	46.68	5.1	67	57	1.6	0.5	3	215	1.8	0	0.058	1739	2013-2014	104.6666667	73.33333333	0	0	0	0	0	0	0	0	0	≥25	0	0	Male	40-59 years	Non-Hispanic White	College or above	Widowed/Divorced/Separated	4	Never	3360	Medium activity
74346	1	112	97.5	186	40	43	32	4.1	9.4	2.7	104	5.773	21.27	127.62	5.8	124	29	NA	NA	NA	217	9.2	0	0.053	2028	2013-2014	122	48	0	0	0	1	1	1	0	0	1	≥25	1	1	Male	60 and above years	Non-Hispanic White	College or above	Married or living with a partner	3	Never	3360	Medium activity
74348	1	115	92.2	55	21	11	22	3.9	8.7	2.9	97	5.384	6.17	37.02	6	97	58	1.4	0.6	2.6	367	15.6	14.9	0.264	2171	2013-2014	142	86	0	0	0	0	0	0	0	0	0	≥25	0	0	Female	40-59 years	Non-Hispanic Black	High School	Married or living with a partner	3	Never	10280	High activity
74374	1	108	86.7	44	9	19	23	4.1	8.8	3.3	105	5.829	3.13	18.78	6.3	0	68	0.9	0.4	3.7	148	6.1	5.4	0.07	1003.5	2013-2014	128	81.33333333	1	1	0	0	0	0	0	0	0	<25	0	0	Female	60 and above years	Other Race-Including Multi-Racial	High School	Married or living with a partner	3	Never	840	Low activity
74378	1	107	106.9	247	90	76	29	4.5	9.6	3.8	96	5.329	66.24	397.44	5.3	102	42	3.5	0.7	6.8	406	245	50.4	0.148	3256	2013-2014	120	73	0	0	0	1	1	1	0	1	0	≥25	1	0	Male	20-39 years	Other Hispanic	High School	Married or living with a partner	2	Never	13920	High activity
74395	1	117	124.8	72	20	18	20	4	10.4	3.5	117	6.495	20.85	125.1	6	147	62	2.4	1	8.1	262	12.1	0	0	1878	2013-2014	104	59.33333333	0	1	0	1	1	1	0	0	1	≥25	1	1	Male	60 and above years	Non-Hispanic White	High School	Widowed/Divorced/Separated	2	Current	0	Inactive
74417	2	116	129	33	21	9	21	3.7	9.1	3.4	86	4.774	4.86	29.16	5.5	51	89	4.3	0.2	1.7	304	66	0	0.072	1715.5	2013-2014	136	52	0	1	0	0	1	1	0	0	0	≥25	0	0	Female	40-59 years	Non-Hispanic Black	High School	Widowed/Divorced/Separated	3	Never	0	Inactive
74440	1	115	92.7	103	16	14	19	4.7	9.2	2.6	88	4.885	7.02	42.12	5	95	55	1.6	0.6	5.1	244	1.3	0	0.2295	3020.5	2013-2014	107.3333333	54.66666667	0	0	0	0	0	0	0	0	0	≥25	0	0	Female	20-39 years	Non-Hispanic White	College or above	Married or living with a partner	3	Never	1200	Low activity
74442	2	117	102.4	140	41	41	47	4.1	10.2	3.7	114	6.328	20.18	121.08	5.6	112	41	1.3	0.5	1.7	217	31.6	0	0.1045	1524	2013-2014	122.6666667	70	0	0	0	1	1	1	0	0	1	≥25	1	0	Male	60 and above years	Non-Hispanic Black	High School	Married or living with a partner	3	Current	3600	High activity
74476	2	104	86.1	45	15	19	28	4.2	9.2	3.2	100	5.551	6.77	40.62	5.6	67	76	2.6	0.4	1.7	178	10.6	0	NA	0	2013-2014	118.6666667	18	0	0	0	0	0	0	0	0	0	<25	0	0	Female	60 and above years	Other Hispanic	Middle school or lower	Married or living with a partner	2	Never	3240	Medium activity
74487	1	114	116.9	139	19	20	27	4.2	9.5	3	124	6.883	10.05	60.3	5.9	161	42	1.4	0.7	5.8	153	12.3	0	0.256	1694	2013-2014	131.3333333	58	0	1	1	1	1	1	0	0	1	≥25	1	1	Male	60 and above years	Non-Hispanic White	Middle school or lower	Married or living with a partner	3	Current	1440	Low activity
74498	1	115	114.8	228	45	43	27	4.5	9.6	2.9	96	5.329	17.23	103.38	5.1	99	49	2.5	0.8	5.4	274	10.2	7	0	1331.5	2013-2014	129.3333333	82.66666667	0	0	0	1	1	1	0	0	1	≥25	1	0	Male	20-39 years	Mexican American	High School	Married or living with a partner	2	Current	780	Low activity
74509	1	106	99.7	212	88	38	29	4.4	9.1	3.6	297	16.486	12.46	74.76	11.6	473	50	2.5	0.6	6.2	259	115	0	0.1085	1487	2013-2014	121.3333333	71.33333333	1	0	0	1	1	1	0	0	1	≥25	1	1	Female	40-59 years	Other Hispanic	Middle school or lower	Married or living with a partner	2	Never	3600	High activity
74529	1	106	110.3	176	36	36	21	4.6	9.4	2.7	94	5.218	13.34	80.04	5.3	132	50	1.9	0.4	3.2	164	18.8	0	0.2785	3852	2013-2014	112	68	0	0	0	1	1	1	0	0	1	≥25	1	0	Male	40-59 years	Mexican American	Middle school or lower	Married or living with a partner	2	Current	5520	High activity
74532	1	107	94.3	86	70	41	29	4.6	9.6	2.7	99	5.495	9.31	55.86	5.3	0	35	2.1	0.7	4.1	205	9.8	0	NA	0	2013-2014	133.3333333	73.33333333	0	0	0	1	0	1	0	0	1	≥25	1	0	Male	20-39 years	Mexican American	Middle school or lower	Married or living with a partner	1	Former	5520	High activity
74552	1	108	104.1	73	27	12	16	4	9.1	3.5	86	4.774	11.49	68.94	5.8	109	43	3.4	0.8	4.6	326	30	0	0.0375	285	2013-2014	113.3333333	57.33333333	0	0	0	0	1	1	0	0	0	≥25	0	0	Female	40-59 years	Non-Hispanic Black	College or above	Never Married	1	Never	560	Low activity
74583	2	111	130.6	118	12	15	16	4	9.4	2.9	120	6.661	24.59	147.54	6.4	159	46	1.5	0.5	5.6	226	0.6	0	0.1315	1304.5	2013-2014	89.33333333	46	1	1	0	1	1	1	0	0	1	≥25	1	1	Female	60 and above years	Mexican American	High School	Widowed/Divorced/Separated	1	Current	12600	High activity
74619	2	112	99.3	65	29	18	19	4.4	9.7	2.1	130	7.216	11.57	69.42	6.7	0	45	1.8	0.5	4.5	121	142.9	0	0.005	1491	2013-2014	116	50.66666667	1	1	1	1	0	1	0	0	1	≥25	1	0	Male	60 and above years	Non-Hispanic White	High School	Married or living with a partner	3	Current	0	Inactive
74652	1	118	105	248	23	14	15	3.8	8.5	2.6	98	5.44	13.68	82.08	5.9	124	51	2.1	0.5	3.9	369	11	0	0.066	2717	2013-2014	118	76.66666667	0	0	0	1	1	1	0	0	1	≥25	1	0	Female	40-59 years	Mexican American	High School	Married or living with a partner	1	Never	7920	High activity
74731	1	109	109.3	64	17	27	22	4.1	9.5	3.3	98	5.44	16.59	99.54	5.2	114	41	1.3	0.3	3.6	171	8	0	0	1286	2013-2014	112.6666667	64.66666667	0	0	0	1	1	1	0	0	1	≥25	1	0	Female	20-39 years	Mexican American	High School	Married or living with a partner	1	Never	7200	High activity
74732	2	106	84.3	80	15	16	22	4.2	10	2.4	90	4.996	2.91	17.46	5.4	110	61	2.1	0.5	2.8	288	10	0	0.194	1089.5	2013-2014	122.6666667	71.33333333	0	0	0	0	0	0	0	0	0	≥25	0	0	Female	60 and above years	Non-Hispanic White	High School	Married or living with a partner	4	Never	3840	High activity
74734	2	115	109.5	113	44	34	20	4	9.4	2.7	92	5.107	7.64	45.84	5.5	123	55	1.3	0.4	3.5	289	62	0	0.2865	2310.5	2013-2014	142	82	0	0	0	0	1	1	0	0	0	≥25	0	0	Female	40-59 years	Non-Hispanic White	High School	Married or living with a partner	2	Current	6720	High activity
74772	2	106	83.4	82	13	11	18	4.6	10.2	2.7	107	5.94	10.08	60.48	5.6	128	66	1.8	0.6	5.1	231	2.2	0	NA	0	2013-2014	132	73	0	0	0	0	0	0	0	0	0	≥25	0	0	Female	60 and above years	Non-Hispanic White	College or above	Widowed/Divorced/Separated	2	Current	2160	Medium activity
74787	2	109	119	225	29	33	29	3.8	9.5	2.7	109	6.051	13.42	80.52	5.5	126	56	2.8	0.7	7.7	309	9.3	47.5	0.094	1338.5	2013-2014	130	80	0	0	0	1	1	1	0	1	0	≥25	1	1	Female	40-59 years	Non-Hispanic White	High School	Widowed/Divorced/Separated	2	Current	2880	Medium activity
74794	1	110	118.2	427	19	25	20	4.1	9.2	2.5	94	5.218	12.35	74.1	5.5	66	37	1.7	0.9	12.8	274	6.4	38.6	0.036	2393	2013-2014	124	85.33333333	0	0	0	0	1	1	0	1	0	≥25	0	1	Male	20-39 years	Non-Hispanic White	College or above	Married or living with a partner	4	Current	7680	High activity
74818	1	105	99.9	59	15	20	17	4.6	9.5	2.6	92	5.107	5.79	34.74	5.4	99	63	2.4	0.5	3.1	191	2.8	42.3	0.216	1771	2013-2014	124.6666667	70.66666667	0	0	0	0	0	0	0	1	0	≥25	0	0	Male	20-39 years	Non-Hispanic White	College or above	Married or living with a partner	4	Current	1920	Medium activity
74832	1	105	91.6	73	22	21	22	5.3	10.2	2.5	85	4.718	11.61	69.66	5	81	50	3.2	0.6	5.8	185	3.9	0	0.193	1373	2013-2014	129.3333333	62.66666667	0	0	0	0	0	0	0	0	0	<25	0	0	Male	20-39 years	Non-Hispanic White	High School	Never Married	4	Never	240	Low activity
74839	2	112	106.6	564	24	51	31	4.4	9.4	2	107	5.94	19.46	116.76	5.2	78	22	1.9	0.7	4	182	4.2	1.65	0.1495	2492	2013-2014	132	90	0	0	0	1	1	1	0	0	1	≥25	1	1	Male	40-59 years	Non-Hispanic White	College or above	Married or living with a partner	4	Current	900	Low activity
74843	2	111	109.4	53	424	300	294	4.1	9.3	2.8	103	5.718	8.97	53.82	4.9	136	89	1.3	0.7	3.7	130	405	0	0.188	3655	2013-2014	157.3333333	100.6666667	0	0	1	1	1	1	1	0	0	≥25	1	0	Female	20-39 years	Mexican American	Middle school or lower	Married or living with a partner	1	Former	45600	High activity
74866	2	107	113.6	224	39	39	26	3.6	9	2.8	90	4.996	42.28	253.68	5.6	123	38	1.4	0.8	7.8	255	4.4	0	0.153	3560.5	2013-2014	119.3333333	66.66666667	0	0	0	1	1	1	0	0	1	≥25	1	1	Male	40-59 years	Non-Hispanic White	High School	Married or living with a partner	2	Never	12240	High activity
74907	1	104	91.2	59	9	16	22	4.3	9.2	2.7	103	5.718	7.13	42.78	5.3	101	65	1.9	0.5	4.1	269	5.5	7.75	0.242	2160	2013-2014	99.33333333	52	0	0	0	0	0	0	0	0	0	≥25	0	0	Female	40-59 years	Non-Hispanic White	College or above	Married or living with a partner	2	Never	3640	High activity
74928	1	117	104.5	115	16	27	19	4.3	9.4	2.9	112	6.217	6.5	39	5.5	121	45	1.7	0.5	3.8	149	7.7	0	0.0245	2159.5	2013-2014	122	74	0	0	0	0	1	1	0	0	0	≥25	0	0	Male	40-59 years	Mexican American	Middle school or lower	Married or living with a partner	3	Never	9600	High activity
74954	2	118	100.3	63	24	37	25	4.3	9.7	3	95	5.273	9.2	55.2	5.4	149	77	2.5	0.5	2.2	216	2.3	0	0.016	1811	2013-2014	120	70	0	0	0	0	1	1	0	0	0	≥25	0	0	Female	40-59 years	Other Hispanic	High School	Married or living with a partner	3	Never	11080	High activity
74969	2	106	85.2	68	14	19	23	4.5	10	3.3	97	5.384	4.25	25.5	5.2	108	74	1.8	0.7	4.3	259	4.1	0	0.037	1835	2013-2014	93.33333333	55.33333333	0	0	0	0	0	0	0	0	0	≥25	0	0	Male	20-39 years	Mexican American	College or above	Never Married	1	Never	0	Inactive
74974	2	107	145.2	163	19	27	20	4.3	9.3	2.7	114	6.328	56.82	340.92	6.1	181	31	2	0.8	6.4	239	4.7	0	0	4228	2013-2014	127.3333333	85.33333333	0	1	0	1	1	1	0	0	1	≥25	1	1	Male	40-59 years	Non-Hispanic White	College or above	Married or living with a partner	4	Never	200	Low activity
74977	2	107	67	108	8	12	17	4.5	9.8	2.8	87	4.829	9.94	59.64	5.2	71	45	2	0.3	3.7	347	23.5	0	0	736	2013-2014	111.3333333	65.33333333	0	0	0	0	0	0	0	0	0	<25	0	0	Female	20-39 years	Other Race-Including Multi-Racial	High School	Never Married	4	Never	5280	High activity
74983	1	106	87.5	145	15	13	13	4.5	9.5	2.4	106	5.884	8.34	50.04	5.3	0	53	2.7	0.3	3.6	230	5.2	0	0.089	1317	2013-2014	140.6666667	74	1	0	0	0	0	0	0	0	0	≥25	0	0	Female	60 and above years	Mexican American	Middle school or lower	Married or living with a partner	2	Never	1200	Low activity
74985	1	111	92.3	87	13	13	15	3.9	9.7	3	83	4.607	3.59	21.54	5.4	119	60	2.1	0.6	4.6	218	7	0	0.273	1780.5	2013-2014	140	59.33333333	0	0	0	0	0	0	0	0	0	≥25	0	0	Female	60 and above years	Mexican American	Middle school or lower	Widowed/Divorced/Separated	2	Never	560	Low activity
75070	1	118	120	190	108	28	27	4.5	9.1	2.9	198	10.991	11.91	71.46	8.3	0	50	2.1	0.6	4.4	278	26.8	0	0	1280	2013-2014	128.6666667	65.33333333	1	0	0	1	1	1	0	0	1	≥25	1	1	Female	60 and above years	Mexican American	Middle school or lower	Married or living with a partner	1	Never	2160	Medium activity
75105	1	104	106.8	66	22	23	27	4.2	9.5	3.1	108	5.995	14.08	84.48	5.9	126	52	2	0.7	4	285	6.7	9.3	0.066	2638.5	2013-2014	128	64	0	0	0	1	1	1	0	0	1	≥25	1	0	Male	40-59 years	Non-Hispanic White	College or above	Married or living with a partner	4	Never	2000	Medium activity
75112	1	115	98.2	93	9	24	22	3.9	8.8	1.8	174	9.659	98.19	589.14	6.2	0	32	0.7	0.7	6.4	105	185	0	0.0065	2268.5	2013-2014	138	56	1	1	1	1	0	1	0	0	1	≥25	1	1	Male	60 and above years	Non-Hispanic White	College or above	Married or living with a partner	2	Never	2400	Medium activity
75118	2	118	102.5	77	15	12	29	4.2	10.3	3	103	5.718	6.33	37.98	4.7	84	75	1.3	0.8	1.9	277	7.1	0	0	655	2013-2014	112	51.33333333	0	0	0	0	0	0	0	0	0	≥25	0	0	Female	60 and above years	Non-Hispanic Black	High School	Widowed/Divorced/Separated	3	Current	480	Low activity
75123	1	115	120.8	61	41	41	34	4.4	9.9	3.5	92	5.107	20.2	121.2	5.3	93	59	2	0.4	1.3	258	4.7	0	0.0615	2752.5	2013-2014	131.3333333	64.66666667	0	0	0	1	1	1	0	0	1	≥25	1	0	Male	20-39 years	Non-Hispanic Black	High School	Widowed/Divorced/Separated	4	Never	1020	Low activity
75132	2	109	88.6	104	23	49	29	4.5	9.4	2.8	103	5.718	9.53	57.18	5	86	47	1.9	0.5	3.8	259	90	0	0.016	2762	2013-2014	102	74	0	0	0	0	0	0	0	0	0	<25	0	0	Male	20-39 years	Non-Hispanic White	High School	Married or living with a partner	3	Never	4800	High activity
75157	1	108	109.7	124	15	17	19	4.6	9.6	3.1	116	6.439	14.06	84.36	5.3	209	37	3.2	0.5	1.9	230	2.6	0	0.003	1902	2013-2014	140.6666667	88.66666667	1	0	0	0	1	1	0	0	0	≥25	0	1	Male	40-59 years	Non-Hispanic Black	High School	Married or living with a partner	4	Never	960	Low activity
75174	2	116	102.1	128	27	26	28	4.2	9.2	2.6	119	6.606	10.04	60.24	5.7	0	36	1.6	0.7	4.4	288	35	0	0.053	1399.5	2013-2014	130.6666667	73.33333333	1	0	0	0	0	0	0	0	0	≥25	0	1	Male	60 and above years	Non-Hispanic Black	Middle school or lower	Married or living with a partner	1	Current	0	Inactive
75179	1	116	95.7	50	25	14	18	3.5	9.2	4	120	6.661	14.99	89.94	6.6	0	108	0.7	0.4	2.3	203	26.4	0	0.063	2117.5	2013-2014	135.3333333	50.66666667	1	1	0	0	0	0	1	0	0	≥25	0	1	Female	60 and above years	Non-Hispanic Black	High School	Widowed/Divorced/Separated	1	Never	720	Low activity
75189	2	104	95.2	119	22	29	26	4.4	9.5	2.2	95	5.273	5.64	33.84	5.8	100	62	2.1	0.5	2.5	189	11.4	0	0.016	1961	2013-2014	115.3333333	69.33333333	0	0	0	0	0	0	0	0	0	<25	0	0	Male	60 and above years	Other Race-Including Multi-Racial	College or above	Married or living with a partner	4	Never	1200	Low activity
75196	2	113	126.2	407	29	33	25	4.2	9.6	3.2	153	8.493	16.89	101.34	6.6	0	42	1.9	1	5	255	13.8	0	0.228	1001.5	2013-2014	158.6666667	62	1	0	0	1	1	1	0	0	1	≥25	1	1	Female	60 and above years	Non-Hispanic White	High School	Widowed/Divorced/Separated	4	Never	0	Inactive
75212	2	107	93.3	119	18	22	25	4.2	9.1	2.5	97	5.384	14.38	86.28	5.4	70	54	1.6	0.5	2.3	190	4.1	0	0	2817	2013-2014	111.3333333	67.33333333	0	0	0	0	0	0	0	0	0	≥25	0	0	Male	40-59 years	Non-Hispanic White	High School	Married or living with a partner	3	Never	14680	High activity
75222	2	106	94.1	84	15	15	22	4.2	9.5	3.1	105	5.829	7.68	46.08	5.9	0	59	1.9	0.2	3.2	205	6.2	0	0.007	1635	2013-2014	144.6666667	76	0	0	0	0	0	0	0	0	0	≥25	0	0	Female	60 and above years	Other Race-Including Multi-Racial	College or above	Married or living with a partner	4	Never	0	Inactive
[truncated: 599 more rows]
[truncated: 50 more columns]
