# Supplementary material for: Urinary caffeine and its metabolites in association with advanced liver fibrosis and liver steatosis: a nationwide cross-sectional study
Source: Royal Society of Chemistry journal article supplement (doi:10.1039/d3fo04957d), 2024-01-01
Supplement: d3fo04957d2.pdf [file d3fo04957d2.pdf]

## Supplementary Materials

|                                                                                                                                                                                                 |    |
|-------------------------------------------------------------------------------------------------------------------------------------------------------------------------------------------------|----|
| <b>Supplement A</b> Definition of metabolic dysfunction-associated fatty liver disease .....                                                                                                    | 1  |
| <b>Supplement B</b> Definition of metabolic syndrome .....                                                                                                                                      | 2  |
| <b>Table S1</b> Comparison of background characteristics between excluded and included participants.....                                                                                        | 3  |
| <b>Table S2</b> Comparison of clinical features among the included participants .....                                                                                                           | 5  |
| <b>Table S3</b> Distributions of urinary caffeine and caffeine metabolites among the included participants.....                                                                                 | 6  |
| <b>Table S4</b> Comparison of urinary caffeine and its metabolites among included participants.....                                                                                             | 7  |
| <b>Table S5</b> Association of individual urinary caffeine and its metabolites with liver steatosis in subgroup analyses .....                                                                  | 8  |
| <b>Table S6</b> Association of individual urinary caffeine and its metabolites with advanced liver fibrosis in subgroup analyses.....                                                           | 11 |
| <b>Table S7</b> Association of individual urinary caffeine and its metabolites with non-alcoholic fatty liver disease .....                                                                     | 14 |
| <b>Table S8</b> Association of individual urinary caffeine and its metabolites with metabolic dysfunction-associated fatty liver disease.....                                                   | 15 |
| <b>Table S9</b> Association of individual urinary caffeine and its metabolites with liver steatosis defined by FLI(+)......                                                                     | 16 |
| <b>Table S10</b> Association of individual urinary caffeine and its metabolites with liver steatosis defined by FLI(+)/USFLI(+)......                                                           | 17 |
| <b>Table S11</b> Association of individual urinary caffeine and its metabolites with advanced liver fibrosis among participants without excessive alcohol consumption and viral hepatitis ..... | 18 |
| <b>Table S12</b> Association of individual urinary caffeine and its metabolites with advanced liver fibrosis define by FIB-4(+) .....                                                           | 19 |
| <b>Table S13</b> Association of individual urinary caffeine and its metabolites with advanced liver fibrosis define by NFS(+)/FIB-4(+)/APRI(+)......                                            | 20 |

## Supplement A: Definition of metabolic dysfunction-associated fatty liver disease

Metabolic dysfunction-associated fatty liver disease was defined as the presence of liver steatosis with at least one of the three following metabolic components: overweight or obesity (body mass index  $\geq 25$  kg/m<sup>2</sup>), type 2 diabetes mellitus, and at least two metabolic risk abnormalities.<sup>1-2</sup> Although imaging tools are the preferred diagnostic procedure for hepatic steatosis, their availability is limited in 2009-2014 survey cycles of NHANES. Nevertheless, fatty liver scoring systems are acceptable alternatives for diagnosing hepatic steatosis.<sup>3</sup> The United States fatty liver index (USFLI) is a widely used hepatic steatosis scoring system in previous studies, and it was developed in the multi-ethnic US population from NHANES, with an area under the receiver operating characteristic curve of 0.80 (95% CI: 0.77-0.83).<sup>4</sup> Liver steatosis was defined as the USFLI score  $\geq 30$  in this study, and USFLI was calculated as previously described.<sup>4</sup> The metabolic risk abnormalities included: (a) waist circumference  $\geq 102$  cm for males or  $\geq 88$  cm for females; (b) blood pressure  $\geq 130/85$  mmHg or currently taking specific medications; (c) plasma triglycerides  $\geq 150$  mg/dL or currently taking specific medications; (d) plasma high-density lipoprotein-cholesterol  $< 40$  mg/dL for males and  $< 50$  mg/dL for females or currently taking specific drugs; (e) prediabetes status (i.e., fasting glucose levels 100 to 125 mg/dL, or hemoglobin A1c 5.7-6.4%); (f) homeostasis model assessment of insulin resistance score  $\geq 2.5$ .<sup>2</sup>

### References:

- 1 M. Eslam, P. N. Newsome, S. K. Sarin, *et al.*, A new definition for metabolic dysfunction-associated fatty liver disease: An international expert consensus statement, *J Hepatol*, 2020, **73**, 202-209.
- 2 Z. Q. Xie, H. X. Li, B. K. Wang, *et al.*, Trends in prevalence and all-cause mortality of metabolic dysfunction-associated fatty liver disease among adults in the past three decades: Results from the NHANES study, *Eur J Intern Med*, 2023, **110**, 62-70.
- 3 European Association for the Study of the Liver (EASL), European Association for the Study of Diabetes (EASD), and European Association for the Study of Obesity (EASO), EASL-EASD-EASO Clinical Practice Guidelines for the management of non-alcoholic fatty liver disease, *Diabetologia*, 2016, **59**, 1121-1140.
- 4 C. E. Ruhl and J. E. Everhart, Fatty liver indices in the multiethnic United States National Health and Nutrition Examination Survey, *Aliment Pharmacol Ther*, 2015, **41**, 65-76.

## Supplement B: Definition of metabolic syndrome

The diagnostic criteria proposed by the Adult Treatment Program III of the National Cholesterol Education Program (ATP III) were applied as the definition of metabolic syndrome in this study.<sup>1</sup> Individuals with at least three of the following components were classified as metabolic syndrome: (a) Central obesity: waist circumference  $\geq 102$  centimeters for males or  $\geq 88$  centimeters for females; (b) Elevated triglyceride: blood triglyceride (TG)  $\geq 150$  mg/dL or current using medication to treat elevated TG; (c) Reduced high-density lipoprotein: blood high-density lipoprotein (HDL)  $< 40$  mg/dL for males, blood HDL  $< 50$  mg/dL for females, or currently using medication for low HDL; (d) High blood pressure: systolic blood pressure  $\geq 130$  mmHg or (and) diastolic blood pressure  $\geq 85$  mmHg or currently using medication for high blood pressure; (e) Impaired fasting blood glucose: fasting blood glucose (FBG)  $\geq 110$  mg/dL or current use of medication to treat hyperglycemia.

### References:

- 1 S. M. Grundy, H. B. Brewer, Jr., J. *et al.*, Definition of metabolic syndrome: Report of the National Heart, Lung, and Blood Institute/American Heart Association conference on scientific issues related to definition, *Circulation*, 2004, **109**, 433-438.

**Table S1** Comparison of background characteristics between excluded and included participants

| Characteristics <sup>a</sup>              | Overall (n = 5344)         | Excluded (n = 3276)        | Included (n = 2068)        | P value <sup>b</sup> |
|-------------------------------------------|----------------------------|----------------------------|----------------------------|----------------------|
| <b>Gender (%)</b>                         |                            |                            |                            | 0.400                |
| Female                                    | 2743 (51.46%)              | 1658 (50.94%)              | 1085 (52.24%)              |                      |
| Male                                      | 2601 (48.54%)              | 1618 (49.06%)              | 983 (47.76%)               |                      |
| <b>Age (%)</b>                            |                            |                            |                            | 0.400                |
| 20-39 years                               | 1789 (36.58%)              | 1107 (37.54%)              | 682 (35.14%)               |                      |
| 40-59 years                               | 1813 (35.80%)              | 1109 (35.21%)              | 704 (36.68%)               |                      |
| 60 and above years                        | 1742 (27.62%)              | 1060 (27.25%)              | 682 (28.18%)               |                      |
| <b>Race/Ethnicity (%)</b>                 |                            |                            |                            | <0.001               |
| Mexican American                          | 745 (8.35%)                | 458 (8.61%)                | 287 (7.98%)                |                      |
| Other Hispanic                            | 532 (5.94%)                | 341 (6.25%)                | 191 (5.48%)                |                      |
| Non-Hispanic White                        | 2299 (66.71%)              | 1332 (64.79%)              | 967 (69.57%)               |                      |
| Non-Hispanic Black                        | 1128 (11.45%)              | 756 (12.93%)               | 372 (9.24%)                |                      |
| Other Race                                | 640 (7.54%)                | 389 (7.42%)                | 251 (7.72%)                |                      |
| <b>Education level (%)</b>                |                            |                            |                            | 0.300                |
| Middle school or lower                    | 1280 (16.34%)              | 801 (16.56%)               | 479 (16.02%)               |                      |
| High School                               | 2769 (52.91%)              | 1720 (53.65%)              | 1049 (51.80%)              |                      |
| College or above                          | 1295 (30.75%)              | 755 (29.80%)               | 540 (32.17%)               |                      |
| <b>Poverty-income ratio</b>               | 2.95 (1.37, 5.00)          | 2.91 (1.34, 5.00)          | 3.00 (1.43, 5.00)          | 0.900                |
| <b>Marital status (%)</b>                 |                            |                            |                            | 0.200                |
| Married/Cohabited                         | 3182 (62.93%)              | 1927 (61.63%)              | 1255 (64.88%)              |                      |
| Never Married                             | 1020 (18.90%)              | 637 (19.46%)               | 383 (18.06%)               |                      |
| Other                                     | 1142 (18.17%)              | 712 (18.92%)               | 430 (17.05%)               |                      |
| <b>Smoking status (%)</b>                 |                            |                            |                            | 0.400                |
| Current                                   | 2137 (39.70%)              | 1294 (38.90%)              | 843 (40.91%)               |                      |
| Former                                    | 198 (3.13%)                | 120 (3.34%)                | 78 (2.82%)                 |                      |
| Never                                     | 3009 (57.17%)              | 1862 (57.76%)              | 1147 (56.27%)              |                      |
| <b>Excessive alcohol consumption(%)</b>   |                            |                            |                            | 0.900                |
| No                                        | 4780 (87.73%)              | 2924 (87.67%)              | 1856 (87.82%)              |                      |
| Yes                                       | 564 (12.27%)               | 352 (12.33%)               | 212 (12.18%)               |                      |
| <b>Physical activity (%)</b>              |                            |                            |                            | 0.600                |
| Inactive                                  | 1383 (22.64%)              | 878 (23.45%)               | 505 (21.43%)               |                      |
| Low activity                              | 1865 (35.48%)              | 1138 (34.91%)              | 727 (36.33%)               |                      |
| Medium activity                           | 754 (15.42%)               | 449 (15.24%)               | 305 (15.69%)               |                      |
| High activity                             | 1342 (26.46%)              | 811 (26.40%)               | 531 (26.55%)               |                      |
| <b>Caffeine intake (g/day)</b>            | 0.12 (0.04, 0.24)          | 0.11 (0.04, 0.23)          | 0.12 (0.05, 0.24)          | 0.075                |
| <b>Energy intake (kcal/day)</b>           | 1980.00 (1530.00, 2539.42) | 1994.69 (1554.66, 2543.19) | 1971.21 (1492.67, 2531.94) | 0.052                |
| <b>Body mass index (kg/m<sup>2</sup>)</b> | 27.84 (24.18, 32.30)       | 27.90 (24.30, 32.30)       | 27.81 (24.00, 32.20)       | 0.600                |
| <b>FBG (mg/dL)</b>                        | 98.00 (91.00, 107.00)      | 98.00 (91.00, 108.00)      | 98.00 (91.00, 107.00)      | 0.900                |
| <b>HbA1c (%)</b>                          | 5.50 (5.20, 5.80)          | 5.50 (5.20, 5.80)          | 5.40 (5.20, 5.70)          | 0.200                |
| <b>SBP (mmHg)</b>                         | 118.67 (110.00, 129.33)    | 119.33 (110.90, 130.00)    | 118.67 (109.33, 128.67)    | <b>0.029</b>         |
| <b>DBP (mmHg)</b>                         | 70.67 (64.00, 78.00)       | 71.33 (64.00, 78.67)       | 70.00 (63.33, 76.67)       | <b>&lt;0.001</b>     |
| <b>Survey cycle (%)</b>                   |                            |                            |                            | 0.600                |
| 2009-2010                                 | 1936 (32.65%)              | 1189 (33.11%)              | 747 (31.95%)               |                      |
| 2011-2012                                 | 1622 (33.81%)              | 1005 (34.03%)              | 617 (33.49%)               |                      |
| 2013-2014                                 | 1786 (33.54%)              | 1082 (32.85%)              | 704 (34.56%)               |                      |

**Notes:** <sup>a</sup> Categorical variables were demonstrated as unweighted frequency (weighted percentage), while continuous variables were shown as median (inter-quartile range) due to their skewed distributions. <sup>b</sup> Categorical variables were compared using the chi-squared tests with Rao & Scott's second-order correction, while continuous variables were compared using the Wilcoxon rank-sum test for complex survey samples.

**Abbreviations:** FBG, fasting blood glucose; HbA1c, hemoglobin A1c; SBP, systolic blood pressure; DBP, diastolic blood pressure

**Table S2** Comparison of clinical features among the included participants

| Characteristics <sup>a</sup>  | Overall (n = 2068)      | Liver steatosis <sup>b</sup> |                         |                             | Advanced liver fibrosis <sup>b</sup> |                         |                             |
|-------------------------------|-------------------------|------------------------------|-------------------------|-----------------------------|--------------------------------------|-------------------------|-----------------------------|
|                               |                         | No (n = 1367)                | Yes (n = 701)           | <i>P</i> value <sup>c</sup> | No (n = 1889)                        | Yes (n = 179)           | <i>P</i> value <sup>c</sup> |
| <b>WC (cm)</b>                | 97.28 (87.30, 107.81)   | 92.10 (84.00, 99.73)         | 112.20 (103.00, 121.00) | < <b>0.001</b>              | 96.20 (87.00, 106.60)                | 113.80 (99.93, 130.65)  | < <b>0.001</b>              |
| <b>TG (mg/dL)</b>             | 101.00 (72.00, 147.00)  | 89.00 (65.00, 122.00)        | 139.00 (98.93, 199.40)  | < <b>0.001</b>              | 99.00 (72.00, 145.00)                | 123.00 (82.00, 183.43)  | < <b>0.001</b>              |
| <b>GGT (U/L)</b>              | 19.00 (13.00, 28.00)    | 16.00 (12.00, 21.00)         | 28.00 (19.00, 41.00)    | < <b>0.001</b>              | 18.00 (13.00, 27.00)                 | 20.21 (15.00, 32.00)    | <b>0.015</b>                |
| <b>AST (U/L)</b>              | 23.00 (19.00, 27.00)    | 22.00 (19.00, 26.00)         | 25.00 (21.00, 31.00)    | < <b>0.001</b>              | 23.00 (19.00, 27.00)                 | 24.00 (21.00, 27.59)    | <b>0.011</b>                |
| <b>ALT (U/L)</b>              | 21.00 (17.00, 28.00)    | 20.00 (16.00, 24.00)         | 26.00 (20.00, 36.00)    | < <b>0.001</b>              | 21.00 (17.00, 28.00)                 | 20.00 (16.00, 26.00)    | 0.150                       |
| <b>ALB (g/L)</b>              | 4.30 (4.10, 4.50)       | 4.30 (4.10, 4.50)            | 4.20 (4.00, 4.40)       | < <b>0.001</b>              | 4.30 (4.10, 4.50)                    | 4.10 (3.90, 4.30)       | < <b>0.001</b>              |
| <b>FBG (mg/dL)</b>            | 98.00 (91.00, 107.00)   | 95.00 (89.00, 101.05)        | 107.00 (100.00, 123.00) | < <b>0.001</b>              | 98.00 (91.00, 105.00)                | 120.00 (110.00, 147.69) | < <b>0.001</b>              |
| <b>Insulin (μU/mL)</b>        | 9.53 (6.13, 15.40)      | 7.22 (4.96, 10.28)           | 18.76 (13.99, 27.24)    | < <b>0.001</b>              | 9.31 (6.00, 14.60)                   | 15.87 (9.35, 24.93)     | < <b>0.001</b>              |
| <b>HbA1c (%)</b>              | 5.40 (5.20, 5.70)       | 5.40 (5.10, 5.60)            | 5.70 (5.40, 6.10)       | < <b>0.001</b>              | 5.40 (5.20, 5.70)                    | 6.20 (5.80, 7.20)       | < <b>0.001</b>              |
| <b>PLT (10<sup>9</sup>/L)</b> | 228.00 (194.00, 268.00) | 226.00 (195.00, 262.12)      | 237.00 (191.00, 284.00) | <b>0.026</b>                | 231.00 (200.00, 270.33)              | 178.00 (149.09, 205.95) | < <b>0.001</b>              |
| <b>SBP (mmHg)</b>             | 118.67 (109.33, 128.67) | 116.00 (106.67, 125.33)      | 124.00 (114.67, 134.26) | < <b>0.001</b>              | 118.00 (108.67, 127.33)              | 131.33 (116.15, 142.96) | < <b>0.001</b>              |
| <b>DBP (mmHg)</b>             | 70.00 (63.33, 76.67)    | 68.67 (62.67, 74.67)         | 72.67 (64.00, 78.67)    | < <b>0.001</b>              | 70.00 (63.33, 76.67)                 | 64.67 (58.00, 73.45)    | <b>0.003</b>                |
| <b>Cr. (mg/dL)</b>            | 103.31 (62.00, 161.00)  | 95.00 (57.00, 152.00)        | 124.00 (76.00, 175.00)  | < <b>0.001</b>              | 103.00 (61.00, 162.00)               | 109.00 (78.72, 149.00)  | 0.140                       |
| <b>MetS (%)</b>               |                         |                              |                         | < <b>0.001</b>              |                                      |                         | < <b>0.001</b>              |
| <b>No</b>                     | 1443 (72.96%)           | 1174 (87.45%)                | 269 (41.34%)            |                             | 1406.00 (76.53%)                     | 37.00 (23.60%)          |                             |
| <b>Yes</b>                    | 625 (27.04%)            | 193 (12.55%)                 | 432 (58.66%)            |                             | 483.00 (23.47%)                      | 142.00 (76.40%)         |                             |

**Notes:** <sup>a</sup> Categorical variables were demonstrated as unweighted frequency (weighted percentage), while continuous variables were shown as median (inter-quartile range) due to their skewed distributions. <sup>b</sup> Liver steatosis was defined by USFLI  $\geq 30$ , while advanced liver fibrosis was indicated by NFS  $> 0.676$ . <sup>c</sup> Categorical variables were compared using the chi-squared tests with Rao & Scott's second-order correction, while continuous variables were compared using the Wilcoxon rank-sum test for complex survey samples.

**Abbreviation:** WC, waist circumference; TG, triglyceride; GGT, gamma-glutamyl transferase; ALT, alanine transaminase; AST, Aspartate transaminase; ALB, albumin; FBG, fasting blood glucose; HbA1c, hemoglobin A1c; PLT, platelet count; SBP, systolic blood pressure; DBP, diastolic blood pressure; Cr, creatinine; MetS, metabolic syndrome.

**Table S3** Distributions of urinary caffeine and caffeine metabolites among the included participants (*n* = 2068)

| Metabolites                          | Abbreviation | LLOD (μmol/L) | DF (%) | GM (μmol/L) | Mean (μmol/L) | Percentiles |       |        |
|--------------------------------------|--------------|---------------|--------|-------------|---------------|-------------|-------|--------|
|                                      |              |               |        |             |               | P25         | P50   | P75    |
| 1-methyluric acid                    | 1-MU         | 0.050         | 100.00 | 55.29       | 108.75        | 24.50       | 59.60 | 133.00 |
| 3-methyluric acid                    | 3-MU         | 0.100         | 83.12  | 0.52        | 1.36          | 0.17        | 0.54  | 1.45   |
| 7-methyluric acid                    | 7-MU         | 0.040         | 99.23  | 11.29       | 29.60         | 4.66        | 13.51 | 33.46  |
| 1,3-dimethyluric acid                | 1,3-DMU      | 0.020         | 98.16  | 5.29        | 14.41         | 2.59        | 7.16  | 16.10  |
| 1,7-dimethyluric acid                | 1,7-DMU      | 0.020         | 98.50  | 17.50       | 47.92         | 7.69        | 25.22 | 61.91  |
| 3,7-dimethyluric acid                | 3,7-DMU      | 0.030         | 95.26  | 0.80        | 1.92          | 0.34        | 0.87  | 2.20   |
| 1,3,7-trimethyluric acid             | 1,3,7-TMU    | 0.005         | 95.21  | 0.83        | 2.52          | 0.29        | 1.18  | 3.06   |
| 1-methylxanthine                     | 1-MX         | 0.030         | 100.00 | 22.26       | 50.43         | 9.35        | 25.81 | 64.73  |
| 3-methylxanthine                     | 3-MX         | 0.040         | 99.47  | 23.98       | 55.71         | 11.50       | 27.85 | 64.12  |
| 7-methylxanthine                     | 7-MX         | 0.020         | 99.90  | 38.16       | 87.81         | 17.11       | 41.80 | 105.00 |
| 1,3-dimethylxanthine (theophylline)  | 1,3-DMX      | 0.010         | 97.24  | 1.25        | 3.00          | 0.61        | 1.75  | 3.62   |
| 1,7-dimethylxanthine (paraxanthine)  | 1,7-DMX      | 0.006         | 98.79  | 10.19       | 22.65         | 4.80        | 14.61 | 30.99  |
| 3,7-dimethylxanthine (theobromine)   | 3,7-DMX      | 0.004         | 99.47  | 12.00       | 26.32         | 5.84        | 14.52 | 32.53  |
| 1,3,7-trimethylxanthine (caffeine)   | 1,3,7-TMX    | 0.003         | 96.91  | 1.94        | 5.36          | 0.79        | 2.75  | 6.94   |
| 5-acetylamino-6-amino-3-methyluracil | AAMU         | 0.100         | 99.61  | 51.91       | 112.78        | 22.50       | 60.60 | 143.00 |

**Abbreviation:** LLOD, lower limit of detection; DF, detection frequency; GM, geometric mean.

**Table S4** Comparison of urinary caffeine and its metabolites among included participants (*n* = 2068)

| Metabolites <sup>a</sup><br>(Unit: $\mu\text{mol}/\text{mg Cr.}$ ) | Overall<br>( <i>n</i> = 2068) | Liver steatosis <sup>b</sup> |                       |                             | Advanced Liver fibrosis <sup>b</sup> |                       |                             |
|--------------------------------------------------------------------|-------------------------------|------------------------------|-----------------------|-----------------------------|--------------------------------------|-----------------------|-----------------------------|
|                                                                    |                               | No ( <i>n</i> = 1367)        | Yes ( <i>n</i> = 701) | <i>P</i> value <sup>c</sup> | No ( <i>n</i> = 1889)                | Yes ( <i>n</i> = 179) | <i>P</i> value <sup>c</sup> |
| 1-MU                                                               | 0.72 (0.32, 1.34)             | 0.73 (0.32, 1.36)            | 0.71 (0.33, 1.28)     | 0.900                       | 0.72 (0.32, 1.34)                    | 0.72 (0.27, 1.35)     | 0.900                       |
| 3-MU                                                               | 0.01 (0.00, 0.02)             | 0.01 (0.00, 0.02)            | 0.01 (0.00, 0.02)     | 0.900                       | 0.01 (0.00, 0.02)                    | 0.01 (0.00, 0.02)     | 0.200                       |
| 7-MU                                                               | 0.17 (0.07, 0.39)             | 0.17 (0.07, 0.43)            | 0.18 (0.07, 0.35)     | 0.700                       | 0.17 (0.07, 0.39)                    | 0.18 (0.07, 0.44)     | 0.500                       |
| 1,3-DMU                                                            | 0.09 (0.04, 0.16)             | 0.08 (0.03, 0.16)            | 0.10 (0.05, 0.17)     | <b>0.004</b>                | 0.09 (0.04, 0.16)                    | 0.09 (0.03, 0.17)     | 0.900                       |
| 1,7-DMU                                                            | 0.31 (0.12, 0.61)             | 0.28 (0.10, 0.57)            | 0.38 (0.18, 0.66)     | <b>&lt;0.001</b>            | 0.31 (0.12, 0.60)                    | 0.36 (0.12, 0.81)     | 0.200                       |
| 3,7-DMU                                                            | 0.01 (0.01, 0.02)             | 0.01 (0.00, 0.03)            | 0.01 (0.01, 0.02)     | 0.700                       | 0.01 (0.01, 0.03)                    | 0.01 (0.00, 0.02)     | <b>0.008</b>                |
| 1,3,7-TMU                                                          | 0.01 (0.00, 0.03)             | 0.01 (0.00, 0.03)            | 0.02 (0.01, 0.04)     | <b>&lt;0.001</b>            | 0.01 (0.00, 0.03)                    | 0.02 (0.01, 0.03)     | 0.120                       |
| 1-MX                                                               | 0.34 (0.14, 0.63)             | 0.35 (0.13, 0.64)            | 0.31 (0.14, 0.58)     | 0.130                       | 0.35 (0.14, 0.64)                    | 0.25 (0.09, 0.49)     | <b>&lt;0.001</b>            |
| 3-MX                                                               | 0.35 (0.16, 0.75)             | 0.37 (0.17, 0.82)            | 0.32 (0.14, 0.64)     | <b>0.019</b>                | 0.35 (0.16, 0.76)                    | 0.32 (0.15, 0.67)     | 0.200                       |
| 7-MX                                                               | 0.55 (0.24, 1.18)             | 0.58 (0.27, 1.32)            | 0.46 (0.20, 0.89)     | <b>&lt;0.001</b>            | 0.56 (0.25, 1.22)                    | 0.36 (0.16, 0.84)     | <b>&lt;0.001</b>            |
| 1,3-DMX                                                            | 0.02 (0.01, 0.04)             | 0.02 (0.01, 0.04)            | 0.02 (0.01, 0.04)     | 0.200                       | 0.02 (0.01, 0.04)                    | 0.02 (0.00, 0.03)     | <b>0.006</b>                |
| 1,7-DMX                                                            | 0.15 (0.06, 0.33)             | 0.15 (0.06, 0.33)            | 0.16 (0.08, 0.33)     | 0.400                       | 0.16 (0.06, 0.34)                    | 0.11 (0.03, 0.19)     | <b>&lt;0.001</b>            |
| 3,7-DMX                                                            | 0.18 (0.07, 0.39)             | 0.18 (0.07, 0.42)            | 0.17 (0.07, 0.36)     | 0.200                       | 0.18 (0.07, 0.40)                    | 0.11 (0.05, 0.23)     | <b>&lt;0.001</b>            |
| 1,3,7-TMX                                                          | 0.03 (0.01, 0.08)             | 0.03 (0.01, 0.07)            | 0.04 (0.01, 0.09)     | <b>&lt;0.001</b>            | 0.03 (0.01, 0.08)                    | 0.04 (0.01, 0.08)     | 0.600                       |
| AAMU                                                               | 0.71 (0.31, 1.35)             | 0.70 (0.29, 1.35)            | 0.72 (0.34, 1.35)     | 0.300                       | 0.72 (0.31, 1.35)                    | 0.61 (0.23, 1.37)     | 0.500                       |

*Notes:* <sup>a</sup> Continuous variables were shown as median (inter-quartile range) due to their skewed distributions. <sup>b</sup> Liver steatosis was defined by USFLI  $\geq 30$ , while advanced liver fibrosis was indicated by NFS  $>0.676$ . <sup>c</sup> Continuous variables were compared using the Wilcoxon rank-sum test for complex survey samples.



**Table S5** Association of individual urinary caffeine and its metabolites with liver steatosis in subgroup analyses

| Metabolites                                | Continuous <sup>a</sup>    | Quantile1 <sup>b</sup> | Quantile2                 | Quantile3         | Quantile4                  | <i>P</i> for trend |
|--------------------------------------------|----------------------------|------------------------|---------------------------|-------------------|----------------------------|--------------------|
| <b>Subgroup: Males (<i>n</i> = 983)</b>    |                            |                        |                           |                   |                            |                    |
| 1-MU                                       | 1.03 (0.86, 1.22)          | Reference              | 0.92 (0.45, 1.88)         | 0.86 (0.47, 1.57) | 0.97 (0.54, 1.74)          | 0.868              |
| 3-MU                                       | 0.95 (0.80, 1.13)          | Reference              | 1.04 (0.56, 1.91)         | 1.00 (0.55, 1.80) | 0.72 (0.37, 1.41)          | 0.361              |
| 7-MU                                       | 0.92 (0.78, 1.07)          | Reference              | 0.70 (0.44, 1.11)         | 0.80 (0.41, 1.53) | 0.60 (0.32, 1.11)          | 0.161              |
| 1,3-DMU                                    | <b>1.20 (1.03, 1.39)*</b>  | Reference              | 1.65 (0.94, 2.91)         | 1.79 (0.92, 3.49) | 1.61 (0.85, 3.03)          | 0.148              |
| 1,7-DMU                                    | <b>1.17 (1.01, 1.36)*</b>  | Reference              | 1.43 (0.76, 2.70)         | 1.61 (0.84, 3.07) | 1.77 (0.91, 3.44)          | 0.098              |
| 3,7-DMU                                    | 0.95 (0.80, 1.12)          | Reference              | 1.00 (0.59, 1.71)         | 1.34 (0.74, 2.40) | 0.63 (0.37, 1.08)          | 0.251              |
| 1,3,7-TMU                                  | <b>1.28 (1.10, 1.50)**</b> | Reference              | 1.44 (0.73, 2.84)         | 1.89 (0.95, 3.76) | <b>3.13 (1.60, 6.09)**</b> | <b>0.002</b>       |
| 1-MX                                       | 1.05 (0.91, 1.22)          | Reference              | 1.09 (0.58, 2.04)         | 0.92 (0.47, 1.79) | 1.13 (0.64, 2.00)          | 0.831              |
| 3-MX                                       | 0.86 (0.73, 1.02)          | Reference              | 0.97 (0.59, 1.59)         | 0.93 (0.53, 1.65) | <b>0.43 (0.23, 0.83)*</b>  | <b>0.022</b>       |
| 7-MX                                       | <b>0.83 (0.69, 0.99)*</b>  | Reference              | 0.74 (0.45, 1.22)         | 0.90 (0.48, 1.71) | <b>0.35 (0.19, 0.64)**</b> | <b>0.007</b>       |
| 1,3-DMX                                    | 1.11 (0.95, 1.29)          | Reference              | 1.04 (0.61, 1.79)         | 1.21 (0.70, 2.08) | 1.38 (0.70, 2.71)          | 0.302              |
| 1,7-DMX                                    | 1.09 (0.95, 1.26)          | Reference              | 1.90 (1.00, 3.59)         | 1.24 (0.68, 2.23) | 1.45 (0.75, 2.77)          | 0.499              |
| 3,7-DMX                                    | 0.94 (0.80, 1.10)          | Reference              | 0.99 (0.58, 1.70)         | 1.03 (0.60, 1.77) | 0.58 (0.30, 1.10)          | 0.140              |
| 1,3,7-TMX                                  | 1.15 (1.00, 1.32)          | Reference              | 1.14 (0.64, 2.04)         | 1.48 (0.81, 2.71) | 1.83 (0.89, 3.77)          | 0.069              |
| AAMU                                       | 1.10 (0.92, 1.31)          | Reference              | 1.12 (0.72, 1.73)         | 1.24 (0.66, 2.32) | 1.11 (0.60, 2.04)          | 0.704              |
| <b>Subgroup: Females (<i>n</i> = 1085)</b> |                            |                        |                           |                   |                            |                    |
| 1-MU                                       | 0.80 (0.64, 1.01)          | Reference              | 0.94 (0.49, 1.78)         | 1.05 (0.51, 2.15) | 0.62 (0.29, 1.32)          | 0.299              |
| 3-MU                                       | 0.91 (0.75, 1.10)          | Reference              | 0.51 (0.26, 1.00)         | 1.00 (0.53, 1.90) | 0.72 (0.36, 1.44)          | 0.782              |
| 7-MU                                       | 0.92 (0.77, 1.08)          | Reference              | <b>0.43 (0.23, 0.81)*</b> | 0.84 (0.43, 1.65) | 0.59 (0.30, 1.16)          | 0.444              |
| 1,3-DMU                                    | 1.01 (0.85, 1.21)          | Reference              | 0.92 (0.50, 1.71)         | 0.88 (0.52, 1.47) | 1.39 (0.72, 2.69)          | 0.387              |
| 1,7-DMU                                    | 1.02 (0.88, 1.19)          | Reference              | 1.07 (0.57, 2.02)         | 1.00 (0.58, 1.72) | 1.37 (0.73, 2.55)          | 0.395              |
| 3,7-DMU                                    | 1.05 (0.87, 1.26)          | Reference              | <b>0.44 (0.25, 0.79)*</b> | 0.81 (0.44, 1.50) | 0.94 (0.52, 1.70)          | 0.664              |
| 1,3,7-TMU                                  | 1.11 (0.96, 1.28)          | Reference              | 1.20 (0.64, 2.24)         | 1.10 (0.62, 1.94) | 1.82 (1.02, 3.24)          | 0.069              |
| 1-MX                                       | 0.87 (0.73, 1.05)          | Reference              | 1.48 (0.84, 2.61)         | 0.75 (0.35, 1.62) | 0.73 (0.37, 1.44)          | 0.167              |
| 3-MX                                       | 0.88 (0.73, 1.05)          | Reference              | 0.52 (0.26, 1.02)         | 0.75 (0.38, 1.48) | 0.59 (0.33, 1.08)          | 0.258              |
| 7-MX                                       | <b>0.82 (0.69, 0.98)*</b>  | Reference              | <b>0.46 (0.24, 0.85)*</b> | 0.72 (0.37, 1.42) | <b>0.46 (0.25, 0.83)*</b>  | 0.093              |
| 1,3-DMX                                    | 0.97 (0.82, 1.15)          | Reference              | 1.17 (0.64, 2.15)         | 0.92 (0.52, 1.62) | 1.07 (0.56, 2.02)          | 0.966              |
| 1,7-DMX                                    | 0.97 (0.83, 1.13)          | Reference              | 1.20 (0.65, 2.22)         | 1.07 (0.62, 1.85) | 0.99 (0.51, 1.90)          | 0.879              |

|                                                                     |                           |           |                            |                           |                           |              |
|---------------------------------------------------------------------|---------------------------|-----------|----------------------------|---------------------------|---------------------------|--------------|
| 3,7-DMX                                                             | 0.97 (0.83, 1.13)         | Reference | 0.56 (0.31, 1.03)          | 0.71 (0.38, 1.32)         | 0.96 (0.52, 1.76)         | 0.917        |
| 1,3,7-TMX                                                           | 1.06 (0.92, 1.21)         | Reference | 1.31 (0.62, 2.77)          | 1.19 (0.68, 2.10)         | 1.63 (0.88, 3.01)         | 0.166        |
| AAMU                                                                | 0.85 (0.68, 1.05)         | Reference | 0.91 (0.53, 1.55)          | 1.04 (0.56, 1.94)         | 0.69 (0.39, 1.23)         | 0.326        |
| <b>Subgroup: Participants with metabolic syndrome (n = 625)</b>     |                           |           |                            |                           |                           |              |
| 1-MU                                                                | 0.83 (0.61, 1.11)         | Reference | 0.93 (0.46, 1.89)          | 0.84 (0.38, 1.84)         | 0.66 (0.29, 1.50)         | 0.352        |
| 3-MU                                                                | 0.86 (0.65, 1.15)         | Reference | 0.71 (0.29, 1.74)          | 0.72 (0.36, 1.41)         | 0.68 (0.28, 1.62)         | 0.455        |
| 7-MU                                                                | 0.83 (0.65, 1.06)         | Reference | 0.49 (0.25, 1.00)          | 0.45 (0.20, 1.06)         | 0.41 (0.16, 1.05)         | 0.089        |
| 1,3-DMU                                                             | 1.08 (0.86, 1.34)         | Reference | 1.54 (0.67, 3.55)          | 1.19 (0.63, 2.27)         | 1.53 (0.62, 3.77)         | 0.486        |
| 1,7-DMU                                                             | 1.06 (0.87, 1.29)         | Reference | 1.50 (0.75, 2.98)          | 1.40 (0.66, 2.95)         | 1.27 (0.58, 2.80)         | 0.636        |
| 3,7-DMU                                                             | 0.97 (0.76, 1.25)         | Reference | 0.60 (0.29, 1.23)          | 0.64 (0.37, 1.09)         | 0.92 (0.38, 2.23)         | 0.899        |
| 1,3,7-TMU                                                           | 1.17 (0.98, 1.40)         | Reference | 1.52 (0.73, 3.17)          | 1.32 (0.59, 2.97)         | 2.08 (0.99, 4.35)         | 0.122        |
| 1-MX                                                                | 0.93 (0.74, 1.17)         | Reference | 1.90 (0.94, 3.81)          | 0.76 (0.34, 1.72)         | 1.02 (0.48, 2.17)         | 0.521        |
| 3-MX                                                                | 0.82 (0.62, 1.10)         | Reference | 0.68 (0.34, 1.37)          | <b>0.40 (0.18, 0.88)*</b> | 0.47 (0.18, 1.21)         | 0.074        |
| 7-MX                                                                | 0.79 (0.59, 1.05)         | Reference | <b>0.38 (0.20, 0.69)**</b> | 0.50 (0.26, 1.00)         | <b>0.35 (0.13, 0.93)*</b> | 0.083        |
| 1,3-DMX                                                             | 1.04 (0.84, 1.28)         | Reference | 1.51 (0.75, 3.01)          | 1.21 (0.59, 2.45)         | 1.17 (0.53, 2.58)         | 0.861        |
| 1,7-DMX                                                             | 1.00 (0.83, 1.22)         | Reference | 1.46 (0.74, 2.86)          | 1.16 (0.65, 2.07)         | 1.10 (0.46, 2.59)         | 0.972        |
| 3,7-DMX                                                             | 0.95 (0.75, 1.20)         | Reference | 0.83 (0.48, 1.45)          | <b>0.50 (0.28, 0.88)*</b> | 0.80 (0.35, 1.83)         | 0.381        |
| 1,3,7-TMX                                                           | 1.11 (0.94, 1.31)         | Reference | 1.29 (0.52, 3.17)          | 1.29 (0.50, 3.34)         | 1.63 (0.67, 3.97)         | 0.304        |
| AAMU                                                                | 0.89 (0.67, 1.17)         | Reference | 0.94 (0.46, 1.93)          | 0.82 (0.40, 1.66)         | 0.86 (0.35, 2.11)         | 0.688        |
| <b>Subgroup: Participants without metabolic syndrome (n = 1443)</b> |                           |           |                            |                           |                           |              |
| 1-MU                                                                | 0.97 (0.80, 1.17)         | Reference | 0.89 (0.49, 1.61)          | 1.10 (0.61, 2.01)         | 0.84 (0.43, 1.64)         | 0.782        |
| 3-MU                                                                | 0.97 (0.83, 1.13)         | Reference | 0.69 (0.39, 1.22)          | 1.07 (0.58, 1.99)         | 0.82 (0.43, 1.60)         | 0.893        |
| 7-MU                                                                | 0.98 (0.85, 1.12)         | Reference | 0.57 (0.33, 0.99)          | 1.04 (0.59, 1.83)         | 0.75 (0.39, 1.44)         | 0.795        |
| 1,3-DMU                                                             | 1.13 (0.95, 1.33)         | Reference | 1.04 (0.59, 1.84)          | 1.25 (0.72, 2.16)         | 1.57 (0.77, 3.22)         | 0.214        |
| 1,7-DMU                                                             | 1.12 (0.96, 1.30)         | Reference | 1.30 (0.79, 2.16)          | 1.21 (0.64, 2.29)         | 1.85 (0.91, 3.78)         | 0.147        |
| 3,7-DMU                                                             | 1.04 (0.89, 1.21)         | Reference | 0.75 (0.42, 1.33)          | 1.23 (0.69, 2.18)         | 0.90 (0.50, 1.60)         | 0.848        |
| 1,3,7-TMU                                                           | <b>1.19 (1.02, 1.39)*</b> | Reference | 1.41 (0.76, 2.63)          | 1.64 (0.86, 3.13)         | <b>2.52 (1.29, 4.90)*</b> | <b>0.015</b> |
| 1-MX                                                                | 0.98 (0.84, 1.14)         | Reference | 1.10 (0.67, 1.81)          | 0.89 (0.48, 1.65)         | 0.89 (0.50, 1.56)         | 0.546        |
| 3-MX                                                                | 0.91 (0.78, 1.05)         | Reference | 0.64 (0.36, 1.12)          | 1.08 (0.59, 1.95)         | 0.61 (0.32, 1.17)         | 0.365        |
| 7-MX                                                                | 0.88 (0.77, 1.01)         | Reference | 0.71 (0.46, 1.11)          | 1.17 (0.65, 2.13)         | <b>0.54 (0.32, 0.91)*</b> | 0.143        |
| 1,3-DMX                                                             | 1.04 (0.88, 1.24)         | Reference | 0.97 (0.52, 1.81)          | 0.95 (0.51, 1.79)         | 1.22 (0.65, 2.30)         | 0.591        |

|           |                   |           |                   |                   |                   |       |
|-----------|-------------------|-----------|-------------------|-------------------|-------------------|-------|
| 1,7-DMX   | 1.05 (0.91, 1.21) | Reference | 1.60 (0.95, 2.69) | 1.16 (0.63, 2.14) | 1.34 (0.70, 2.54) | 0.610 |
| 3,7-DMX   | 0.97 (0.85, 1.11) | Reference | 0.78 (0.45, 1.36) | 1.21 (0.70, 2.10) | 0.87 (0.49, 1.53) | 0.986 |
| 1,3,7-TMX | 1.08 (0.94, 1.23) | Reference | 1.12 (0.61, 2.05) | 1.32 (0.60, 2.94) | 1.63 (0.83, 3.20) | 0.170 |
| AAMU      | 1.01 (0.83, 1.22) | Reference | 1.08 (0.59, 2.00) | 1.27 (0.75, 2.14) | 0.92 (0.52, 1.64) | 0.930 |

**Notes:** <sup>a</sup>, The caffeine and its metabolites were corrected with urinary creatinine and ln-transformed and then introduced into survey-weighted multivariate logistic regression models as continuous variables. <sup>b</sup>, The caffeine and caffeine metabolites were corrected with urinary creatinine and classified into four groups based on quartile and then introduced into survey-weighted multivariate logistic regression models as categorical variables. The models were adjusted for all covariates, including age, gender (was not adjusted in the subgroup analysis stratified by gender), race/ethnicity, education level, marriage status, PIR, smoking status, daily alcohol intake, physical activity, BMI, hypertension, HbA1c, daily energy intake, and survey cycle. The results are depicted as odds ratios (95% confidence intervals). **Bold font** indicates statistically significant; \*,  $P < 0.05$ ; \*\*,  $P < 0.01$ ; \*\*\*,  $P < 0.001$ .

**Table S6** Association of individual urinary caffeine and its metabolites with advanced liver fibrosis in subgroup analyses

| Metabolites                                | Continuous <sup>a</sup>   | Quantile1 <sup>b</sup> | Quantile2                   | Quantile3                 | Quantile4                 | <i>P</i> for trend |
|--------------------------------------------|---------------------------|------------------------|-----------------------------|---------------------------|---------------------------|--------------------|
| <b>Subgroup: Males (<i>n</i> = 983)</b>    |                           |                        |                             |                           |                           |                    |
| 1-MU                                       | 0.84 (0.59, 1.21)         | Reference              | 1.53 (0.47, 4.97)           | 0.88 (0.23, 3.37)         | 1.01 (0.32, 3.14)         | 0.778              |
| 3-MU                                       | 0.92 (0.71, 1.20)         | Reference              | 1.92 (0.78, 4.72)           | 0.89 (0.37, 2.15)         | 0.68 (0.32, 1.42)         | 0.164              |
| 7-MU                                       | 0.84 (0.67, 1.07)         | Reference              | 1.52 (0.59, 3.96)           | 0.68 (0.21, 2.22)         | 0.62 (0.26, 1.52)         | 0.168              |
| 1,3-DMU                                    | 0.92 (0.68, 1.23)         | Reference              | 0.72 (0.26, 2.01)           | 0.68 (0.22, 2.11)         | 0.86 (0.32, 2.31)         | 0.746              |
| 1,7-DMU                                    | 0.93 (0.70, 1.23)         | Reference              | 0.88 (0.31, 2.51)           | 0.87 (0.24, 3.15)         | 0.79 (0.28, 2.24)         | 0.689              |
| 3,7-DMU                                    | 0.90 (0.69, 1.17)         | Reference              | 0.93 (0.37, 2.34)           | 0.99 (0.39, 2.49)         | 0.53 (0.20, 1.45)         | 0.270              |
| 1,3,7-TMU                                  | 0.99 (0.74, 1.32)         | Reference              | 0.79 (0.29, 2.14)           | 1.40 (0.44, 4.46)         | 1.16 (0.37, 3.60)         | 0.595              |
| 1-MX                                       | 0.78 (0.56, 1.07)         | Reference              | 0.53 (0.21, 1.34)           | 0.44 (0.15, 1.33)         | 0.56 (0.20, 1.61)         | 0.276              |
| 3-MX                                       | 0.79 (0.62, 1.01)         | Reference              | 1.62 (0.60, 4.36)           | 0.41 (0.16, 1.07)         | 0.66 (0.29, 1.47)         | 0.060              |
| 7-MX                                       | <b>0.71 (0.55, 0.90)*</b> | Reference              | 0.66 (0.24, 1.81)           | 0.46 (0.20, 1.04)         | <b>0.30 (0.12, 0.75)*</b> | <b>0.016</b>       |
| 1,3-DMX                                    | 0.88 (0.66, 1.17)         | Reference              | 0.79 (0.27, 2.33)           | 0.89 (0.33, 2.39)         | 0.58 (0.17, 2.01)         | 0.431              |
| 1,7-DMX                                    | 0.85 (0.63, 1.15)         | Reference              | 1.09 (0.39, 3.04)           | 0.86 (0.30, 2.47)         | 0.52 (0.15, 1.77)         | 0.276              |
| 3,7-DMX                                    | 0.83 (0.66, 1.03)         | Reference              | 0.79 (0.32, 1.93)           | 0.52 (0.19, 1.41)         | 0.50 (0.21, 1.18)         | 0.091              |
| 1,3,7-TMX                                  | 0.95 (0.73, 1.23)         | Reference              | 0.98 (0.37, 2.62)           | 1.07 (0.39, 2.98)         | 1.04 (0.34, 3.14)         | 0.912              |
| AAMU                                       | 0.81 (0.61, 1.07)         | Reference              | <b>0.24 (0.07, 0.80)*</b>   | 0.45 (0.14, 1.44)         | 0.43 (0.16, 1.18)         | 0.238              |
| <b>Subgroup: Females (<i>n</i> = 1085)</b> |                           |                        |                             |                           |                           |                    |
| 1-MU                                       | 0.66 (0.41, 1.05)         | Reference              | <b>0.18 (0.07, 0.42)***</b> | <b>0.32 (0.13, 0.77)*</b> | <b>0.17 (0.05, 0.61)*</b> | <b>0.028</b>       |
| 3-MU                                       | 0.87 (0.64, 1.19)         | Reference              | 1.81 (0.84, 3.90)           | 1.37 (0.56, 3.38)         | 0.76 (0.27, 2.12)         | 0.556              |
| 7-MU                                       | 0.83 (0.65, 1.05)         | Reference              | 0.96 (0.42, 2.17)           | 0.63 (0.24, 1.66)         | 0.45 (0.17, 1.21)         | 0.126              |
| 1,3-DMU                                    | <b>0.71 (0.53, 0.94)*</b> | Reference              | 0.51 (0.18, 1.43)           | <b>0.32 (0.12, 0.89)*</b> | <b>0.22 (0.06, 0.74)*</b> | <b>0.022</b>       |
| 1,7-DMU                                    | 0.79 (0.61, 1.01)         | Reference              | 0.93 (0.30, 2.89)           | 0.39 (0.13, 1.19)         | 0.30 (0.09, 1.07)         | <b>0.043</b>       |
| 3,7-DMU                                    | <b>0.75 (0.58, 0.97)*</b> | Reference              | 0.69 (0.27, 1.80)           | 0.91 (0.40, 2.04)         | 0.36 (0.13, 1.00)         | 0.082              |
| 1,3,7-TMU                                  | 0.78 (0.60, 1.01)         | Reference              | 0.46 (0.13, 1.59)           | 0.63 (0.21, 1.92)         | <b>0.23 (0.06, 0.84)*</b> | 0.071              |
| 1-MX                                       | <b>0.68 (0.49, 0.96)*</b> | Reference              | <b>0.44 (0.21, 0.91)*</b>   | <b>0.30 (0.10, 0.90)*</b> | <b>0.19 (0.05, 0.67)*</b> | <b>0.020</b>       |
| 3-MX                                       | 0.81 (0.62, 1.06)         | Reference              | 0.73 (0.27, 1.94)           | 0.76 (0.32, 1.82)         | 0.41 (0.15, 1.11)         | 0.162              |

|                                                                     |                           |           |                            |                            |                           |              |
|---------------------------------------------------------------------|---------------------------|-----------|----------------------------|----------------------------|---------------------------|--------------|
| 7-MX                                                                | <b>0.78 (0.61, 0.98)*</b> | Reference | 0.85 (0.36, 1.99)          | 0.88 (0.41, 1.85)          | 0.47 (0.18, 1.23)         | 0.150        |
| 1,3-DMX                                                             | <b>0.69 (0.53, 0.91)*</b> | Reference | 0.39 (0.14, 1.10)          | <b>0.34 (0.15, 0.76)*</b>  | <b>0.17 (0.05, 0.61)*</b> | <b>0.012</b> |
| 1,7-DMX                                                             | <b>0.74 (0.59, 0.93)*</b> | Reference | 0.53 (0.22, 1.26)          | <b>0.21 (0.07, 0.61)**</b> | <b>0.20 (0.06, 0.61)*</b> | <b>0.006</b> |
| 3,7-DMX                                                             | <b>0.79 (0.65, 0.96)*</b> | Reference | 0.59 (0.29, 1.22)          | <b>0.40 (0.18, 0.91)*</b>  | <b>0.33 (0.12, 0.88)*</b> | <b>0.048</b> |
| 1,3,7-TMX                                                           | 0.81 (0.64, 1.03)         | Reference | 0.59 (0.19, 1.88)          | 0.54 (0.21, 1.38)          | 0.29 (0.07, 1.20)         | 0.105        |
| AAMU                                                                | <b>0.67 (0.48, 0.95)*</b> | Reference | 0.88 (0.30, 2.53)          | <b>0.26 (0.09, 0.74)*</b>  | <b>0.24 (0.06, 0.91)*</b> | <b>0.016</b> |
| <b>Subgroup: Participants with metabolic syndrome (n = 625)</b>     |                           |           |                            |                            |                           |              |
| 1-MU                                                                | 0.78 (0.57, 1.07)         | Reference | 0.59 (0.22, 1.56)          | 0.68 (0.26, 1.75)          | 0.52 (0.19, 1.38)         | 0.251        |
| 3-MU                                                                | 0.96 (0.78, 1.19)         | Reference | 1.39 (0.64, 3.02)          | 1.18 (0.61, 2.28)          | 0.83 (0.41, 1.65)         | 0.517        |
| 7-MU                                                                | 0.89 (0.73, 1.08)         | Reference | 0.91 (0.42, 1.98)          | 0.61 (0.30, 1.25)          | 0.64 (0.29, 1.45)         | 0.182        |
| 1,3-DMU                                                             | 0.86 (0.68, 1.08)         | Reference | 1.13 (0.41, 3.09)          | 0.68 (0.28, 1.61)          | 0.72 (0.32, 1.63)         | 0.243        |
| 1,7-DMU                                                             | 0.88 (0.71, 1.09)         | Reference | 1.50 (0.49, 4.61)          | 1.01 (0.35, 2.88)          | 0.59 (0.25, 1.42)         | 0.156        |
| 3,7-DMU                                                             | 0.88 (0.71, 1.08)         | Reference | 0.88 (0.46, 1.70)          | 1.16 (0.60, 2.25)          | 0.62 (0.27, 1.41)         | 0.368        |
| 1,3,7-TMU                                                           | 0.90 (0.74, 1.10)         | Reference | 0.99 (0.36, 2.78)          | 1.52 (0.61, 3.79)          | 0.69 (0.31, 1.53)         | 0.593        |
| 1-MX                                                                | 0.77 (0.59, 1.00)         | Reference | 0.71 (0.33, 1.53)          | 0.54 (0.24, 1.22)          | 0.44 (0.18, 1.09)         | 0.081        |
| 3-MX                                                                | 0.91 (0.74, 1.11)         | Reference | 0.83 (0.36, 1.89)          | 0.53 (0.29, 1.00)          | 0.69 (0.32, 1.50)         | 0.193        |
| 7-MX                                                                | 0.84 (0.68, 1.03)         | Reference | 0.87 (0.43, 1.75)          | 0.73 (0.42, 1.28)          | 0.62 (0.28, 1.38)         | 0.212        |
| 1,3-DMX                                                             | 0.80 (0.64, 1.00)         | Reference | 0.70 (0.25, 1.98)          | 0.72 (0.30, 1.70)          | 0.40 (0.17, 1.00)         | 0.051        |
| 1,7-DMX                                                             | 0.80 (0.63, 1.01)         | Reference | 0.93 (0.41, 2.09)          | 0.76 (0.33, 1.76)          | 0.33 (0.12, 1.00)         | <b>0.042</b> |
| 3,7-DMX                                                             | 0.85 (0.72, 1.01)         | Reference | 0.78 (0.38, 1.60)          | 0.58 (0.31, 1.07)          | 0.67 (0.34, 1.31)         | 0.185        |
| 1,3,7-TMX                                                           | 0.87 (0.72, 1.05)         | Reference | 0.88 (0.34, 2.27)          | 0.85 (0.33, 2.15)          | 0.64 (0.27, 1.49)         | 0.322        |
| AAMU                                                                | 0.79 (0.62, 1.02)         | Reference | 0.59 (0.20, 1.78)          | 0.41 (0.15, 1.13)          | <b>0.43 (0.20, 0.92)*</b> | <b>0.035</b> |
| <b>Subgroup: Participants without metabolic syndrome (n = 1443)</b> |                           |           |                            |                            |                           |              |
| 1-MU                                                                | 0.72 (0.44, 1.20)         | Reference | <b>0.19 (0.06, 0.63)*</b>  | <b>0.23 (0.07, 0.77)*</b>  | 0.23 (0.06, 1.00)         | 0.061        |
| 3-MU                                                                | 0.82 (0.55, 1.21)         | Reference | 3.59 (0.85, 15.11)         | 0.95 (0.28, 3.29)          | 1.06 (0.21, 5.20)         | 0.630        |
| 7-MU                                                                | 0.78 (0.60, 1.02)         | Reference | 1.85 (0.65, 5.26)          | 0.62 (0.20, 1.87)          | 0.50 (0.12, 2.04)         | 0.156        |
| 1,3-DMU                                                             | 0.74 (0.54, 1.00)         | Reference | <b>0.10 (0.02, 0.47)**</b> | 0.36 (0.12, 1.06)          | <b>0.20 (0.05, 0.80)*</b> | 0.166        |
| 1,7-DMU                                                             | 0.82 (0.62, 1.09)         | Reference | 0.26 (0.06, 1.06)          | 0.36 (0.13, 1.00)          | 0.38 (0.09, 1.71)         | 0.327        |
| 3,7-DMU                                                             | 0.70 (0.49, 1.00)         | Reference | 0.51 (0.18, 1.43)          | 0.41 (0.12, 1.34)          | 0.28 (0.08, 1.02)         | 0.073        |

|           |                           |           |                            |                           |                           |              |
|-----------|---------------------------|-----------|----------------------------|---------------------------|---------------------------|--------------|
| 1,3,7-TMU | 0.81 (0.59, 1.13)         | Reference | 0.32 (0.09, 1.09)          | 0.53 (0.17, 1.68)         | 0.29 (0.05, 1.57)         | 0.247        |
| 1-MX      | <b>0.67 (0.46, 0.96)*</b> | Reference | <b>0.20 (0.08, 0.52)**</b> | <b>0.18 (0.06, 0.59)*</b> | <b>0.22 (0.06, 0.85)*</b> | <b>0.043</b> |
| 3-MX      | 0.75 (0.57, 1.00)         | Reference | 1.53 (0.54, 4.32)          | 0.60 (0.23, 1.58)         | 0.39 (0.09, 1.65)         | 0.111        |
| 7-MX      | <b>0.67 (0.51, 0.88)*</b> | Reference | 0.40 (0.13, 1.17)          | 0.38 (0.13, 1.13)         | <b>0.24 (0.08, 0.74)*</b> | <b>0.044</b> |
| 1,3-DMX   | 0.75 (0.55, 1.03)         | Reference | 0.47 (0.18, 1.20)          | 0.38 (0.11, 1.30)         | 0.19 (0.04, 0.94)         | 0.064        |
| 1,7-DMX   | 0.79 (0.62, 1.01)         | Reference | 0.71 (0.27, 1.82)          | <b>0.18 (0.04, 0.69)*</b> | 0.27 (0.07, 1.08)         | <b>0.035</b> |
| 3,7-DMX   | 0.78 (0.61, 1.01)         | Reference | 0.38 (0.12, 1.16)          | <b>0.20 (0.06, 0.69)*</b> | <b>0.20 (0.05, 0.80)*</b> | <b>0.029</b> |
| 1,3,7-TMX | 0.85 (0.64, 1.12)         | Reference | 0.49 (0.15, 1.58)          | 0.71 (0.26, 1.98)         | 0.34 (0.07, 1.70)         | 0.293        |
| AAMU      | <b>0.66 (0.46, 0.95)*</b> | Reference | 0.39 (0.12, 1.29)          | <b>0.25 (0.07, 0.85)*</b> | 0.24 (0.06, 1.00)         | <b>0.049</b> |

**Notes:** <sup>a</sup>, The caffeine and its metabolites were corrected with urinary creatinine and ln-transformed and then introduced into survey-weighted multivariate logistic regression models as continuous variables. <sup>b</sup>, The caffeine and its metabolites were corrected with urinary creatinine and classified into four groups based on quartile and then introduced into survey-weighted multivariate logistic regression models as categorical variables. The models were adjusted for all covariates, including age, gender (was not adjusted in the subgroup analysis stratified by gender), race/ethnicity, education level, marriage status, PIR, smoking status, daily alcohol intake, physical activity, BMI, hypertension, HbA1c, daily energy intake, and survey cycle. The results are depicted as odds ratios (95% confidence intervals). **Bold font** indicates statistically significant; \*,  $P < 0.05$ ; \*\*,  $P < 0.01$ ; \*\*\*,  $P < 0.001$ .

**Table S7** Association of individual urinary caffeine and its metabolites with non-alcoholic fatty liver disease ( $n=1815$ )

| Metabolites | Continuous <sup>a</sup>    | Quantile1 <sup>b</sup> | Quantile2         | Quantile3                 | Quantile4                  | <i>P</i> for trend |
|-------------|----------------------------|------------------------|-------------------|---------------------------|----------------------------|--------------------|
| 1-MU        | 0.97 (0.83, 1.14)          | Reference              | 1.03 (0.67, 1.59) | 1.12 (0.74, 1.71)         | 0.89 (0.55, 1.44)          | 0.740              |
| 3-MU        | 0.97 (0.83, 1.12)          | Reference              | 0.83 (0.54, 1.28) | 1.12 (0.73, 1.73)         | 0.87 (0.50, 1.48)          | 0.883              |
| 7-MU        | 0.92 (0.81, 1.06)          | Reference              | 0.62 (0.39, 1.00) | 0.87 (0.56, 1.36)         | 0.64 (0.35, 1.18)          | 0.300              |
| 1,3-DMU     | 1.15 (1.00, 1.32)          | Reference              | 1.42 (0.88, 2.32) | 1.37 (0.90, 2.07)         | <b>1.88 (1.08, 3.28)*</b>  | 0.055              |
| 1,7-DMU     | 1.14 (1.00, 1.30)          | Reference              | 1.35 (0.86, 2.12) | 1.46 (0.92, 2.31)         | <b>1.84 (1.07, 3.19)*</b>  | <b>0.044</b>       |
| 3,7-DMU     | 1.00 (0.87, 1.16)          | Reference              | 0.76 (0.50, 1.18) | 1.09 (0.76, 1.56)         | 0.84 (0.52, 1.36)          | 0.832              |
| 1,3,7-TMU   | <b>1.23 (1.08, 1.41)**</b> | Reference              | 1.50 (0.89, 2.52) | <b>1.76 (1.08, 2.87)*</b> | <b>2.79 (1.61, 4.84)**</b> | <b>0.001</b>       |
| 1-MX        | 1.00 (0.88, 1.14)          | Reference              | 1.46 (0.99, 2.15) | 0.98 (0.60, 1.61)         | 1.07 (0.71, 1.62)          | 0.798              |
| 3-MX        | 0.89 (0.76, 1.02)          | Reference              | 0.74 (0.50, 1.11) | 0.85 (0.57, 1.26)         | 0.55 (0.31, 1.00)          | 0.083              |
| 7-MX        | <b>0.84 (0.73, 0.98)*</b>  | Reference              | 0.71 (0.51, 1.00) | 0.85 (0.55, 1.32)         | <b>0.47 (0.27, 0.81)*</b>  | <b>0.030</b>       |
| 1,3-DMX     | 1.08 (0.94, 1.23)          | Reference              | 1.16 (0.70, 1.92) | 1.13 (0.73, 1.75)         | 1.39 (0.82, 2.36)          | 0.273              |
| 1,7-DMX     | 1.07 (0.95, 1.21)          | Reference              | 1.57 (0.97, 2.56) | 1.18 (0.75, 1.86)         | 1.39 (0.82, 2.36)          | 0.365              |
| 3,7-DMX     | 0.97 (0.85, 1.10)          | Reference              | 0.73 (0.51, 1.05) | 0.84 (0.60, 1.18)         | 0.78 (0.47, 1.30)          | 0.457              |
| 1,3,7-TMX   | <b>1.14 (1.02, 1.27)*</b>  | Reference              | 1.40 (0.82, 2.39) | 1.58 (0.93, 2.68)         | <b>2.06 (1.27, 3.35)**</b> | <b>0.008</b>       |
| AAMU        | 1.03 (0.88, 1.20)          | Reference              | 1.33 (0.93, 1.91) | 1.33 (0.82, 2.14)         | 1.03 (0.63, 1.67)          | 0.926              |

**Notes:** <sup>a</sup>, The caffeine and its metabolites were corrected with urinary creatinine and ln-transformed and then introduced into survey-weighted multivariate logistic regression models as continuous variables. <sup>b</sup>, The caffeine and its metabolites were corrected with urinary creatinine and classified into four groups based on quartile and then introduced into survey-weighted multivariate logistic regression models as categorical variables. The models were adjusted for all covariates, including age, gender, race/ethnicity, education level, marriage status, PIR, smoking status, daily alcohol intake, physical activity, BMI, hypertension, HbA1c, daily energy intake, and survey cycle. In this additional analysis, participants with excessive alcohol consumption and viral hepatitis were excluded before analysis. The results are depicted as odds ratios (95% confidence intervals). **Bold font** indicates statistically significant; \*,  $P < 0.05$ ; \*\*,  $P < 0.01$ ; \*\*\*,  $P < 0.001$ .

**Table S8** Association of individual urinary caffeine and its metabolites with metabolic dysfunction-associated fatty liver disease (*n*=2068)

| Metabolites | Continuous <sup>a</sup>    | Quantile1 <sup>b</sup> | Quantile2                  | Quantile3                 | Quantile4                  | <i>P</i> for trend |
|-------------|----------------------------|------------------------|----------------------------|---------------------------|----------------------------|--------------------|
| 1-MU        | 0.93 (0.81, 1.07)          | Reference              | 1.01 (0.65, 1.56)          | 1.01 (0.66, 1.52)         | 0.80 (0.50, 1.27)          | 0.366              |
| 3-MU        | 0.93 (0.82, 1.06)          | Reference              | 0.77 (0.50, 1.20)          | 1.04 (0.68, 1.58)         | 0.75 (0.46, 1.20)          | 0.481              |
| 7-MU        | 0.93 (0.82, 1.04)          | Reference              | <b>0.61 (0.43, 0.87)*</b>  | 0.84 (0.59, 1.20)         | 0.61 (0.37, 1.00)          | 0.148              |
| 1,3-DMU     | <b>1.14 (1.01, 1.28)*</b>  | Reference              | 1.33 (0.86, 2.07)          | 1.34 (0.94, 1.90)         | 1.59 (0.96, 2.65)          | 0.103              |
| 1,7-DMU     | 1.12 (1.00, 1.26)          | Reference              | 1.36 (0.96, 1.92)          | 1.42 (0.91, 2.21)         | 1.65 (1.00, 2.69)          | 0.073              |
| 3,7-DMU     | 1.02 (0.90, 1.16)          | Reference              | 0.73 (0.50, 1.06)          | 1.11 (0.78, 1.56)         | 0.85 (0.55, 1.30)          | 0.917              |
| 1,3,7-TMU   | <b>1.22 (1.09, 1.37)**</b> | Reference              | 1.43 (0.90, 2.26)          | <b>1.64 (1.06, 2.53)*</b> | <b>2.56 (1.59, 4.12)**</b> | <b>0.001</b>       |
| 1-MX        | 0.98 (0.88, 1.09)          | Reference              | 1.37 (0.93, 2.00)          | 0.91 (0.58, 1.45)         | 0.97 (0.65, 1.45)          | 0.474              |
| 3-MX        | 0.89 (0.78, 1.01)          | Reference              | 0.79 (0.55, 1.14)          | 0.87 (0.60, 1.25)         | <b>0.56 (0.34, 0.93)*</b>  | <b>0.048</b>       |
| 7-MX        | <b>0.84 (0.74, 0.96)*</b>  | Reference              | <b>0.63 (0.49, 0.81)**</b> | 0.85 (0.57, 1.27)         | <b>0.43 (0.27, 0.69)**</b> | <b>0.010</b>       |
| 1,3-DMX     | 1.07 (0.95, 1.21)          | Reference              | 1.18 (0.74, 1.86)          | 1.15 (0.78, 1.70)         | 1.30 (0.78, 2.16)          | 0.375              |
| 1,7-DMX     | 1.06 (0.95, 1.18)          | Reference              | <b>1.66 (1.12, 2.45)*</b>  | 1.22 (0.83, 1.78)         | 1.30 (0.81, 2.11)          | 0.513              |
| 3,7-DMX     | 0.97 (0.86, 1.10)          | Reference              | 0.87 (0.60, 1.27)          | 0.94 (0.68, 1.30)         | 0.83 (0.51, 1.36)          | 0.519              |
| 1,3,7-TMX   | <b>1.12 (1.01, 1.24)*</b>  | Reference              | 1.31 (0.83, 2.06)          | 1.43 (0.89, 2.30)         | <b>1.86 (1.17, 2.96)*</b>  | <b>0.019</b>       |
| AAMU        | 0.99 (0.87, 1.13)          | Reference              | 1.07 (0.81, 1.42)          | 1.20 (0.78, 1.85)         | 0.88 (0.58, 1.33)          | 0.729              |

**Notes:** <sup>a</sup>, The caffeine and its metabolites were corrected with urinary creatinine and ln-transformed and then introduced into survey-weighted multivariate logistic regression models as continuous variables. <sup>b</sup>, The caffeine and its metabolites were corrected with urinary creatinine and classified into four groups based on quartile and then introduced into survey-weighted multivariate logistic regression models as categorical variables. The models were adjusted for all covariates, including age, gender, race/ethnicity, education level, marriage status, PIR, smoking status, daily alcohol intake, physical activity, BMI, hypertension, HbA1c, daily energy intake, and survey cycle. The results are depicted as odds ratios (95% confidence intervals). **Bold font** indicates statistically significant; \*, *P* < 0.05; \*\*, *P* < 0.01; \*\*\*, *P* < 0.001.



**Table S9** Association of individual urinary caffeine and its metabolites with liver steatosis defined by FLI(+) (*n*=2068)

| Metabolites | Continuous <sup>a</sup>   | Quantile1 <sup>b</sup> | Quantile2                 | Quantile3         | Quantile4                  | <i>P</i> for trend |
|-------------|---------------------------|------------------------|---------------------------|-------------------|----------------------------|--------------------|
| 1-MU        | 0.89 (0.78, 1.01)         | Reference              | 0.95 (0.62, 1.46)         | 1.04 (0.70, 1.55) | <b>0.64 (0.43, 0.95)*</b>  | 0.052              |
| 3-MU        | 0.96 (0.84, 1.09)         | Reference              | 0.90 (0.60, 1.36)         | 1.06 (0.65, 1.72) | 0.81 (0.50, 1.33)          | 0.561              |
| 7-MU        | 0.96 (0.86, 1.08)         | Reference              | <b>0.61 (0.43, 0.88)*</b> | 0.94 (0.63, 1.41) | 0.73 (0.48, 1.12)          | 0.461              |
| 1,3-DMU     | 1.03 (0.94, 1.12)         | Reference              | 1.00 (0.68, 1.48)         | 1.17 (0.80, 1.71) | 0.99 (0.68, 1.45)          | 0.812              |
| 1,7-DMU     | 1.03 (0.95, 1.12)         | Reference              | 0.99 (0.70, 1.40)         | 1.26 (0.85, 1.87) | 0.97 (0.66, 1.42)          | 0.797              |
| 3,7-DMU     | 0.97 (0.86, 1.09)         | Reference              | 0.89 (0.60, 1.31)         | 1.15 (0.78, 1.69) | 0.84 (0.56, 1.28)          | 0.686              |
| 1,3,7-TMU   | 1.06 (0.98, 1.15)         | Reference              | 0.91 (0.59, 1.40)         | 1.22 (0.78, 1.91) | 1.36 (0.90, 2.05)          | 0.067              |
| 1-MX        | <b>0.90 (0.81, 0.99)*</b> | Reference              | 1.31 (0.93, 1.87)         | 1.03 (0.72, 1.47) | <b>0.67 (0.48, 0.93)*</b>  | <b>0.013</b>       |
| 3-MX        | 0.91 (0.81, 1.03)         | Reference              | 0.91 (0.63, 1.31)         | 0.88 (0.58, 1.34) | 0.69 (0.44, 1.09)          | 0.128              |
| 7-MX        | <b>0.85 (0.76, 0.96)*</b> | Reference              | 0.73 (0.51, 1.04)         | 0.73 (0.48, 1.09) | <b>0.49 (0.32, 0.74)**</b> | <b>0.006</b>       |
| 1,3-DMX     | 0.98 (0.90, 1.07)         | Reference              | 0.81 (0.51, 1.29)         | 0.96 (0.60, 1.54) | 0.87 (0.57, 1.31)          | 0.708              |
| 1,7-DMX     | 0.97 (0.90, 1.05)         | Reference              | 1.25 (0.78, 2.01)         | 0.95 (0.63, 1.42) | 0.91 (0.60, 1.38)          | 0.360              |
| 3,7-DMX     | 0.95 (0.86, 1.05)         | Reference              | 0.95 (0.67, 1.35)         | 0.95 (0.69, 1.32) | 0.87 (0.59, 1.28)          | 0.515              |
| 1,3,7-TMX   | 1.04 (0.96, 1.12)         | Reference              | 0.82 (0.55, 1.22)         | 1.00 (0.60, 1.65) | 1.18 (0.78, 1.77)          | 0.336              |
| AAMU        | 0.93 (0.83, 1.04)         | Reference              | 1.05 (0.73, 1.51)         | 1.10 (0.71, 1.71) | 0.71 (0.47, 1.06)          | 0.153              |

**Notes:** <sup>a</sup>, The caffeine and its metabolites were corrected with urinary creatinine and ln-transformed and then introduced into survey-weighted multivariate logistic regression models as continuous variables. <sup>b</sup>, The caffeine and its metabolites were corrected with urinary creatinine and classified into four groups based on quartile and then introduced into survey-weighted multivariate logistic regression models as categorical variables. The models were adjusted for all covariates, including age, gender, race/ethnicity, education level, marriage status, PIR, smoking status, daily alcohol intake, physical activity, BMI, hypertension, HbA1c, daily energy intake, and survey cycle. The results are depicted as odds ratios (95% confidence intervals). **Bold font** indicates statistically significant; \*, *P* < 0.05; \*\*, *P* < 0.01; \*\*\*, *P* < 0.001.

**Table S10** Association of individual urinary caffeine and its metabolites with liver steatosis defined by FLI(+)/USFLI(+) (*n*=2068)

| Metabolites | Continuous <sup>a</sup>   | Quantile1 <sup>b</sup> | Quantile2                 | Quantile3         | Quantile4                  | <i>P</i> for trend |
|-------------|---------------------------|------------------------|---------------------------|-------------------|----------------------------|--------------------|
| 1-MU        | 0.91 (0.80, 1.04)         | Reference              | 1.04 (0.67, 1.61)         | 1.17 (0.79, 1.74) | 0.69 (0.47, 1.03)          | 0.136              |
| 3-MU        | 0.96 (0.84, 1.10)         | Reference              | 0.90 (0.60, 1.34)         | 0.95 (0.59, 1.55) | 0.78 (0.48, 1.28)          | 0.409              |
| 7-MU        | 0.96 (0.86, 1.09)         | Reference              | <b>0.61 (0.43, 0.87)*</b> | 0.94 (0.62, 1.43) | 0.70 (0.44, 1.09)          | 0.373              |
| 1,3-DMU     | 1.05 (0.96, 1.15)         | Reference              | 1.00 (0.68, 1.47)         | 1.32 (0.90, 1.94) | 1.09 (0.74, 1.61)          | 0.405              |
| 1,7-DMU     | 1.05 (0.97, 1.14)         | Reference              | 0.99 (0.70, 1.40)         | 1.37 (0.92, 2.04) | 1.07 (0.72, 1.59)          | 0.414              |
| 3,7-DMU     | 0.98 (0.87, 1.11)         | Reference              | 0.91 (0.60, 1.38)         | 1.20 (0.79, 1.82) | 0.86 (0.55, 1.36)          | 0.817              |
| 1,3,7-TMU   | 1.09 (1.00, 1.18)         | Reference              | 0.96 (0.63, 1.46)         | 1.31 (0.85, 2.02) | <b>1.56 (1.03, 2.36)*</b>  | <b>0.018</b>       |
| 1-MX        | 0.92 (0.83, 1.02)         | Reference              | 1.30 (0.92, 1.83)         | 1.03 (0.71, 1.50) | 0.75 (0.54, 1.05)          | 0.051              |
| 3-MX        | 0.92 (0.81, 1.04)         | Reference              | 0.84 (0.59, 1.20)         | 0.90 (0.58, 1.40) | 0.67 (0.42, 1.06)          | 0.134              |
| 7-MX        | <b>0.86 (0.76, 0.97)*</b> | Reference              | 0.73 (0.51, 1.06)         | 0.77 (0.51, 1.17) | <b>0.48 (0.31, 0.76)**</b> | <b>0.010</b>       |
| 1,3-DMX     | 1.00 (0.91, 1.09)         | Reference              | 0.84 (0.54, 1.31)         | 1.05 (0.66, 1.67) | 0.94 (0.61, 1.46)          | 0.952              |
| 1,7-DMX     | 0.99 (0.91, 1.07)         | Reference              | 1.19 (0.75, 1.90)         | 0.96 (0.60, 1.52) | 0.95 (0.62, 1.47)          | 0.580              |
| 3,7-DMX     | 0.96 (0.86, 1.07)         | Reference              | 0.93 (0.62, 1.39)         | 0.94 (0.64, 1.37) | 0.86 (0.55, 1.34)          | 0.528              |
| 1,3,7-TMX   | 1.06 (0.98, 1.15)         | Reference              | 0.84 (0.57, 1.23)         | 1.07 (0.64, 1.80) | 1.36 (0.89, 2.09)          | 0.129              |
| AAMU        | 0.94 (0.84, 1.06)         | Reference              | 1.06 (0.74, 1.52)         | 1.20 (0.78, 1.86) | 0.74 (0.49, 1.13)          | 0.290              |

**Notes:** <sup>a</sup>, The caffeine and its metabolites were corrected with urinary creatinine and ln-transformed and then introduced into survey-weighted multivariate logistic regression models as continuous variables. <sup>b</sup>, The caffeine and its metabolites were corrected with urinary creatinine and classified into four groups based on quartile and then introduced into survey-weighted multivariate logistic regression models as categorical variables. The models were adjusted for all covariates, including age, gender, race/ethnicity, education level, marriage status, PIR, smoking status, daily alcohol intake, physical activity, BMI, hypertension, HbA1c, daily energy intake, and survey cycle. The results are depicted as odds ratios (95% confidence intervals). **Bold font** indicates statistically significant; \*, *P* < 0.05; \*\*, *P* < 0.01; \*\*\*, *P* < 0.001.

**Table S11** Association of individual urinary caffeine and its metabolites with advanced liver fibrosis among participants without excessive alcohol consumption and viral hepatitis (*n*=1815)

| Metabolites | Continuous <sup>a</sup>     | Quantile1 <sup>b</sup> | Quantile2                 | Quantile3                  | Quantile4                  | <i>P</i> for trend |
|-------------|-----------------------------|------------------------|---------------------------|----------------------------|----------------------------|--------------------|
| 1-MU        | <b>0.74 (0.60, 0.92)*</b>   | Reference              | <b>0.42 (0.19, 0.94)*</b> | <b>0.37 (0.17, 0.80)*</b>  | <b>0.35 (0.16, 0.76)*</b>  | <b>0.013</b>       |
| 3-MU        | 0.87 (0.71, 1.05)           | Reference              | 1.33 (0.79, 2.24)         | 1.01 (0.58, 1.75)          | 0.70 (0.38, 1.31)          | 0.232              |
| 7-MU        | <b>0.83 (0.73, 0.95)*</b>   | Reference              | 1.09 (0.55, 2.14)         | 0.72 (0.45, 1.16)          | <b>0.53 (0.31, 0.90)*</b>  | <b>0.014</b>       |
| 1,3-DMU     | <b>0.79 (0.66, 0.95)*</b>   | Reference              | 0.45 (0.19, 1.08)         | <b>0.42 (0.20, 0.85)*</b>  | <b>0.40 (0.19, 0.84)*</b>  | <b>0.021</b>       |
| 1,7-DMU     | 0.84 (0.72, 1.00)           | Reference              | 0.82 (0.35, 1.96)         | 0.55 (0.23, 1.28)          | 0.48 (0.22, 1.05)          | 0.058              |
| 3,7-DMU     | <b>0.80 (0.68, 0.93)**</b>  | Reference              | 0.77 (0.45, 1.31)         | 0.89 (0.48, 1.63)          | <b>0.42 (0.22, 0.81)*</b>  | <b>0.027</b>       |
| 1,3,7-TMU   | 0.86 (0.72, 1.02)           | Reference              | 0.61 (0.23, 1.62)         | 0.85 (0.39, 1.82)          | 0.46 (0.19, 1.09)          | 0.147              |
| 1-MX        | <b>0.72 (0.60, 0.86)**</b>  | Reference              | <b>0.45 (0.22, 0.91)*</b> | <b>0.28 (0.14, 0.57)**</b> | <b>0.32 (0.15, 0.67)**</b> | <b>0.003</b>       |
| 3-MX        | <b>0.81 (0.70, 0.93)**</b>  | Reference              | 0.95 (0.50, 1.80)         | 0.61 (0.38, 1.00)          | <b>0.50 (0.31, 0.82)*</b>  | <b>0.007</b>       |
| 7-MX        | <b>0.75 (0.66, 0.85)***</b> | Reference              | 0.79 (0.48, 1.30)         | 0.71 (0.39, 1.30)          | <b>0.38 (0.22, 0.66)**</b> | <b>0.005</b>       |
| 1,3-DMX     | <b>0.77 (0.66, 0.90)**</b>  | Reference              | 0.57 (0.26, 1.26)         | 0.53 (0.25, 1.09)          | <b>0.30 (0.13, 0.68)**</b> | <b>0.006</b>       |
| 1,7-DMX     | <b>0.79 (0.69, 0.91)**</b>  | Reference              | 0.76 (0.41, 1.39)         | <b>0.51 (0.29, 0.91)*</b>  | <b>0.32 (0.16, 0.64)**</b> | <b>0.002</b>       |
| 3,7-DMX     | <b>0.82 (0.73, 0.91)**</b>  | Reference              | 0.64 (0.33, 1.25)         | <b>0.41 (0.24, 0.72)**</b> | <b>0.42 (0.24, 0.72)**</b> | <b>0.003</b>       |
| 1,3,7-TMX   | 0.86 (0.74, 1.00)           | Reference              | 0.62 (0.29, 1.33)         | 0.66 (0.30, 1.42)          | 0.46 (0.19, 1.07)          | 0.120              |
| AAMU        | <b>0.72 (0.59, 0.89)**</b>  | Reference              | 0.48 (0.20, 1.14)         | <b>0.35 (0.17, 0.72)*</b>  | <b>0.33 (0.15, 0.70)*</b>  | <b>0.004</b>       |

**Notes:** <sup>a</sup>, The caffeine and its metabolites were corrected with urinary creatinine and ln-transformed and then introduced into survey-weighted multivariate logistic regression models as continuous variables. <sup>b</sup>, The caffeine and its metabolites were corrected with urinary creatinine and classified into four groups based on quartile and then introduced into survey-weighted multivariate logistic regression models as categorical variables. The models were adjusted for all covariates, including age, gender, race/ethnicity, education level, marriage status, PIR, smoking status, daily alcohol intake, physical activity, BMI, hypertension, HbA1c, daily energy intake, and survey cycle. The results are depicted as odds ratios (95% confidence intervals). **Bold font** indicates statistically significant; \*, *P* < 0.05; \*\*, *P* < 0.01; \*\*\*, *P* < 0.001.

**Table S12** Association of individual urinary caffeine and its metabolites with advanced liver fibrosis defined by FIB-4(+) (*n*=2068)

| Metabolites | Continuous <sup>a</sup>    | Quantile1 <sup>b</sup> | Quantile2                  | Quantile3                   | Quantile4                  | <i>P</i> for trend |
|-------------|----------------------------|------------------------|----------------------------|-----------------------------|----------------------------|--------------------|
| 1-MU        | 0.80 (0.60, 1.05)          | Reference              | 0.54 (0.25, 1.14)          | <b>0.36 (0.16, 0.80)*</b>   | <b>0.43 (0.21, 0.88)*</b>  | <b>0.023</b>       |
| 3-MU        | 0.97 (0.76, 1.24)          | Reference              | 0.79 (0.36, 1.74)          | 1.11 (0.53, 2.32)           | 0.69 (0.29, 1.60)          | 0.590              |
| 7-MU        | 0.89 (0.75, 1.07)          | Reference              | 1.10 (0.47, 2.57)          | 1.17 (0.58, 2.36)           | 0.76 (0.35, 1.63)          | 0.544              |
| 1,3-DMU     | <b>0.81 (0.69, 0.96)*</b>  | Reference              | 0.52 (0.22, 1.26)          | <b>0.26 (0.12, 0.56)**</b>  | <b>0.45 (0.21, 0.94)*</b>  | <b>0.020</b>       |
| 1,7-DMU     | <b>0.85 (0.74, 0.99)*</b>  | Reference              | 0.43 (0.19, 1.00)          | <b>0.34 (0.15, 0.75)*</b>   | <b>0.42 (0.19, 0.90)*</b>  | <b>0.030</b>       |
| 3,7-DMU     | 0.82 (0.66, 1.02)          | Reference              | 1.06 (0.53, 2.12)          | 0.79 (0.29, 2.15)           | 0.50 (0.24, 1.03)          | 0.081              |
| 1,3,7-TMU   | 0.88 (0.76, 1.01)          | Reference              | <b>0.35 (0.15, 0.79)*</b>  | 0.77 (0.36, 1.62)           | <b>0.40 (0.19, 0.83)*</b>  | 0.108              |
| 1-MX        | <b>0.74 (0.63, 0.87)**</b> | Reference              | <b>0.41 (0.20, 0.87)*</b>  | <b>0.19 (0.09, 0.41)***</b> | <b>0.37 (0.19, 0.72)**</b> | <b>0.001</b>       |
| 3-MX        | 0.88 (0.74, 1.04)          | Reference              | 0.79 (0.31, 2.05)          | 1.09 (0.50, 2.36)           | 0.57 (0.28, 1.13)          | 0.272              |
| 7-MX        | <b>0.81 (0.68, 0.97)*</b>  | Reference              | 1.02 (0.54, 1.92)          | 0.83 (0.30, 2.26)           | 0.58 (0.29, 1.18)          | 0.157              |
| 1,3-DMX     | <b>0.81 (0.70, 0.94)*</b>  | Reference              | 0.60 (0.30, 1.21)          | <b>0.43 (0.21, 0.88)*</b>   | <b>0.40 (0.19, 0.84)*</b>  | <b>0.012</b>       |
| 1,7-DMX     | <b>0.80 (0.70, 0.91)**</b> | Reference              | <b>0.43 (0.24, 0.76)**</b> | <b>0.38 (0.20, 0.71)**</b>  | <b>0.43 (0.24, 0.78)*</b>  | <b>0.016</b>       |
| 3,7-DMX     | <b>0.85 (0.74, 0.98)*</b>  | Reference              | 0.80 (0.32, 2.02)          | 0.65 (0.26, 1.63)           | <b>0.38 (0.19, 0.76)*</b>  | <b>0.011</b>       |
| 1,3,7-TMX   | 0.89 (0.77, 1.02)          | Reference              | 0.42 (0.18, 1.00)          | 0.59 (0.26, 1.31)           | 0.53 (0.24, 1.14)          | 0.193              |
| AAMU        | <b>0.72 (0.58, 0.90)**</b> | Reference              | <b>0.37 (0.15, 0.89)*</b>  | <b>0.25 (0.11, 0.57)**</b>  | <b>0.35 (0.19, 0.66)**</b> | <b>0.002</b>       |

**Notes:** <sup>a</sup>, The caffeine and its metabolites were corrected with urinary creatinine and ln-transformed and then introduced into survey-weighted multivariate logistic regression models as continuous variables. <sup>b</sup>, The caffeine and its metabolites were corrected with urinary creatinine and classified into four groups based on quartile and then introduced into survey-weighted multivariate logistic regression models as categorical variables. The models were adjusted for all covariates, including age, gender, race/ethnicity, education level, marriage status, PIR, smoking status, daily alcohol intake, physical activity, BMI, hypertension, HbA1c, daily energy intake, and survey cycle. The results are depicted as odds ratios (95% confidence intervals). **Bold font** indicates statistically significant; \*, *P* < 0.05; \*\*, *P* < 0.01; \*\*\*, *P* < 0.001.

**Table S13** Association of urinary caffeine and its metabolites with advanced liver fibrosis defined by NFS(+)/FIB-4(+)/APRI(+) (*n*=2068)

| Metabolites | Continuous <sup>a</sup>    | Quantile1 <sup>b</sup> | Quantile2                 | Quantile3                  | Quantile4                  | <i>P</i> for trend |
|-------------|----------------------------|------------------------|---------------------------|----------------------------|----------------------------|--------------------|
| 1-MU        | 0.79 (0.63, 1.00)          | Reference              | 0.48 (0.24, 1.00)         | <b>0.46 (0.23, 0.94)*</b>  | <b>0.43 (0.20, 0.93)*</b>  | <b>0.047</b>       |
| 3-MU        | 0.91 (0.74, 1.11)          | Reference              | 1.13 (0.63, 2.04)         | 1.13 (0.61, 2.08)          | <b>0.75 (0.39, 1.42)</b>   | 0.445              |
| 7-MU        | <b>0.83 (0.72, 0.96)*</b>  | Reference              | 1.09 (0.58, 2.07)         | 0.88 (0.52, 1.48)          | 0.63 (0.35, 1.14)          | 0.111              |
| 1,3-DMU     | <b>0.84 (0.71, 0.98)*</b>  | Reference              | 0.55 (0.25, 1.22)         | <b>0.35 (0.17, 0.70)**</b> | 0.57 (0.28, 1.16)          | 0.069              |
| 1,7-DMU     | 0.87 (0.75, 1.00)          | Reference              | 0.63 (0.32, 1.26)         | 0.48 (0.23, 1.03)          | 0.56 (0.27, 1.16)          | 0.110              |
| 3,7-DMU     | <b>0.81 (0.68, 0.97)*</b>  | Reference              | 0.89 (0.51, 1.55)         | 0.71 (0.39, 1.28)          | 0.54 (0.29, 1.00)          | <b>0.047</b>       |
| 1,3,7-TMU   | 0.89 (0.76, 1.04)          | Reference              | 0.60 (0.28, 1.29)         | 0.85 (0.40, 1.79)          | 0.59 (0.29, 1.22)          | 0.323              |
| 1-MX        | <b>0.76 (0.65, 0.89)**</b> | Reference              | <b>0.39 (0.20, 0.75)*</b> | <b>0.28 (0.14, 0.58)**</b> | <b>0.39 (0.22, 0.71)**</b> | <b>0.002</b>       |
| 3-MX        | <b>0.82 (0.70, 0.96)*</b>  | Reference              | 0.78 (0.41, 1.49)         | 0.78 (0.48, 1.25)          | <b>0.54 (0.33, 0.88)*</b>  | <b>0.040</b>       |
| 7-MX        | <b>0.77 (0.67, 0.89)**</b> | Reference              | 0.87 (0.53, 1.44)         | 0.73 (0.39, 1.37)          | <b>0.54 (0.31, 0.94)*</b>  | <b>0.044</b>       |
| 1,3-DMX     | <b>0.81 (0.70, 0.93)**</b> | Reference              | 0.62 (0.30, 1.29)         | <b>0.41 (0.19, 0.87)*</b>  | 0.48 (0.23, 1.00)          | <b>0.027</b>       |
| 1,7-DMX     | <b>0.81 (0.72, 0.91)**</b> | Reference              | 0.56 (0.29, 1.08)         | <b>0.43 (0.25, 0.74)**</b> | <b>0.46 (0.26, 0.82)*</b>  | <b>0.011</b>       |
| 3,7-DMX     | <b>0.82 (0.73, 0.91)**</b> | Reference              | 0.79 (0.45, 1.38)         | <b>0.44 (0.24, 0.79)*</b>  | <b>0.48 (0.30, 0.78)**</b> | <b>0.002</b>       |
| 1,3,7-TMX   | 0.89 (0.78, 1.01)          | Reference              | 0.64 (0.32, 1.30)         | 0.68 (0.30, 1.55)          | 0.54 (0.26, 1.16)          | 0.185              |
| AAMU        | <b>0.74 (0.61, 0.91)**</b> | Reference              | 0.45 (0.20, 1.00)         | <b>0.37 (0.19, 0.74)*</b>  | <b>0.42 (0.22, 0.83)*</b>  | <b>0.017</b>       |

**Notes:** <sup>a</sup>, The caffeine and caffeine metabolites were corrected with urinary creatinine and ln-transformed and then introduced into survey-weighted multivariate logistic regression models as continuous variables. <sup>b</sup>, The caffeine and caffeine metabolites were corrected with urinary creatinine and classified into four groups based on quartile and then introduced into survey-weighted multivariate logistic regression models as categorical variables. The models were adjusted for all covariates, including age, gender, race/ethnicity, education level, marriage status, PIR, smoking status, daily alcohol intake, physical activity, BMI, hypertension, HbA1c, daily energy intake, and survey cycle. The results are depicted as odds ratios (95% confidence intervals). **Bold font** indicates statistically significant; \*, *P* < 0.05; \*\*, *P* < 0.01; \*\*\*, *P* < 0.001.
